# Supplementary material for: Integrated Analysis of Dysregulated ncRNA and mRNA Expression Profiles in Humans Exposed to Carbon Nanotubes
Source: PLoS One. 2016 Mar 1;11(3):e0150628. doi: 10.1371/journal.pone.0150628 (PMC4773015; doi:10.1371/journal.pone.0150628)
Supplement: S4 Table — Differentially expressed lncRNAs in the blood samples of workers non-exposed and potentially exposed to MWCNTs. (FC ≥ 1.5; P<0.05). (XLSX) [file pone.0150628.s010.xlsx]

## Sheet: Table-S4 DE LncRNAs
ProbeName	p-value	Abs(FC)	Regulation	type	seqname	GeneSymbol	source	RNAlength	chrom	strand	txStart	txEnd	Xhyb	Sequence	relationship	Associated_gene_acc	Associated_gene_name	Associated_protein_name	Associated_gene_strand	Associated_gene_start	Associated_gene_end	group-M_all(raw)	group-Ctrl-all(raw)	group-M_all(normalized)	group-Ctrl-all(normalized)	[TB1](raw)	[TB2](raw)	[TB3](raw)	[TB4](raw)	[TB5](raw)	[TB14](raw)	[VB1](raw)	[VB3](raw)	[VB2](raw)	[VB4](raw)	[TB6](raw)	[TB7](raw)	[TB9](raw)	[TB10](raw)	[TB12](raw)	[TB1](normalized)	[TB2](normalized)	[TB3](normalized)	[TB4](normalized)	[TB5](normalized)	[TB14](normalized)	[VB1](normalized)	[VB3](normalized)	[VB2](normalized)
ASHGA5P036315	0.00101292	1.50054	up	noncoding	NR_045622	NABP1	RefSeq	3569	chr2	+	192542797	192553248	NR_045623	ACTACCCTGGTAATGATCTCCACCCTGACCTGGAGGAGCCATCCTCTCTAGGGGTGTAAG	exon sense-overlapping	NM_001031716	NABP1	SOSS complex subunit B2 isoform 1	+	192542860	192553248	118.634	88.976	6.66716	6.08167	42.4649	256.884	228.309	106.351	124.681	38.9934	37.2093	114.181	71.0081	110.641	52.8884	131.235	130.942	61.7724	64.3451	6.81009	6.80668	6.4525	6.16587	6.77932	6.75381	7.20134	6.36765	6.23758
ASHGA5P038544	0.00170326	1.65269	up	noncoding	ENST00000416017	RP4-612J11.1	GENCODE	588	chr1	+	75055418	75087403		GGCTTGGTCTCCACATCTGCTTTTGTTATTTCTTGGTCTTCAATTTCAATTTCTAAGGAT	natural antisense	NM_001002912	C1orf173	uncharacterized protein C1orf173	-	75033794	75139422	78.731	54.4187	6.0785	5.35368	20.8253	127.574	152.048	99.9285	88.7446	24.3661	25.0019	91.3597	40.5105	78.1113	54.5746	93.0268	42.9721	37.9199	33.8158	5.94731	5.77483	5.81901	6.07658	6.28083	6.06954	6.6055	6.05441	5.38495
ASHGA5P000174	0.00213026	1.837	up	noncoding	chr1:54356225-54366425+	chr1:54356225-54366425	LincRNAs identified by Khalil et al	10200	chr1	+	54583637	54593837		TAACCCTGTCTTGTTCTCAAAAGTCTTTGACACAAAAGCACTTTGTCTATTTCTCTGCAA	intergenic							23.8458	14.5561	4.39556	3.51821	7.87003	46.894	30.2464	32.8377	31.996	5.7081	8.7379	26.4763	8.69591	8.97622	14.3103	28.4454	16.6731	13.4129	11.3789	4.65252	4.35689	3.5942	4.48878	4.85712	3.94389	4.94309	4.32801	3.2305
ASHGA5P028990	0.00249084	1.91123	up	noncoding	ENST00000482381	RP4-565E6.1	GENCODE	552	chr1	-	146126403	146136197		CTTAAAATGTCACCTGATGTTAGTTGTCCCTCACTGATTCAAGTAATTTCCTTTATTGAG	intron sense-overlapping	ENST00000436832	WI2-3658N16.1	Neuroblastoma breakpoint family member 12 [Source:UniProtKB/TrEMBL;Acc:E7EP91]	-	146032647	146215986	39.1503	20.2499	4.89543	3.96093	6.3996	67.2535	120.316	37.7025	27.3032	11.5748	14.1136	28.539	17.5569	22.1452	18.7589	34.2479	18.7799	12.5772	17.683	4.35884	4.86438	5.46698	4.67828	4.63643	4.99911	5.7294	4.43005	4.11448
ASHGA5P055826	0.00282795	1.6116	up	noncoding	ENST00000445540	GPC6-AS2	GENCODE	587	chr13	-	94470676	94488397		GGACAAGACTGTGCTGGTATCTTTTCCTTTCTCCTCCATTTCTTTCCCATTTATCAGCAC	intronic antisense	NM_005708	GPC6	glypican-6 precursor	+	93879077	95060273	215.334	145.52	7.47079	6.7823	92.7626	493.672	323.392	268.369	171.999	58.1898	48.5606	265.724	105.825	208.692	129.457	272.938	108.137	99.327	94.2637	7.72551	7.75335	6.97626	7.53866	7.25242	7.33535	7.59619	7.5886	6.83712
ASHGA5P046920	0.00297175	2.38097	up	noncoding	ENST00000429634	RP11-153K11.3	GENCODE	417	chr10	-	69993009	69995190		CCTGTTTTTTAAGAAGTCATTCTGCATTCAAAATGTGCAGCTAGCTCCCGTTCCCTACAG	intergenic							21.7625	11.9281	4.47335	3.2218	16.1575	37.711	32.9882	23.6037	11.3683	14.1776	9.53436	28.5594	14.5754	18.5718	5	10.7723	14.1917	12.7577	7.628	5.62706	4.06186	3.68564	4.04197	3.55763	5.29293	5.08803	4.4317	3.85321
ASHGA5P016595	0.00326625	1.9308	up	noncoding	NR_036441	VRK2	RefSeq	2076	chr2	+	58273776	58387055		ATATATTTAGAGACACTGGCCATTTTTCTCTCTCCAATGCTTAGTGTGGAGTAAAGGCAG	exon sense-overlapping	NM_001130480	VRK2	serine/threonine-protein kinase VRK2 isoform 1	+	58273776	58387055	56.1167	32.0368	5.40025	4.45105	17.7295	190.345	68.4296	62.4837	30.2841	18.154	12.041	49.467	21.3262	38.5104	18.8869	75.7539	34.3348	19.3988	16.0462	5.74687	6.35863	4.60741	5.4013	4.77957	5.64446	5.47402	5.18974	4.39873
ASHGA5P043930	0.00342587	1.99173	up	noncoding	ENST00000412549	AC009542.2	GENCODE	1677	chr7	+	134883152	134884924		GCATGACCTATCAGATTTTGCTTTAAAGAAGAGGATAGGTTCTCCTTTCTCCTTAAATCT	intronic antisense	NM_014149	WDR91	WD repeat-containing protein 91	-	134868589	134896316	20.6672	11.7924	4.24122	3.2472	10.0646	52.5528	28.1986	30.8888	11.8298	9.74344	6.82398	15.2351	6.35454	11.1803	12.0079	22.4906	16.3818	6.77121	7.36053	4.98904	4.52113	3.51843	4.40021	3.60653	4.73792	4.50778	3.64875	2.86584
ASHGA5P050480	0.00382259	2.12839	up	noncoding	TCONS_00001644	XLOC_000983	LincRNAs identified by Cabili et al	364	chr1	-	119869507	119870538		GCCCTCTTGGGTAAGTCCCTTTTCAGTCCTTAGTGTCTTCCAGATAGCAGTATAGTATCT	intergenic							31.0417	16.4891	4.76774	3.67798	10.8242	40.7184	93.6524	27.3399	17.9116	18.1604	11.7635	27.963	16.5412	17.3711	16.3415	30.3408	13.4329	8.58585	12.8103	5.08934	4.16595	5.08069	4.2352	4.08847	5.64629	5.4322	4.40381	4.0272
ASHGA5P055363	0.003939	1.86449	up	noncoding	ENST00000549223	RP11-352M15.1	GENCODE	725	chr12	-	45993924	46004403		AGTGCTTTTAGAGGTAAAAGCTAAATGGAAATCTCTTTTTCTCCTCTTCCTTTCTCTTCT	intergenic							72.877	46.0166	5.9793	5.08052	43.3772	158.421	130.906	76.8805	33.893	29.7747	20.5849	89.1786	37.3345	88.7495	29.9286	63.66	40.078	32.754	29.6118	6.83025	6.09623	5.5946	5.69558	4.93813	6.36304	6.29631	6.02024	5.25748
ASHGA5P035980	0.00434603	1.98795	up	noncoding	ENST00000409139	LINC00152	GENCODE	519	chr2	+	87754947	87906324		CAGGACTTGAGTAACAGCAACATGGTAAGTTTTCTAAGTTTTCTTTTCGTCTCCCATATA	intergenic							23.0615	13.7235	4.43793	3.44665	10.5814	52.9024	41.7785	21.3734	14.4056	15.9899	8.32382	19.1367	11.7888	16.4526	12.3647	23.8784	15.5053	8.08161	7.99289	5.05866	4.53039	3.94123	3.91571	3.82497	5.46121	4.85513	3.91616	3.58896
ASHGA5P031939	0.00438925	1.88953	up	noncoding	ENST00000563397	RP11-525K10.1	GENCODE	566	chr16	+	80099745	80201474		GCCTAGTACAGTCCCCAGCTGCATCATAAACAGATGAAATGAAAAAGTTTTTTCTCCCAA	intergenic							56.796	33.6826	5.5956	4.67757	15.7666	162.43	74.9583	67.2202	38.8415	28.3555	19.9455	46.8509	41.8227	35.2911	26.509	55.6071	31.1762	26.4507	18.9217	5.59746	6.13358	4.74364	5.50584	5.13507	6.28992	6.24948	5.10976	5.43813
ASHGA5P057940	0.00499968	1.97992	up	noncoding	TCONS_00024073	XLOC_011433	LincRNAs identified by Cabili et al	550	chr15	-	39047294	39049571	TCONS_00023634	TCTAAAGAAAACTGCTTCCTGATGTTGGCGCAGTGCTGTGTTTAGTCATTCCTCCCAATG	intergenic							67.9049	36.7713	5.71976	4.73432	43.0588	187.566	89.6031	85.737	40.405	19.0883	10.1154	67.6657	24.2724	50.0407	34.1166	74.3618	26.2434	24.9143	23.4503	6.82414	6.33558	5.02072	5.84857	5.18702	5.72251	5.1864	5.63315	4.5982
ASHGA5P048248	0.00524362	1.59242	up	noncoding	AL713779R		LincRNAs identified by Khalil et al	2775	chr3	-	128268891	128271202		AAAGTCACGTGGAGATGGTGTCTCTCTTCCATTTGCCTTCCACATCACAAAAGTGCACAT	intergenic							53.3607	36.9466	5.4344	4.76318	21.5048	141.731	83.2608	63.8316	45.7211	14.3917	12.5219	43.9228	30.9422	40.2484	31.5449	75.1256	33.6471	30.0372	17.081	5.98672	5.93242	4.91149	5.43021	5.34978	5.31335	5.53649	5.01473	4.96495
ASHGA5P022653	0.0054521	1.87237	up	noncoding	ENST00000560399	RP11-89K21.1	GENCODE	548	chr2	-	45148215	45150178		TTTCATGTTACAGCTTGTCAGGTTTGATCTCCTGTCTCTTGGGTTGAGAAACCATCCCCT	intergenic							35.019	19.7317	4.77325	3.86839	7.99245	53.9303	113.423	32.5021	26.143	11.5182	11.4183	23.2244	26.9581	27.8693	13.7676	29.8501	18.8502	10.3518	10.4747	4.67286	4.55603	5.37344	4.47308	4.57709	4.99203	5.3861	4.15541	4.75832
ASHGA5P038503	0.00562402	2.5519	up	noncoding	ENST00000418078	RP11-262K1.1	GENCODE	1331	chr1	+	73240953	73256963		ATGAACTCATTTTATGTGAAACTATGGAAAGTAGGACAATCTCTCCTACAAGAAATATTG	intergenic							60.5653	24.3592	5.45741	4.10584	26.2005	120.47	201.072	45.8045	20.7495	20.424	13.8882	35.9138	29.9349	32.0094	27.8894	47.2409	7.94826	14.358	11.1334	6.22185	5.68809	6.26195	4.95758	4.2759	5.81239	5.70633	4.73519	4.92322
ASHGA5P048647	0.0060469	1.5159	up	noncoding	TCONS_00003598	XLOC_001386	LincRNAs identified by Cabili et al	1481	chr2	+	21267100	21268881		CCTTCTTCAGATGACCCACCATGGGGACAAAATCTCTGCTTCTCCTGGACTGAATTGGGA	intergenic							54.8072	42.0608	5.51487	4.91469	22.3104	102.892	110.992	77.4604	52.2644	13.9683	14.2442	44.3265	22.2742	59.0051	34.8238	82.9005	41.7729	31.666	21.9829	6.03556	5.46097	5.34056	5.70918	5.53104	5.27023	5.74488	5.02652	4.46767
ASHGA5P044124	0.00654145	1.68864	up	noncoding	uc003wto.1	CR749668	UCSC_knowngene	1698	chr8	-	11177525	11182938		TGTCCCAACTACTTACCAACTCTCTTAGGCAAAGAGTAAGGTACTTTCTTATCTAGAAAA	natural antisense	NM_015458	MTMR9	myotubularin-related protein 9	+	11141999	11185654	30.9414	16.6454	4.42796	3.6721	7.06919	25.981	119.274	23.8813	20.9612	7.55642	6.42122	36.3867	13.3499	29.4289	10.4805	24.9639	14.2231	13.8976	10.1737	4.50002	3.60916	5.45265	4.05989	4.29119	4.36216	4.39495	4.75365	3.74227
ASHGA5P041224	0.00654164	1.65017	up	noncoding	ENST00000511000	CTC-467M3.2	GENCODE	508	chr5	+	87987573	87988676		ATTTCTTAGTCTCTTTCTTCCCTGGCACTCTTCCTCCGAGGCCAGAAGTCTGAATTACTA	intergenic							475.847	276.86	8.49385	7.77123	292.547	1370.78	561.731	391.813	412.059	93.4486	89.1183	595.278	174.052	416.505	252.106	425.226	273.828	194.132	202.174	9.00387	9.24788	7.80286	8.10309	8.55706	8.01008	8.43724	8.78871	7.55274
ASHGA5P031694	0.00662926	1.77476	up	noncoding	NR_024034	KIAA0664L3	RefSeq	1789	chr16	+	31711933	31718745		ACATCTAAACTTTGGAGGTCAAGGCTGTGGACAGATCAGAAGACATAGTTCCCTCCTTCT	intergenic							30.4912	19.1565	4.71892	3.89129	20.1806	74.3486	39.6654	35.7993	27.6191	6.95831	8.61326	30.7449	13.0438	30.0008	17.028	27.5549	16.8391	16.5784	13.0504	5.91008	5.00799	3.88859	4.611	4.65252	4.22933	4.91923	4.5326	3.71583
ASHGA5P036242	0.00667171	2.03818	up	noncoding	TCONS_00026823	XLOC_012925	LincRNAs identified by Cabili et al	1207	chr19	+	5558184	5581226		GTGATTTGCATACTGTTTGTTAAATGTCAAAACACCCTGAAAATGCTTTCTCCCACCTCC	intergenic							73.9127	41.9037	5.97253	4.94525	38.6479	193.953	110.498	90.1022	37.6791	24.8307	24.0897	71.5023	50.6351	52.8928	37.767	78.1011	20.7771	31.793	21.3601	6.70716	6.38731	5.33402	5.9218	5.08296	6.09701	6.54027	5.70972	5.72628
ASHGA5P056584	0.00673412	1.79521	up	noncoding	TCONS_00006336	XLOC_002952	LincRNAs identified by Cabili et al	789	chr3	+	184445192	184456749		GCATTCCTTGCTACAGCCACAAGCTGTCTCCACCATCAGATGTGGCTTACCTGGTTCCTG	intergenic							20.5669	14.0746	4.2275	3.38335	6.02323	35.1218	36.5287	19.8254	17.2891	9.3277	7.23422	33.1847	5	18.0572	10.8303	25.7769	16.6939	9.02471	13.1395	4.27368	3.9697	3.7929	3.83103	4.03728	4.68155	4.6065	4.62735	2.35685
ASHGA5P028680	0.00701947	1.62714	up	noncoding	ENST00000425094	ARHGEF7-AS2	GENCODE	777	chr13	-	111766620	111768025		AAAGCATATAAAGCTTCCAAAAATAATCAGAGGCTTAAGTCGTCTCCCCCTGCCTTCTGC	natural antisense	NM_001113511	ARHGEF7	rho guanine nucleotide exchange factor 7 isoform c	+	111767623	111947542	3381.95	2044.42	11.4309	10.7285	3399	8200.96	4022.69	3836.95	2233.66	1125.09	991.154	3246.05	2062.55	2452.39	2185.49	3503.56	1401.15	1607.96	1097.86	11.7371	11.9595	10.9786	11.6677	11.1227	11.1968	11.325	11.4596	10.6893
ASHGA5P019967	0.00737758	1.75108	up	noncoding	ENST00000506005	CTD-3028N15.1	GENCODE	800	chr14	-	45552250	45553180		GTATCTGAAGGGATATGTTATCCTCTTCAGTTGTACCACCATCTCCACTTTAATAAAAAA	bidirectional	NM_017922	PRPF39	pre-mRNA-processing factor 39	+	45553301	45584804	21.6807	14.6773	4.35635	3.54811	9.61592	47.9307	31.0415	26.7861	16.6534	11.3042	7.28578	22.828	15.8378	11.96	16.6149	25.4255	14.7004	10.0316	8.17108	4.92278	4.39066	3.623	4.21086	3.99142	4.95833	4.61869	4.13508	3.97048
ASHGA5P028385	0.00769863	2.3103	up	noncoding	uc001uid.3	BC035922	UCSC_knowngene	593	chr12	+	129595537	129597841	ENST00000512133, uc001uie.3	TACCAAGATGAAATCCACCCATCATTTCTGAATGGCTCAGTTTTGATTTCATCTCCCAAG	intronic antisense	NM_133448	TMEM132D	transmembrane protein 132D precursor	-	129556270	130388212	23.0302	8.29602	4.08971	2.88163	5.03012	41.1541	87.1835	14.3208	6.41761	10.8463	9.47613	9.81288	14.4525	10.3122	8.37186	9.93565	5	5	5	4.02285	4.18172	4.97722	3.46567	2.93689	4.89368	5.07667	3.16302	3.84171
ASHGA5P046185	0.00818793	1.96316	up	noncoding	ENST00000425150	RP11-348F1.3	GENCODE	451	chrX	-	51099795	51139314		TCCTAGAACCTCAGAGGCATGAAGCTAGAATATCTTCCCCTTCAAGGAGAATAAGCCAAG	intergenic							198.123	112.875	7.3962	6.42302	138.4	472.265	296.066	237.496	89.7527	76.0421	56.1094	218.852	105.003	178.467	119.935	170.234	67.2171	74.5714	74.701	8.19379	7.68476	6.84379	7.35281	6.29665	7.70716	7.79015	7.30053	6.82159
ASHGA5P033485	0.00849316	1.57635	up	noncoding	ENST00000578800	RP13-270P17.1	GENCODE	1035	chr18	-	3255433	3261820		GGTTTTGTTCTAGATCGTGTTTGTGGCTGTGTTCTTCAGGATATTTTCCCTCACCTTGAG	natural antisense	NM_006471	MYL12A	myosin regulatory light chain 12A	+	3247527	3256234	83.8616	55.2967	6.02458	5.36799	36.8314	238.319	111.45	106.967	64.4372	19.0551	16.6841	77.1496	38.6216	58.2806	50.2419	107.891	59.8893	40.7759	31.3768	6.64689	6.68747	5.34576	6.17262	5.816	5.72057	5.98733	5.82001	5.3099
ASHGA5P038851	0.00863357	1.96292	up	noncoding	ENST00000468961	THOC7-AS1	GENCODE	673	chr3	+	63846320	63847495		CTCTTCCTCTAATCATTCTGCACATAACAGAGACAGTGTGTATGTGTGTGTGTGTTTTTT	intronic antisense	NM_025075	THOC7	THO complex subunit 7 homolog	-	63819545	63849597	50.9953	32.5133	5.54288	4.56988	29.6312	119.688	77.3525	43.186	55.9174	18.1121	22.1187	41.9564	45.734	28.4001	22.2328	55.6465	38.2944	18.8406	18.4445	6.37362	5.67919	4.79446	4.87436	5.6239	5.64118	6.40918	4.94715	5.56929
ASHGA5P028309	0.00865525	1.80018	up	noncoding	uc021rel.1	AK055849	UCSC_knowngene	1520	chr12	+	117467713	117469233		AAATCTTACCTCCCACCGTGGTGGTTTTGTAAACCCACAGTCAATTGGATTTGCCCAGAA	exon sense-overlapping	NM_012174	FBXW8	F-box/WD repeat-containing protein 8 isoform 2	+	117348760	117468953	1053.66	642.263	9.79407	8.94593	894.625	1947.7	1447.44	1379.06	685.676	329.574	222.36	1522.83	791.94	1203.6	556.67	771.616	391.647	348.779	431.59	10.279	9.74256	9.3241	10.043	9.3082	9.76958	9.64199	10.2442	9.53328
ASHGA5P030178	0.00873909	1.75262	up	noncoding	TCONS_00008604	XLOC_004110	LincRNAs identified by Cabili et al	722	chr4	-	146117591	146124660		AGTCTCCCCCTGTGAAGGCTTGGGGCTGGTTGGGCAGTAAGCCTCACAGTAATCCTTAGT	intergenic							3512.22	2131.91	11.5574	10.7479	3421.8	7732.93	3974.72	3580.76	2025.18	1995.78	2097.54	3269.03	3138.57	2243.04	2346.8	3353.52	1240.35	1275.38	1325.69	11.7454	11.844	10.9518	11.5391	10.9718	11.8734	12.0648	11.4693	11.2194
ASHGA5P035012	0.00881913	1.98096	up	noncoding	ENST00000413669	AC009236.1	GENCODE	343	chr2	-	45401480	45402350	NR_033831	GTTGTCTTCCCTTCCTAGAAGCAATGCTTCTATGTTCTCATTTGATGTTGAATAAAACAT	intergenic							407.68	222.226	8.31355	7.32735	303.256	1177.38	519.587	523.968	243.391	110.166	94.5284	289.156	223.302	229.772	233.774	493.457	163.129	109.275	102.873	9.04061	9.00201	7.69468	8.52026	7.76874	8.25793	8.51018	7.71403	7.89928
ASHGA5P019529	0.0091559	1.91838	up	noncoding	NR_073021	ST3GAL3	RefSeq	1987	chr1	+	44173203	44396837		ATCTTCCCCCGAGCTAAGAGAAATGGTGCATGGAGACAAAAACATATCCAGGCATATGTG	exon sense-overlapping	NM_001270459	ST3GAL3	CMP-N-acetylneuraminate-beta-1,4-galactoside alpha-2,3-sialyltransferase isoform k	+	44173203	44396837	877.314	518.409	9.61229	8.6724	763.026	2049.48	1051.7	1013.2	512.408	366.4	425.007	837.293	595.488	569.354	560.338	903.561	319.385	363.506	317.234	10.1213	9.82169	8.8313	9.57097	8.85975	9.91452	10.4414	9.33745	9.19041
ASHGA5P028846	0.00923272	1.82864	up	noncoding	ENST00000414201	RP11-196P2.1	GENCODE	403	chr13	+	61491175	61492139	uc001vic.1	ATCTTAGGTCTCTTTCTCATATTTTCCTCCAATCTCTACTGCTGGGAAGGCGAGGGACAT	intergenic							23.3822	15.8335	4.54015	3.66938	9.96911	47.6244	30.8002	30.1411	23.3712	15.3387	10.3548	19.4584	18.9274	11.9216	12.4823	27.6553	12.0358	13.1839	14.6282	4.97435	4.38253	3.61386	4.36735	4.42153	5.4003	5.22807	3.9332	4.22728
ASHGA5P009597	0.00927928	1.97557	up	noncoding	ENST00000356047	AC092415.1	GENCODE	755	chr3	-	28038700	28070095		TACCTCCTCTGCTTGAAATTCAAAGAAGCCAAGATGTACGGGAAAGAAGACCAGCAGGAA	intergenic							44.021	28.0734	5.42307	4.44079	33.0843	85.8083	65.6465	31.6411	42.7497	22.1104	19.7551	51.3726	31.1322	24.3069	22.9707	50.2816	20.6932	26.6348	20.4944	6.51738	5.21365	4.54747	4.43427	5.26426	5.92957	6.23377	5.24415	4.97435
ASHGA5P039277	0.00961006	1.66806	up	noncoding	TCONS_00023699	XLOC_011504	LincRNAs identified by Cabili et al	323	chr15	-	65128038	65128508		TCAAAATGAAGAAAACCCTTTCCTCTTGAGATCTTGCCTCCAAACCAGGCTTTGGGTTGG	intergenic							25.0393	18.3145	4.54342	3.80525	13.9967	52.1954	39.9252	27.7995	22.808	8.11457	9.49838	25.9763	12.4253	19.5277	18.5924	36.7497	14.3884	13.7643	12.7538	5.43517	4.51166	3.89412	4.26028	4.39302	4.46942	5.081	4.30269	3.65153
ASHGA5P052323	0.00968401	1.91123	up	noncoding	ENST00000513704	CTC-454M9.1	GENCODE	563	chr5	+	88185124	88239160		CTCCCTCTCAAACCGCACCATTGGCACAGACTAATATTTATACAACTTTTTATTTTAAAC	intronic antisense	NM_001131005	MEF2C	myocyte-specific enhancer factor 2C isoform 2	-	88014057	88199922	3100.06	1763.17	11.2921	10.3575	2732.6	8114.54	3736.39	3765.36	2008.62	1274.85	942.56	2225.56	2635.46	1620.6	1818.3	3603.02	1118.94	900.264	645.594	11.4967	11.9377	10.8469	11.6407	10.9536	11.3355	11.2714	10.854	11.0163
ASHGA5P044096	0.00969902	1.56884	up	noncoding	ENST00000527080	USP17L8	pseudogene	1593	chr8	-	7829182	7830775	ENST00000416902, NM_001242326, NM_001256852, NM_001256853, NM_001256854, NM_001256855, NM_001256860, NM_001256871, NM_001256873, NM_001256874, NM_001256894, NM_201402	TCAAAATACAAGTGTGGGATGAAAAACCACCATCCTGAACAGCAAAGCTCCCTGCTAAAC								19.2728	14.3271	4.17923	3.52954	6.65311	42.6232	30.8271	23.0047	17.0393	8.01521	8.50203	17.5178	16.8467	14.5419	12.8415	25.3395	9.30028	12.819	8.60098	4.41525	4.22597	3.61489	4.00625	4.02056	4.45119	4.89368	3.80608	4.05436
ASHGA5P027780	0.010007	1.86394	up	noncoding	ENST00000420901	RP11-251P6.1	GENCODE	410	chr1	-	106132315	106161540		CTGAGGAAATATGCATTGATCTTGCAGTACTTTTCTCCTCCAAATAAAAGTCAGTATGAT	intergenic							18.8094	12.0724	4.2692	3.37084	8.43881	44.3839	21.6418	20.9332	15.2598	11.2143	11.2103	17.3935	10.5607	13.2912	13.6208	16.1405	9.44216	11.5921	9.85933	4.75607	4.28244	3.23902	3.89226	3.88632	4.94493	5.35815	3.79444	3.45383
ASHGA5P000082	0.010084	1.79105	up	noncoding	AW631458		LincRNAs identified by Khalil et al	414	chr2	+	43306949	43310757		AATGCACCCTAATACATTTTCCTGGATCTCACCTGTGAATTTCCCCTGCCCGAAAATATT	intergenic							316.542	194.871	8.03147	7.19067	316.058	805.866	417.147	354.839	239.796	97.1561	75.3376	226.135	155.516	206.073	185.747	417.656	152.118	135.229	111.755	9.08454	8.46371	7.3663	7.96668	7.7442	8.0673	8.20951	7.34955	7.3847
ASHGA5P057957	0.0106048	1.62315	up	noncoding	TCONS_00024405	XLOC_011722	LincRNAs identified by Cabili et al	221	chr16	+	51811735	51847468		TATCAGTCAAAACATAAGCTCCATGAAGAAAAAAGACTCTCTTCTCCCTTGCTGTTCTAA	intergenic							285.601	184.144	7.82711	7.12831	159.607	813.417	378.096	356.277	181.613	83.3223	61.4427	251.036	118.874	225.276	193.859	352.408	162.285	120.675	115.631	8.35576	8.4769	7.20582	7.97411	7.32958	7.84938	7.91932	7.50601	6.99741
ASHGA5P056890	0.0107048	1.72392	up	noncoding	TCONS_00010294	XLOC_004767	LincRNAs identified by Cabili et al	346	chr5	-	31175317	31176072		TTTCCATTAAGTTTTTCTTCCCCCCTTGGAAGATGAATTGCATTTTATCAGTTATCTCAG	intergenic							320.427	205.279	8.11723	7.33153	248.448	773.985	413.67	415.105	191.775	119.236	99.8084	301.39	200.146	236.232	196.316	359.194	155.86	148.683	140.52	8.8374	8.41302	7.35329	8.19248	7.40904	8.37545	8.58566	7.7715	7.75473
ASHGA5P058162	0.0108775	1.87379	up	noncoding	TCONS_00027203	XLOC_013243	LincRNAs identified by Cabili et al	478	chr19	-	15716474	15718461		ATATTTACAAGTGCTGAGTTTGTCTGCTTCTCCTTATCGGGCCTCAAGAAAACGCAGCCA	intergenic							34.6959	22.8683	4.9879	4.08193	20.4146	59.32	86.1428	35.5698	23.6636	17.2863	13.1548	22.0154	13.5609	27.7058	23.0304	44.6901	18.2526	15.2337	17.6046	5.92511	4.69191	4.95939	4.60337	4.43889	5.57196	5.62523	4.08731	3.76353
ASHGA5P054979	0.0109556	1.52726	up	noncoding	TCONS_00009841	XLOC_004256	LincRNAs identified by Cabili et al	243	chr5	+	2917980	2918992		ATCTTACCAGGTGATCACAGGTGTCAGTTGGTGTCTCGCCACTCCCTGAGGGTGGATATA	intergenic							31.8047	24.1244	4.77098	4.16003	16.2409	78.6377	48.1391	36.8395	23.6788	10.7393	7.97694	32.185	20.2217	35.2781	17.5239	41.43	22.9917	18.9642	12.4614	5.63288	5.08501	4.11448	4.64788	4.44019	4.87943	4.77633	4.59166	4.32526
ASHGA5P029043	0.0110414	1.56276	up	noncoding	uc001eqh.1	AK091688	UCSC_knowngene	2513	chr1	-	147680370	147691166	ENST00000496508	GGCATTGGTACCCTCAGTTTCTTTTCTTCTGCTTTTCCTCCTAATTCAGTGTGGAAGATG	intergenic							54.227	42.9613	5.68212	5.03802	26.53	94.8457	94.8837	68.7304	46.1838	26.8094	21.247	54.5864	29.7105	60.6505	39.8737	62.0336	45.7768	32.4614	30.2227	6.23432	5.35205	5.10009	5.53558	5.36253	6.2027	6.34718	5.32253	4.91168
ASHGA5P041520	0.0111261	1.80998	up	noncoding	ENST00000522189	CTC-535M15.2	GENCODE	734	chr5	+	164776035	165205694		GAAACTAGGACTTAAAGAGTGACAAGTACCAGGCATGAGAAACACAGCTCCCTTAAAGAA	intergenic							22.5734	13.6286	4.24785	3.39188	7.90578	32.5277	76.0993	12.6909	15.6512	8.1464	9.7208	17.845	10.2022	12.0372	11.9222	21.7415	13.6289	20.8679	5	4.65766	3.87991	4.76789	3.3331	3.91879	4.47531	5.12154	3.82864	3.4155
ASHGA5P021176	0.0111946	1.56435	up	noncoding	uc001ozj.3	BC042472	UCSC_knowngene	699	chr11	+	78244221	78269593		GAGACTGGAATTGAAGCACTACTTTAAGATTTATTGTCTCCTCTTCTACAAGGATATACA	intronic antisense	NM_001243251	NARS2	probable asparagine--tRNA ligase, mitochondrial isoform 2	-	78147006	78285909	17.2529	11.7362	3.92055	3.27498	5.01533	50.2541	14.6391	22.9892	13.2317	7.29747	5.44312	19.1527	7.47364	9.35073	10.8201	22.0905	13.0482	11.5334	7.83659	4.01863	4.45617	2.83676	4.00533	3.72823	4.3006	4.10102	3.91765	3.05234
ASHGA5P030033	0.011429	1.61376	up	noncoding	uc021smi.1	T-18	UCSC_knowngene	221	chr15	-	51593082	51593303		TGCTGTTTCTCCTAAAACATTTTGCTGGCCTTCAATAATATTGGTGTCCAAATTCAGTTT	intron sense-overlapping	NM_000103	CYP19A1	cytochrome P450 19A1	-	51500253	51630795	44.4845	35.3844	5.39299	4.70257	19.2367	82.6927	68.4903	46.6212	45.672	20.3078	17.2511	55.6039	30.3663	51.0786	26.0331	61.8406	32.8761	21.346	24.1504	5.85229	5.1565	4.60928	4.98183	5.34789	5.80416	6.0426	5.3494	4.94041
ASHGA5P035028	0.0115628	2.07283	up	noncoding	TCONS_00004502	XLOC_002401	LincRNAs identified by Cabili et al	548	chr2	-	176748703	176749791		TAAAGCAACAGCTGCTATTGAGGATCCGTGGATAATTGTTAATGGATGGGGGCTTCCTGT	intergenic							20.2501	6.65678	3.70981	2.65821	9.93114	15.8417	91.234	11.3307	13.2068	5.71727	5	9.73925	6.38333	5	5	8.67803	7.2181	7.15264	7.16536	4.9658	3.02721	5.04449	3.20134	3.72578	3.94585	2.61568	3.15237	2.86973
ASHGA5P056356	0.0115967	1.7473	up	noncoding	TCONS_00003675	XLOC_001469	LincRNAs identified by Cabili et al	636	chr2	+	52925299	52926173		TAGCACCAAGAATGAAGTAGAAGACTGCTCTCCTATAGCAAAAAATCTTCTACAGCAACA	intergenic							12.9079	8.61121	3.80183	2.99671	5.01514	21.8691	15.5419	14.3904	13.7013	9.87252	6.32142	16.5512	12.6413	5.57317	7.54868	12.447	7.77536	6.66531	7.62774	4.01823	3.41033	2.89317	3.47069	3.76286	4.75497	4.36339	3.74103	3.67656
ASHGA5P029300	0.011959	1.74309	up	noncoding	ENST00000567837	RP11-1078H9.6	GENCODE	2626	chr14	-	90955355	90957981		TGCAGAATCACTCCTTTGTTGTTTTATGGGGGTCTTCCCTGGCATGGATGAAAATAAGCC	intergenic							51.9512	40.4563	5.6307	4.82905	27.653	98.1061	86.4429	56.2497	46.5254	24.4799	21.6977	54.4552	24.1496	70.0486	27.9898	75.5263	32.4841	22.5794	30.4165	6.29288	5.3934	4.96539	5.24875	5.37147	6.07584	6.37914	5.3187	4.59089
ASHGA5P038550	0.0120071	1.80929	up	noncoding	ENST00000483289	RP11-379K17.4	GENCODE	5523	chr3	-	169661771	169684014		AATTATAAATTATAGTGTGTCTCTCCTCTCTTACCAAGGACTAAGGGCTAAAGTATCGAC	bidirectional	NM_003262	SEC62	translocation protein SEC62	+	169684579	169716161	146.538	92.6647	6.98517	6.12975	83.2636	422.012	183.238	153.275	98.7446	64.1253	50.1454	117.502	92.7927	118.46	78.5625	174.12	70.6454	61.7796	52.2929	7.59715	7.53317	6.10849	6.6997	6.4363	7.46872	7.63429	6.40357	6.65053
ASHGA5P028928	0.0122853	1.83104	up	noncoding	ENST00000421601	LINC00443	GENCODE	1172	chr13	+	107306263	107324511	NR_047026	AAGAGGTTGATCCTCCAAAATTCAAACAAGGAAAAATCTCTCCCAATCTCTCCTTTCCTC	intergenic							1184.77	749.737	10.0401	9.16748	1147.63	2545.27	1457.57	1391.34	767.764	550.295	483.111	1135.18	980.239	753.365	798.923	1394.58	425.256	464.768	431.037	10.5488	10.1904	9.33068	10.0503	9.48634	10.3496	10.5702	9.79484	9.80402
ASHGA5P037196	0.0123883	1.83544	up	noncoding	TCONS_00026166	XLOC_012579	LincRNAs identified by Cabili et al	2433	chr17	-	74775768	74778303		TTAACATCTCCCCAAATAGTTATGTTCCATTCCCGCACCCAGGATGATAGACTTGCACTG	intergenic							4446.98	2528.51	11.8539	10.9778	2257.85	9983.65	6755.78	4633.13	2532.2	2245.45	1467.97	5699.82	3649.21	4252.39	2339.37	3195.67	1124.42	1588.04	1550.49	11.2638	12.3393	11.7987	12.0169	11.3054	12.0087	11.7454	12.3529	11.3951
ASHGA5P037756	0.0124179	1.60368	up	noncoding	NR_024009	CN5H6.4	RefSeq	1532	chr22	-	46691039	46692557		ATCATGTCAGCACATAGTAGGTGTGGCCTATGTATGGCAGATTCATTTCTGCCCCCAATA	bidirectional	NM_016426	GTSE1	G2 and S phase-expressed protein 1	+	46692637	46726707	42.9373	30.7653	5.21431	4.53292	27.292	91.7996	82.5304	46.2837	21.6943	15.5705	11.5265	46.8019	21.4732	38.0611	24.556	57.1696	24.9049	28.9366	20.2556	6.27466	5.306	4.8995	4.97046	4.33434	5.42062	5.40066	5.10822	4.40928
ASHGA5P038445	0.0124186	1.67519	up	noncoding	ENST00000466206	RP11-657O9.1	GENCODE	562	chr3	-	135074908	135158671		TGAAGTTTTCTGACTCTATCTTTCTTTTCCCGTGGCCACTGTTACCTCTCCAGAACAGAC	intergenic							19.6327	13.9219	4.19237	3.44804	5.83736	43.985	27.9909	26.485	17.3848	8.8697	8.19317	18.3157	14.369	6.5901	12.1207	29.3515	12.9657	9.70353	12.3527	4.2317	4.2682	3.51074	4.19339	4.04522	4.60155	4.82744	3.86071	3.83574
ASHGA5P029637	0.0125496	2.30069	up	noncoding	ENST00000554032	RP6-65G23.3	GENCODE	368	chr14	+	71276921	71282108		TGTTCATTAGAACTCTGAAAACTACAGTTCTCCCCTTTATGAGGACTGCACCACAGCTCG	bidirectional	ENST00000381250	MAP3K9	mitogen-activated protein kinase kinase kinase 9 [Source:HGNC Symbol;Acc:6861]	-	71196652	71276223	399.362	197.294	8.41193	7.20986	398.509	880.235	561.476	430.983	132.337	202.705	131.964	456.686	290.72	348.433	186.798	203.609	108.263	114.634	128.599	9.33745	8.57505	7.80193	8.24176	6.87173	9.11787	8.96994	8.37967	8.27088
ASHGA5P042804	0.0126071	1.83313	up	noncoding	TCONS_00019317	XLOC_009152	LincRNAs identified by Cabili et al	776	chr11	+	63261874	63268075		GTAAGGACCTTGGAACACTTTCACTCTAATCTTTCCTACCCATGCTATTTTAGTCTGCCC	intergenic							33.0923	20.8857	4.82881	3.9545	24.2901	80.7123	46.1756	45.9593	14.4007	10.0243	9.60512	33.5709	18.5582	24.392	14.8953	43.1574	16.7623	14.7336	13.7013	6.1326	5.12006	4.06475	4.96174	3.82448	4.78066	5.10209	4.64412	4.19705
ASHGA5P048756	0.0126661	1.66123	up	noncoding	ENST00000558071	RP11-798K3.2	GENCODE	741	chr15	-	67278698	67351591		TTATTTTTAGAATTAGACCTTTACGAGAAGCACAGTTTTGTCTTCAGTTTCCTCTCCCCC	intergenic							37.1434	22.3052	4.80513	4.07288	14.2381	118.08	53.2717	41.8637	21.4246	6.62697	10.2329	31.4085	13.9398	26.9325	22.3327	38.9682	21.3653	19.2592	13.3389	5.45891	5.65858	4.25038	4.8285	4.3175	4.16307	5.20481	4.55931	3.79841
ASHGA5P019582	0.0127076	1.6688	up	noncoding	ENST00000493616	GLYCTK-AS1	GENCODE	445	chr3	-	52322598	52333040		GCAGAAGAAGATGGACAAGAGCCTAGAAGATCCCAGCCTTGCCACTGGGTATGAGCACAG	intronic antisense	NM_001144951	GLYCTK	glycerate kinase isoform 2	+	52321835	52327021	38.9498	26.4573	5.13873	4.39992	19.576	92.7733	63.2069	37.0055	30.1782	16.4517	13.222	39.1845	26.3019	17.6038	22.049	31.4415	27.9665	40.0661	19.7722	5.87035	5.32295	4.48907	4.65402	4.77477	5.50278	5.63594	4.85993	4.71805
ASHGA5P055164	0.0129212	1.84036	up	noncoding	ENST00000525260	RP11-728F11.4	GENCODE	891	chr11	+	117704607	117708370		TCCCTACAGCTTGTACTCTGCCTCTGACTCTCTTCCAAGAACAATTTGGCAAGTTCTAAT	intronic antisense	NM_001204268	FXYD6-FXYD2	FXYD6-FXYD2 read-through protein isoform 1 precursor	-	117690789	117747746	45.6067	31.3611	5.42024	4.54025	21.3941	74.3074	71.344	60.0358	34.3255	17.1351	19.864	66.448	29.2023	41.4645	31.9023	49.7397	26.8434	14.6587	25.7168	5.97862	5.00744	4.66902	5.33902	4.95869	5.56102	6.24355	5.60456	4.887
ASHGA5P013882	0.0129691	1.68016	up	noncoding	NR_037910	PRLR	RefSeq	1498	chr5	-	35048860	35118224		ACTTTTTCTCAACACCTGCCTTCTGAATGAGAGACACTCATGCATGAATGTCCAGACTAC	exon sense-overlapping	NM_000949	PRLR	prolactin receptor isoform 1 precursor	-	35055801	35230823	9.9102	6.68663	3.29162	2.54302	5	18.9362	14.2471	12.0442	11.7299	6.07741	5.57598	5.67074	5.7194	5	5	16.087	5	5	5	2.62964	3.24655	2.80865	3.27204	3.59732	4.03662	4.1381	2.60403	2.7612
ASHGA5P028682	0.0130519	1.89657	up	noncoding	ENST00000435037	ARHGEF7-AS1	GENCODE	321	chr13	-	111796651	111797080		CTCCCCCAAAAAGTCTTCAGCATACTAAGCAAGTCGTTTACTGGAAGAAATTTAAACCTT	intronic antisense	NM_001113511	ARHGEF7	rho guanine nucleotide exchange factor 7 isoform c	+	111767623	111947542	2074.48	1267.65	10.8606	9.93716	2375.59	3781.28	2324.66	2147.13	1337.97	1462.47	1239.19	1927.57	2024.35	1456.23	1362.11	1915.28	702.705	678.644	734.27	11.3317	10.7399	10.0759	10.73	10.3356	11.4948	11.5589	10.6177	10.6629
ASHGA5P038576	0.0131577	1.94036	up	noncoding	ENST00000457125	RP11-706D8.3	GENCODE	522	chr3	-	177055415	177066954		GGCCTAAAACATCTGCCCTCTTATAGCTGTTTTATTATTATGTAAACATGGCTACAAGAT	intergenic							42.5908	27.8013	5.2226	4.26628	28.4504	101.859	57.6188	51.5432	28.2847	13.6689	12.1498	47.1516	23.8839	48.7687	27.5942	50.8973	18.0588	15.2317	10.1747	6.33014	5.44487	4.36199	5.11679	4.6859	5.2364	5.48714	5.11759	4.5726
ASHGA5P038432	0.0131836	1.67404	up	noncoding	TCONS_00014876	XLOC_006944	LincRNAs identified by Cabili et al	339	chr8	+	142121973	142123085		TGCTTGCTCTTCCCTCTTGAAGTATGGTGAGGATTAAATAATGGAGAAGGTGTAGACAGC	intergenic							37.0715	27.1952	5.11235	4.36902	16.6291	82.0143	62.6861	42.0888	32.1819	17.7068	16.3645	26.9003	27.823	24.8992	24.1376	47.9793	27.3833	21.1565	16.9877	5.66301	5.14465	4.47657	4.8367	4.86438	5.60717	5.95754	4.3488	4.80753
ASHGA5P018663	0.0131849	2.06595	up	noncoding	NR_037710	FAM161A	RefSeq	3647	chr2	-	62051982	62081278		ACTCTTCCAGAGCCTGATTTAGGCCAGTCTTCCTCCTTGTATGTGTCCTCCTCTGAAGAG	exon sense-overlapping	NM_001201543	FAM161A	protein FAM161A isoform 1	-	62051982	62081278	1152.82	592.208	9.83729	8.79048	2256.46	2359.18	1419.05	925.635	986.16	360.928	303.761	611.415	541.874	635.126	695.489	1263.2	425.365	319.216	265.189	11.2621	10.0828	9.28731	9.43938	9.87932	9.88626	10.0298	8.8313	9.07145
ASHGA5P045291	0.0132162	1.85667	up	noncoding	NR_026668	VPS13A-AS1	RefSeq	442	chr9	-	79791671	79792833		TGACCCCTATGCCTCCACCGAACCACTGACCTAAAATAAATTACAATTACAGATCTTTCG	natural antisense	NM_001018037	VPS13A	vacuolar protein sorting-associated protein 13A isoform C	+	79792360	80032399	284.478	177.589	8.02393	7.13121	320.477	540.934	307.776	278.605	298.484	90.3194	115.582	323.643	135.99	168.274	214.526	291.223	154.983	132.263	145.866	9.10251	7.88696	6.90775	7.59361	8.07315	7.95648	8.79266	7.87827	7.195
ASHGA5P036745	0.013232	1.58933	up	noncoding	NR_026728	EDEM2	RefSeq	2134	chr20	-	33703159	33735161		AATCAGCTAGTGATTCCCACTTTCCGCCCTGTATCTTGTTCTTCCCCCGCTTGTTTTTGT	exon sense-overlapping	NM_001145025	EDEM2	ER degradation-enhancing alpha-mannosidase-like 2 isoform 2 precursor	-	33703159	33735161	348.673	236.864	8.24304	7.57462	314.601	771.394	504.435	419.295	247.999	115.455	106.281	309.921	205.227	306.103	226.569	344.184	199.504	166.123	210.339	9.082	8.40908	7.64584	8.20406	7.79464	8.33456	8.6663	7.80782	7.78739
ASHGA5P047405	0.0133093	1.93244	up	noncoding	TCONS_00014981	XLOC_007062	LincRNAs identified by Cabili et al	281	chr8	-	39267714	39274897		TGTATTTGTTACTCTCCTCTCTCCAAGCAGTAGCATTCAAGGTTGTTAGAGACTGGTGCT	intergenic							214.701	131.243	7.50671	6.55629	119.948	637.674	242.373	252.715	131.918	80.7497	81.0727	171.161	148.605	150.891	98.336	291.792	91.3824	77.9372	59.7566	8.01889	8.13076	6.5451	7.44507	6.86861	7.80411	8.29598	6.94519	7.31818
ASHGA5P022004	0.0135486	1.67661	up	noncoding	ENST00000546798	HOXD-AS1	GENCODE	581	chr2	-	177041113	177042853		GTGTCCTCAGATCTGGGGACCCTTCACCTGCCTCTACTACTGCAAATGATTGGATATTCG	intergenic							77.4607	46.7327	5.89874	5.1532	31.8171	230.27	87.5386	73.6826	80.8595	14.6857	17.3765	83.456	31.8889	51.6777	50.0143	76.8016	48.0216	30.5067	38.2179	6.46599	6.64152	4.98333	5.63594	6.14773	5.33882	6.05179	5.92483	5.01091
ASHGA5P053081	0.0137422	2.50179	up	noncoding	ENST00000459691	EPS15P1	GENCODE	2071	chr7	+	46820970	46823041		GAGAGAAGAGACCTGACAGATTATCTATACTCTTCATATGTTAAAAGACCATTTCCTGTA	intergenic							14.758	7.76229	4.07254	2.74958	15.894	20.7408	18.0225	15.559	8.75084	5.90541	18.9702	14.2214	7.20576	7.93993	5.48883	17.4714	5	6.23013	5	5.60801	3.35058	3.04802	3.56151	3.2681	3.9911	6.17798	3.57503	3.01289
ASHGA5P037639	0.0137553	2.29552	up	noncoding	ENST00000415655	RP1-231P7P.1	GENCODE	577	chr22	-	27959799	27969534		GGGGCCCGGACACATTATTTTCTCCAAGGAATTTCTTCTTTTCATTATTTCCCTCCAAAG	intergenic							149.38	70.121	6.75914	5.56032	101.35	501.639	177.824	156.184	48.3971	36.1001	31.1382	142.408	53.3641	119.226	72.2042	147.891	31.5116	42.9087	23.7415	7.82153	7.77041	6.06626	6.72665	5.42493	6.63669	6.93976	6.6869	5.81539
ASHGA5P022596	0.0141403	1.63409	up	noncoding	ENST00000559363	RP11-461F11.3	GENCODE	1401	chr15	-	98096513	98103932		TAACAAGAAGCTTTATTTCCAATATATGGGTCCCATCCCATTGTAACACTAATTGAGAAC	intergenic							16.1828	11.4634	3.90416	3.19567	7.56571	40.8145	22.9265	19.6313	8.43431	6.62123	5.48742	17.9814	5	11.8731	10.3786	21.2007	12.1158	9.55958	10.1158	4.597	4.16938	3.3027	3.81984	3.22934	4.16143	4.11417	3.83943	2.35685
ASHGA5P030429	0.0141501	2.02497	up	noncoding	TCONS_00008451	XLOC_003910	LincRNAs identified by Cabili et al	737	chr4	-	25554573	25556581		ATCTCCTTCCTCTGAAGATTCTGTTCAGAATGGATAAAGGTTCAGCATCCTCCCTGGATG	intergenic							782.429	464.465	9.37698	8.35908	498.788	1744.11	1284.92	625.313	403.659	343.579	238.096	1120.97	670.051	952.604	392.936	571.241	257.588	181.282	225.55	9.60361	9.58291	9.13792	8.82011	8.53028	9.82551	9.73412	9.7814	9.33745
ASHGA5P046612	0.0143609	1.62279	up	noncoding	ENST00000412375	LL0XNC01-250H12.2	GENCODE	418	chrX	+	102753722	102754210		GCTATGTTCAACATAACTAGAGATATCTTTGGTGTTTTCCTCCCTTAGCTTCATATCTTG	intergenic							188.235	117.951	7.19978	6.5013	96.1514	558.387	222.451	238.422	113.022	46.8054	42.4843	188.161	88.9619	144.312	109.078	221.566	92.2538	85.9218	83.5662	7.76103	7.94691	6.41156	7.35879	6.63246	7.01324	7.38845	7.0858	6.5927
ASHGA5P035951	0.0143782	1.80203	up	noncoding	TCONS_00026984	XLOC_013036	LincRNAs identified by Cabili et al	395	chr19	+	31702093	31716030		CAAATTCTACTGCACCCTGACTTCAGCAACCTCCTAAATCAGAAAAGGGGGCATTAAAAA	intergenic							48.9316	38.0595	5.52033	4.67071	27.7624	79.9866	84.7846	58.5099	43.7683	22.1596	15.1755	59.3061	16.7752	73.9086	33.1415	67.9608	34.2933	17.7224	22.6147	6.29834	5.10511	4.93529	5.30564	5.29569	5.93377	5.84554	5.44326	4.04522
ASHGA5P019645	0.0143869	1.6468	up	noncoding	NR_037172	LOC100507547	RefSeq	565	chr6	-	32120578	32122142		TTCTTTAATACCCGCGTCTGGCTCCGCAGCAGAACACGAAGTTTGCATTCCCCAAGGGGC	intronic antisense	NM_138717	PPT2	lysosomal thioesterase PPT2 isoform b precursor	+	32121228	32131458	17.9654	13.7907	4.2195	3.49984	10.4251	30.6204	25.7784	21.0098	19.8313	10.824	7.42904	17.805	6.5397	15.8022	14.5232	19.4081	14.0271	15.8742	10.3606	5.03883	3.8049	3.42812	3.8965	4.21972	4.89175	4.65066	3.82549	2.89892
ASHGA5P030356	0.0145418	2.01304	up	noncoding	ENST00000566797	RP11-580I1.3	GENCODE	849	chr15	+	24686273	24693114		TCTATCTTCCTTCTCCATGGGATCTTTGAGCCATAATTTATAAAATCACCTCTACATCTC	intergenic							43.803	27.3156	5.3016	4.29223	17.7734	116.134	60.3258	45.4252	24.5934	23.2281	18.4732	44.4706	32.7077	41.079	22.4205	47.4793	18.5788	12.2225	16.7218	5.75189	5.62828	4.4253	4.94531	4.4919	6.00343	6.13713	5.02959	5.05086
ASHGA5P027839	0.0146765	1.98778	up	noncoding	ENST00000545158	RP11-392P7.7	GENCODE	369	chr12	+	13115233	13116473		CCATTTATTTACTCTTAGACTCTCTCCCTAGAAATGTATCGTTAGTGTTCATTCATCTGC	intergenic							829.61	433.496	9.27069	8.27953	484.991	2660.95	993.553	1030.19	395.192	197.706	179.924	694.379	455.181	585.589	404.474	965.313	230.342	221.518	172.056	9.56911	10.2721	8.72455	9.59347	8.50004	9.08662	9.37018	9.04941	8.83801
ASHGA5P019404	0.0147501	1.77419	up	noncoding	ENST00000482142	RP11-384F7.1	GENCODE	787	chr3	-	117723665	118276515		GTCTCCCCCAAGACTGAAGGTAACATCAGGAAGCATACTATGTAAGACAGATACAAAGGG	intergenic							5301.36	3262.83	12.1459	11.3187	5506.02	10876.5	5714.6	5051.51	3370.21	5169.18	3478.63	3244.28	6391.96	2799.84	3364.03	4881.36	1782.66	1863.83	1756.13	12.3206	12.471	11.5492	12.152	11.8146	12.8669	12.5353	11.4573	12.011
ASHGA5P043328	0.0153215	2.22368	up	noncoding	ENST00000466717	RP11-286H14.8	GENCODE	535	chr7	-	128849615	128853386		TTATACAAAAACCTTTTATTGACTGTATTTCTTCTCCCCATAACCTGGAACCCAGCCAGC	natural antisense	NM_005631	SMO	smoothened homolog precursor	+	128828712	128853385	813.454	415.673	9.31102	8.15807	526.67	2455.94	1045.44	940.538	386.85	247.973	199.463	704.764	429.287	474.95	498.361	971.622	140.222	225.401	169.87	9.67019	10.1345	8.82105	9.46161	8.46233	9.37476	9.49662	9.06711	8.77331
ASHGA5P057560	0.0153594	2.45701	up	noncoding	TCONS_00019032	XLOC_008957	LincRNAs identified by Cabili et al	211	chr10	-	116579687	116581199		TCCCACATGAGCACATGATAAATACGACCTTAATTTTCTACGTACTACCCCCAGAATGCT	intergenic							53.1531	10.5287	4.46307	3.16616	10.1462	31.5162	323.639	20.6585	12.6132	8.38549	6.65814	11.608	14.0544	8.1533	10.7826	17.1536	6.94919	11.3046	5.30316	5.00121	3.8411	6.9768	3.87854	3.67388	4.52018	4.46229	3.35058	3.80996
ASHGA5P033765	0.0155624	1.87312	up	noncoding	uc002kss.3	BC034578	UCSC_knowngene	1085	chr18	+	14089933	14091018		TTGGCAGTGAAAGAAATGCTATACTTGAGACACTAATCTCTTCCTCAAATTGAAACATCA	intergenic							14.0365	7.60952	3.73167	2.82623	7.13989	33.6581	18.9229	12.5007	5	5.32415	7.63449	22.1121	5	11.828	6.27664	12.5221	5.46344	5	7.17641	4.51486	3.91819	3.10272	3.31645	2.3654	3.84359	4.69897	4.09319	2.35685
ASHGA5P058583	0.0156315	1.84332	up	noncoding	uc010msu.3	DQ673928	UCSC_knowngene	162	chr9	-	102127199	102128798		CTTCTGGTTTCAGGACACACTGGAAAGGTTTTTCCTGAAGAACACTCCCCCAGTAAATCA	intergenic							726.804	447.258	9.30165	8.41934	659.555	1786.55	937.528	746.05	453.152	289.371	259.769	682.453	502.62	572.829	496.631	787.647	228.877	284.377	257.824	9.92374	9.61405	8.62907	9.11166	8.67797	9.58051	9.85151	9.02467	8.96559
ASHGA5P041060	0.0156703	2.02997	up	noncoding	ENST00000510509	OXCT1-AS1	GENCODE	499	chr5	+	41870221	41870818		TGTTGGCGCACACTTGCCGCTACAGCCCTTCTGTCAGCCCTTTAGCTTCGATGGGGCGCT	natural antisense	NM_000436	OXCT1	succinyl-CoA:3-ketoacid coenzyme A transferase 1, mitochondrial precursor	-	41730166	41870791	81.7984	54.7595	6.38183	5.36037	54.6841	128.401	122.267	74.9441	79.1772	45.7167	62.1474	87.05	26.0239	67.7255	58.8059	90.3152	52.9736	41.4252	46.0473	7.09409	5.78502	5.49117	5.66019	6.11896	6.97985	7.93606	5.98929	4.70108
ASHGA5P030151	0.0156882	1.92472	up	noncoding	ENST00000565737	CTD-3154N5.1	GENCODE	498	chr15	-	74905534	74907937		TTTTGTGACTTTCACACCTTTCAGAAACTTGGAGAAAGATCTGCCCCCAGGTGAGGTTTG	intronic antisense	NM_003992	CLK3	dual specificity protein kinase CLK3 isoform b	+	74900712	74922542	149.389	93.7501	7.0658	6.12115	157.116	278.382	245.748	175.741	74.4362	58.8187	50.1713	154.7	88.6952	118.521	81.5981	189.465	59.8925	50.7258	67.3537	8.33897	6.92631	6.56058	6.88994	6.02342	7.35281	7.63664	6.7977	6.58758
ASHGA5P044863	0.0157869	2.02625	up	noncoding	ENST00000517689	RP11-366K18.3	GENCODE	792	chr8	+	67104943	67108625		TTCTATCTCACTGAATTATCTGATTTCTTGTTATCTTCCACCCAAGGATGTAAGCCTCAT	intergenic							26.356	14.8656	4.5723	3.55349	13.1253	57.8699	49.8048	32.2247	9.00148	11.2125	11.5775	26.0317	26.4749	22.4171	11.2505	15.1809	7.28415	9.5004	11.9516	5.34917	4.65444	4.16041	4.45768	3.29966	4.94434	5.40589	4.30681	4.72947
ASHGA5P016561	0.0158812	1.82314	up	noncoding	ENST00000431700	BX004987.5	GENCODE	292	chr1	+	143394150	143399814	ENST00000580200	CTTGACTGAGGTATCAACCTATGTTATCTCCTCCACCAGAAAGCCCATGATATTGACATA	intergenic							211.872	134.291	7.53004	6.66361	168.549	527.894	265.247	251.175	142.145	84.0999	59.8798	195.986	142.248	162.255	137.678	249.353	78.422	95.4756	74.6093	8.41812	7.85281	6.67359	7.43791	6.97389	7.85855	7.88084	7.14461	7.25242
ASHGA5P029307	0.0161929	1.76426	up	noncoding	ENST00000553537	RP11-472N19.3	GENCODE	580	chr14	-	92719836	92730000		GGTCCCCTCAAAGAATGTCAGTCCTGAGGGTCTGTAATCCTCTCACTCCCAAAGTAAGAG	intergenic							148.951	91.7543	6.9271	6.10804	85.8524	453.364	192.902	163.072	97.2992	54.8669	39.3913	104.862	100.192	103.061	84.1202	178.272	68.592	58.5292	49.5144	7.63144	7.62293	6.18983	6.77958	6.41423	7.24431	7.28499	6.24948	6.75813
ASHGA5P023891	0.0163504	1.63554	up	noncoding	HMlincRNA858-	HMlincRNA858	LincRNAs identified by Khalil et al	11020	chr2	-	159810159	159821179		TGCTCTACCAAAGTTAGTTTTTATTTAGTAGACAGTTAGATGTTTTCCTCTCCCTGTTAC	intergenic							144.164	92.0057	6.81886	6.10909	60.3024	420.894	198.198	182.809	86.8462	51.655	26.985	125.626	94.82	105.821	83.5829	181.388	70.085	56.7626	51.5794	7.20182	7.52889	6.23895	6.94966	6.25172	7.16201	6.71815	6.49967	6.68174
ASHGA5P027336	0.0164032	2.19111	up	noncoding	TCONS_00012271	XLOC_005826	LincRNAs identified by Cabili et al	435	chr6	-	125633312	125634852		GCTAGTGCAAATAAAGTACAAATCTCTCTATCCATAACACACACAAAACACAGATGTTGA	intergenic							24.0489	13.2606	4.54652	3.41486	16.8983	66.0451	31.1725	20.6821	11.4335	17.3985	11.6114	17.1495	19.5236	11.155	11.1807	25.0193	6.20106	10.2441	9.50077	5.68789	4.84375	3.6276	3.88031	3.56453	5.57766	5.41122	3.7792	4.27384
ASHGA5P056516	0.0165144	1.82855	up	noncoding	TCONS_00005195	XLOC_002198	LincRNAs identified by Cabili et al	507	chr2	-	88986734	88989760		TTTGCGCATGATTGCACTAGAAAGAACCACATGGGGTTTATTCTTCCCTCTTTCAAGAAA	intergenic							49.8526	29.3342	5.34526	4.47456	26.8078	157.039	65.7657	57.5844	27.7346	15.0205	16.4639	32.4053	27.3005	28.6957	28.8149	57.0687	17.9757	25.425	20.059	6.24948	6.08076	4.55189	5.28312	4.65937	5.37172	5.96629	4.59944	4.77806
ASHGA5P007112	0.0165399	2.05499	up	noncoding	ENST00000328344	LINC00334	GENCODE	530	chr21	+	46654266	46678645		GTGGCCCGAGGGCTATTTTAAAATATTTTCTGTTTCCTTGATTTCTCCTCCTTTGGATGT	intergenic							141.871	82.4992	6.98889	5.94975	126.663	369.951	182.36	146.529	98.1929	74.5169	54.0014	82.7503	75.727	75.6586	93.9279	169.755	56.433	56.9716	49.0218	8.08288	7.33587	6.10123	6.63893	6.42828	7.67618	7.73439	5.91333	6.34554
ASHGA5P026034	0.0165962	1.96851	up	noncoding	ENST00000525429	RP11-687M24.4	GENCODE	593	chr11	-	125002742	125009483		CCACAATTCTCTCTCTCCTTAATTTAAAGAAATATAGAGGAGCATGTTTGAAGGAGCATA	intergenic							151.028	83.3218	6.86032	5.88322	78.5402	507.274	174.717	163.939	65.7481	42.7468	44.3387	130.921	83.5883	120.473	73.3266	170.256	58.0569	46.6155	30.9366	7.53317	7.78794	6.03915	6.78735	5.84503	6.88513	7.44349	6.56131	6.49648
ASHGA5P036019	0.0167628	1.70001	up	noncoding	ENST00000427042	AC092570.2	GENCODE	390	chr2	+	102095851	102103284		ATTATTTCCTGGTACTATCCCCACCGTGAAACGAATTTCACTACAGCATCTCCAGACAAA	intergenic							36.4782	27.4286	5.06077	4.29523	10.1061	61.5735	55.9966	44.6184	25.3815	17.1623	16.0543	60.933	19.3354	52.0365	20.5811	42.3745	24.0097	15.42	18.2432	4.99626	4.74106	4.32129	4.92065	4.535	5.5629	5.92919	5.4798	4.25735
ASHGA5P047526	0.016804	1.78573	up	noncoding	NR_038985	LOC100132987	RefSeq	2830	chr10	+	80008381	80012402		CAGAAATGTGTCTTTCATCCCATTCATATTTAATGTTCCTCCCACTTGATCTTTTGATGC	intergenic							379.948	229.579	8.28425	7.44774	373.073	1025.58	464.994	412.146	262.836	129.051	88.9858	282.915	241.016	282.841	231.916	424.78	152.317	150.239	123.943	9.25585	8.82187	7.51642	8.18181	7.88047	8.49973	8.43315	7.68476	8.01096
ASHGA5P054887	0.0168249	1.64383	up	noncoding	TCONS_00008278	XLOC_003721	LincRNAs identified by Cabili et al	430	chr4	+	147032733	147033782		TTACAAGGCAGTCCTGTTCTCCTTCACAAATGAAGCATCCACAGCACAATTGGTGACTTC	intergenic							20.6123	15.5622	4.34089	3.62383	8.49774	42.6619	34.2308	24.2791	13.1846	10.2453	11.7344	20.0646	14.5608	12.1341	14.6376	28.099	14.8312	17.6819	6.99094	4.7669	4.22681	3.72273	4.08001	3.72228	4.81047	5.42605	3.97188	3.85165
ASHGA5P058882	0.016843	1.86246	up	noncoding	uc.123+	uc.123	UCR	492	chr3	+	136983543	136984035		AGCTGACAGTGTTTTCTTCCACCTCTCAAAACCTGCTTTTAATTCTCTCTTCAAATAAGA	intergenic							25.9196	16.4478	4.49725	3.60004	8.275	65.1168	35.9437	32.9515	25.8133	14.7535	6.46124	18.0419	22.6499	9.40512	15.305	34.9633	17.9329	7.04041	7.83771	4.72693	4.82696	3.77563	4.49308	4.55906	5.34499	4.40794	3.84336	4.49271
ASHGA5P031342	0.0168788	1.82397	up	noncoding	ENST00000568136	RP11-481E4.2	GENCODE	543	chr16	-	82529597	82544501		GATATCACATGGAACTCTTCTCTCCCACTCTGTCACTTGACTGCCTTCTTGCCTGATGAG	intergenic							376.082	246.4	8.37566	7.50858	175.259	748.945	697.321	336.804	276.187	179.406	115.346	479.39	334.509	396.503	205.819	361.275	129.373	107.273	190.047	8.47484	8.36807	8.13885	7.88239	7.95374	8.94179	8.78947	8.45613	8.45186
ASHGA5P042131	0.0170259	2.13253	up	noncoding	ENST00000455607	RP11-350J20.5	GENCODE	436	chr6	-	150118391	150119308		GACCACTCACTGCACAATTCTCTCCCTCATATGCATATTTTATTTTCCTTCCAATAGATA	intronic antisense	NM_001252049	PCMT1	protein-L-isoaspartate(D-aspartate) O-methyltransferase isoform 2	+	150070830	150132557	265.121	152.985	7.86006	6.76749	141.159	725.154	327.56	321.482	134.829	143.825	107.147	219.81	204.053	157.707	152.342	322.85	76.5547	89.1538	68.2336	8.21177	8.32021	6.99535	7.81005	6.90178	8.64918	8.67944	7.31266	7.7789
ASHGA5P019500	0.0170905	1.58292	up	noncoding	ENST00000488310	RP4-584D14.5	GENCODE	577	chr7	-	150060865	150069679		ATGGAGCTAGACTACTCTCCTGTTTCCTTGTGTGCCTCCATTAGAGGAAATGTCTCTTCT	natural antisense	NM_001099695	REPIN1	replication initiator 1 isoform 3	+	150065878	150071133	37.175	29.262	5.1462	4.48362	18.6645	70.2845	50.014	48.9045	46.5276	17.0318	13.9412	32.0321	25.609	27.934	23.9784	53.0678	27.5625	25.0879	21.5944	5.81319	4.92168	4.16645	5.04521	5.37172	5.553	5.71238	4.586	4.67614
ASHGA5P027628	0.0171248	1.79052	up	noncoding	NR_024246	LOC144742	RefSeq	2291	chr12	-	119721629	119741185		TTCTTTATGGATGAAGAAATTGAGAGAAGTTAAGCAACTTTCCAGAGGCTCCCCCCAGCG	intergenic							581.004	342.439	8.91311	8.07273	643.472	1526.08	651.772	622.307	337.269	198.001	175.584	493.549	306.618	399.346	397.049	593.17	238.767	267.979	194.144	9.89317	9.38731	8.02261	8.80966	8.2717	9.08988	9.33615	8.49441	8.33837
ASHGA5P032068	0.0173068	1.89722	up	noncoding	ENST00000574016	MIR22HG	GENCODE	557	chr17	-	1616268	1619504	NR_028502	TGGTATGTGATCCCCAGCTCAGGCCTGTGCAGACAGGAAATTCTCCCCTGCAGCAAGTAG	bidirectional	NM_001163673	WDR81	WD repeat-containing protein 81 isoform 3	+	1619816	1641893	1198.98	742.749	10.0432	9.11932	933.935	2784.87	1490.25	1457.14	752.234	688.667	423.546	1061.21	879.842	805.281	901.687	1442.62	363.194	420.708	385.908	10.3293	10.3383	9.35345	10.1233	9.45147	10.6291	10.4337	9.68697	9.67426
ASHGA5P050831	0.017632	1.86646	up	noncoding	ENST00000424010	AC010980.2	GENCODE	349	chr2	+	223185392	223186378		ACCGCCTGGCAGCGGCGGTTTCTTCTCTTCGTGAAAATCGTGATCTCATCTCTCCGTCCA	intergenic							17.9076	10.0349	3.98706	3.08676	7.1249	57.2544	20.6426	25.0089	8.31213	7.69059	7.6724	9.55474	12.9246	8.27868	9.42051	20.8887	5	6.72729	7.00443	4.51212	4.63746	3.18995	4.11876	3.21139	4.38833	4.70768	3.13077	3.70485
ASHGA5P028870	0.0176576	2.23223	up	noncoding	ENST00000423629	LINC00381	GENCODE	727	chr13	+	74993309	75009296		CTTCCTGGTTGCTGTGAGGATTCAATCTAATAATATATATTAGAATGTTCCTGAACCTCT	bidirectional	ENST00000325811	AL355390.1	Uncharacterized protein [Source:UniProtKB/TrEMBL;Acc:E7EXB8]	-	74987093	74993252	103.769	60.295	6.50614	5.34765	136.619	166.075	219.79	75.6749	104.22	37.0137	34.2166	56.5474	46.9307	82.314	59.3548	131.54	51.6043	21.7875	28.5334	8.17621	6.16916	6.39381	5.67339	6.50772	6.67417	7.07898	5.37568	5.60822
ASHGA5P031671	0.0177483	1.90834	up	noncoding	ENST00000575562	RP11-2C24.6	GENCODE	1704	chr16	+	30789769	30791473		ATGTTTCATTCAAGAGTTTTCTGTCTTCCACCATCTCATAGGGCAACAGTCTCTCCCCAG	natural antisense	NM_001080417	ZNF629	zinc finger protein 629	-	30789769	30798523	66.2417	41.2951	5.84855	4.91623	31.1523	187.779	81.0732	78.5522	54.7411	27.6098	23.5286	45.4977	46.8892	38.6024	47.3629	82.4387	24.4695	25.9254	23.3775	6.4372	6.33777	4.8713	5.73051	5.59833	6.24613	6.50231	5.06486	5.60484
ASHGA5P041941	0.0177962	1.88631	up	noncoding	TCONS_00020949	XLOC_010216	LincRNAs identified by Cabili et al	628	chr12	-	119392576	119393895	TCONS_00020947	GAGGAAGACTTTGACATTTAAAAAATTCTCCATCTCTCTCCAAGTGTCCCATCCCCAACT	intergenic							271.132	152.913	7.68925	6.77368	138.219	905.752	313.594	314.597	149.494	89.7915	56.8225	200.787	158.087	183.853	139.539	342.445	82.9211	94.6595	68.8829	8.18988	8.61924	6.93823	7.77837	7.04744	7.95107	7.8083	7.18148	7.41005
ASHGA5P026336	0.0180372	2.14327	up	noncoding	CR749501R		LincRNAs identified by Khalil et al	4374	chr5	-	80201444	80205745		CTTTCCTGGATTCTTTTGAATTATTTGAATATCTTTTGGTTTTCTATCTCTTGGCTTTAA	intergenic							17.325	10.5064	4.28004	3.18023	20.1921	23.9087	23.9864	18.6613	16.3335	10.3531	11.2842	13.8812	7.63964	16.49	11.5045	17.3785	7.6933	5	7.83887	5.9103	3.5122	3.35086	3.76319	3.96739	4.82233	5.36688	3.54719	3.0772
ASHGA5P046879	0.0182188	1.71836	up	noncoding	TCONS_00017163	XLOC_007974	LincRNAs identified by Cabili et al	237	chrX	+	47531908	47544867		ACTAATAAATTTTGTTTGATGCTCTCTCTCCATACTACAATGCCTGGACCGAGGTTAGTG	intergenic							84.5131	54.6606	6.16796	5.38693	38.7431	248.128	104.038	100.895	48.6972	36.5216	27.5251	71.5576	47.2203	65.9072	51.858	96.6231	40.9832	37.1031	42.929	6.71218	6.75307	5.24578	6.0884	5.43197	6.65451	6.74695	5.71084	5.61701
ASHGA5P025296	0.0182618	1.61826	up	noncoding	NR_001536	TTTY2	RefSeq	1642	chrY	-	6274284	6296485		TGATGTAAGGGGCTTCCTGGATCTGGCTCAACATCTTCCACACTAAACTCTTCCCTGTTC	intergenic							69.3992	50.0884	5.86789	5.17344	50.7655	120.141	138.03	84.828	67.8457	18.7162	13.6328	61.2343	28.2197	52.1816	51.2723	110.562	44.5568	31.2089	32.6178	7.00177	5.68435	5.6728	5.83295	5.8907	5.69227	5.68135	5.48691	4.8315
ASHGA5P032274	0.0183103	1.9234	up	noncoding	BE174175R		LincRNAs identified by Khalil et al	327	chr10	-	112287106	112287405		ATATAAATGTTATTAGAGTGAATGAGAGAAGGAATGCCGGAAGGGCTCTCCCCATCCCCA	intergenic							452.564	236.435	8.35615	7.4125	320.433	1483.81	534.612	526.035	210.751	112.315	81.8354	350.726	203.737	294.005	259.894	516.799	135.594	147.75	97.2695	9.10174	9.34458	7.73692	8.52736	7.55103	8.28867	8.30994	7.98901	7.77743
ASHGA5P036734	0.0183352	2.13493	up	noncoding	BX093893		LincRNAs identified by Khalil et al	464	chr12	+	75841430	75841894		TGCAATATCTCTCCCTAGTTTGCCATTTGCCTTAATATTTGCCTATGATGCTGTTTAGAA	intergenic							307.219	180.861	8.12361	7.02942	184.827	768.147	352.237	375.624	168.386	162.793	152.281	293.453	243.595	193.532	177.875	364.239	81.0455	111.919	93.8247	8.52884	8.40142	7.09861	8.03905	7.22038	8.80793	9.15725	7.73541	8.0295
ASHGA5P041891	0.0183818	2.17256	up	noncoding	ENST00000421170	RP11-69I22.3	GENCODE	353	chr6	-	65440705	65443438		CCTGCCCCAAATGAATCCTCGAATTTACGTTAAGATCACATTTTGGAATTAATCTTAACA	intron sense-overlapping	NM_001142800	EYS	protein eyes shut homolog isoform 1	-	64429875	66417118	26.8914	16.5805	4.82951	3.71012	20.3022	42.6874	35.4552	27.8899	27.1679	13.3803	18.6447	29.6034	21.9909	10.6285	18.191	25.2735	16.607	7.37021	16.0025	5.91695	4.22787	3.7609	4.26457	4.62883	5.20308	6.15246	4.48144	4.44762
ASHGA5P027035	0.0184234	1.70309	up	noncoding	ENST00000449215	RP11-344F13.1	GENCODE	282	chr1	-	14548385	14549613		TTATTCATGACCTTCATCTACCTTCCCTTTCATCAAGTAAATGGAAATGTGTCATTCTGA	intergenic							164.014	96.2529	6.89908	6.13092	83.3571	489.773	218.628	217.649	83.3523	39.2914	23.0728	156.985	73.202	132.115	83.9273	205.972	68.163	56.9656	53.4255	7.59899	7.74291	6.38497	7.2146	6.1918	6.76591	6.47395	6.8195	6.28624
ASHGA5P047352	0.0184899	1.98077	up	noncoding	ENST00000418875	RP11-92J19.3	GENCODE	321	chr10	+	36727543	36731320		GGAATCTCCAGCAACTAGTGGGAATATTAATATTTTAAGATCCCATCTCTACCTTTAATG	intergenic							87.3707	54.8541	6.35282	5.36676	64.3173	173.086	134.892	91.4591	106.396	48.2405	31.143	49.4314	51.775	36.4365	60.7397	85.5718	70.5015	27.4176	51.5369	7.28323	6.22634	5.64062	5.94151	6.54049	7.06108	6.94057	5.18872	5.76846
ASHGA5P023836	0.0185063	1.86145	up	noncoding	HMlincRNA617+	HMlincRNA617	LincRNAs identified by Khalil et al	2718	chr8	+	49776604	49779322		AAGGTATTGTCTTGTGATCTCCTTTCCATCCTTGAGGCTTCGTAATTAAGCTCTGCGCTG	intergenic							338.472	185.827	7.97839	7.08197	209.104	1158.25	390.626	355.974	168.739	93.4213	73.5278	258.132	184.419	225.019	170.747	403.884	110.807	120.302	85.6079	8.6566	8.98327	7.26428	7.97172	7.22299	8.00917	8.17057	7.54853	7.64263
ASHGA5P016478	0.018688	1.89044	up	noncoding	ENST00000430772	FTX	GENCODE	708	chrX	-	73467698	73513362		GAACAGGTATCTCAGATTCCCAGTTCTCAATCTTCCTTCCTCCTTACAAGATACAAGCAA	intergenic							746.727	405.588	9.1377	8.21897	586.356	2301.57	746.641	940.309	416.005	179.684	142.817	660.435	382.657	545.513	363.351	896.543	209.066	252.752	189.236	9.79786	10.033	8.26147	9.46083	8.57121	8.94413	9.06635	8.96669	8.62356
ASHGA5P026653	0.0187208	1.79492	up	noncoding	TCONS_00012018	XLOC_005542	LincRNAs identified by Cabili et al	506	chr6	+	168152125	168152763		AGCCATTGTAAAGCAAGCTCCTAGTTCTAGTTCTCCCCCACAAATTTTATTGCTAAATAA	intergenic							4818.27	2778.1	11.9676	11.1237	4761.92	12020.3	4502.89	6388.2	3275.19	1993.19	1393.08	4211.41	3132.86	2547.6	3280.85	5662.24	1368.59	1900.41	1554.12	12.1402	12.6655	11.1668	12.5744	11.7668	11.8716	11.6866	11.8692	11.216
ASHGA5P025895	0.0187893	1.9963	up	noncoding	NR_046035	CXCL1	RefSeq	1207	chr4	+	74735108	74737019		GCCGGCGCGCAGCAGTCAGTGAGTCTCTTCTTCCCTAGGAGCGTCCGTGGCCACTGAACT	exon sense-overlapping	NM_001511	CXCL1	growth-regulated alpha protein precursor	+	74735108	74737019	69.3496	37.1361	5.74875	4.75142	37.1216	205.669	102.287	62.6381	74.1676	24.0899	11.3875	37.436	32.8635	13.7569	45.0773	71.2949	41.4454	23.5609	31.9536	6.65706	6.46631	5.21988	5.4044	6.01628	6.05379	5.38187	4.79041	5.05793
ASHGA5P041010	0.0188512	1.91546	up	noncoding	TCONS_00022001	XLOC_010601	LincRNAs identified by Cabili et al	1443	chr13	-	48464984	48466696		CAGTAGACAGAAGCAAAGCATATTCCCTCCTCTCAAAGAGTTCTACATGGTACACTGCAG	intergenic							315.28	175.426	7.9598	7.02211	377.586	872.115	351.819	324.4	215.862	90.1169	67.0682	223.27	140.167	229.018	189.339	349.208	106.838	94.3052	119.107	9.27586	8.56221	7.09552	7.82327	7.58261	7.9549	8.04965	7.33439	7.23331
ASHGA5P050670	0.0191343	1.81951	up	noncoding	ENST00000419808	AC093391.2	GENCODE	772	chr2	+	136742745	136774099		CAGGAATCTGACACCACTTACTCCTTGGGTAGAAACTCCCCCAAGTCTGAACTATGTGAT	natural antisense	NM_001349	DARS	aspartate--tRNA ligase, cytoplasmic	-	136664253	136743222	648.727	399.068	9.14437	8.28082	636.276	1544.9	774.169	793.568	380.765	294.927	223.815	541.396	444.724	429.959	445.663	706.213	226.805	288.543	251.569	9.8777	9.40046	8.31856	9.21088	8.43779	9.61226	9.65774	8.63956	8.81398
ASHGA5P035714	0.0192137	1.60006	up	noncoding	ENST00000404616	AC007249.3	GENCODE	494	chr2	+	10592444	10595678		AGAGGGAGAAGCATCTCTTCCTCTATGTCTCTTTTTATCTAAGAAACCAGTTTGACCAGC	intergenic							14.2029	7.3107	3.42081	2.74268	5	32.3804	21.4243	12.275	15.298	5	5.52461	16.721	5	5	7.2763	10.7812	8.98322	8.7937	5.34053	2.62964	3.87449	3.22967	3.29684	3.88948	2.57053	4.12398	3.75181	2.35685
ASHGA5P030027	0.0193283	2.15169	up	noncoding	uc021sle.1	DQ570035	UCSC_knowngene	716	chr15	-	51551890	51552606		TTCTGTGGCTTCTCCCCATCTGTCTAGCATTTCTCTCTACCTCTGAAGAATATCAGTCTG	intron sense-overlapping	NM_000103	CYP19A1	cytochrome P450 19A1	-	51500253	51630795	504.893	280.987	8.81171	7.70624	302.308	1163.52	666.175	600.869	200.744	365.257	244.965	495.302	381.642	411.187	268.897	438.138	145.186	136.521	185.336	9.03462	8.98856	8.06383	8.7557	7.47314	9.90982	9.76794	8.50004	8.61324
ASHGA5P030258	0.0194488	1.96781	up	noncoding	ENST00000558389	CTD-3065B20.2	GENCODE	474	chr15	-	91139071	91139679		ATTATACCCTATCATAAGAGATAGGGTCCCCTGAACACAAGAAGTCATCTCCCCTTCTGG	intronic antisense	NM_001042574	CRTC3	CREB-regulated transcription coactivator 3 isoform b	+	91073117	91188577	3915.79	2102.61	11.5941	10.6176	3077.32	9948.29	5446.4	4896.06	2003.37	1352.46	889.051	3713.38	2424.79	2609.06	2601.29	4196.2	852.23	1143.65	891.037	11.6276	12.3351	11.4736	12.0994	10.9518	11.4005	11.1996	11.6655	10.9075
ASHGA5P040183	0.0194919	1.8821	up	noncoding	ENST00000515789	RP11-768B22.2	GENCODE	2371	chr4	+	153587519	153591259		GAACTTGTATTTCCTTTGTTTTCCTTTCAAATGTCTCCCCAAAATGCTTGTAACTGTGTA	intronic antisense	NM_152680	TMEM154	transmembrane protein 154 precursor	-	153547265	153601317	2055.3	1225.41	10.7342	9.82182	1443.82	5264.01	2347.59	2491.67	1249.61	863.188	605.304	2177.18	1317.2	1601.14	1447.66	2469.75	515.765	685.173	541.189	10.7991	11.2638	10.0909	10.9607	10.2397	10.9004	10.7999	10.8187	10.1489
ASHGA5P056601	0.0195386	1.84529	up	noncoding	TCONS_00006527	XLOC_003152	LincRNAs identified by Cabili et al	318	chr3	-	66831271	66874793		TGCACCACAGGTAAAATGAACAATCGGTTATTCTCCCTTTCCTGGCAGAGGAGTTTCTTT	intergenic							908.876	514.485	9.48316	8.59931	780.904	2797.32	913.028	1007.31	570.787	246.165	246.185	709.303	410.803	700.882	545.26	1059.07	301.16	264.683	319.54	10.1447	10.3443	8.58267	9.56073	9.01599	9.3624	9.77371	9.08068	8.72366
ASHGA5P030995	0.0196226	1.79402	up	noncoding	ENST00000561676	RP11-457I16.2	GENCODE	536	chr16	-	18581776	18583005	ENST00000574883	TCCATGAACTCCACTCCCTGGAGTCCTTTGCTAAGAGCAATGGAAAAAGAAACCAGAGAG	intergenic							167.467	102.512	7.14908	6.30589	138.305	467.955	178.434	182.622	96.3497	80.9579	39.5746	155.54	103.271	130.331	98.1517	168.263	85.9827	72.8266	58.7562	8.19062	7.67494	6.07074	6.94715	6.40357	7.8062	7.29277	6.80668	6.79898
ASHGA5P048555	0.0196538	1.69215	up	noncoding	ENST00000424611	HERC2P3	GENCODE	1956	chr15	-	20643949	20658928	ENST00000436934, ENST00000454045, ENST00000530420, ENST00000564334, uc010uan.1, uc010uao.1	TCTGACGTGCCGTTACTCAGAGGTGGGTGGCCGTCTCCCTTCCCTGTACCCTGGTGAAGA	intergenic							11090.3	7234.19	13.1821	12.4232	16846.3	22727.2	10841.4	9022.15	8694.25	7194.79	6295.09	7101.23	15661.1	6335.81	7356.73	10988.2	4256.44	3141.49	2899.5	13.8262	13.7534	12.6002	13.1419	13.2544	13.1708	13.0057	12.7042	12.9373
ASHGA5P031909	0.0197654	2.02143	up	noncoding	ENST00000558618	RP5-991G20.2	GENCODE	498	chr16	+	72840886	72843538		GCTTCCCATTGGCTGCTAAAGTTCTCTTGATGCATCATCAATTATATATTCTTCATGACT	intronic antisense	NM_001164766	ZFHX3	zinc finger homeobox protein 3 isoform B	-	72816785	73092534	22.6496	9.87911	4.10526	3.08988	5.64527	19.9629	95.5673	18.3038	8.3612	14.8825	7.2272	11.2463	19.0997	8.92996	6.27163	15.66	6.77471	6.18362	6.23412	4.1867	3.30815	5.11265	3.742	3.21753	5.35853	4.60402	3.31248	4.23994
ASHGA5P045953	0.0198239	1.7294	up	noncoding	ENST00000561961	RP11-355O1.11	GENCODE	1994	chr9	+	125699901	125702605		ATACACACACACAGAAGGATATACTCTAAAGTATTAACATTGGCCCTGGGAATGCCATGG	intergenic							39.5334	29.5374	5.16167	4.3714	13.0362	103.66	51.8538	40.3038	32.7213	17.5613	19.3875	37.7434	9.56938	43.4239	18.8795	47.5039	39.0126	34.2968	14.0758	5.33835	5.47029	4.21613	4.77403	4.89081	5.59193	6.20682	4.80501	3.34075
ASHGA5P028451	0.0198801	1.50971	up	noncoding	NR_029383	PAN3-AS1	RefSeq	2211	chr13	-	28710979	28713311		ATTTTTAAATTCTGCCTCCACTCGCTCTCTCGCGCTCTGGTTCCTCCGAGTTGTTTATTC	natural antisense	NM_175854	PAN3	PAB-dependent poly(A)-specific ribonuclease subunit 3	+	28712642	28869475	251.848	192.735	7.8508	7.25653	199.901	467.875	363.257	291.993	241.28	81.9339	93.1898	275.356	166.365	229.427	193.815	308.044	183.748	131.314	136.43	8.61279	7.67314	7.14115	7.65755	7.75473	7.8259	8.49635	7.64482	7.48675
ASHGA5P030486	0.0201679	1.80395	up	noncoding	uc001zol.3	BC045779	UCSC_knowngene	1610	chr15	+	42100588	42102743		TTCCTATTCGCAGTCTCCAGGCTTGCTCTTGTCTGCTATTTCCAGTGCTAATGAAGAGTT	intron sense-overlapping	NM_001128608	MAPKBP1	mitogen-activated protein kinase-binding protein 1 isoform b	+	42066631	42120053	18.9914	12.9718	4.2636	3.41244	6.56313	27.9352	36.109	17.0455	12.0791	12.6762	11.7432	27.7798	12.7015	14.1187	10.8993	24.376	13.0519	5	10.655	4.39616	3.69299	3.78083	3.66294	3.62778	5.12509	5.42887	4.39413	3.6822
ASHGA5P041987	0.0202411	1.55236	up	noncoding	ENST00000422062	RP11-451O13.1	GENCODE	794	chr1	+	157899320	157912986		GCCATGTTCATTATGGTCTTCCTCTCTGCTACTGATATTCCTATTTTCTTTGGATTCCAG	intergenic							47.3861	34.9137	5.34929	4.71483	17.8832	124.733	70.5165	54.6832	40.8646	16.9773	15.5252	37.9058	36.1439	39.364	33.3556	60.1854	32.4777	22.3684	20.5009	5.75819	5.74267	4.65085	5.20266	5.20366	5.54992	5.87466	4.81168	5.20436
ASHGA5P056528	0.0203848	1.69752	up	noncoding	TCONS_00005360	XLOC_002543	LincRNAs identified by Cabili et al	715	chr2	-	241320859	241322761		AGGAACCGGTGAGAATATGTGGTCCCATACTTTTGCTTTCCTTTCCTACCTTCTCATCCT	intergenic							52.875	34.6024	5.44376	4.68032	18.1063	108.729	81.0789	102.4	35.4158	15.157	14.1126	47.9999	25.5939	42.4406	52.3733	50.8502	27.6102	19.8851	23.4632	5.7762	5.53753	4.87193	6.10976	4.99911	5.38318	5.72915	5.14319	4.67416
ASHGA5P021963	0.0203982	1.77462	up	noncoding	ENST00000545731	RP11-443D10.3	GENCODE	376	chr12	+	109551148	109563369		TTCTGAGAACCTGGCCTAATGATTCCTGTTTCCTCCCTTTTCAGTCATCATCCGTTTGCA	intron sense-overlapping	ENST00000338432	ACACB	acetyl-CoA carboxylase beta [Source:HGNC Symbol;Acc:85]	+	109554399	109706031	308.691	197.749	8.02614	7.19863	368.036	591.694	475.546	325.959	346.763	93.644	68.1171	199.769	125.586	141.493	220.872	453.266	163.345	144.16	135.523	9.2386	8.02451	7.54903	7.83351	8.31135	8.01158	8.0673	7.1732	7.07148
ASHGA5P020307	0.0204879	1.7367	up	noncoding	ENST00000511287	RP11-71E19.5	GENCODE	360	chr3	-	126111875	126113240		TACAGACCAGGGTACTGTTCCACGCACTTGACACCAATCCACCCATTTCACCTGCATGAT	bidirectional	NM_182628	CCDC37	coiled-coil domain-containing protein 37	+	126113781	126155398	25.7058	19.0853	4.61104	3.81469	10.5601	49.1524	43.0606	36.1369	23.0839	12.1913	10.9999	20.4613	6.2763	12.4495	21.1912	39.6904	19.4712	16.218	18.3005	5.05601	4.42725	3.97717	4.62229	4.40559	5.07054	5.33167	3.99776	2.85486
ASHGA5P052968	0.0205209	1.68193	up	noncoding	ENST00000403974	PMS2CL	pseudogene	1529	chr7	+	6774935	6791023	uc003squ.3	TGCCTCAGCCAACTAATCTCACATCCCCAAACACAAAAGTGTTTTAAGAAAGAAGAAATT								48.9092	33.5107	5.35978	4.60966	23.105	128.717	56.319	59.7909	34.1239	17.471	11.0931	60.6539	30.2809	52.563	32.357	58.2885	20.3282	23.0981	17.6594	6.07584	5.78945	4.32951	5.33367	4.94994	5.58345	5.34327	5.47312	4.93607
ASHGA5P027218	0.0205812	1.83725	up	noncoding	BF803219		LincRNAs identified by Khalil et al	175	chr8	+	90226145	90226296		AAGCCCTTCATGATCCTAGCTGTGATTTTCTTGCTCCCCCTTGCTATATTTATTCTGGGC	intergenic							1936.89	1130.76	10.6991	9.82153	3093.54	3566.61	2126.64	2007.37	1058.6	998.036	917.523	1726.77	1121.49	1491.99	1543.09	1683.24	690.263	582.524	802.708	11.6423	10.6678	9.92374	10.6065	9.99347	11.0649	11.2387	10.4552	9.95808
ASHGA5P000292	0.0206225	1.96342	up	noncoding	chr15:35840950-35861750+	chr15:35840950-35861750	LincRNAs identified by Khalil et al	20800	chr15	+	38053658	38074458		CTTCTAAGCTTTTTCTACATTAAATCCAGATACTCAATCTTCTCCCAGTGATTGAAGGAT	intergenic							53.879	33.8883	5.59174	4.61838	20.9388	146.951	71.4514	61.9156	33.2568	41.1487	20.9152	34.4544	40.6542	33.4963	27.4993	71.7831	22.8266	22.2016	18.7569	5.95383	5.98032	4.67148	5.38242	4.91191	6.83099	6.32582	4.67717	5.3914
ASHGA5P038611	0.0206621	2.19811	up	noncoding	ENST00000444379	RP11-132N15.2	GENCODE	1008	chr3	-	187719487	187721194		CCCTGTCTATGAAGGACAAATCTCCCTTTTCATTCTGGAGTGCAGTAGCCAAAATCTGTG	intergenic							889.293	508.908	9.56667	8.43041	531.871	2420.69	1131.79	1071.98	466.781	381.854	394.692	714.685	719.802	565.282	577.639	1101.46	189.675	229.657	178.837	9.68026	10.1142	8.95262	9.64742	8.72455	9.96171	10.3544	9.09815	9.41321
ASHGA5P043614	0.0207405	1.58932	up	noncoding	NR_038864	LOC401324	RefSeq	3629	chr7	+	35353465	35416086		CAAGCCACTAATGCTTCTCCATTTACTTCCTGTCTTCTGAAAATTCATTAAAACTTCTTG	intergenic							33.3168	26.7951	4.98493	4.31652	16.3999	58.8546	40.1625	49.0128	44.6557	13.1399	12.4395	31.8693	16.4696	23.0926	25.6186	48.3076	34.9143	22.061	17.1018	5.64409	4.68139	3.90189	5.04934	5.3185	5.17769	5.52659	4.57993	4.01933
ASHGA5P041264	0.0207424	1.78655	up	noncoding	ENST00000504578	RP11-155G15.2	GENCODE	893	chr5	+	96519302	96772921		TATATTTTTTGCATATTCATTTCTTTTCCATCCCTGTCCTGGAAGCCCTGACTACCTGAC	exon sense-overlapping	ENST00000509481	CTD-2215E18.1	Uncharacterized protein [Source:UniProtKB/TrEMBL;Acc:D6RF79]	+	96424778	96519354	93.0632	68.2261	6.46393	5.62675	54.7415	170.095	138.5	119.403	114.6	47.927	37.184	62.055	30.346	50.8867	76.1811	141.105	79.6474	53.3334	46.0833	7.09552	6.20235	5.6769	6.32524	6.65334	7.05313	7.19976	5.50516	4.9388
ASHGA5P015650	0.0207901	2.74699	up	noncoding	ENST00000422212	RP13-492C18.2	pseudogene	1621	chr7	-	56489549	56500395		CGCTACAGTTTGAGAATGACCTTAAAAGAAGAAGAAAAGGGAAGAAATGCTGATATATTG								24.6651	8.78397	4.46073	3.00288	37.8774	20.7568	58.4951	6.83565	41.6696	12.3198	9.71059	9.65569	10.4851	5	11.9182	5	5.92055	18.0861	5.07794	6.67975	3.3515	4.38431	2.69048	5.22931	5.08682	5.12046	3.14323	3.44727
ASHGA5P047328	0.0208915	1.91523	up	noncoding	BF352896R		LincRNAs identified by Khalil et al	268	chr2	+	207244079	207244335		TCCCTTGATCCTGGGTGTCCATATGCAACTGTATTTAGCATAGAAAGTCTTGGAGTTTGC	intergenic							19.5595	13.9011	4.41639	3.47887	10.1548	29.6883	23.9408	23.548	19.8498	12.602	13.847	22.8451	20.6276	18.1433	11.4429	20.1822	9.43268	9.56822	7.9106	5.00273	3.76478	3.34938	4.03821	4.22094	5.11679	5.70265	4.13564	4.35477
ASHGA5P027416	0.0209981	1.84019	up	noncoding	ENST00000553141	RP11-611O2.5	GENCODE	785	chr12	-	69235067	69237017		TTACTCCCATCCCTTACTATGGTTTATACAAAAGAGGCTGGAGAATAAGTACATTTTTAC	natural antisense	NM_002392	MDM2	E3 ubiquitin-protein ligase Mdm2 isoform MDM2	+	69201970	69239320	441.597	283.458	8.61085	7.73099	297.722	1126.47	472.201	526.995	262.05	206.366	202.337	438.633	300.857	374.576	268.986	548.442	188.33	165.095	137.917	9.02103	8.94099	7.54025	8.53028	7.87696	9.14226	9.51334	8.32165	8.315
ASHGA5P057870	0.0210661	1.85863	up	noncoding	TCONS_00022869	XLOC_011119	LincRNAs identified by Cabili et al	271	chr14	-	99751686	99763570	TCONS_00023170	TGTTTCCCAGGGTCATTGTGCATTTTTGTTGACTATTGATTCTCCCCTTCATTCAACAAC	intergenic							1350.07	763.617	10.0757	9.1815	892.381	3160.12	2039.76	1600.06	482.847	479.701	364.824	1780.87	821.315	1309.79	778.376	1188.7	372.688	432.351	442.099	10.2765	10.5045	9.83856	10.2655	8.77715	10.2036	10.2467	10.4934	9.5788
ASHGA5P020983	0.0210675	1.92165	up	noncoding	ENST00000523050	CTC-353G13.1	GENCODE	663	chr5	-	167364721	167380474		GAGATCATTTTCAAACTCTTCCCTCCTCACCCAAAATACATGAAAAGCCCTTCTGTAAAG	intronic antisense	NM_001122679	ODZ2	teneurin-2	+	166711842	167691162	3221.86	1919.48	11.4205	10.4782	4925.79	6342.5	3322.96	2944.66	2680.94	1458.14	1719.53	2380.34	3158.76	2085.4	2368.08	3039.57	939.678	666.188	1178.67	12.1848	11.5343	10.673	11.2263	11.423	11.4894	11.8638	10.9694	11.2284
ASHGA5P038425	0.0210854	2.04265	up	noncoding	ENST00000513940	RP11-265F19.1	GENCODE	671	chr3	-	130772203	130791179	ENST00000511339	TGATCTCTCATCCCATTGGCCCTTCTAATAGAGCTATTGGCATTCACATCCTATTTTCAG	intronic antisense	NM_001146003	NEK11	serine/threonine-protein kinase Nek11 isoform 3	+	130745693	131069309	318.854	189.486	8.18735	7.15691	403.038	706.328	345.597	324.552	221.067	160.001	145.563	244.686	227.609	265.357	186.376	312.249	122.968	95.676	116.164	9.3524	8.28725	7.07202	7.82443	7.61238	8.78871	9.09682	7.46478	7.92975
ASHGA5P043543	0.0211977	1.75456	up	noncoding	ENST00000439446	AC005083.1	GENCODE	676	chr7	+	20259061	20261323		TAGTTCTTAACCACTGATCTCCTCCCTCAGGGAAGGGAATTCTTTCCACAGTTGCTAGTT	intergenic							237.654	151.136	7.69068	6.87957	209.191	606.161	279.544	255.721	144.483	98.8023	68.6531	238.678	152.513	190.403	179.514	225.006	115.74	107.602	87.1744	8.65712	8.05299	6.75381	7.4653	6.99854	8.08916	8.07935	7.42918	7.35621
ASHGA5P033212	0.0212026	1.99315	up	noncoding	ENST00000511627	RP1-117B12.4	GENCODE	715	chr17	+	48473798	48475249		CCTGTCCTCTACTTAACCCCCGAATAACCATCATGGGGAAAACTCTTCTTCCTGAATTTC	natural antisense	NM_018509	LRRC59	leucine-rich repeat-containing protein 59	-	48458593	48474914	54.5409	30.7086	5.50617	4.51112	36.5883	147.847	86.238	40.1795	21.6366	22.9757	14.4463	66.4157	36.214	41.7955	29.0978	46.2276	23.617	14.0931	23.915	6.63669	5.99177	4.96174	4.77049	4.32996	5.98825	5.76634	5.60412	5.20813
ASHGA5P033988	0.0212807	1.75786	up	noncoding	ENST00000419160	RP4-669L17.10	GENCODE	547	chr1	+	322731	324955		ACTGTGAGTCATGGTGAATGGACATTCTCCTTACCCTTGATGTAAATTGACAGGGTTTTG	intergenic							25.2308	13.8728	4.31181	3.49799	13.3663	78.2966	35.9729	31.7343	7.32511	10.2898	5.08519	19.7766	16.3695	14.244	10.0074	23.5177	10.9913	12.6621	9.31744	5.37456	5.07789	3.77648	4.43857	3.07732	4.81539	3.98144	3.95284	4.0093
ASHGA5P023561	0.0212969	1.69893	up	noncoding	ENST00000584169	LINC00334	GENCODE	589	chr21	+	46654254	46677182		GGACTCGAGGGGCTATTTTAAAATATTTTCTGTTTCCTTGATTTCTCCTCCTTTGGATGT	intergenic							137.378	85.7208	6.81327	6.04865	103.213	393.378	163.88	159.35	98.0961	44.3342	30.7146	106.058	66.4246	103.927	93.81	147.497	61.1795	61.9404	65.2664	7.84198	7.42092	5.94066	6.75381	6.42739	6.93508	6.92142	6.26493	6.14347
ASHGA5P039760	0.0213939	1.70213	up	noncoding	uc001ebz.3	DKFZp547A023	UCSC_knowngene	1446	chr1	+	112999439	113006065		GAAAATCAGCTTGACCAAAGTCACAGCTCCTTCCCTGGACAGCTCATATATTAATACAAA	exon sense-overlapping	NM_018704	CTTNBP2NL	CTTNBP2 N-terminal-like protein	+	112938799	113003786	384.872	244.442	8.29573	7.52839	416.479	961.477	487.869	397.774	232.277	99.248	103.314	380.538	216.476	422.611	199.928	413.375	165.298	146.96	146.45	9.38496	8.71918	7.59495	8.12307	7.69468	8.09707	8.62979	8.12213	7.85405
ASHGA5P037871	0.0214131	1.80887	up	noncoding	ENST00000420391	CTA-796E4.3	GENCODE	188	chr22	+	26557799	26560269		GCTCACTTTGTATTCTGTAAACTTTCAGTTGGAAAATAAACACACTGTCTCCCTGTCAAA	intergenic							65.859	44.2539	5.87747	5.02238	25.5991	168.817	101.242	75.364	43.5215	43.1954	23.6854	45.448	41.9872	42.3002	46.8899	93.5137	30.8932	29.2116	24.9813	6.1977	6.19042	5.20027	5.66633	5.28912	6.90036	6.51219	5.06335	5.44433
ASHGA5P038558	0.0215514	1.64973	up	noncoding	TCONS_00023478	XLOC_011326	LincRNAs identified by Cabili et al	296	chr15	+	79709124	79709673		TGGAAAATCTCTACCTTCCCAGGGATTTGTGAAGTTTTCTTTTAGGCAGACAGCTGCCAG	intergenic							59.0376	38.9815	5.60608	4.88385	37.3112	166.248	75.6861	68.2428	36.0862	17.9089	13.7068	57.1106	36.0833	49.5399	38.137	66.8257	30.7124	28.5782	22.9937	6.66429	6.17038	4.75803	5.52513	5.0263	5.6239	5.68835	5.39225	5.20165
ASHGA5P032529	0.0216071	1.93846	up	noncoding	ENST00000504307	HILS1	GENCODE	1219	chr17	-	48248788	48258539		GCCCCATCTCCTGGCAGGATTTTCTATCACCGGAATACAGTAGATTTTCCCTCCTTTTTT	intronic antisense	NM_000023	SGCA	alpha-sarcoglycan isoform 1 precursor	+	48243365	48253293	499.037	270.991	8.5376	7.58269	377.174	1576.78	584.403	572.308	264.639	132.318	90.4904	394.18	280.216	347.837	272.257	603.98	126.379	148.869	117.399	9.27334	9.42962	7.86083	8.67409	7.88903	8.53926	8.46049	8.17415	8.21949
ASHGA5P050505	0.0216694	1.57373	up	noncoding	ENST00000366234	PCBP1-AS1	GENCODE	884	chr2	-	70258564	70314132	ENST00000413069, ENST00000415742, ENST00000420309, ENST00000423402, ENST00000429599, ENST00000432604, ENST00000439892, ENST00000458686	CATGACTCGCCTCCTCTCAGTGACCACAGGTTGGTTGAGGGGTTTAACAAGGCTAAGAAG	bidirectional	NM_006196	PCBP1	poly(rC)-binding protein 1	+	70314584	70316334	77.3136	57.0816	6.10707	5.45289	72.7406	156.983	129.132	70.4301	60.9303	24.7767	23.4955	80.0203	47.8271	74.3284	46.6864	93.1884	55.095	47.7685	34.6775	7.4321	6.07989	5.57407	5.57093	5.73801	6.09314	6.50004	5.86837	5.63288
ASHGA5P042212	0.0217015	1.84198	up	noncoding	uc003mue.3	AY927512	UCSC_knowngene	650	chr6	+	2884221	2900910		TCTTGCAAATTTCTGTTGATGCCCTCCCTGAGCTGTTGGTACAGAAACAACTTGAAACAG	natural antisense	NM_004155	SERPINB9	serpin B9	-	2887499	2903546	796.264	478.265	9.34882	8.46756	1147.42	1815.51	979.358	771.975	658.476	219.14	208	570.231	410.857	782.055	526.734	871.554	328.585	223.745	204.322	10.5472	9.64312	8.70203	9.17033	9.2416	9.21562	9.54699	8.72366	8.72455
ASHGA5P040041	0.0217861	2.16965	up	noncoding	ENST00000583654	RP11-571L19.7	GENCODE	622	chr4	+	99850047	99916145		GGATCAGCACAATTCTCCCCTATTTACTGCTGAAGCAATCAACTGGGATTATACAAAAAA	intronic antisense	NM_001130679	EIF4E	eukaryotic translation initiation factor 4E isoform 2	-	99799606	99851786	636.459	367.885	9.10875	7.99129	455.399	1683.46	729.698	697.726	332.749	300.203	259.223	633.211	479.179	472.021	435.131	722.586	134.234	198.371	133.673	9.49442	9.52563	8.21949	9.00544	8.25042	9.63561	9.84634	8.89268	8.89957
ASHGA5P037373	0.0218476	1.98902	up	noncoding	TCONS_00024464	XLOC_011786	LincRNAs identified by Cabili et al	503	chr16	+	73804648	73809182		GCACAATAAATACCATTATGTGTTAGACGGATGGATGGATCACTTTTCTCCCCTTGCAAG	intergenic							644.008	338.142	8.88454	7.89249	343.817	1997.75	821.234	808.353	311.969	182.006	99.6667	587.265	360.766	433.435	369.232	734.797	136.496	205.37	126.902	9.1734	9.78467	8.41435	9.23643	8.15017	8.96738	8.58341	8.76654	8.54723
ASHGA5P054919	0.0218919	1.75634	up	noncoding	ENST00000541416	SNHG1	GENCODE	996	chr11	-	62621551	62623284		TTCTAGATAGATGCCCACTGATATATGCCCCTTTTTTCTCAGATAGATGCCCACTGATCT	bidirectional	NM_001012662	SLC3A2	4F2 cell-surface antigen heavy chain isoform b	+	62623483	62656355	46.1955	32.7805	5.41596	4.60339	32.2287	88.4339	72.9707	53.139	39.8419	12.2283	19.9382	50.7837	15.704	43.5572	41.9463	50.8868	27.1762	24.7303	25.4629	6.48482	5.25596	4.70123	5.16095	5.1698	5.07646	6.2485	5.22994	3.95982
ASHGA5P057882	0.0219512	1.85835	up	noncoding	TCONS_00023170	XLOC_011119	LincRNAs identified by Cabili et al	913	chr14	-	99750983	99752177	TCONS_00022869	ACATTCACAGGGTCATTGTGCATTTTTGTTGACTATTGATTCTCCCCTTCATTCAACAAC	intergenic							2237.22	1215.84	10.7347	9.84069	1748.45	6438.54	2580.77	2724.21	1058.16	674.988	464.073	2208.57	1276.09	1634.27	1358.58	2398.88	536.67	688.048	618.356	10.9848	11.5713	10.2621	11.0906	9.99217	10.61	10.531	10.8357	10.1062
ASHGA5P046345	0.0219788	1.75968	up	noncoding	ENST00000416873	RP11-85L21.6	GENCODE	250	chrX	-	134257166	134257532		AAGGATTTATTGATCCACACCATTTTCTTGGATTTTCTATCCTCCCCAGGGGGCAGAGGT	intergenic							117.496	73.6713	6.65167	5.83635	123.275	264.358	175.851	107.279	59.2878	37.8313	32.9149	139.173	70.433	123.796	62.0487	92.2739	59.3729	54.0096	53.7654	8.04702	6.85345	6.04931	6.17619	5.70132	6.71101	7.01835	6.65667	6.22461
ASHGA5P035849	0.0219859	1.77559	up	noncoding	ENST00000454137	AC006509.6	GENCODE	725	chr2	+	47922954	47984932		TATCTTTAGGACTTTTCCTAATCTCACCTTCTCCATCTGTGAAATGGAAATAATCAAAGG	intergenic							44.9237	31.025	5.32269	4.49439	21.8564	122.922	50.9329	54.5107	31.1988	17.0044	17.9595	43.005	35.5161	38.8616	26.2912	60.3233	19.8329	22.0239	14.3259	6.01021	5.71803	4.19394	5.19763	4.81802	5.55148	6.10559	4.9866	5.17847
ASHGA5P043411	0.0221452	1.83717	up	noncoding	TCONS_00018230	XLOC_008510	LincRNAs identified by Cabili et al	2253	chr10	+	73134944	73141151		ATAAGCTGACATTTAGGAAGAACACAGACGGCTGTCTCCCCTGAAAGCCAAACAGATACT	intergenic							124.465	79.4678	6.76179	5.88431	75.215	336.218	160.464	132.515	64.3884	54.9814	43.991	127.945	81.4042	101.917	78.5392	152.466	44.7474	52.928	44.2738	7.47104	7.19976	5.90728	6.48733	5.81539	7.24972	7.43354	6.53024	6.45488
ASHGA5P018265	0.0224115	1.7423	up	noncoding	ENST00000451392	LINC00607	GENCODE	581	chr2	-	216506490	216696313		GAAAAAGAAGGTCTGCCCATCCACATCATTTTGGCTGAATGCGTGACCTATCCAATCCTT	intergenic							33.3356	22.726	4.91101	4.11002	15.3576	47.5241	39.1832	34.8002	70.0329	11.4569	9.91982	38.4103	14.446	30.134	24.3888	36.1951	18.6849	15.1508	20.0828	5.56394	4.3797	3.87215	4.57214	5.93545	4.98493	5.15058	4.82919	3.84097
ASHGA5P034152	0.0225826	1.81997	up	noncoding	TCONS_00016899	XLOC_007895	LincRNAs identified by Cabili et al	650	chr9	-	139151964	139157976	TCONS_00016506	TTTCTATATCCACTTGCACGGGCTGTCAACATTGGCAGTGATGTTGCCACCTCCCCCCAG	intergenic							397.029	232.52	8.35989	7.49598	574.818	980.938	447.07	373.196	280.17	137.355	103.19	279.498	176.567	277.959	263.625	419.432	167.323	156.94	165.791	9.76958	8.75662	7.46612	8.03328	7.97537	8.58747	8.62782	7.6629	7.56906
ASHGA5P058177	0.0227204	2.06188	up	noncoding	TCONS_00027378	XLOC_013360	LincRNAs identified by Cabili et al	399	chr19	-	45456827	45457419		TTATGAACCTTATATATTACCTGGAAAAAGAGGATGGGTGTGTCTCCCCAACTGGGCAGG	intergenic							580.445	307.082	8.78266	7.7387	328.581	1824.44	817.952	663.999	248.188	197.342	129.969	433.088	351.729	326.316	350.187	701.959	115.83	165.193	138.363	9.13224	9.64976	8.40875	8.93473	7.79782	9.08454	8.95262	8.30081	8.51431
ASHGA5P031152	0.0228161	1.66982	up	noncoding	ENST00000570024	AC140542.2	GENCODE	1325	chr16	-	47883224	47921041		TTCTGTCCTTCTCTCCTTTTAGATTGTAAGCTACCCAAAGTCCATCTCCATGGGTTTTTT	intergenic							116.653	89.5829	6.81297	6.07327	64.2195	198.056	200.726	133.249	113.773	57.5382	55.9525	109.708	92.59	91.0216	84.4865	176.028	77.0998	49.7591	56.0949	7.28097	6.41684	6.25731	6.49453	6.64187	7.31891	7.78444	6.30888	6.64648
ASHGA5P000218	0.022855	1.83158	up	noncoding	chr11:8260275-8275625+	chr11:8260275-8275625	LincRNAs identified by Khalil et al	15350	chr11	+	8303699	8319049		GCATTATCACCCCCATCCATTCTTCCTAATCTAAAGAAGAGAAGGCCAAAGTGGACAACA	intergenic							100.846	66.2306	6.53666	5.66358	60.6013	239.371	138.751	115.49	57.8805	45.6246	49.4282	99.618	62.8476	96.6301	72.9365	97.0081	43.7402	41.3498	49.102	7.20773	6.69428	5.68023	6.27689	5.66507	6.97626	7.61776	6.17509	6.06305
ASHGA5P040276	0.0229235	1.92478	up	noncoding	ENST00000502419	RP11-366H4.1	GENCODE	677	chr4	+	189081218	189082293		GGCACTGAAGCTAATAATGTAACTTTTCTCCCTTCTTTCTTCTTTGGCATAGATTTAAAG	intergenic							598.417	315.74	8.75018	7.80549	305.564	2012.65	641.334	735.605	248.533	142.706	123.717	577.22	322.523	464.169	267.899	686.909	151.808	184.768	132.101	9.04727	9.80124	8.00195	9.08454	7.80097	8.63833	8.88953	8.73761	8.40185
ASHGA5P032848	0.0230009	1.58499	up	noncoding	ENST00000582334	RP11-963H4.5	GENCODE	575	chr17	+	10695375	10698302		AATTTTTCAGAGTGATTTTGATTACATGCAACTTTTCCTTCCCTGTGAACTTTAGAACCC	intergenic							74.4634	53.0935	5.89187	5.22739	27.8522	165.625	125.975	99.7812	64.9007	20.1782	12.9345	78.4612	24.6583	72.6984	60.0277	100.304	47.4727	25.8039	40.6893	6.302	6.1661	5.53512	6.07231	5.82754	5.79477	5.59534	5.84175	4.62071
ASHGA5P047484	0.0231736	1.97477	up	noncoding	ENST00000441348	RP11-472G21.2	GENCODE	525	chr10	+	73638113	73638865		GGCTGTGCAGCCAAAATTTGCAATTCTTCCCCCAGCTTTTAAAATTGTAGTAAAATATAT	intergenic							203.897	121.923	7.52853	6.54685	165.78	425.889	305.781	248.524	85.9358	106.996	78.3932	213.878	143.423	169.709	142.343	161.758	70.5025	68.3153	97.4089	8.39894	7.54226	6.89688	7.42193	6.23785	8.21024	8.2517	7.26842	7.26253
ASHGA5P046130	0.0232098	1.93091	up	noncoding	NR_024440	LOC729609	RefSeq	628	chrX	-	20004934	20007897		TTCTACTTTAGATCCCTAATGCCAGGCAAATAGTCCCTCCTTATTAAGAATAAATGTACT	intergenic							298.376	168.877	7.94116	6.99187	485.781	671.189	350.431	292.332	221.152	83.5679	85.7792	196.774	155.356	209.778	184.338	313.44	117.47	93.545	108.21	9.57325	8.20951	7.09218	7.66037	7.61383	7.85243	8.37602	7.15167	7.38216
ASHGA5P058694	0.023235	2.01082	up	noncoding	uc.30+	uc.30	UCR	243	chr1	+	88028999	88029242		TGTTCGTCTGTTCAACTTCTGACAGGGATGGAAGAAAATCTAAATTATTCCCTCCTGCAA	intergenic							159.716	78.1917	6.81421	5.80642	134.177	537.511	169.585	182.999	88.2752	34.015	22.1032	109.066	76.4398	97.7821	78.906	168.574	41.1769	47.3522	37.1106	8.15517	7.88047	5.99583	6.95136	6.2755	6.54731	6.40742	6.30058	6.36366
ASHGA5P023351	0.0236787	2.47004	up	noncoding	ENST00000579095	RP13-20L14.6	GENCODE	357	chr17	-	80412148	80416397	chrX:137166825-137196100-	TTGTGTTTGTTCTCCCTCTGTTGCCGAGGCTGGACTGTACTGCCGTGATCTCGGCTTGCT	natural antisense	NM_001038618	NARF	nuclear prelamin A recognition factor isoform c	+	80416059	80446143	657.847	333.947	9.06543	7.7609	281.212	2063.54	726.11	748.161	269.949	416.39	332.366	425.049	514.635	369.118	326.005	758.258	131.03	139.701	98.8846	8.9582	9.83794	8.20951	9.11503	7.91932	10.06	10.1447	8.27877	8.99419
ASHGA5P021499	0.0236851	1.71305	up	noncoding	ENST00000533590	RP11-535A19.2	GENCODE	572	chr11	-	75514506	75525618		TTTGAGCTATGTATCCCAAGAGCCCTCTTTCTTCCATTCACTTACCTGTCTAGTCAAACA	bidirectional	NM_003369	UVRAG	UV radiation resistance-associated gene protein	+	75526211	75855282	73.592	53.0449	6.11204	5.33547	54.9062	134.909	103.779	86.7586	84.0603	21.1529	35.1036	68.0673	35.1861	45.876	58.6873	98.9538	51.2672	38.9109	42.4332	7.10004	5.85538	5.2424	5.86754	6.20682	5.86662	7.1143	5.64325	5.16386
ASHGA5P015098	0.0238366	1.54729	up	noncoding	ENST00000416630	AC005041.9	GENCODE	584	chr2	+	74612612	74614153		GCAGGAAAAGTTATTTCAAGCTTCCTTTACATTTTCAAGTCCTTACTCCCACCCAAGCCA	intronic antisense	NM_001190836	DCTN1	dynactin subunit 1 isoform 5	-	74588280	74619214	45.6869	35.4388	5.40987	4.78013	21.2568	99.3856	70.5471	55.927	32.8023	21.0018	19.2486	45.3261	38.4518	50.7098	27.9332	46.4863	32.2777	27.6281	24.585	5.97154	5.41329	4.65188	5.23745	4.89425	5.85596	6.19573	5.05885	5.3033
ASHGA5P025987	0.0239093	1.52073	up	noncoding	NR_047692	PIGT	RefSeq	2149	chr20	+	44044706	44054885		AAGCTCTTGCCCTGTAGTTCCAAGGGCTTCTCTTATCTCTTTCCATCTCCTCCAGGCAGG	exon sense-overlapping	NM_001184728	PIGT	GPI transamidase component PIG-T isoform 2 precursor	+	44044706	44054885	84.5485	63.3075	6.24613	5.64136	43.7667	171.643	142.45	96.8677	65.4645	37.4883	23.9676	94.7403	64.7436	95.5313	58.4967	69.5172	49.1939	48.5105	57.1589	6.84148	6.21889	5.71752	6.02873	5.84002	6.6935	6.53058	6.09829	6.10819
ASHGA5P048589	0.0239267	1.87518	up	noncoding	ENST00000530420	HERC2P9	GENCODE	2257	chr15	+	28896566	28919061	ENST00000424611, uc001yvo.4, uc001yvp.4, uc010uan.1, uc010uao.1	TGAAGAGCGGTGCAGCAGCTTCTCCCCTGGTTTCCTCCTCAGAGTCCATGCTGAGGTGGC	intergenic							444.236	283.314	8.6346	7.72757	508.027	996.039	617.737	406.315	330.677	206.999	183.368	304.725	302.365	311.968	308.613	569.45	180.67	158.394	151.742	9.62695	8.78312	7.94636	8.15517	8.23916	9.14667	9.39361	7.78577	8.32269
ASHGA5P021180	0.0241618	1.82018	up	noncoding	ENST00000527092	CTD-3074O7.5	GENCODE	828	chr11	-	66240960	66247702		ACAGTATGTCTGTGTGTGCCTTGATCGCATCACCCCCTGGACCTCCAGTGACCGAGATCT	natural antisense	NM_001098510	PELI3	E3 ubiquitin-protein ligase pellino homolog 3 isoform 2	+	66234335	66244808	179.056	110.939	7.19633	6.33224	231.407	356.317	301.23	157.351	192.169	36.7632	46.6662	110.543	55.1852	116.003	103.993	255.74	90.2778	80.6084	74.7669	8.75865	7.28097	6.87173	6.73866	7.4127	6.66429	7.52285	6.32076	5.86335
ASHGA5P023725	0.0242952	2.16718	up	noncoding	HMlincRNA1607-	HMlincRNA1607	LincRNAs identified by Khalil et al	4938	chrX	-	44348754	44353692		CTCATCTCCACTTTCCATGTCATACACATACCTGAGAACAAAAATAGAAGGAAAGCAAAG	intergenic							30.1295	18.6025	4.92765	3.81183	12.079	70.7952	28.4379	25.313	23.4545	25.2882	21.7449	33.923	29.8976	20.6771	15.2351	29.6536	14.3329	10.134	10.2869	5.23425	4.93302	3.52646	4.1359	4.42701	6.12218	6.38367	4.65873	4.92138
ASHGA5P033915	0.024298	1.75448	up	noncoding	ENST00000577382	RP11-100K18.1	GENCODE	2727	chr18	+	75897222	75900887		ACAATAGCCTTCCTCCCAAGACTGTGGAATAAATAAGAGACACATCGCTCCAAAACATTT	intergenic							1317.37	804.893	10.0562	9.2452	1398.76	3545.25	1289.8	1523.36	871.328	464.214	307.537	1138.69	932.646	1164.25	783.73	1478.17	489.217	438.725	347.513	10.7572	10.6642	9.14226	10.1837	9.68417	10.1708	10.0464	9.80124	9.745
ASHGA5P018797	0.0243549	1.86716	up	noncoding	ENST00000457756	AC073636.1	GENCODE	558	chr2	-	177710783	177714131		TAGCATCTTTCAAAAGTCACTTATTGGTATCTCCTCCAGTCCCAGAAGGAGGAGTTGAGG	intergenic							115.911	74.674	6.7205	5.81965	91.3041	285.898	154.809	133.353	71.111	59.6815	43.1718	87.9626	73.9738	78.6303	79.5488	143.404	43.0451	59.4334	44.6827	7.70551	6.96669	5.85121	6.49554	5.95754	7.37115	7.41053	6.00584	6.3074
ASHGA5P035424	0.0244039	1.90307	up	noncoding	TCONS_00004225	XLOC_002067	LincRNAs identified by Cabili et al	942	chr2	-	43199537	43228604		ATTTGCGTTCTCTCCTCTGCAAGTACAGGATCTCGTTTGATTCTCAAAACCACCCTAGAG	intergenic							42.1388	28.8452	5.39772	4.46939	21.2255	87.7376	63.3174	41.8388	32.0172	30.6838	29.0491	31.241	31.6939	31.7353	23.0365	45.6848	28.3294	20.7664	20.6699	5.96989	5.24313	4.49081	4.8273	4.85781	6.40357	6.83737	4.55189	5.00137
ASHGA5P041881	0.0244757	1.88917	up	noncoding	TCONS_00020445	XLOC_009777	LincRNAs identified by Cabili et al	1279	chr12	+	57480962	57482632		TACTTGTGCGTGGTTGTGAAACTCCTCTCTCAGCTCGGAGGGGTGGGGGAGAGAAGGAAT	intergenic							37.9155	24.7682	5.19953	4.28177	20.1516	91.9794	48.7874	43.5234	27.814	20.4991	24.4129	26.1566	28.4945	20.1228	24.9705	38.5015	21.4556	21.8988	17.9339	5.90864	5.30914	4.13443	4.88681	4.66275	5.81808	6.56333	4.31307	4.84872
ASHGA5P057550	0.0244969	1.91208	up	noncoding	TCONS_00018732	XLOC_008486	LincRNAs identified by Cabili et al	1100	chr10	+	58058948	58073281		TGTCAACTCACTGACTGAATTCAATCCCTGGAGTTCTAAGAGAAATCTCACTCCAAGAAA	intergenic							25.5525	14.7273	4.48952	3.55437	13.9735	81.9489	29.1875	28.5672	9.36787	16.4492	8.58611	16.3398	19.2904	12.0366	12.7812	26.7105	10.8951	14.0653	7.31201	5.43321	5.14339	3.55598	4.29682	3.34211	5.50252	4.91372	3.72839	4.25455
ASHGA5P038855	0.0244993	1.74221	up	noncoding	ENST00000470447	ADAMTS9-AS1	GENCODE	891	chr3	+	64547021	64569416	ENST00000480831	AGACAGACGTAGGAATTGCTTAAAAACAAGAAGTTCTCCCACCCTTGTTGGAGCGAATGC	natural antisense	NM_182920	ADAMTS9	A disintegrin and metalloproteinase with thrombospondin motifs 9 preproprotein	-	64501330	64673365	828.45	474.713	9.29076	8.48983	406.078	2653.83	958.841	1042.69	364.528	260.868	186.504	754.259	448.974	633.163	451.796	959.493	277.585	323.737	228.243	9.35789	10.2633	8.66386	9.61068	8.38477	9.44538	9.41923	9.18093	8.82423
ASHGA5P027822	0.0245628	2.2279	up	noncoding	ENST00000545258	RP11-290C10.1	GENCODE	719	chr12	+	10019625	10022407		GGAAACTTCATATAACCTTGGAAGAAATCTCTCACTCTCAATACCACCAAATGACAGAAA	natural antisense	NM_005127	CLEC2B	C-type lectin domain family 2 member B	-	10004967	10022458	20.5848	11.6507	4.42057	3.26488	11.7026	44.2563	23.4836	20.4038	6.98792	22.9431	12.9075	21.9932	15.5718	22.4462	8.47673	14.1488	7.49163	5.91153	7.50825	5.19723	4.27777	3.32914	3.86752	3.02952	5.98621	5.59143	4.08573	3.94934
ASHGA5P022409	0.0246061	1.86775	up	noncoding	ENST00000556266	DIO3OS	GENCODE	401	chr14	-	102023640	102025113		TGAATGGCAGTCATCCTCTTCAGCGGTCCTCCCAGAGCTGTCCTCAGCATGGCAGCCTCC	intergenic							99.1545	64.4196	6.53777	5.63647	129.093	160.42	153.371	113.72	58.1562	37.1554	47.1185	94.2021	66.3519	94.7209	51.4092	88.1436	62.2385	42.131	45.9424	8.10973	6.11348	5.83476	6.25498	5.6728	6.68058	7.54445	6.09136	6.14213
ASHGA5P057806	0.0246959	1.59661	up	noncoding	TCONS_00022104	XLOC_010715	LincRNAs identified by Cabili et al	1318	chr13	-	107124146	107125586		ATTTGTTGAACACACCTTAGGAGGACCTGGGAAATGTGAGCCACCTTTACCATCACACAT	intergenic							16.2547	6.8708	3.23997	2.56496	5	45.2397	35.5375	11.6434	14.0316	5	5	8.58519	5	6.69658	5	7.37284	11.0358	7.99043	5	2.62964	4.30826	3.76319	3.23119	3.79303	2.57053	2.61568	3.00823	2.35685
ASHGA5P037112	0.024864	2.02043	up	noncoding	ENST00000424252	RP4-724E16.2	GENCODE	1947	chr20	+	52169308	52191847		GTTCTCACCCACTGTTTCCATGATCACTCTCACAACAGAAAAATAAAATTGACAAGAAAA	intronic antisense	NM_006526	ZNF217	zinc finger protein 217	-	52183609	52199636	27.3105	18.7607	4.80727	3.79261	17.0188	53.8463	37.4025	30.1627	20.9056	13.5779	18.8714	26.6991	21.9032	15.6326	21.5327	39.5955	13.4076	9.07586	10.1774	5.69727	4.55298	3.81984	4.36792	4.28738	5.22394	6.16916	4.33965	4.44019
ASHGA5P017162	0.0248693	1.89199	up	noncoding	ENST00000438401	RP5-845O24.8	GENCODE	378	chr1	-	12882548	12883022	ENST00000432559, ENST00000437631	TGGGACCTTGAAGTCCCAGCATTTTTCATCTTTCAATCTCACCTCCTTTTCCTGATAATA	intergenic							1813.79	905.976	10.2869	9.36704	1203.35	5793.51	2122.23	2469.85	951.26	368.857	220.475	1380.75	831.701	1070.87	906.464	2172.99	496.048	490.578	373.182	10.6	11.3967	9.9185	10.9404	9.8162	9.92182	9.62695	10.075	9.5945
ASHGA5P017159	0.0249091	2.40021	up	noncoding	ENST00000438380	RP11-175D17.3	GENCODE	617	chr9	+	127532401	127535206		TTAACTCGAGCACTGATGAAGTCCACCAGAAGTGATGGGGATTCCAGCTCCATTCTGTCA	intronic antisense	NM_001489	NR6A1	nuclear receptor subfamily 6 group A member 1 isoform 2	-	127284702	127533576	31.3254	16.5017	4.94049	3.67733	14.0632	33.7928	82.0821	26.0809	17.2178	23.8671	24.449	29.05	34.5621	15.6556	17.414	18.1547	6.71386	8.16068	14.8506	5.44141	3.92311	4.89081	4.17149	4.03219	6.04177	6.56634	4.45682	5.13724
ASHGA5P032297	0.024967	1.7461	up	noncoding	TCONS_00016037	XLOC_007432	LincRNAs identified by Cabili et al	310	chr9	+	88068943	88069347		TAAAGCCAAACCATTCCAGCCACCCTGCAGATCTACCGAGGAGGAAAACTAATGTTTGTT	intergenic							110.959	73.4911	6.6707	5.86656	49.2493	269.491	143.525	89.597	124.208	55.8027	46.9489	108.849	68.9629	51.3371	79.5132	93.2233	80.9942	56.196	84.2107	6.96627	6.87922	5.72915	5.91221	6.77364	7.27239	7.53556	6.29719	6.19419
ASHGA5P029705	0.0249859	2.03476	up	noncoding	ENST00000555407	RP11-356K23.1	GENCODE	601	chr14	+	89816628	89820137		ACATCAAGCTGAGGTTTAATTCCATACTTGGTCAGTTCATTGTGGCCATCTCCCAAAAAA	intronic antisense	NM_001085471	FOXN3	forkhead box protein N3 isoform 1	-	89622515	90085494	191.355	109.258	7.25559	6.23073	96.4813	556.961	245.601	224.803	84.8573	79.8231	40.44	201.875	111.362	127.202	134.656	245.54	43.3205	51.5982	51.126	7.76563	7.94083	6.56026	7.26706	6.21927	7.78444	7.31772	7.18951	6.90953
ASHGA5P039296	0.0250231	2.04918	up	noncoding	TCONS_00024148	XLOC_011515	LincRNAs identified by Cabili et al	1210	chr15	-	68776650	68779860		GGAATGCAAACTAGGAATATAAATAAACTTTCTTTTTTCTCTGTTGCTCTCCTTCCTTCC	intergenic							41.2313	26.9461	5.35492	4.31988	26.146	87.4376	57.201	47.0811	26.8494	36.044	23.3109	25.7809	18.0992	33.949	27.0229	50.7621	20.0923	17.2681	21.429	6.22009	5.23827	4.35287	4.99569	4.61321	6.63315	6.49058	4.29551	4.15802
ASHGA5P023517	0.0251037	2.23866	up	noncoding	ENST00000582726	RP11-510D21.1	GENCODE	429	chr18	+	26365031	26369224		AGAGATTCAGATTTCTCCCTCAGTCTACTTTTGGACGTTCACAATGTCTGCATTTTGGAG	intergenic							556.058	273.838	8.65659	7.49395	285.875	1911.49	676.328	643.013	185.101	173.621	140.231	432.805	371.132	327.309	268.729	626.025	98.5006	139.587	85.5867	8.97793	9.71031	8.09076	8.88391	7.35281	8.90126	9.03622	8.2995	8.58416
ASHGA5P053436	0.0251258	1.52251	up	noncoding	ENST00000524284	RP11-32K4.2	GENCODE	616	chr8	+	65289889	65291035		TGGTCCTCTGCAGGTTTGAACAGGGCTAGCAGGTCTCTCTCCGGATTTCTAGGGCTATGG	intergenic							37.485	27.2392	4.98224	4.37578	14.6533	92.504	64.6307	48.2646	24.1909	13.3326	10.4706	31.8331	28.4302	34.7555	26.6568	44.7645	18.0403	18.7262	19.301	5.50052	5.31616	4.51992	5.02875	4.46968	5.19763	5.24717	4.57808	4.84538
ASHGA5P027324	0.0251848	1.76892	up	noncoding	ENST00000508763	RP11-834C11.5	GENCODE	719	chr12	-	54507796	54519675	ENST00000445151	ATTTGGACAAATGAATGAGGGACAACGTTCTCCTGAGGGTTTTCTTTAAGGGGCGAGGAT	intergenic							11.0159	7.91182	3.7063	2.88343	5.60154	18.4174	12.5285	14.404	8.69785	8.9497	8.75717	10.7707	10.7948	5	7.02161	9.11649	7.64713	10.4094	5.39329	4.17564	3.21251	2.6985	3.47218	3.2632	4.616	4.9462	3.26616	3.48099
ASHGA5P021206	0.0252253	1.83934	up	noncoding	ENST00000527543	RP5-903G2.2	GENCODE	455	chr11	-	67702033	67707245		GAGAGAATAGCTTGTCTTCTTCTCTCCCAGTAGATTCTTCATGAAGAGGCCATGTGCTAT	intergenic							100.719	60.289	6.3465	5.4673	40.4521	328.396	114.56	104.92	44.9734	36.5529	35.824	100.073	78.6663	87.1868	44.8829	103.111	38.5295	41.5035	28.1424	6.75886	7.16702	5.388	6.1471	5.32728	6.65564	7.14668	6.18138	6.40379
ASHGA5P038552	0.0253361	1.68603	up	noncoding	uc003fgn.1	AY940074	UCSC_knowngene	1559	chr3	-	169858399	169859958		TTTGGAATATCTCACTTTTATTTACTATGTTAAATGCTCCATTCCTTCTCCCCACCAGGC	intron sense-overlapping	NM_024947	PHC3	polyhomeotic-like protein 3	-	169805367	169899537	1133.31	710.248	9.81609	9.06246	649.131	3182.41	1395.8	1400.26	693.532	366.76	241.449	1137.12	655.502	928.318	760.039	1456.78	366.257	416.014	388.826	9.89795	10.5149	9.26129	10.0622	9.32507	9.91682	9.75257	9.79786	9.3082
ASHGA5P055663	0.0253417	2.17141	up	noncoding	NR_033951	P2RX7	RefSeq	3764	chr12	+	121570630	121624354	NR_033948, NR_033950, NR_033952, NR_033953	TGACTAACGCAGCGCTTGTCTGCATTCTCCCCAGGCCGCTGTGTTCATCGACTTCCTCAT	exon sense-overlapping	NM_002562	P2RX7	P2X purinoceptor 7	+	121570630	121624354	453.017	255.742	8.57747	7.45884	299.856	1264.2	568.03	499.849	201.806	198.876	177.885	413.634	396.528	278.84	285.638	496.951	95.0204	130.121	107.096	9.02792	9.13792	7.81913	8.44985	7.4799	9.09561	9.36015	8.24928	8.6767
ASHGA5P042349	0.0254079	1.68842	up	noncoding	ENST00000442150	MDC1-AS1	GENCODE	738	chr6	+	30670843	30680961		TTGTATCATTGTCCCTCTCCTTCACTAAAGGCTGATCCTTTTCAAGCTGGATTTCAGTTA	natural antisense	NM_014641	MDC1	mediator of DNA damage checkpoint protein 1	-	30667583	30685458	266.905	186.52	7.89553	7.13986	216.538	633.339	318.406	340.663	236.725	109.487	86.5946	193.484	170.541	202.452	192.363	372.831	137.012	119.029	111.412	8.68949	8.11916	6.95941	7.90325	7.72289	8.25096	8.39028	7.12879	7.5272
ASHGA5P031383	0.0254162	1.85019	up	noncoding	ENST00000568824	RP11-178L8.5	GENCODE	427	chr16	-	87324331	87325644	ENST00000569872	TGATATTTTTTGAGCACCAGCAGTAACGATAGTTACTATTCACTGTTTTCTCCCTGCCAG	intergenic							234.838	122.346	7.33645	6.44878	107.939	827.433	283.113	278.223	92.1158	50.5771	39.5141	199.785	103.202	172.664	115.964	263.027	64.4315	84.2165	52.9198	7.89561	8.49973	6.77478	7.59056	6.33276	7.1337	7.29101	7.17348	6.79852
ASHGA5P019331	0.0254522	1.5803	up	noncoding	NR_033686	PEF1	RefSeq	1696	chr1	-	32095462	32110838		AATCACCATGGCCAGCTATCCTTACCGGCAGGTGGCGCCCCTCCCAATGTGGATCCTGAG	exon sense-overlapping	NM_012392	PEF1	peflin	-	32095462	32110838	549.503	344.549	8.72084	8.06064	500.873	1645.45	637.301	574.558	323.499	146.672	110.24	457.434	301.248	460.229	284.719	652.262	275.187	244.192	194.007	9.60999	9.49163	7.99242	8.68243	8.20658	8.68116	8.71961	8.38287	8.31605
ASHGA5P039275	0.0255312	1.77775	up	noncoding	NR_038289	DLG1-AS1	RefSeq	1703	chr3	+	197025117	197030621		TACTAAATCAGCATAGGACTAATAACTGCCTCCCGTGTAAACTGGTCTATCCGGAGAGTG	natural antisense	NM_001098424	DLG1	disks large homolog 1 isoform 1	-	196769430	197025447	226.995	147.581	7.63733	6.80728	200.44	579.517	297.815	241.093	152.258	88.1839	78.0026	178.652	181.912	182.654	147.032	248.06	103.281	95.5564	74.5684	8.6165	7.99667	6.85112	7.37517	7.07589	7.92433	8.24778	7.01121	7.62242
ASHGA5P033166	0.0256718	1.63546	up	noncoding	ENST00000572193	RP5-867C24.5	GENCODE	673	chr17	+	45247191	45248415		CTTCATTACCAAAGTGCATCTAACTATGGAGACACAAATTTTTTCTCTCTCTCTCTTTCC	natural antisense	NM_001114091	CDC27	cell division cycle protein 27 homolog isoform 1	-	45195310	45266665	33.9764	24.2054	4.7457	4.036	7.90025	106.071	48.8454	39.7367	21.1655	14.1665	9.67198	24.2537	17.1324	20.2335	18.744	68.3121	18.3363	16.176	10.5036	4.65692	5.49889	4.13564	4.75303	4.30322	5.29199	5.11526	4.21067	4.0803
ASHGA5P026064	0.0256775	1.86893	up	noncoding	ENST00000530621	RP11-448P19.1	GENCODE	2826	chr11	-	133667934	133680395		TGCAAATGTTTAGGGGGAGATTTCCATATCACTCTAAAGTTGCTTGTCTTTCTCCCAAAG	intergenic							55.6919	27.1264	5.13789	4.23567	15.7896	218.592	58.4373	69.171	24.0447	12.1978	7.20111	40.1021	15.5224	33.3894	30.0257	62.5781	15.8558	21.4698	11.0437	5.59903	6.56088	4.38253	5.54371	4.46187	5.07213	4.59614	4.88681	3.94345
ASHGA5P027581	0.0257266	1.76465	up	noncoding	ENST00000548329	RP1-46F2.3	GENCODE	565	chr12	-	111389514	111395615	ENST00000546852	TTTACTGTGGGACTGGCATCATTTCAAGCATTTAATCCTCGTCCCAACTCTACGAGGAAG	intergenic							10.6814	6.33859	3.39943	2.58005	7.16268	22.4847	14.434	15.5662	5.72644	5	6.67425	8.40316	5	5	8.84352	10.5266	5	5	5	4.52091	3.4436	2.82198	3.56251	2.82529	2.57053	4.46713	2.98349	2.35685
ASHGA5P037946	0.0257406	2.03248	up	noncoding	ENST00000430449	CTA-342B11.1	GENCODE	473	chr22	+	32359343	32366387		ATGTGAGGATGTTTCTGCCACTCTGGACATTAGTTTTCTCCCCTAAGTGGCTCTATCTCT	intergenic							832.743	459.079	9.36258	8.33934	513.906	2524.65	1032.72	981.69	366.956	325.468	203.525	713.033	546.486	540.115	521.158	990.775	165.035	250.716	199.268	9.64078	10.1821	8.79436	9.52212	8.39543	9.75257	9.52093	9.0924	9.082
ASHGA5P057609	0.0259223	1.631	up	noncoding	TCONS_00019628	XLOC_009429	LincRNAs identified by Cabili et al	279	chr11	-	45011206	45029701		ATGATCTCATATATTTGTTTCTGCCTCCCACACAGATGAGAAAACCAAGGCTCCGGAGAG	intergenic							802.868	498.592	9.29688	8.59113	510.424	2424.37	1012.87	871.707	388.528	258.739	182.931	773.38	562.672	725.102	447.465	836.781	320.933	348.203	248.989	9.63117	10.1175	8.75513	9.35045	8.47184	9.43422	9.38806	9.22666	9.12061
ASHGA5P025714	0.0259484	1.67765	up	noncoding	NR_027751	FAM20A	RefSeq	3712	chr17	-	66531256	66554568		GAAAAGAGGACCCCAGGACTTCTTCTCCCCCTCAGGTGGGAGGTCAATCCCCTTTACTGT	exon sense-overlapping	NM_001243746	FAM20A	protein FAM20A isoform b	-	66531256	66597095	620.452	396.277	9.03056	8.28411	726.688	1456.54	736.801	716.461	309.497	225.93	180.977	610.722	398.94	551.112	365.051	650.758	268.948	317.057	222.076	10.0488	9.32249	8.23628	9.04426	8.13812	9.25107	9.37734	8.8261	8.68949
ASHGA5P032734	0.0261973	1.69344	up	noncoding	ENST00000570919	RP11-388C12.5	GENCODE	333	chr17	-	80687039	80692019		TTGCCAAGTTCACCAAGTGGCTTCTTCCCCCAAAGGTAATTCTACAGCTACTTTCATTCT	intergenic							138.01	93.1006	6.91871	6.15874	112.686	344.775	172.803	152.571	84.1171	53.1729	41.6336	142.318	72.2604	108.559	103.278	168.767	64.8018	66.5971	67.4415	7.94636	7.23331	6.02292	6.68986	6.20827	7.20182	7.36155	6.68554	6.26678
ASHGA5P019923	0.0263052	1.67032	up	noncoding	NR_038838	LOC100506122	RefSeq	1785	chr4	+	171961752	171980311		GGTATTCCTCCTGCTTTCTGCTAAAGGACCTAAAATTATATTGGAAATATCATCAAAGGA	intergenic							59.4002	44.4528	5.71821	4.97809	42.8799	85.1382	135.243	54.5234	63.2842	18.1271	16.8499	59.1558	26.1334	81.3789	43.4164	60.4159	47.9289	20.9156	30.9804	6.82058	5.20286	5.64374	5.19795	5.79085	5.64325	6.00558	5.4409	4.70837
ASHGA5P048079	0.0263547	1.68112	up	noncoding	AA420706		LincRNAs identified by Khalil et al	340	chr3	-	152716537	152716869		AGGAGATTATTGCTAAACCTCTGTTATTTGTGTTGCTATCACATTCTGCCCCCAGCTGGG	intergenic							69.2828	46.1521	5.91606	5.16664	55.0947	154.106	106.665	92.2728	38.6493	24.7019	18.9768	63.7963	49.2342	42.9306	41.6438	78.2788	32.4109	35.2774	43.2886	7.10606	6.05263	5.27999	5.95334	5.1259	6.08812	6.17901	5.54344	5.6794
ASHGA5P026003	0.0264463	2.2499	up	noncoding	NR_051992	SENP1	RefSeq	5147	chr12	-	48436680	48499775		AAGACTTGAAATGGACTGTCTCCCCAGATGATATTGCTGATAGGATGAGGATGGATGCTG	exon sense-overlapping	NM_001267594	SENP1	sentrin-specific protease 1	-	48436680	48500091	329.279	180.846	8.13864	6.96878	185.254	952.17	440.845	349.219	140.596	180.53	159.203	226.414	305.522	187.584	192.807	334.822	76.3512	94.6123	74.2239	8.53478	8.70348	7.44726	7.94205	6.96069	8.952	9.21647	7.35241	8.33378
ASHGA5P047038	0.0264695	1.55961	up	noncoding	uc001kps.2	DQ372722	UCSC_knowngene	739	chr10	-	101286106	101290907		GAGAGGACTTCACAGCTATCTTTGTGGATCTGCCCCTCCAAAAATTTTAAAGATAAAAAG	intergenic							724.556	492.708	9.19891	8.55772	758.2	1480.77	908.832	766.995	556.11	151.791	140.99	1032.76	283.779	911.264	404.799	828.645	426.573	297.84	296.06	10.1098	9.34305	8.57595	9.15817	8.98022	8.72755	9.04831	9.64821	8.23264
ASHGA5P057059	0.0264715	1.62112	up	noncoding	TCONS_00012365	XLOC_005930	LincRNAs identified by Cabili et al	303	chr6	-	169252753	169256278		AATGTTTTCTTTACCACCCGTTTTCAGCAATTTGATTGTGGTAGGCCTTCAGTGGGGCTC	intergenic							9.16504	6.72038	3.41604	2.71905	6.84014	14.5546	15.4256	11.3569	7.09969	5.33593	5.75908	6.9483	5	5.08783	5.4611	12.0299	6.82737	5	7.63651	4.45467	2.92277	2.88585	3.20414	3.04706	3.84638	4.19022	2.77725	2.35685
ASHGA5P018022	0.0264788	1.80697	up	noncoding	ENST00000448433	TDRG1	GENCODE	1015	chr6	+	40346075	40347624		CCTCGCCTAGAAGAATTCCATTCTCCCATCCCAGGAAGGAGAGTGCCCTGCGTGCCACGA	intergenic							1479.64	788.583	10.0275	9.17395	820.921	4672.88	1930.49	1747.86	586.208	313.133	261.102	1504.52	875.118	1198.42	632.621	1600.6	433.978	455.482	323.871	10.1955	11.0614	9.74353	10.3831	9.05505	9.69654	9.85831	10.2267	9.66319
ASHGA5P028296	0.026532	1.77676	up	noncoding	ENST00000549266	RP11-100F15.2	GENCODE	219	chr12	+	114518185	114551294	ENST00000546791	CCATGTGGTCCAGCCATAATTATTTGTTGTCACAACTAAGTTTCCTTTCTATATGAAAAG	intergenic							18.5413	11.6862	4.17199	3.34274	9.62847	41.5636	28.7316	18.9899	11.781	10.7862	6.69481	20.1549	18.6818	8.91697	12.3422	12.6816	8.63892	5	15.5416	4.92431	4.19323	3.53885	3.77985	3.60211	4.88722	4.47282	3.97751	4.2064
ASHGA5P030306	0.0265639	2.30278	up	noncoding	ENST00000561215	CTD-2544M6.2	GENCODE	452	chr15	-	98628855	98632038		TGTCTTCTCCCCACAAATGAAAGAGAAATAGTAAATTCTCCTGCGGGTGGCGAATCAGGA	intergenic							336.625	185.687	8.21095	7.00757	167.226	887.283	406.172	385.483	141.034	276.106	150.662	279.035	333.41	204.34	189.961	318.345	76.8057	102.781	74.1625	8.40693	8.58881	7.32402	8.08219	6.96269	9.52212	9.13932	7.66154	8.44787
ASHGA5P047015	0.0265785	1.59963	up	noncoding	ENST00000449419	RP11-429G19.2	GENCODE	948	chr10	-	97634840	97667532	ENST00000414006	CCTGGGGCGTGGGTCTCTCATCCCTCTCGTCCTGGTGAAGAAGAAGAGTATACCCAGCGG	natural antisense	NM_001098175	ENTPD1	ectonucleoside triphosphate diphosphohydrolase 1 isoform 2	+	97471535	97637023	100.359	75.6677	6.53406	5.85632	78.693	212.976	157.803	107.002	85.6301	42.3725	35.8443	82.5516	57.6185	95.1736	75.7048	133.686	63.3562	51.2863	52.8482	7.53556	6.5215	5.88097	6.17381	6.23014	6.87173	7.14869	5.91008	5.93348
ASHGA5P041073	0.0265871	1.88708	up	noncoding	ENST00000512498	RP11-159F24.6	GENCODE	572	chr5	+	43511159	43521913		CTCCTGCAACTGTCTGGAATTTCTTCTCTCTCCAATCCATCTCTAGTATTGATGACATAG	intronic antisense	NM_198566	C5orf34	uncharacterized protein C5orf34	-	43486802	43515273	50.1344	33.9885	5.54385	4.6277	20.5207	127.394	69.3023	54.6136	34.2285	31.531	24.618	38.8674	54.4945	30.7404	26.6427	59.4071	28.3344	21.3754	16.9248	5.92919	5.77263	4.62596	5.20027	4.95496	6.44375	6.57906	4.84502	5.84774
ASHGA5P032123	0.0266297	1.91555	up	noncoding	ENST00000421055	RP11-335O13.7	GENCODE	380	chr1	-	203096386	203097082		GCATCTTCTCATCCCATATTGTTTTGCAGGCTCTACCCTGAGTCATTATATTCCTTTCTC	natural antisense	NM_000674	ADORA1	adenosine receptor A1	+	203096835	203136533	56.7222	38.3365	5.72743	4.78967	19.7705	139.046	66.435	64.0455	43.9947	31.3419	29.0159	60.1288	56.7099	47.4474	38.059	59.1696	30.2689	20.2116	16.4889	5.88435	5.90138	4.56801	5.43437	5.3022	6.43376	6.83553	5.45981	5.90773
ASHGA5P055808	0.0266445	1.63409	up	noncoding	NR_046636	PCDH9-AS3	RefSeq	522	chr13	+	67551520	67559908		TAAAGAAAGTTTTGATGCTGGTATCCATATCCCTCCTTCTCATCAACAACAAAAAGGATG	intronic antisense	NM_020403	PCDH9	protocadherin-9 isoform 2 precursor	-	66876965	67804468	229.521	159.194	7.61921	6.91072	212.056	535.937	270.539	263.036	181.666	68.9342	57.1296	246.872	128.656	300.245	127.308	222.717	118.965	87.7344	128.735	8.67004	7.87659	6.70176	7.50846	7.32993	7.57376	7.8159	7.47723	7.10688
ASHGA5P043210	0.0268345	2.18159	up	noncoding	ENST00000426262	RP11-669M2.1	GENCODE	746	chr1	+	188477668	188505596		AATTTTTTCACTGGCCCTCTAACATTATAAGACAGAGCAAGTGGAGTAACTCATCCACTG	intergenic							18.1129	10.3008	4.24314	3.11776	30.5291	22.3181	18.0461	17.4587	21.0212	6.75487	8.47648	20.299	5	14.7521	10.9315	16.4532	8.25322	5	11.7158	6.41256	3.43421	3.05005	3.69006	4.29504	4.18741	4.88831	3.98752	2.35685
ASHGA5P041349	0.0268889	1.78582	up	noncoding	ENST00000514619	RP11-425E13.1	GENCODE	643	chr5	+	124537580	124538223		ACCGTACTGTAATTATCTGTGATCTTTCTTCCTCCCCCTATGTTATTCTGTAAGACCTAA	intergenic							6600.93	3471.72	12.3082	11.4716	7736.92	18504	7301.32	7633.16	4080.21	1943.72	1452.92	4155.21	3267.41	4158.36	3840.96	7196.1	2085.25	1826.74	1927.25	12.7398	13.3841	11.9286	12.8877	12.1082	11.8399	11.7308	11.8466	11.277
ASHGA5P016159	0.0269976	2.04172	up	noncoding	ENST00000427392	AC073342.12	GENCODE	592	chr7	-	142952356	142983756		AGAAGCGGCTTCTCCAGTCTCCCCAGTTCTTCAATCTCAAATAAATCATCTGTAGAGTCC	intronic antisense	NM_001143679	GSTK1	glutathione S-transferase kappa 1 isoform b	+	142960521	142966222	645.413	389.961	9.11876	8.08898	386.59	1733.1	808.539	749.086	370.058	361.128	231.156	523.644	537.045	403.044	482.652	798.271	164.94	196.508	147.264	9.2999	9.56632	8.38855	9.11787	8.40073	9.8873	9.70062	8.58881	9.05923
ASHGA5P048113	0.0270382	2.11606	up	noncoding	TCONS_00014010	XLOC_006657	LincRNAs identified by Cabili et al	328	chr7	-	153120802	153125424		GAAACGAAGGCACTCACAATCTCCCTTTCTTAACAGACTGTGTCTCATAAGAGGGAAAAC	intergenic							772.118	420.848	9.26657	8.18519	360.916	2447.87	703.032	969.903	358.377	322.194	253.793	760.866	496.06	575.453	434.408	909.249	162.889	217.668	150.21	9.21992	10.1331	8.15629	9.50783	8.35993	9.7396	9.81938	9.19648	8.94561
ASHGA5P023619	0.027067	1.76503	up	noncoding	HMlincRNA1099-	HMlincRNA1099	LincRNAs identified by Khalil et al	3715	chr9	-	111202292	111206007		TCTTTCCCTCCTTTTTCTCGGAGGGAATATGCTTTTATTGGCACACTTGTCTACGTGCAG	intergenic							30.7491	18.8599	4.72998	3.91029	26.8791	76.813	43.6374	33.4164	13.3474	11.5864	7.53761	32.7758	15.6363	24.5391	17.1551	27.1433	12.2144	16.0997	19.2311	6.25264	5.05297	3.99483	4.51183	3.7373	5.00121	4.67632	4.61276	3.95453
ASHGA5P026096	0.0272057	1.7591	up	noncoding	ENST00000526431	RP13-46H24.1	GENCODE	547	chr11	+	528906	529659		ACTTCCCAGTCTTGTCCTCTGGGATTGGCAGTTTGCAGGGGTATCCTCGGCATCAGACCA	intergenic							27.4789	17.9237	4.56612	3.75128	5.60518	52.9941	43.6863	42.1323	29.1741	10.8875	9.35352	25.9978	33.3265	8.72798	16.7149	31.8205	8.53843	12.7479	13.5898	4.17663	4.53161	3.99741	4.83899	4.72843	4.89919	5.05253	4.30414	5.07971
ASHGA5P037130	0.0273016	1.70832	up	noncoding	uc002xyu.1	AK056098	UCSC_knowngene	2570	chr20	+	56285238	56287808		AGTTAATTCAGTGGCTTAAAGAAACCAAACCTACCCACAACGCTTGACCTCCCATTGATC	natural antisense	NM_199169	PMEPA1	transmembrane prostate androgen-induced protein isoform b	-	56223447	56285670	63.3035	43.2317	5.73161	4.95903	47.6992	133.991	133.051	54.5498	52.4844	15.8998	17.0249	51.7283	34.2062	65.6794	49.706	73.6445	32.3901	22.0466	24.9494	6.92664	5.84469	5.61911	5.19854	5.53712	5.45249	6.02179	5.25248	5.11827
ASHGA5P038062	0.0273503	1.62879	up	noncoding	ENST00000380981	WI2-81516E3.1	GENCODE	3426	chr22	+	49288728	49294198	NR_038944	GCAGCTTGTAACCCCATCCCTGTAATGAGAATGAAAATTAATTCAATTTGTATCATTTCC	intergenic							85.5954	64.1414	6.32977	5.62597	77.299	154.009	129.765	83.3507	83.2531	32.2946	30.9082	93.8839	46.2425	75.5636	74.604	94.1033	69.5426	41.4464	47.4871	7.51528	6.05098	5.58036	5.80953	6.18887	6.47813	6.92773	6.0873	5.58175
ASHGA5P042232	0.0273903	2.01583	up	noncoding	uc003mwn.1	AK094934	UCSC_knowngene	3162	chr6	+	5004049	5240729		CTCCTCTGCTGACACTTTGGAATATGGCATGTACCCAAGTTAATTTATTTTCAATGTATA	intron sense-overlapping	NM_001145115	PPP1R3G	putative protein phosphatase 1 regulatory inhibitor subunit 3G	+	5085719	5087455	31.4246	21.0316	5.02579	4.01442	13.0794	50.7711	45.9133	35.8279	32.8941	26.5086	23.1458	23.2565	29.556	17.9791	17.6968	33.6436	18.7407	12.1769	17.4284	5.34236	4.47064	4.05887	4.61161	4.89712	6.18956	6.47927	4.15692	4.90266
ASHGA5P045796	0.0274792	1.6404	up	noncoding	ENST00000443163	RP11-395D3.1	GENCODE	530	chr9	+	89247061	89311411		CACCCTCGCCAAAACCCCTGAAATACAGAAATGTGGTATTAAAACAGTTATGACTGGAAA	intergenic							35.5715	26.9138	5.07887	4.36482	22.8171	78.9465	51.3286	44.3825	25.6245	20.5053	12.8544	28.1129	21.9558	20.2296	22.8172	50.5173	24.9413	30.0437	17.8918	6.06178	5.08912	4.20372	4.91125	4.55006	5.81901	5.58487	4.41111	4.4437
ASHGA5P036509	0.0277778	1.75813	up	noncoding	ENST00000568958	RP11-223I10.1	GENCODE	598	chr2	+	231916754	231917352		GTGTCACCCGGCTGCGTTTCGCATCTCTGCTCCCATGAATAAATGTATTTACTCTAAAAA	intergenic							354.658	200.291	7.9987	7.18466	138.189	1122.32	481.771	457.762	148.438	94.1924	65.2859	329.308	232.473	246.859	184.703	408.739	116.106	132.949	80.2097	8.18932	8.93301	7.56906	8.32737	7.03609	8.02219	8.00838	7.90421	7.95732
ASHGA5P028133	0.0278473	1.77566	up	noncoding	TCONS_00010079	XLOC_004536	LincRNAs identified by Cabili et al	2284	chr5	+	124298626	124317909		ATAGGTGCCAGAAATTGTCTATTTCTCCCCTTCAAAACTTGTCCAAACCTTTGCCCCTGT	intergenic							828.874	512.145	9.42921	8.60086	668.9	2281.22	950.001	959.374	451.758	339.19	226.209	754.335	537.585	553.833	573.821	1016.21	254.061	404.154	245.355	9.9366	10.0096	8.65247	9.49321	8.67311	9.81406	9.67215	9.18249	9.0608
ASHGA5P044668	0.0279444	1.90879	up	noncoding	ENST00000521055	RP11-13N12.2	GENCODE	458	chr8	+	16461763	16522388		CCAGAAATATTCTCATTCCTTGCCCTTCAACATTCTTCAATTTGATTAAAAGACCTCCAA	intergenic							44.2595	31.365	5.51206	4.5794	25.5191	75.1429	46.4559	48.9547	51.579	26.6209	28.4265	51.3769	27.9639	31.0691	35.2976	49.0027	33.1236	18.694	24.4045	6.19419	5.02153	4.07328	5.04658	5.51287	6.19573	6.80779	5.24452	4.81759
ASHGA5P020023	0.0279735	1.61348	up	noncoding	ENST00000506875	CTC-459M5.2	GENCODE	494	chr5	+	111527882	111542760		AAGAAAAGAGGAAAGAACTATTCTAAAATGGACCCTCCCTCCAAAAAAGCCCAAACAGCC	natural antisense	NM_022140	EPB41L4A	band 4.1-like protein 4A	-	111498314	111755010	4253.57	2515.23	11.7078	11.0176	4073.61	11557.5	5068.42	5150.1	2781.72	1367.34	918.389	3111.44	2479.1	2931.68	2687.5	4915.81	1605.93	1520.92	1465.69	11.9527	12.5789	11.3794	12.1944	11.5005	11.4186	11.2408	11.3967	10.9404
ASHGA5P048685	0.0281557	1.89816	up	noncoding	ENST00000560623	RP11-605F22.2	GENCODE	481	chr15	-	48481583	48483888		TCCGTAGTGCTGAAATGGTGCGTGGTGAGACCTGTCTCCCCAACACAAGCTAGAAGACAA	natural antisense	NM_001145668	CTXN2	cortexin-2	+	48483866	48495951	105.953	67.8292	6.58441	5.65981	63.5082	256.91	134.335	115.825	52.8485	45.5769	49.5904	129.028	82.5395	92.5703	76.073	106.972	40.5057	39.2454	36.8982	7.26428	6.80703	5.63454	6.28278	5.54869	6.97471	7.62048	6.54281	6.48005
ASHGA5P027210	0.028183	1.6067	up	noncoding	TCONS_00011697	XLOC_005176	LincRNAs identified by Cabili et al	303	chr6	+	13328899	13330028		ACTTAAGCTGCCTGCGTGCAGGACCCGGGTTTTGCTTTTGCTAATTTCCTCCCCACCCCA	intergenic							321.797	204.842	7.96964	7.28554	328.298	871.352	399.344	338.405	247.847	81.1087	54.9231	253.102	131.011	230.218	206.236	412.69	169.874	135.573	148.288	9.12944	8.56167	7.29548	7.89161	7.79193	7.80904	7.76154	7.51642	7.134
ASHGA5P029319	0.0282217	1.62824	up	noncoding	AI124845		LincRNAs identified by Khalil et al	402	chr10	-	32036583	32036986		TAGTATGGGCTCCCTGCCATTTCATTTAGAACTTTGTAATTGAGGCATAATAAACATGTA	intergenic							92.4965	67.9941	6.3725	5.66919	49.7245	212.337	139.386	102.307	60.8858	32.4469	37.6127	105.272	73.7442	113.384	58.1136	100.481	50.6993	38.9278	40.6086	6.97724	6.51738	5.68435	6.10819	5.73632	6.48627	7.21642	6.25384	6.30264
ASHGA5P016589	0.0285049	2.29874	up	noncoding	ENST00000431997	RP1-288M22.2	GENCODE	454	chr6	+	72160536	72168577		CTTAAAATAAGGTGCTAGGAATCACTCCACTCTGAAGGATTCCCTTGTCTTCATGGCCCA	intergenic							22.4163	12.997	4.58869	3.38784	7.35881	30.969	28.8642	16.4992	19.8691	32.4163	22.7026	20.6508	12.6153	9.40965	8.53375	22.736	17.1505	7.97128	12.5625	4.55696	3.81695	3.54375	3.6276	4.22243	6.48292	6.44973	4.00915	3.6728
ASHGA5P047579	0.0285223	2.20926	up	noncoding	ENST00000437032	RP11-149I23.3	GENCODE	603	chr10	+	91043562	91044311		GGGCTTGATCAGACCTCAAAAAGATCTCCCTTTGCATTTTGCTCTTAGTTCTCAGTGATC	intronic antisense	ENST00000282673	LIPA	lipase A, lysosomal acid, cholesterol esterase [Source:HGNC Symbol;Acc:6617]	-	90984865	91102461	551.092	325	8.91456	7.77099	332.968	1423.8	772.225	569.307	288.081	303.787	252.334	466.23	520.225	427.337	400.598	553.978	110.351	148.521	113.988	9.14827	9.29392	8.31454	8.66725	8.02126	9.65331	9.80544	8.41247	9.01599
ASHGA5P028702	0.0285986	1.88547	up	noncoding	TCONS_00016126	XLOC_007511	LincRNAs identified by Cabili et al	224	chr9	+	110570349	110574037		TGTTTGGGAAGAAGATGCTCTTGAATGCTTTGCTCAACAAACACCTCCCTTCTGCAAGGA	intergenic							173.716	99.1346	7.096	6.18108	144.012	549.197	203.933	186.536	111.889	48.3223	45.8266	100.012	91.3699	102.992	110.461	214.726	56.6074	69.1212	48.665	8.2372	7.91221	6.28109	6.98353	6.61917	7.06377	7.49174	6.17932	6.63058
ASHGA5P041971	0.0286254	1.86475	up	noncoding	ENST00000418134	RP1-60O19.1	GENCODE	650	chr6	-	107172489	107187962		TTTAAAACTCACGACTCCTTGAATCAATAGTCAATTTCTGGATCTTTCTCCTCCTCCTAG	intergenic							163.683	91.0418	6.99002	6.09103	186.791	461.695	184.964	192.871	72.1265	55.1142	28.6669	127.236	64.4679	126.529	87.2918	175.276	60.4904	62.3272	60.9107	8.54144	7.65038	6.12482	7.03252	5.97891	7.25396	6.81662	6.5215	6.10236
ASHGA5P039560	0.0290694	2.33933	up	noncoding	ENST00000503597	RP11-55L3.1	GENCODE	138	chr4	-	117411231	117412356		AATGTCATTCCTGTTCTCCCCAGAATTGGTGAAATCAGCAACAGAACTATTCATTTCATT	intergenic							201.095	113.475	7.50222	6.27612	100.553	554.957	234.756	212.704	102.317	149.784	108.527	145.161	166.625	117.295	120.552	239.211	40.0695	67.8117	42.7627	7.81293	7.93185	6.4949	7.18179	6.47927	8.71137	8.69422	6.71138	7.49061
ASHGA5P039040	0.0290927	1.83184	up	noncoding	ENST00000381790	RP11-319G6.1	GENCODE	494	chr3	+	139258757	139302096		AACTACGGGCGAGAAAATTGGGGCACTTTCCACGTCTCTCCCGAAAATAAAAGAAAGGAT	intronic antisense	NM_001200047	NMNAT3	nicotinamide mononucleotide adenylyltransferase 3 isoform 2	-	139279022	139396885	63.9735	41.8037	5.82349	4.95019	27.5054	177.014	76.6033	72.3568	34.9919	40.4606	21.8471	61.0095	50.9853	46.5387	40.3996	78.1045	23.2736	33.8116	19.5123	6.28589	6.25454	4.77902	5.60936	4.98235	6.80625	6.38893	5.48155	5.73665
ASHGA5P037591	0.0291466	1.63454	up	noncoding	ENST00000486209	PI4KAP2	GENCODE	3213	chr22	-	21827288	21838423		ATCTTTTCCTTCTCTTACATGGTTCAGGTGCCACGGGGTAAATTAGGGCTTCTGCAAAAC	intergenic							19.3934	14.5365	4.22626	3.51738	5.08075	41.4483	26.3477	17.9946	18.4352	16.5326	7.66016	21.6478	10.8331	15.3234	13.1819	27.4781	14.7131	8.93985	11.2861	4.03634	4.18958	3.45154	3.72313	4.12646	5.51034	4.70414	4.06859	3.48521
ASHGA5P016950	0.029217	1.5349	up	noncoding	ENST00000435968	AC005062.2	GENCODE	551	chr7	-	19958822	20179997	ENST00000437191	CCAGTACAAAATCGCTTCTTGACCTGCACAACTTTCTGATTTGATGAGTTCAACAGAAAC	exon sense-overlapping	NM_182762	MACC1	metastasis-associated in colon cancer protein 1	-	20174278	20257013	13.4516	8.88841	3.56916	2.95101	5.69909	22.1802	20.9285	21.8945	9.79044	6.23412	5	15.8857	5	9.89981	10.104	15.0907	5.56878	9.79556	6.76006	4.19878	3.42719	3.20489	3.94477	3.39213	4.07219	2.61568	3.69762	2.35685
ASHGA5P037309	0.0292469	1.90502	up	noncoding	ENST00000411989	LINC00114	GENCODE	1790	chr21	-	40110944	40114441		TCATTCCTATATACCCATTACATTGATGGATAAGTATTAGGTTCTCTCTCCTCTTGCCAG	intergenic							370.906	183.002	7.92717	6.99736	188.968	1332.49	425.882	451.312	154.351	77.6224	42.2352	294.383	169.43	258.805	159.231	418.21	96.9454	110.04	68.3562	8.55311	9.20374	7.39684	8.30807	7.09218	7.74246	7.38136	7.73962	7.51642
ASHGA5P031299	0.0292954	1.8997	up	noncoding	ENST00000456293	GAS5	GENCODE	583	chr1	-	173834386	173837129	ENST00000421068, ENST00000443799	CCTCCTAGTGCTGAATGCATTAAATAAATGGCGGATTCTTGTCTTGTTATGATTAATAAG	bidirectional	NM_001122770	ZBTB37	zinc finger and BTB domain-containing protein 37 isoform a	+	173837492	173855774	15.5508	10.5906	4.05447	3.1287	12.6462	26.4077	26.9213	9.09995	16.6454	13.9246	6.49166	12.2694	16.1443	10.6988	5	11.6785	7.37524	13.5556	9.68171	5.29492	3.62859	3.47112	2.95884	3.99079	5.26448	4.41637	3.41063	3.99266
ASHGA5P020480	0.0293007	1.77882	up	noncoding	ENST00000514368	RP11-434D9.1	GENCODE	756	chr5	+	66915618	67093432		GGAGCTTTCCCTTGTGAAGTGAAAGCAAAGTTTTAAAATTTTTTCTCCTCTGCAAGAAAA	intergenic							26.9225	19.033	4.69111	3.86019	9.60671	67.8905	31.8476	34.6279	20.739	17.6945	14.2126	18.7615	19.1125	14.916	16.6473	35.6262	19.9874	11.3459	15.5957	4.92138	4.87724	3.65055	4.56526	4.27541	5.60555	5.74166	3.89179	4.24123
ASHGA5P021922	0.0293703	2.05843	up	noncoding	NR_034015	LOC100131060	RefSeq	994	chr1	+	59250822	59365384		ACAAGGTTTTCCGGTTCTAGCCAGAGGAAGCTGCAGCCAGGCCTGGCAGTCTCCCCTGCT	intergenic							236.992	123.944	7.43368	6.39213	172.385	749.644	321.716	257.912	112.349	51.4018	40.5963	189.931	126.95	144.803	158.382	276.616	46.927	68.8221	45.1055	8.44926	8.37148	6.97081	7.48031	6.6233	7.15276	7.32289	7.09861	7.08735
ASHGA5P040637	0.0293757	1.58511	up	noncoding	ENST00000505546	CTC-210G5.1	GENCODE	558	chr5	-	121780353	121812785		TTCTCATGGAACCAACAGGCCACTTACTCCTTTAGCTGCTTGGTTAACTTCACCACTTGA	natural antisense	NM_001242935	SNCAIP	synphilin-1 isoform 1A	+	121647819	121799794	14.1348	10.5302	3.78826	3.12368	5.8332	24.2101	23.4604	23.0581	16.6517	6.17049	6.06313	7.63167	9.7427	5	8.76056	23.4385	13.7173	5.33532	7.71671	4.23067	3.52825	3.32827	4.00972	3.99128	4.0591	4.28516	2.87363	3.36407
ASHGA5P040944	0.0293943	1.9448	up	noncoding	TCONS_00021981	XLOC_010584	LincRNAs identified by Cabili et al	1809	chr13	-	43423873	43437077		GTTGACCCCTATCTCCCCATGTAACCAGGGCTTAAGCTTTTCTTTGCATCATTCAAACTG	intergenic							4611.98	3056.35	11.9518	10.9922	5689.04	7366.94	5514.98	3894.11	2452.58	3737.78	4155.5	4084.94	8326.21	3393.34	2977.75	3081.19	1091.41	1291.84	1232.74	12.3529	11.7684	11.4927	11.6898	11.2505	12.5517	12.6869	11.8213	12.2855
ASHGA5P035680	0.0294953	2.09993	up	noncoding	ENST00000445418	AC092159.2	GENCODE	1943	chr2	+	677185	682802		TGCCTACAGAAATTCCAAGATGTTTGTCATAGCATTTTTATTCTAACCCTCCTTAATGAG	natural antisense	NM_152834	TMEM18	transmembrane protein 18	-	667972	677439	76.221	44.8167	6.10418	5.03384	110.729	120.538	139.833	63.0841	74.36	24.5835	32.0407	44.6006	27.9052	62.5982	53.1607	62.9366	38.6642	20.1656	48.2867	7.92498	5.68899	5.69069	5.41299	6.02179	6.07989	6.97899	5.03509	4.81316
ASHGA5P033880	0.0295899	2.1723	up	noncoding	ENST00000579862	RP11-775G23.1	GENCODE	852	chr18	+	63273325	63319289		TCAGAAGTCTCCCCACTGTGGATGGGAGACAGAAAAGAAAGAAAGAGCCTGAATTACTGA	intergenic							186.106	108.141	7.4908	6.37158	233.554	333.742	276.336	144.452	137.352	131.078	97.8761	134.46	175.016	92.8721	117.382	151.524	63.5487	69.1693	87.4759	8.77045	7.18913	6.73335	6.62005	6.92805	8.52452	8.56026	6.6006	7.55687
ASHGA5P038741	0.0296504	1.95597	up	noncoding	TCONS_00023261	XLOC_011240	LincRNAs identified by Cabili et al	2484	chr15	+	48619764	48622979		AACATCTCTCCCAGACCTGGAAACACAGCCAGTAGCAAGGTCAGTATTAAGTTACCACAA	intergenic							484.581	312.516	8.79783	7.82994	419.143	1076.74	604.168	566.626	292.253	275.548	253.781	388.385	480.262	334.891	330.571	553.922	173.208	185.389	129.371	9.39081	8.87883	7.91418	8.66016	8.04462	9.52093	9.81728	8.15579	8.90259
ASHGA5P045940	0.0297674	1.66903	up	noncoding	AU185412		LincRNAs identified by Khalil et al	629	chr17	+	33306242	33306872		AATTCTAAATGATCTTCAAAAACGCACTTTACTCTCCACCCTAACTAGCTGAATCATCTC	intronic antisense	ENST00000585073	CCT6B	chaperonin containing TCP1, subunit 6B (zeta 2) [Source:HGNC Symbol;Acc:1621]	-	33269577	33308097	43.2044	31.696	5.30562	4.56661	17.4905	92.6036	58.3303	70.0721	40.7653	20.8082	16.1281	29.4369	21.5069	23.243	39.1982	63.5339	23.7389	28.9081	21.7431	5.73018	5.31893	4.37988	5.56028	5.20055	5.84378	5.93619	4.47518	4.41111
ASHGA5P034476	0.0297696	1.71595	up	noncoding	BF352825		LincRNAs identified by Khalil et al	324	chr12	-	68315048	68315360		GGACATGCATCAATCAATGTTTGTTTGTTTCTTCCATCTCTTGCTCTTCCTAGCCCCACT	intergenic							70.0011	49.8907	6.02734	5.24833	53.7921	134.021	85.1512	85.9237	82.705	20.7855	28.878	68.7519	33.1606	43.5478	53.9605	95.8523	34.0475	44.4285	44.2378	7.07426	5.84554	4.94234	5.85229	6.17873	5.84071	6.82789	5.65696	5.07141
ASHGA5P038381	0.0298173	1.66054	up	noncoding	TCONS_00015375	XLOC_006941	LincRNAs identified by Cabili et al	580	chr8	+	141474980	141478663	TCONS_00014872	TCTTTTCTGTGGTGTTCCTTCAGTCTAGAATATTCTCCACCTAGTACAATCCTGCTCCTC	intergenic							21.2024	15.2132	4.32719	3.59553	6.52841	46.9384	21.0919	28.7058	16.2969	13.9873	7.6049	28.4653	22.5156	12.7126	13.3715	25.9473	11.2083	10.4827	10.2547	4.38629	4.35841	3.21381	4.30322	3.96487	5.27245	4.69145	4.42701	4.48451
ASHGA5P045880	0.0298315	1.92139	up	noncoding	TCONS_00001692	XLOC_001050	LincRNAs identified by Cabili et al	451	chr1	-	157019845	157021546		CCGTCAGCTATTCAATCAAGCATTGAGTTTCTAGAATCTCTCCCAGAAATAAAAGCTGAC	intergenic							279.206	177.753	7.99181	7.04966	159.796	679.608	314.034	297.7	151.235	154.251	126.083	350.941	281.021	295.697	138.633	208.748	94.4055	114.474	111.293	8.35661	8.22532	6.94017	7.69242	7.06489	8.74684	8.91822	7.99004	8.22347
ASHGA5P038463	0.0298591	2.0756	up	noncoding	ENST00000492725	ATP1B3-AS1	GENCODE	376	chr3	-	141637093	141637863		CTGGGTTTTTCATTAACATTTCCCCCAACTATTCTAGAAGCAAAGGATACGTAATAGATA	intronic antisense	NM_001679	ATP1B3	sodium/potassium-transporting ATPase subunit beta-3	+	141595469	141645382	63.3562	39.5635	5.9217	4.86817	49.8649	134.748	89.7141	68.6402	28.1203	45.4907	29.4563	60.8152	46.9336	48.8877	48.6582	63.171	22.8916	22.7198	23.6827	6.98025	5.85359	5.0228	5.53297	4.67686	6.97127	6.8592	5.47669	5.60842
ASHGA5P037671	0.0299183	1.82534	up	noncoding	ENST00000445391	LARGE-IT1	GENCODE	558	chr22	-	34119817	34120898		TGTATTTGCTGGCTGTTGAGACTGTCTCTTTTCTATGTTCTCCCGCTGGACTGTAAACTC	intron sense-overlapping	NM_004737	LARGE	glycosyltransferase-like protein LARGE1	-	33669061	34316416	64.2506	42.4664	5.80674	4.93858	25.3438	177.677	83.586	75.9533	35.4989	23.1417	30.0313	62.7727	60.3559	51.9254	36.6957	76.3435	26.2534	24.0575	21.6333	6.18519	6.25858	4.91608	5.6794	5.00359	5.99927	6.88994	5.52189	6.00136
ASHGA5P042991	0.029934	1.78408	up	noncoding	ENST00000440074	RP11-89N17.3	GENCODE	380	chr7	-	33908112	33913843		GGTCATCTCCACTCCTAGAAGAGTTTCAAACATCTGTACTTTCAGACTGGAGGAAATAAG	intergenic							520.48	304.483	8.66908	7.8339	314.255	1222.43	855.892	542.647	160.355	205.778	106.707	755.776	273.36	648.846	223.475	395.78	167.814	248.816	173.293	9.08131	9.06484	8.4763	8.5819	7.15039	9.13686	8.6746	9.18645	8.18818
ASHGA5P043008	0.0299609	2.05624	up	noncoding	ENST00000449672	AOAH-IT1	GENCODE	573	chr7	-	36637439	36639726		GGATGATTCCAAGACTAACTAGTTTCTGAGATATCAGCAAGGATTCCAGGAATCTCCCAG	intron sense-overlapping	NM_001177506	AOAH	acyloxyacyl hydrolase isoform 2 preproprotein	-	36552548	36764154	12.0839	6.83121	3.63088	2.59088	5.60865	33.7532	13.9924	5	5.2583	16.8087	6.29317	9.95669	5	5	6.32072	15.0381	5	6.45965	5	4.17723	3.92147	2.79348	2.33704	2.75033	5.53608	4.35415	3.17727	2.35685
ASHGA5P033553	0.0301835	1.96602	up	noncoding	ENST00000582697	RP11-958F21.1	GENCODE	386	chr18	-	22534170	22567629		TGTTTGGATTTGGGAATGTAAGGACCATCTCCTCCAAGCTAAACTCTGAAGTATAAGGTG	intergenic							67.4631	42.3954	5.98176	5.00648	43.5808	172.251	84.1905	69.1185	48.2754	48.1048	27.4013	46.7828	53.1655	39.2317	45.8514	74.6262	21.8906	31.6903	30.3119	6.83712	6.22131	4.92612	5.54207	5.42045	7.0586	6.74067	5.10774	5.80884
ASHGA5P046958	0.0301986	2.47011	up	noncoding	ENST00000428862	RP11-202P11.1	GENCODE	2851	chr10	-	80703084	80722151		AAGTGTTCATGGCTTAAACCCAACACTTGATTTCTCCCTGAGCCAGTCTCTGTGAATGTC	intergenic							145.26	73.4392	6.89061	5.58604	51.3933	447.234	162.602	175.423	40.1178	97.7419	62.1026	125.465	125.965	98.1345	61.9281	140.58	26.5972	27.8872	32.9814	7.01716	7.60636	5.92772	6.88702	5.17847	8.07486	7.93488	6.49842	7.07641
ASHGA5P023415	0.0302982	1.63983	up	noncoding	ENST00000580500	LINC00511	GENCODE	561	chr17	-	70400662	70441259		TAAAGGTGCCTTAGCAAGATGAGTTATCTGGTATTTTTCCCTCTCCACCCTGGTCTTCTC	intergenic							543.595	344.637	8.76753	8.05398	630.136	1399.02	646.648	582.154	386.473	169.437	106.297	428.598	280.131	439.667	358.165	669.425	238.636	209.277	217.158	9.86665	9.27401	8.014	8.70476	8.4583	8.86747	8.66779	8.28725	8.21858
ASHGA5P039919	0.0304004	2.36107	up	noncoding	ENST00000562284	RP11-731J8.2	GENCODE	7000	chr4	+	47433976	47440976		AAGACCTCCAACTTCCAAATTAATTCTCTCCCTTGAGAAAGAATGTGTTGACAATAAAAC	intergenic							103.15	62.3133	6.63973	5.40029	66.4142	242.903	116.494	104.828	57.2492	72.6529	74.3964	90.2594	100.251	71.6143	61.7123	121.676	28.4153	29.8769	22.6479	7.32402	6.71815	5.41169	6.14538	5.65239	7.64616	8.18776	6.03228	6.75953
ASHGA5P022093	0.0304108	1.5486	up	noncoding	ENST00000548964	AL512355.4	GENCODE	413	chr14	+	105639540	105640155		AGAACATGGTCTGTCTGGAGCCAGTCAGGCATCCCTTCCCTGATCACGTTGTACTCGCCA	natural antisense	NM_177533	NUDT14	uridine diphosphate glucose pyrophosphatase	-	105639273	105647660	203.161	137.201	7.34709	6.71613	163.051	544.642	275.432	222.534	137.756	51.3936	41.0197	189.457	104.048	179.139	133.238	247.748	111.489	84.1069	100.641	8.37912	7.89813	6.72738	7.24862	6.93277	7.15232	7.34205	7.09633	6.81051
ASHGA5P030410	0.0304191	1.71975	up	noncoding	TCONS_00008444	XLOC_003895	LincRNAs identified by Cabili et al	822	chr4	-	16115964	16122540		TCACCAAATAAGTTTTGGAAATACATTTCTAAGGGACTCCTTCCCAAAGGAGCTTCCCAG	intergenic							232.549	131.276	7.40143	6.61923	122.826	690.155	301.396	321.215	92.1283	52.5388	39.1552	240.976	144.899	222.532	104.036	202.767	75.2748	86.7495	82.6745	8.04294	8.25205	6.87255	7.80904	6.3331	7.18321	7.27821	7.44036	7.27586
ASHGA5P043652	0.0304401	1.61715	up	noncoding	ENST00000436266	AC092657.2	GENCODE	239	chr7	+	46341717	46383219		ATGGTGTCACTACTTGCAAGCTGTGAGTCTGTTTTGAGAACTCTCTCCATCTCTCCAAAT	intergenic							19.58	14.4906	4.11364	3.42018	8.69986	38.0741	51.7507	13.5819	11.0922	7.95883	7.13229	18.3502	9.09358	25.5187	11.404	30.2966	13.596	5	6.52492	4.79491	4.07373	4.21441	3.41175	3.52964	4.44145	4.5795	3.8637	3.28229
ASHGA5P021198	0.0304714	1.90169	up	noncoding	ENST00000527453	RP11-770G2.4	GENCODE	472	chr11	-	65556521	65557492		TGCCCCGGGAGATTCTCTCCTTGCCATGGGGATGAGGACAAATTCTCCCTTCATCCTTGA	intronic antisense	NM_004561	OVOL1	putative transcription factor Ovo-like 1	+	65554504	65564690	381.404	217.494	8.19881	7.27154	218.583	1211.02	433.25	472.579	178.195	111.903	98.4695	327.236	260.226	269.618	220.155	457.819	96.6855	121.714	96.239	8.70123	9.04291	7.42157	8.37194	7.30662	8.28561	8.56638	7.89425	8.12763
ASHGA5P036864	0.0304909	1.81652	up	noncoding	ENST00000441270	RP1-309F20.3	GENCODE	927	chr20	-	57438582	57463881		TTTTCCTTCCCATTATCAACTCATTAAAGGAAGTTAAAAGTACTTACTCTGTCCCACACA	intronic antisense	NM_001077490	GNAS	protein ALEX alex	+	57428035	57486250	55.6997	36.4609	5.48624	4.62506	25.8406	178.228	64.9062	60.9547	43.2353	19.1906	13.2062	40.0359	33.9101	35.544	33.1909	95.4634	19.36	17.3802	20.3779	6.20827	6.2638	4.52929	5.35989	5.28054	5.7298	5.63373	4.88456	5.10355
ASHGA5P023716	0.0305624	1.82036	up	noncoding	HMlincRNA1593+	HMlincRNA1593	LincRNAs identified by Khalil et al	4217	chrX	+	39487152	39491369		ATTTCCATGTGGGTGTGAATCTTTTTATCATGTGCAGATGCTTCACCTCCCTTCTAATTT	intergenic							72.9385	46.0168	6.01207	5.14785	48.9704	192.37	95.1124	92.4321	32.1204	33.8808	29.3802	59.2419	58.1209	50.9629	35.926	75.585	31.0108	34.6816	35.8301	6.95787	6.37678	5.10511	5.95507	4.86161	6.54307	6.85566	5.44141	5.94406
ASHGA5P039372	0.0305696	2.38366	up	noncoding	ENST00000382007	AC024132.1	GENCODE	2509	chr4	-	27209126	27220026		GATCTTTCTCCTACAGCTCATTTAACCATGCAATTAGGCAGTTAAGTAGATGCAAAATAT	intergenic							15.0978	8.42774	3.98499	2.73181	10.5776	46.3651	11.2072	13.1324	6.91934	13.8993	11.5202	7.16151	21.2991	5	5	11.4003	5	6.29483	5	5.05806	4.34231	2.6196	3.3719	3.02001	5.26118	5.39927	2.80756	4.39771
ASHGA5P020628	0.0306786	1.65458	up	noncoding	ENST00000517726	EVX1-AS	GENCODE	480	chr7	-	27281047	27286848		GTAGTAAATCATCTCTCACTCTCTCCTCCAAATGACTGATGGCCTTAAGTTTTCCACAGC	intronic antisense	NM_001989	EVX1	homeobox even-skipped homolog protein 1	+	27282163	27286192	219.117	152.677	7.5939	6.86744	112.064	579.035	307.134	243.262	164.942	125.159	71.0916	150.249	175.953	162.638	134.716	280.557	124.349	91.0431	99.4822	7.94057	7.99541	6.90387	7.39086	7.18873	8.45352	8.12415	6.75412	7.56542
ASHGA5P029799	0.0307017	1.77964	up	noncoding	ENST00000559946	CTD-2555C10.3	GENCODE	1603	chr14	+	103011590	103022163		ATCTGTCCAGGAGCTCCTTCAATGTCAAGACATCCAGAAAGATCTGTCTTCCTCCTTTTC	intergenic							89.2114	48.4767	5.8953	5.06371	34.1643	330.968	101.75	105.984	38.5476	20.7962	11.6779	69.8037	40.3389	60.4995	37.8573	118.129	31.3635	31.919	19.2293	6.55232	7.1801	5.20907	6.16002	5.12154	5.84175	5.42091	5.67669	5.37904
ASHGA5P035384	0.0307511	1.71743	up	noncoding	ENST00000425470	AC009313.1	GENCODE	503	chr2	-	161952741	162016735		GAAGTAAAATAGACCTGTATTCCTGTCATTCTCTTTCTCATTTTCTTCCTCCTCACCAAA	intronic antisense	NM_004180	TANK	TRAF family member-associated NF-kappa-B activator isoform a	+	161993465	162092682	482.316	258.383	8.362	7.58175	254.179	1672.16	558.684	581.955	219.311	104.003	67.7931	400.442	259.902	354.943	218.899	522.327	166.207	176.209	110.191	8.86136	9.50965	7.79335	8.70294	7.60286	8.16571	8.06078	8.19936	8.12584
ASHGA5P033558	0.0307658	1.83856	up	noncoding	ENST00000584560	RP11-552O4.1	GENCODE	640	chr18	-	24402776	24403943		CCTCTGCTAAGAGTTACTGCTTTTGTGCCTCCCCAAAAAGATATAATAAAAATAAGATTG	intergenic							198.41	135.029	7.57124	6.69266	238.412	308.846	252.237	250.182	205.11	102.699	76.48	153.312	161.302	234.593	115.522	165.162	83.3794	99.1395	86.1034	8.79052	7.07932	6.59724	7.43134	7.50601	8.14855	8.22917	6.78777	7.44394
ASHGA5P040705	0.0308667	1.9233	up	noncoding	ENST00000523722	GS1-39E22.1	GENCODE	771	chr5	-	135236041	135253850		TTATTTCCTGCTTAGAACTAACTGCTGTTTTGCAGTTAGTTCTGTCTCTCTCCTTAGAAG	intergenic							95.058	48.367	5.94736	5.00377	31.843	361.172	102.013	110.841	40.3146	16.341	14.5693	83.3703	55.2425	73.1957	32.0676	110.382	23.1676	25.3561	19.1582	6.46903	7.29725	5.21491	6.2186	5.18402	5.49409	5.77807	5.92288	5.86536
ASHGA5P026770	0.0309687	2.66974	up	noncoding	uc001pkw.1	AK094117	UCSC_knowngene	1693	chr11	+	110225919	110278336	ENST00000526605, ENST00000526703	AATCTCTCCTTTGGAAAGAGCTGGAACTTTTAGTAAAACTGAACAGTGAGGTGGCGGAAG	intergenic							42.7889	21.6512	5.30497	3.88827	24.8018	76.6974	98.4152	29.6331	17.2493	50.5095	24.092	20.9125	59.9621	14.5261	18.4678	28.4578	8.61616	13.3694	8.15915	6.15635	5.05042	5.15738	4.34747	4.03394	7.12941	6.54144	4.02337	5.99117
ASHGA5P029145	0.031041	1.7324	up	noncoding	ENST00000560336	LINC00520	GENCODE	792	chr14	-	56248784	56263406	NR_026796, NR_026797	AAGAAGACAACCTTCTAAGATACTTTTCCTGCCCTCCAAGGGCTGTGGAGAATCTGATAG	intergenic							29.3286	20.2537	4.73867	3.9459	29.5938	62.518	46.6322	28.6841	20.4883	7.994	10.6711	28.0472	14.6723	24.1321	20.2995	35.3492	18.798	13.4935	15.0311	6.37115	4.76448	4.07815	4.30161	4.25901	4.4475	5.27904	4.40843	3.86273
ASHGA5P058548	0.0310813	1.8693	up	noncoding	uc010fkx.1	WASH2P	UCSC_knowngene	1047	chr2	+	114346126	114354406	NM_182905, uc001aac.4, uc002tkd.3, uc009vjb.1, uc010scz.2, uc010sdb.1, uc010utt.1	TACCTGCAGAAGGTCTCTGGAGACATCTTCAGCAGGATCTCCCAGCAGGTAGAGCAGAGC	intergenic							181.313	107.424	7.24924	6.34674	86.6005	489.674	308.764	174.308	64.8388	95.564	68.7092	162.048	146.34	99.6836	109.344	187.879	71.5408	76.3812	60.799	7.64075	7.74201	6.91512	6.88024	5.8252	8.04462	8.08005	6.86592	7.29234
ASHGA5P000574	0.0311945	1.92597	up	noncoding	CR745936		LincRNAs identified by Khalil et al	532	chr20	-	17806254	17807629		CAGGCAGTCCTACTCCCCCAAGACAGCATCTTTTGCCAGTTGCTGTTTATGGATTTTCTC	intergenic							231.919	147.29	7.74527	6.79968	231.85	530.857	279.816	246.849	133.53	131.923	97.5861	202.942	183.336	160.822	159.667	261.622	85.5979	101.377	78.6058	8.76264	7.86083	6.75584	7.41005	6.88702	8.53419	8.55549	7.19609	7.6347
ASHGA5P017547	0.0312991	1.98382	up	noncoding	ENST00000442967	AC017096.1	GENCODE	560	chr2	+	200322422	200324615		TTATTAGTTGCGTTGAGTCATCAGGCAAAGACCCCGAGGGCTCTCCCACATCTCCCGCAG	intronic antisense	NM_001172517	SATB2	DNA-binding protein SATB2	-	200134222	200329831	147.257	89.5725	7.00662	6.01833	130.355	400.788	187.081	151.024	105.21	63.9677	50.9603	88.6663	100.247	79.1101	115.343	184.24	49.1167	48.3961	50.5548	8.11862	7.45242	6.1427	6.67614	6.52119	7.4653	7.66236	6.01418	6.75922
ASHGA5P019245	0.0313898	2.34328	up	noncoding	ENST00000475151	BTN2A3P	GENCODE	579	chr6	+	26423779	26428899		CCAGAAGAAAGAAAGTGTCATTTTTATTCCAGAGCAACTTCTGAAGAATTGCATACGTTT	intergenic							14.5665	7.4439	4.00017	2.77164	21.5129	23.747	22.1888	6.19075	14.5695	13.6305	8.3582	6.33427	14.9108	5	5	9.27428	6.02883	5	6.89339	5.98733	3.50405	3.26393	2.62154	3.83856	5.23046	4.86327	2.69225	3.88352
ASHGA5P021490	0.0315166	1.89492	up	noncoding	ENST00000533304	RP3-468B3.3	GENCODE	592	chr6	-	33860086	33864691		GCAGAAGAAGACCCCAAGGCATCTCCCCAAGATGACCACAGTTGTCCCTGAAGAAGCAGT	intergenic							844.346	521.192	9.49308	8.57095	543.72	2294.77	1032.28	917.274	422.132	435.25	295.817	813.523	736.249	569.89	571.968	987.88	209.716	330.04	242.6	9.70162	10.025	8.79198	9.42654	8.59435	10.102	10.0133	9.28987	9.44785
ASHGA5P046994	0.0316852	1.80264	up	noncoding	ENST00000449882	RP11-80H5.4	GENCODE	1613	chr10	-	91426943	91461177		CATATTAACATGCCTTTAAATCTGTCTCCCTACCATTCCATCATTTATTTTGGGGGTCAG	bidirectional	NM_016195	KIF20B	kinesin-like protein KIF20B	+	91461366	91534700	1212.83	635.514	9.7279	8.87779	726.723	4263.75	1293.92	1477.89	506.09	265.403	240.981	927.895	672.28	787.381	604.578	1354.08	363.896	402.264	264.117	10.0503	10.9328	9.14747	10.1402	8.84699	9.47495	9.74902	9.48157	9.34305
ASHGA5P000191	0.0317279	1.94847	up	noncoding	chr10:125967200-125988150-	chr10:125967200-125988150	LincRNAs identified by Khalil et al	20950	chr10	-	125977210	125998160		GACTTTCTCCAAAGGCACTAACCTTTTAAAAGTTCCTTTCTGTTCTTTGCATTCTGTTTG	intergenic							25.9442	18.378	4.7911	3.82876	15.821	38.3007	34.9355	30.1779	27.5469	27.846	13.954	18.9715	15.1247	19.8834	23.0509	32.3054	13.2109	15.8716	9.19947	5.60362	4.08325	3.74394	4.36919	4.6491	6.25858	5.71464	3.9065	3.90509
ASHGA5P051306	0.0318879	1.5906	up	noncoding	NR_027833	APOL3	RefSeq	2471	chr22	-	36536370	36556977		CTGTCCACAGGTGGCTCACATTCAGTCCCACAATTTGCTTTCTCCTCCTCAAGGGTTAAG	exon sense-overlapping	NM_145640	APOL3	apolipoprotein L3 isoform 1	-	36536370	36556977	97.3955	73.9266	6.45274	5.78317	61.756	226.042	121.077	118.698	86.787	42.5539	27.6408	94.6085	43.8696	89.6856	76.3392	144.914	52.5727	48.3687	61.7369	7.23087	6.6153	5.47811	6.31597	6.25064	6.87883	6.757	6.09517	5.51061
ASHGA5P057953	0.0319383	1.64535	up	noncoding	TCONS_00024377	XLOC_011701	LincRNAs identified by Cabili et al	745	chr16	+	34685256	34686664		TGGAGACCAAATAAGGCTTGAAAGCATACTTTTGATCATCGTCCCTGTCGTCACAATGGG	intergenic							11.327	7.40914	3.41236	2.69396	5.0883	26.7958	17.0079	9.45678	8.75887	8.78865	5	9.71982	5	5	8.93433	15.4777	6.81933	5.63266	5	4.03835	3.64518	2.98757	3.0051	3.26891	4.58768	2.61568	3.15038	2.35685
ASHGA5P042271	0.0319928	1.79306	up	noncoding	ENST00000449143	RP11-239H6.2	GENCODE	191	chr6	+	20212317	20294706		TGCTTAATCTGCCAGCCAGGGATCCAGAAGCACCATCTCCCTGTCTGCATTCTGATCACC	natural antisense	NM_001080480	MBOAT1	lysophospholipid acyltransferase 1	-	20100934	20212670	221.6	145.563	7.57399	6.73157	126.835	606.918	325.885	242.778	126.079	107.434	75.0656	161.802	181.12	148.343	147.456	297.95	91.3787	85.1607	67.5288	8.08498	8.0554	6.98624	7.38602	6.7977	8.21623	8.20142	6.86392	7.61193
ASHGA5P045752	0.0320247	2.00365	up	noncoding	ENST00000419576	RP11-561O23.7	GENCODE	416	chr9	+	70922308	70923361		TCACGCCTGACTAGAGCACTCTGCTTCACAGAGGGGCGTTCTGCGCGTTCTTCCTCCCTG	intergenic							637.478	310.877	8.7318	7.72918	385.907	2068.29	517.846	898.992	244.422	165.078	57.6644	761.623	193.521	642.09	219.803	647.376	166.968	183.417	122.963	9.29613	9.84225	7.68916	9.3946	7.77366	8.83025	7.82722	9.20115	7.70575
ASHGA5P031248	0.032121	1.86903	up	noncoding	NR_037845	LOC100506023	RefSeq	5619	chr1	-	173204198	173446294		AAGCTCCTTGGGTTTTCCTACTTTACTGTGCATTACAACTCATGTGTCAAGTTCAAAGAC	bidirectional	NM_004905	PRDX6	peroxiredoxin-6	+	173446485	173457946	17.7913	13.4749	4.20509	3.3028	14.7353	28.0959	23.0235	20.4912	17.0943	13.8311	5.22697	19.8317	17.862	20.4922	7.95491	23.2058	12.8848	6.92446	5	5.50516	3.69987	3.30713	3.87065	4.02337	5.2515	4.02682	3.95622	4.13679
ASHGA5P055489	0.0321324	1.84337	up	noncoding	TCONS_00029007	XLOC_013931	LincRNAs identified by Cabili et al	1493	chr21	+	37477279	37481023		TGTGTGTGTGCATGAATGATCACAAATAACCCTACCTGCGGTGTTGTTCATGTGGATGGT	intergenic							18.771	12.259	4.19319	3.31084	6.06597	34.2035	42.6983	15.641	16.2635	10.2979	14.7593	10.2382	20.5377	12.9121	6.62063	20.6064	11.6232	6.33079	7.18211	4.2836	3.94042	3.9671	3.56705	3.96208	4.81629	5.80249	3.20649	4.34779
ASHGA5P042780	0.0321497	1.79893	up	noncoding	TCONS_00020022	XLOC_009324	LincRNAs identified by Cabili et al	674	chr11	+	126925626	126926425		ACTTCTTCCCCCTGGGAAACAAGATATCAAGGAAAATGATGCACCTTGTTTGCCTCCCTT	intergenic							60.5753	39.9628	5.76125	4.91411	47.6942	144.534	76.1217	79.0265	37.1996	34.7537	15.0819	50.1905	39.2345	37.3262	50.2029	72.3965	26.5254	30.446	23.6084	6.92601	5.9606	4.76875	5.73906	5.0682	6.57756	5.83731	5.2125	5.33528
ASHGA5P020737	0.0321682	1.51769	up	noncoding	ENST00000519144	RP11-16M8.2	GENCODE	564	chr8	-	57408804	57472145		ACTTATCTCACCCTCACCAAGGTGGCTTCTTCTTGGATATCTGAATGGTGGTGAGATCAA	intergenic							118.83	83.7497	6.57119	5.96931	79.2841	291.13	167.469	147.727	78.2837	34.7309	18.5372	133.479	55.4711	104.402	90.3616	153.947	81.1365	53.6537	47.2763	7.54226	6.99498	5.97678	6.64729	6.1017	6.57574	6.1419	6.58886	5.87257
ASHGA5P014844	0.032341	1.83256	up	noncoding	NR_033979	HOXD-AS1	RefSeq	3819	chr2	-	177037923	177053686		CGTACTCCAGATCTGGGGACCCTTCACCTGCCTCTACTACTGCAAATGATTGGATATTCG	natural antisense	NM_024501	HOXD1	homeobox protein Hox-D1	+	177053306	177055635	81.9531	53.1104	6.10975	5.23589	55.482	205.2	123.063	93.2797	46.5613	20.3375	26.8407	84.8614	27.5713	66.1788	68.3925	85.105	47.8	21.2504	55.4745	7.1126	6.46317	5.50002	5.96723	5.37193	5.80625	6.70682	5.95001	4.79327
ASHGA5P027619	0.0323634	1.80969	up	noncoding	BG925695		LincRNAs identified by Khalil et al	461	chrX	-	43134151	43134491		TCATGGTTCTTCAGTGTCAAATGACTTTCCCCTCATTTCTGGAATCCATACGTAGGCATA	intergenic							24.207	17.9544	4.6601	3.80436	15.3105	44.9158	32.9046	29.3482	17.9021	14.7032	14.549	24.0227	15.7013	19.8276	21.1786	29.7836	14.1071	10.9223	14.1605	5.56066	4.29927	3.68399	4.33547	4.08715	5.34077	5.77564	4.19784	3.95956
ASHGA5P034089	0.032366	1.54933	up	noncoding	ENST00000427154	RP1-184J9.2	GENCODE	666	chr1	-	23346639	23414551		GAAAAGGTGTGCAAGAAAGACCTAAGGAATAAAATACCCCTCCCAGCAATCATCGATGCC	exon sense-overlapping	NM_001142546	LUZP1	leucine zipper protein 1	-	23410515	23495351	3200.07	1985.71	11.2697	10.638	2971.53	8713.62	3979.35	3933.15	1923.2	1009.81	610.349	2459.53	2226.19	2040.96	2007.28	3881.61	1469.6	1341.61	932.72	11.5897	12.1117	10.955	11.7066	10.8925	11.0792	10.8051	11.0176	10.7981
ASHGA5P022069	0.0324619	1.53411	up	noncoding	ENST00000548416	CTD-2314B22.1	GENCODE	533	chr14	+	19642022	19643233	ENST00000550892	TTGTTCCAGAAGGCTTGAGGGTCCCCGAGTGCACCGCCCTCCCACCAATTTCTGGTTTTT	intergenic							2241.63	1464.46	10.8344	10.217	3272.99	5380.52	2282.3	2067.13	1556.38	852.627	766.003	1755.06	1616.43	1946.23	1416.99	2457.72	1135.51	897.75	780.56	11.6948	11.2956	10.0488	10.6534	10.5969	10.8803	11.0261	10.4792	10.4082
ASHGA5P028355	0.0324984	1.54381	up	noncoding	NR_038290	LOC100507091	RefSeq	2191	chr12	+	123565930	123569291		AATTAAAGCAGATTTTCTCTTCCACTCCCCTTCCCCAAAACAAGAATAAATCAGTTCTAC	intronic antisense	NM_020845	PITPNM2	membrane-associated phosphatidylinositol transfer protein 2	-	123468026	123594975	4493.38	2979.37	11.9075	11.281	6873.86	8253.13	5006.03	3781.63	3458.63	3347.51	2645.37	2580.89	4527.17	3052.71	3127.28	4425.05	2127.68	1797.95	1797.74	12.5744	11.9794	11.3459	11.6511	11.8716	12.4364	12.3092	11.0917	11.6579
ASHGA5P056125	0.0325507	1.55017	up	noncoding	TCONS_00026992	XLOC_013040	LincRNAs identified by Cabili et al	923	chr19	+	32594122	32595603		GTTAGTTCAAAAGATAACAGCTGCAATACCTCACCTCTCCATTCAGCACTACAGAGCCAG	intergenic							91.144	65.5063	6.30318	5.67075	61.9737	226.543	131.216	108.689	77.2927	28.1906	28.3597	66.8865	49.0369	51.2409	64.2695	117.759	63.1292	55.592	57.5169	7.23416	6.62086	5.59794	6.19387	6.08326	6.27792	6.80341	5.614	5.67215
ASHGA5P041643	0.0325868	1.7043	up	noncoding	ENST00000443445	RP1-223B1.1	GENCODE	789	chr6	-	3594480	3624981		TGAAACAGCGGGAGAAACAGAACTCTCACCTTCCTTAACCTGGATCCCAGAATTTAAACG	intergenic							63.6275	44.764	5.89701	5.12783	63.9507	129.334	81.9777	61.899	59.3822	22.7236	24.7302	65.023	30.4298	52.5177	47.7207	62.5659	37.9323	37.0178	45.1636	7.27048	5.7961	4.88899	5.38221	5.70367	5.97438	6.58523	5.57503	4.94353
ASHGA5P014751	0.0326882	1.83944	up	noncoding	ENST00000413035	IPO9-AS1	GENCODE	839	chr1	-	201657386	201798687		ATCCTCGGGAGATTCTTCAAAACATCCCATTTTCCCCAGGAAGTTCTCCTTGATTCCATG	natural antisense	NM_001167738	NAV1	neuron navigator 1 isoform 2	+	201708962	201796102	24.0209	16.7775	4.59392	3.71466	9.8662	52.4872	33.4783	21.6241	23.8036	12.1753	18.8063	19.9266	22.1828	13.0353	16.5141	29.659	13.6981	10.6816	11.6716	4.95973	4.51941	3.69877	3.93048	4.4475	5.06894	6.16421	3.96234	4.45919
ASHGA5P015622	0.033032	1.57323	up	noncoding	ENST00000422023	RP11-242F11.2	GENCODE	446	chr6	-	148338557	148342110		AGTTTTCAAGTTTAATTCAAGTGCATCTACCTCTTCTCCACTGTTGACACCAGAAAACTC	intergenic							37.3013	28.4015	5.06847	4.41475	23.1386	83.7686	57.9858	46.0839	35.1606	13.8813	11.0652	27.3261	20.9319	20.8178	30.4291	54.2557	28.8528	20.4304	23.0927	6.07747	5.17634	4.3708	4.96617	4.98865	5.25943	5.34011	4.36881	4.37214
ASHGA5P043340	0.0330346	1.84596	up	noncoding	ENST00000444003	AC058791.1	GENCODE	363	chr7	-	130566535	130567582		ACCATTCAGTGCAAGCCAAATTGTGCTAATTTCCAATTTTTCTCCCTTTCTCTTGGTGAG	intergenic							322.912	166.401	7.74941	6.86504	125.411	1198.2	395.111	377.209	134.477	92.7381	42.6122	217.537	170.003	167.991	157.24	403.955	96.1368	107.804	61.6737	8.06958	9.02467	7.27671	8.04526	6.89718	7.99609	7.39303	7.29277	7.52065
ASHGA5P032914	0.0331548	1.85928	up	noncoding	ENST00000584923	SNORD3A	GENCODE	699	chr17	+	19091328	19092027		AGGCGGGGGATGCTGTGTGGCACCTCCTATTGTCTCTTTTTGCGTTTTCTCCCATTCTCG	intergenic							159.431	99.6139	7.08039	6.18564	60.1039	490.167	189.7	167.703	79.2374	86.8148	73.3574	128.364	135.692	95.4109	70.5576	209.627	69.9752	61.088	54.9475	7.19769	7.74466	6.1627	6.81901	6.11987	7.89813	8.16571	6.53533	7.19028
ASHGA5P041342	0.0332499	2.04554	up	noncoding	ENST00000502467	RP11-436H11.3	GENCODE	446	chr5	+	124065402	124065848		AGATAAAACAGTACCTATTTTTTCACCACCATTTAACTTCCTCCTACTACTGGTGTGTGC	intronic antisense	NM_020747	ZNF608	zinc finger protein 608	-	123972609	124080805	38.1242	22.9341	5.11079	4.07831	35.4019	81.2432	73.6993	32.3095	21.2364	13.4444	15.3262	32.3331	30.5547	36.1574	22.125	30.5961	9.43117	9.82274	21.8515	6.59949	5.13158	4.7185	4.46207	4.30858	5.21059	5.85863	4.59685	4.94972
ASHGA5P014949	0.0333065	2.00361	up	noncoding	ENST00000415101	RP11-402G3.5	GENCODE	404	chr9	-	117418583	117424654		GCGGACACTGTGCTGTACCAAAAAGACATCCACGCCTCCCCTATGACAACCGCATGATGC	intergenic							2883.4	1219.32	10.9004	9.89779	3747.68	5405.77	7466.96	1083.76	2998.68	399.697	553.003	1411.63	832.247	1952.13	1274.24	2194.33	777.956	541.652	962.698	11.8345	11.304	11.9636	9.66671	11.6174	10.0053	10.7096	10.102	9.59509
ASHGA5P051370	0.0333189	1.60957	up	noncoding	uc011asd.2	RPL23AP82	UCSC_knowngene	974	chr22	+	51195513	51227614	NR_026981	TATAGGCGTGAGCCACCGCTTACGGGCGAAGACTTGCTTGTCCGTGTCCTTGCCATCTAA	intronic antisense	NM_001003789	RABL2B	rab-like protein 2B isoform 1	-	51205919	51222087	24.7991	19.5861	4.51084	3.82417	10.6701	45.4324	29.2292	35.6541	25.5025	7.27206	8.93022	35.7019	9.13455	28.5032	21.4825	40.0159	11.951	12.5614	13.4541	5.06948	4.31411	3.55724	4.6061	4.54192	4.29551	4.97566	4.72671	3.28699
ASHGA5P018327	0.0333207	1.53945	up	noncoding	ENST00000452110	PI4KAP1	GENCODE	2340	chr22	-	20383523	20398220	ENST00000450651, ENST00000494740	ACTACTTCAGTCCCTGACTCCAGACACTCAGCCGTTGTCCTCTTATGGTTGTTTGAAGCT	intergenic							38.0672	29.1109	4.98173	4.35932	11.2396	94.8692	61.125	42.3024	43.043	11.6463	10.889	29.4231	17.5416	24.6643	35.4174	65.3719	26.6758	17.6901	16.4151	5.1413	5.35266	4.4424	4.84478	5.27329	5.00879	5.31566	4.47498	4.11259
ASHGA5P031086	0.0335549	1.84661	up	noncoding	ENST00000563751	RP11-297C4.1	GENCODE	577	chr16	-	30510086	30510875		CTTCCCTAAAGCAGACCTCAACATGTCACTGTCTCCTCTTAAGGAAAATAATAATGATAC	natural antisense	NM_001114380	ITGAL	integrin alpha-L isoform b precursor	+	30483982	30534506	18.9213	13.7945	4.36109	3.47621	11.3634	34.5991	18.9653	24.1631	13.4906	20.1708	10.085	18.533	18.251	16.6324	8.39826	22.0284	10.6888	11.7873	8.77503	5.15907	3.95252	3.10495	4.07531	3.74772	5.79264	5.17919	3.87731	4.1709
ASHGA5P030604	0.0335672	1.61979	up	noncoding	uc002aqh.1	BX538221	UCSC_knowngene	4347	chr15	+	67152640	67156987		AGGCAGACATGAGTCAACATATAACCAGCTCTTTCTCTTTGACTTCCATATTGCCCCAGG	intergenic							15.1305	11.7042	4.02286	3.32706	13.1775	24.5562	21.2898	15.9573	13.1969	5.77509	8.57656	18.5147	11.9053	9.09957	9.80113	18.1803	9.81625	14.8323	8.29431	5.35441	3.54506	3.2226	3.5888	3.7242	3.96052	4.91191	3.87537	3.59984
ASHGA5P058459	0.0337602	1.89812	up	noncoding	uc003tek.4	AAA1	UCSC_knowngene	1534	chr7	-	34758473	34873943	ENST00000442669	CTTTCTTAAGTGAGGAGGCTAAGACCTGGAGTGACTTCTCCCCAGATTTTTGTATACCTG	intronic antisense	NM_207172	NPSR1	neuropeptide S receptor isoform A	+	34697896	34889590	219.825	136.002	7.53125	6.60668	135.817	580.565	270.573	287.576	113.306	84.0874	60.6915	225.987	194.241	197.951	126.962	229.145	51.9206	72.1235	79.6702	8.16736	7.99777	6.70284	7.63897	6.63618	7.85763	7.90126	7.34803	7.71162
ASHGA5P044546	0.0338724	1.71904	up	noncoding	TCONS_00014758	XLOC_006843	LincRNAs identified by Cabili et al	391	chr8	+	74005609	74006141		GCTCTGTTTTCTGATAAACCAATTTCTCCCCCTAAAAACTCTGTGTACTGATATTTTAGA	intergenic							4776.2	2735.73	11.9124	11.1308	4737.76	12734.3	3760.58	6650.95	3264.09	1984.1	1280.96	3796.84	2571.01	2732.56	3347.03	5497.41	1601.47	1994.43	1406.21	12.1303	12.7335	10.8577	12.6499	11.7588	11.8623	11.6038	11.703	10.9786
ASHGA5P041600	0.0339013	1.78096	up	noncoding	TCONS_00014806	XLOC_006882	LincRNAs identified by Cabili et al	221	chr8	+	101464411	101468508		TTTGGGGGATTTCCAGTGACAGTCCTACTCTCACTCCATCACATCGCTTCTAAAATCTGA	intergenic							28.9885	21.2645	4.88885	4.05619	17.1247	45.8707	55.3372	24.392	24.7794	17.6894	19.5849	27.1296	15.168	24.0987	20.9064	31.8362	18.6607	15.744	22.4372	5.70468	4.32873	4.30414	4.08518	4.505	5.60456	6.21967	4.35884	3.91041
ASHGA5P033409	0.0339514	1.8628	up	noncoding	TCONS_00028099	XLOC_013450	LincRNAs identified by Cabili et al	450	chr20	+	6349443	6350307	TCONS_00022492	AATCCCCTGCATTTTCTTTGCATAATATGGAGTTTGAATTGAAGTGGTCCTGAATTTGAG	intergenic							47.5026	31.7316	5.4694	4.57193	20.8346	100.675	97.5697	34.4854	42.6876	30.9913	25.3101	27.467	37.3944	33.6945	23.1683	43.7026	38.967	14.9945	30.1998	5.94834	5.42957	5.14319	4.55959	5.2614	6.41684	6.62086	4.37545	5.2614
ASHGA5P016648	0.0339551	1.72142	up	noncoding	ENST00000432511	RP11-134P9.1	GENCODE	505	chr1	-	203270293	203274387		ACCATTCACGCCGTCTTCCTTCCTCATTGTGGTTTGGACCTTCTCGAGAAAGAATCTGGC	bidirectional	NM_006763	BTG2	protein BTG2	+	203274663	203278729	107.885	74.8785	6.58996	5.80636	109.225	240.958	163.22	112.937	99.5443	42.8811	37.2416	57.0696	49.7312	78.0035	74.5833	152.474	69.8652	51.1699	48.3226	7.90881	6.70441	5.93348	6.24424	6.44405	6.88948	7.20359	5.39161	5.69366
ASHGA5P022203	0.0342017	1.75789	up	noncoding	ENST00000552101	NOVA1-AS1	GENCODE	468	chr14	+	27251373	27275673		GGATTATCTTATGCCCTGTGGCATTTATCATTTTGGACCCTATCTCTCTCCTATCTATAT	intergenic							655.407	374.953	8.89955	8.0857	395.552	1493.49	1121.16	620.178	238.097	171.722	86.1889	1116.87	269.24	916.869	291.521	496.83	215.638	230.568	204.003	9.32717	9.35711	8.92978	8.803	7.73485	8.8865	8.38426	9.77371	8.16795
ASHGA5P044578	0.0343657	1.6938	up	noncoding	TCONS_00001181	XLOC_000447	LincRNAs identified by Cabili et al	588	chr1	+	163393105	163394820		AACTCTTCTGGATTTCTGTTGCGACTGATTACCATATAACGTCTCCTTTCCCCATAAGAT	intergenic							577.006	318.548	8.64237	7.88211	326.931	1813.16	745.803	759.659	262.803	111.331	77.679	518.678	305.09	464.703	306.105	622.101	201.764	187.614	142.459	9.12442	9.64199	8.25982	9.13991	7.87994	8.27605	8.24498	8.57188	8.33193
ASHGA5P023368	0.0344448	1.73739	up	noncoding	ENST00000579400	RP11-690G19.4	pseudogene	970	chr17	+	37394718	37401920		TTTCACTGGGACCCAACAAAGAGGACATCTCTCTTCCTGCAGGGGAAAATAAGAATGACT								42.6688	25.2925	4.97261	4.17569	17.2551	154.955	44.6263	44.8871	21.2509	8.76735	10.9087	38.7002	20.4572	32.195	26.9692	50.0964	18.917	20.8484	7.56452	5.71446	6.06209	4.02481	4.92787	4.3097	4.58483	5.31774	4.8394	4.3432
ASHGA5P026850	0.0345281	1.74885	up	noncoding	ENST00000578923	RP11-305N23.1	GENCODE	895	chr11	+	119252530	119369944	NR_034160	TTGGGTTTTCTGCTCTGTGAAATGAACCAGGTCCCTTATCCTGTTCTCCCCTGAAGAAAA	intronic antisense	NM_006288	THY1	thy-1 membrane glycoprotein preproprotein	-	119288654	119294246	635.812	385.672	8.95142	8.14502	273.767	1956.59	743.208	832.595	347.729	234.599	144.759	553.254	350.959	452.195	474.089	822.176	195.345	211.725	193.215	8.9359	9.74902	8.2535	9.27902	8.31605	9.30214	9.0892	8.68653	8.51091
ASHGA5P033165	0.0345945	1.81274	up	noncoding	ENST00000414640	RP5-956O18.3	GENCODE	1029	chr1	-	230416057	230417639		GTGATTTTAAAACGAGCCAGATTCATCCATTTCCCTCCTTACAGTAGTAGCAGCTCGCAG	natural antisense	NM_004481	GALNT2	polypeptide N-acetylgalactosaminyltransferase 2 precursor	+	230202955	230417875	1517.04	773.914	10.0203	9.16216	1250.13	5163.54	1711.53	1740.1	727.751	363.669	191.137	988.502	683.282	1027.53	768.956	1716.71	416.046	469.052	335.827	10.6455	11.2333	9.56414	10.3727	9.40441	9.90427	9.45539	9.58291	9.36743
ASHGA5P053658	0.0347582	1.99324	up	noncoding	ENST00000444956	RP11-384P7.6	GENCODE	486	chr9	-	33732972	33738414		CTCCATCCAGGACTGTTAAAAATCTCCCAAGGCAGAGACTTTTAGGCCTACATGTACTTA	intergenic							1028.53	649.002	9.89191	8.8968	1172.24	1847.74	1219.8	1161.99	672.619	768.595	567.956	817.317	1071.49	632.663	797.272	1015.36	245.77	400.365	380.087	10.5649	9.66778	9.05591	9.7668	9.27902	10.7748	10.73	9.29613	9.90528
ASHGA5P038396	0.0348719	2.06282	up	noncoding	ENST00000505467	RP11-71E19.5	GENCODE	374	chr3	-	126111875	126113431	ENST00000511287, uc003eit.1	AATCGTCCTTCCATTTTATGCAGTTATCCCAGACAATGATGCACAAGCTTTGGGAAAAAA	bidirectional	NM_182628	CCDC37	coiled-coil domain-containing protein 37	+	126113781	126155398	28.7973	19.2816	4.73154	3.68692	12.1612	82.3126	36.683	25.2815	15.9601	21.2293	12.0269	24.7241	25.0837	29.8997	18.6128	36.2445	8.81979	11.3107	5	5.24452	5.14999	3.79865	4.13443	3.94136	5.87131	5.47151	4.24053	4.64717
ASHGA5P054399	0.0349026	1.79348	up	noncoding	ENST00000458682	LINC00202	GENCODE	868	chr10	-	27220134	27223852		TTGAAAATTCTTTGCTCACTCTTCTTTTCTCACTTCCTCCCTCTCAGGACCTATAAAAGG	intergenic							2820.37	1497.09	10.9973	10.1546	1892.37	8935.63	2590.82	3742.98	1594.09	693.421	410.069	2703.59	1172.91	1939.93	1539.71	3389.61	839.194	900.356	697.922	11.0759	12.1563	10.2709	11.6318	10.6364	10.6382	10.3992	11.17	10.0084
ASHGA5P055457	0.0349258	1.78939	up	noncoding	ENST00000550226	GLYCAM1	GENCODE	781	chr12	-	55001970	55004246		CCAATTAGAAGAGACTACAGAACTGGCTCCCAGGGCTGGTATGAGCCAGGGAAGGGGCAA	intergenic							9.921	7.88185	3.5792	2.73974	9.38424	14.191	13.6278	8.66263	5.70183	10.0075	5.7065	12.0864	8.20763	8.84976	5	9.81175	7.67799	10.6258	5	4.89322	2.89282	2.77069	2.90783	2.82119	4.7779	4.17516	3.39483	3.16311
ASHGA5P039524	0.0349516	1.68099	up	noncoding	TCONS_00022439	XLOC_010775	LincRNAs identified by Cabili et al	278	chr14	+	25719559	25721093		AGCTGATGTGCCCAAGAACTGAGCCCAAGTCTTAGCACAAGATCTCCATCCATCAAATAA	intergenic							20.5394	15.0984	4.26884	3.51953	8.12349	51.9361	28.2617	23.45	12.2564	14.1208	7.00257	19.164	17.2326	17.3199	15.802	30.7067	8.32	9.47286	6.83509	4.69934	4.50373	3.52051	4.03304	3.64488	5.28531	4.54561	3.91833	4.0878
ASHGA5P026233	0.0350333	2.29493	up	noncoding	ENST00000568280	RP1-239B22.5	GENCODE	2883	chr11	+	17402195	17405078		ACAACTTTCTCCCTGTGGTGAATGTGACACTTAGAACAAGGTGCAGCCCTACTAAAAGCT	intergenic							51.3253	29.1033	5.57111	4.37266	14.0137	88.5182	118.646	38.7601	27.6179	46.9918	41.9332	34.1211	72.7981	24.5232	20.4134	29.9455	21.1971	19.337	15.5087	5.43681	5.25736	5.44375	4.71872	4.65235	7.02079	7.37286	4.66624	6.27762
ASHGA5P022340	0.0351328	1.60438	up	noncoding	ENST00000554852	MEG8	GENCODE	557	chr14	+	101361225	101373343		GCCCTGACAGCAGCTTGTGTTTCTTCCTTCAAGAGTCTGCTTAGAGATAATAAAGATCAA	intergenic							18.5929	10.7096	3.89269	3.21067	5	42.9986	22.647	23.6797	14.8158	9.02896	5.82568	24.7477	8.42352	13.2395	11.1441	18.2172	9.1761	6.12157	8.64559	2.62964	4.23536	3.28871	4.0475	3.85634	4.62986	4.21067	4.2434	3.19496
ASHGA5P052490	0.0352202	1.56334	up	noncoding	ENST00000521666	RP11-80G7.1	GENCODE	800	chr5	-	162910070	162921040	uc003lzi.3	CACTCAGGTTCTAATCATAGATTACCTTCCTTCTTCATCTTCCAGCTGTTTTCTAAAGTC	natural antisense	NM_001142556	HMMR	hyaluronan mediated motility receptor isoform a	+	162887516	162918953	47.91	33.1664	5.18703	4.5424	10.4717	88.5439	84.8789	84.858	46.1311	11.7859	8.4738	48.1362	24.3982	21.1366	26.5312	80.2344	25.3054	18.1175	36.4416	5.04563	5.25787	4.9369	5.83341	5.36055	5.02652	4.88722	5.14813	4.60456
ASHGA5P015029	0.0353206	1.82179	up	noncoding	ENST00000415836	RP11-1217F2.15	GENCODE	564	chr7	-	57288875	57289881	TCONS_00028205, TCONS_00028207, TCONS_00028418, TCONS_00028419	ATATCATTCTACACCAAAACCTCACGGGAAAAATCCTCCCCGACCCTCAGACTTAAACAG	intergenic							1181.65	716.294	10.0109	9.14557	2254.21	1922.42	1237.34	1024.13	972.84	595.555	599.308	847.375	671.838	849.155	865.58	1225.69	441.952	385.072	574.775	11.2598	9.71709	9.07787	9.58726	9.85249	10.4486	10.7909	9.35345	9.34175
ASHGA5P040230	0.0354982	2.42905	up	noncoding	ENST00000510225	RP11-327O17.2	GENCODE	637	chr4	+	170122944	170141500		CTCCCTCTAACTCTAACTCATTTTAACCTCATTTAAACTTTGAGGAAAAAGAACTCAAGG	intronic antisense	NM_020870	SH3RF1	E3 ubiquitin-protein ligase SH3RF1	-	170015406	170192249	64.7328	39.4244	6.07341	4.79301	48.8216	110.082	63.1028	70.1542	39.7114	58.5703	62.3712	65.0494	70.7696	43.372	37.375	62.7156	24.575	20.5765	16.5874	6.95385	5.55651	4.48586	5.56242	5.16624	7.34578	7.94057	5.57604	6.23055
ASHGA5P052815	0.0355436	1.54465	up	noncoding	uc003psf.1	AF520419	UCSC_knowngene	1957	chr6	+	108444839	108479222		CCTTACACCAGCACATGGTCTCTCTTTCCTGTTCATTCACTTTGGAAGACAGTCCTTGAA	intronic antisense	ENST00000440575	OSTM1	osteopetrosis associated transmembrane protein 1 [Source:HGNC Symbol;Acc:21652]	-	108366034	108487044	36.021	29.0374	5.05582	4.42854	16.9206	78.1411	43.628	45.9619	31.9568	19.8905	9.92468	41.7441	16.9241	37.4323	29.2147	51.8212	25.0245	20.1668	22.6782	5.68961	5.0747	3.99452	4.96224	4.85551	5.77593	5.15175	4.94234	4.0605
ASHGA5P018726	0.0356678	1.57079	up	noncoding	ENST00000456932	CSPG4P5	GENCODE	8555	chr15	-	84953013	84966399		ACCTCTGTGTGGCCATTCTCTTTGGCCACAATGGCAGCCTCAGCTCCCGCAACACCCTGG	intergenic							42.0914	26.0414	4.99283	4.34134	17.1098	49.6114	148.339	43.4934	25.7077	17.8354	7.15442	27.4803	27.0911	22.9476	26.7607	42.8061	21.8067	21.9703	18.9071	5.70337	4.43996	5.78306	4.8852	4.55411	5.61671	4.58418	4.37606	4.76539
ASHGA5P053674	0.0357211	1.56395	up	noncoding	ENST00000329395	ATP8B5P	GENCODE	2863	chr9	+	35406751	35483026		TCTACTCTGATGGAGATGGGACCTTCTATGGAGAGACCCTGAGCCTCCCTCCTTACCCTC	intergenic							4456.86	2602.06	11.7539	11.1087	6458.68	10434.5	5616.29	2384.69	2738.79	1418.56	1225.77	5377.6	2717.52	4870.87	2219.8	2650	2062.57	1753.79	1939.86	12.4893	12.402	11.5236	10.8911	11.4662	11.4628	11.5471	12.2491	11.0586
ASHGA5P045537	0.0358836	1.58321	up	noncoding	ENST00000452377	RP11-399H11.3	GENCODE	527	chr9	-	138096567	138129443		TGTAGAGTCTTGCCTTGGGCCTTCTCGAGTATCCCTTGATGTTCTGCCCAGGAGGAGGGT	intergenic							89.6535	53.0516	5.97795	5.3151	48.6341	100.805	314.919	74.6512	63.9786	16.0027	13.114	85.1235	29.2673	81.2739	53.4468	82.2481	45.1183	39.3109	40.6957	6.94966	5.43148	6.94368	5.6547	5.80698	5.46294	5.62007	5.95409	4.88899
ASHGA5P020240	0.0358861	1.54855	up	noncoding	ENST00000510198	CTD-2176I21.2	GENCODE	451	chr5	-	58142711	58159241		ATGAACTACTAACTTGTACACTCTCCTGCTTCTCCAGATACACTGAAAAAAGGCAGGCGG	intronic antisense	NM_138453	RAB3C	ras-related protein Rab-3C	+	57878938	58147406	56.8809	42.3746	5.59724	4.96632	12.4975	109.666	56.1939	75.6772	52.924	25.2034	16.9497	105.935	25.2994	69.5656	34.9766	66.7772	41.0095	28.4298	30.5643	5.27958	5.5508	4.32694	5.67365	5.5512	6.1162	6.01628	6.26324	4.65713
ASHGA5P026467	0.0359463	2.21923	up	noncoding	TCONS_00017322	XLOC_008165	LincRNAs identified by Cabili et al	220	chrX	-	49966652	49969247		TTTCTCTTCTATCTCCAGACCCTGAAAGAAATAAAAGGCATGCTAATCACCACACACACA	intergenic							14.4612	9.17599	4.10098	2.95092	10.1808	23.7264	16.1184	14.7098	9.37635	16.2598	14.6733	10.6449	16.0469	7.66513	11.3861	11.0114	5	8.12246	5	5.00669	3.50249	2.92991	3.4964	3.34391	5.48376	5.79207	3.25261	3.98649
ASHGA5P045750	0.0360936	2.14197	up	noncoding	ENST00000425587	RP11-561O23.8	GENCODE	340	chr9	+	70843566	70844228	ENST00000422178, TCONS_00016338	GGCAAATCAACTGTTAACTTTGCAGTTTTTATTTAATCTCCCAGGAATGTAACCCTTAAC	intergenic							392.826	242.33	8.50134	7.4024	267.703	910.317	420.495	449.872	210.639	280.03	192.929	410.624	387.451	259.43	276.909	442.283	85.2996	126.448	118.492	8.91586	8.62836	7.37881	8.3027	7.54853	9.54053	9.46326	8.23264	8.6425
ASHGA5P020540	0.0361422	1.82681	up	noncoding	ENST00000515513	RP11-267A15.1	GENCODE	776	chr5	+	173763297	173953457		GCAGTGTAAGTTCCCCTCCAGGTTTGCACAGCATCTGCTGAAGTCTCCACTAGAAACTCA	intergenic							178.748	119.075	7.35664	6.48731	208.789	398.173	208.485	171.874	141.425	75.3664	72.0524	153.821	134.996	180.592	115.677	183.773	77.416	61.6088	79.4655	8.65247	7.44096	6.31313	6.85847	6.96761	7.6911	8.13812	6.79129	7.1824
ASHGA5P021534	0.0362041	1.95773	up	noncoding	ENST00000534178	RP11-770G2.4	GENCODE	493	chr11	-	65556521	65557346		TGGCAGGAAGGATTCTCTCCTTGCCATGGGGATGAGGACAAATTCTCCCTTCATCCTTGA	intronic antisense	NM_004561	OVOL1	putative transcription factor Ovo-like 1	+	65554504	65564690	411.373	228.627	8.23941	7.27023	225.993	1266.72	466.686	594.419	169.277	119.925	66.6115	381.357	269.254	295.764	221.819	523.937	94.7965	113.544	81.2716	8.73231	9.13991	7.52394	8.74122	7.22722	8.38776	8.03776	8.12518	8.16831
ASHGA5P055561	0.0363835	1.86867	up	noncoding	ENST00000359455	LINC00615	GENCODE	1392	chr12	+	91332432	91342446		TTTCCTCCAGTTCCCATGAGCATGAGAGAAGAAGCAATGCACGCTCCGGCAGATTCCTAG	intergenic							25.7493	14.2284	4.47086	3.56884	12.2103	32.2283	91.938	15.273	15.4167	9.61514	16.4858	12.8272	18.9324	13.0385	14.1777	16.8451	13.8653	10.9918	11.748	5.25014	3.86738	5.05543	3.54216	3.90071	4.72248	5.96893	3.45962	4.22764
ASHGA5P039195	0.0364171	1.7995	up	noncoding	TCONS_00023667	XLOC_011468	LincRNAs identified by Cabili et al	391	chr15	-	47104361	47106170		TGCCCCATGTTGTGACCCCTTTCTATATTCTCCTTGTTGCATGTATAACTAGAGAGGCCT	intergenic							88.9182	60.3038	6.38948	5.54189	66.7626	196.31	142.021	80.7215	81.1553	48.9128	43.0796	52.3825	75.0879	43.3209	61.0882	94.7679	67.4587	42.1537	38.2492	7.3287	6.40482	5.71238	5.7636	6.15328	7.07735	7.4087	5.26705	6.33127
ASHGA5P031615	0.0364881	1.7228	up	noncoding	ENST00000570080	CTD-2270L9.4	GENCODE	730	chr16	+	23464078	23468909		ATCCACTCCTTCACGTCGAAGTCGTCTGCCAGGAACTTGGAGAAGTCCATGGCGGAACTG	natural antisense	NM_153603	COG7	conserved oligomeric Golgi complex subunit 7	-	23399813	23464512	28.6921	22.1937	4.82709	4.04233	10.6073	55.3224	50.0787	23.2282	20.0729	21.3087	18.7434	30.175	23.7558	31.2596	13.8486	37.5775	20.8345	15.1988	12.8811	5.06165	4.58997	4.16831	4.01863	4.2352	5.87747	6.16092	4.50455	4.56224
ASHGA5P053504	0.0365439	1.83307	up	noncoding	ENST00000517864	RP11-320N21.1	GENCODE	566	chr8	-	96081151	96085410		CAGAAGTTGTAAGAAAAGGAGGGAAAGCAGGCCAACCTCGAGGATCTCCCCAGCCTTGGC	intronic antisense	ENST00000286687	NDUFAF6	NADH dehydrogenase (ubiquinone) complex I, assembly factor 6 [Source:HGNC Symbol;Acc:28625]	+	96037295	96088396	5655.96	3172.84	12.1264	11.2522	5570.11	15168.5	6530.76	6393.36	2651.17	2695.98	1267.11	4970.7	3891.76	3843.67	3560.49	6375.66	1190.65	1925.74	1421.91	12.334	13.0458	11.7323	12.5769	11.3902	12.212	11.583	12.1374	11.4799
ASHGA5P035441	0.0368185	2.37124	up	noncoding	ENST00000458254	AC016751.2	GENCODE	306	chr2	-	176769098	176770230		CACAAAGGCTTCAAAGCAATCTCCCAAGTTTCCCAGAAAATAAATACATCTGATTTGAAA	intergenic							311.305	184.238	8.20737	6.96173	178.25	662.251	395.332	309.012	142.379	238.892	261.776	302.55	365.767	221.573	202.68	271.142	68.6317	83.1393	76.7322	8.49518	8.18599	7.27772	7.75725	6.97626	9.32507	9.86406	7.77743	8.56436
ASHGA5P029339	0.0369065	1.95394	up	noncoding	ENST00000557546	RP11-566J3.2	GENCODE	722	chr14	-	101142266	101146221		CAAAATATTCTCCTTTCTCTCCCTGTAAGGGGAATTTGAAAATCGGATTTACTGGTTAAA	intergenic							64.6226	43.2446	5.98032	5.01393	37.8812	153.55	72.8504	71.6876	45.5174	39.4647	45.9374	50.0921	59.0533	33.0066	40.3031	73.972	43.7514	34.1501	18.4758	6.68026	6.04637	4.6971	5.59903	5.34257	6.77287	7.49591	5.20846	5.96723
ASHGA5P041098	0.0370428	2.01475	up	noncoding	TCONS_00022289	XLOC_010634	LincRNAs identified by Cabili et al	382	chr13	-	61191693	61193076		AAGGAAGCATTAGCAGTGAGGAATAACTGTTCTCTCCCTAAACATACCACCCAAGGTAAT	intergenic							77.1934	49.8949	6.16021	5.14961	34.5378	203.397	93.5215	89.4041	50.3453	51.3894	40.9216	54.031	84.9521	41.6569	47.1606	93.558	30.1937	28.8863	22.8567	6.56799	6.45069	5.0793	5.90947	5.47624	7.15208	7.33622	5.30968	6.52036
ASHGA5P000167	0.0370547	1.87865	up	noncoding	chr1:4325150-4335375-	chr1:4325150-4335375	LincRNAs identified by Khalil et al	10225	chr1	-	4425290	4435515		TGGGGGCTCCATTTCCATCAACTTCCACTGATTTAGTCCATTTTCTTGTCAAGCCTAATG	intergenic							14.0358	9.40498	3.93667	3.02698	9.65062	14.4062	30.1435	6.94824	16.5038	10.4126	8.28162	15.9399	12.1136	19.9804	7.66967	9.69977	5	5.34753	6.02386	4.92854	2.91042	3.5904	2.70484	3.98087	4.83234	4.84419	3.70178	3.62117
ASHGA5P019881	0.037087	2.05358	up	noncoding	ENST00000504628	RP11-563E2.2	GENCODE	434	chr4	+	164038602	164040932		AGATTTACAGATACTACTTTGAAAACAAGATGAAAGCCATGGAATCTCCCGAGAAAAATG	intronic antisense	ENST00000509434	NAF1	nuclear assembly factor 1 homolog (S. cerevisiae) [Source:HGNC Symbol;Acc:25126]	-	164031224	164061489	466.789	290.58	8.72468	7.68654	302.985	1135.5	555.294	457.647	278.395	262.719	243.963	497.809	390.927	389.098	357.974	494.078	94.8566	157.448	149.681	9.03907	8.95001	7.78649	8.32672	7.96668	9.45606	9.76385	8.50851	8.65154
ASHGA5P028328	0.0370986	2.45611	up	noncoding	NR_033949	P2RX7	RefSeq	3819	chr12	+	121570630	121624354	NR_033948	AGCCCTTCTAGATTGTGTAGCATTTCATCAACAAAAATGACTCCAGGAGACCATTCTTGG	exon sense-overlapping	NM_002562	P2RX7	P2X purinoceptor 7	+	121570630	121624354	18.1765	6.27463	3.92405	2.62767	8.72284	12.6415	77.4854	5.36825	7.63949	12.9214	15.6328	5	13.6834	5	5.23899	5	5	5	5	4.79753	2.77446	4.79802	2.52563	3.12086	5.15156	5.88411	2.34018	3.77551
ASHGA5P056049	0.0370993	1.55063	up	noncoding	TCONS_00026623	XLOC_012682	LincRNAs identified by Cabili et al	383	chr18	+	53455839	53459177		AGCACTGAAGCCCAAGCACAAGCGGCCTGAGTCCCAGTGAGTCTAACCCCTCCCCATCCT	intergenic							1473.26	898.367	10.1141	9.48123	1516.86	4163.27	1767.02	1756.53	971.87	364.164	255.33	991.027	824.456	861.667	974.896	1745.93	733.319	682.572	465.732	10.8369	10.9032	9.61068	10.3899	9.85005	9.90698	9.82768	9.58726	9.58434
ASHGA5P048142	0.0374426	1.74758	up	noncoding	ENST00000531708	AP001258.4	GENCODE	880	chr11	-	58902762	58910488		TCCCGGTTTCCCCAGTCCCGAGTATTGGAAAGCGAGAGCGAAAGCGAAAGCATCCTAGTC	natural antisense	NM_001142519	FAM111A	protein FAM111A	+	58910317	58922511	224.005	118.025	7.26175	6.4564	73.6918	480.598	749.735	167.025	116.558	64.9023	53.3312	86.1959	194.881	119.24	77.3842	182.525	118.345	74.8067	58.9908	7.44827	7.70868	8.26708	6.81243	6.68058	7.4855	7.71924	5.97224	7.71672
ASHGA5P031584	0.0374532	1.98085	up	noncoding	ENST00000418743	RP4-749H3.1	GENCODE	785	chr1	-	20724597	20755232		GCTATGTTCTCTCCTTTCATTGTGCCATTTCATTCTCACCCCAAAATGAAAACACACAAA	intergenic							68.3981	47.1129	6.13586	5.14974	51.7679	113.868	99.9739	72.2486	55.7166	54.5454	47.9687	51.0958	62.839	37.4462	47.1188	80.9705	44.4286	30.357	26.63	7.02817	5.601	5.18351	5.60801	5.61935	7.23496	7.57583	5.23603	6.06226
ASHGA5P027944	0.0374613	2.10511	up	noncoding	TCONS_00012070	XLOC_005595	LincRNAs identified by Cabili et al	1481	chr6	-	6699945	6711350		TAAAGTCAGTTTGCTTACCGGCTTAGGTCTTTGTCTCTGACAATTTGCCTCTGTGACGTG	intergenic							11.9357	7.65738	3.73505	2.66115	21.7101	12.1356	16.5714	7.14234	17.66	6.70458	6.45919	7.1022	5.34845	5	5	15.6288	12.1368	5.48766	5	6.00235	2.73788	2.96023	2.72867	4.06475	4.18034	4.40742	2.79878	2.7021
ASHGA5P017051	0.03788	1.71691	up	noncoding	ENST00000437064	MFI2-AS1	GENCODE	306	chr3	+	196730507	196731609		CATTACCCAGATATCTCCCCACAAACCTAAACAATTTCGAGAGGGACTTGTGTTCTGCAA	intronic antisense	NM_005929	MFI2	melanotransferrin isoform 1 precursor	-	196728611	196756687	5582.99	3382.61	12.1691	11.3893	4183.44	13904.4	6459.49	7106.29	3105.43	2674.21	1772.47	5458.12	3626.48	3694.27	4057.14	6995.96	1375.18	2116.72	1812.5	11.9679	12.8573	11.7175	12.7548	11.6712	12.2002	11.9023	12.282	11.3887
ASHGA5P026385	0.0379677	1.50328	up	noncoding	ENST00000525654	RP11-347H15.4	GENCODE	524	chr11	+	50257749	50261299		AATCATACCAAGCTGAGACTGGGGTACACACTCTCCTCTACTGAAAAGTAGTGAGGGATT	intergenic							18.9552	14.4197	4.02905	3.44094	7.77789	39.7383	48.2966	17.9951	11.6282	5.40855	7.47927	13.3179	5	13.1446	10.4193	20.1336	25.1027	14.7676	12.3701	4.63704	4.13393	4.11876	3.72328	3.5862	3.86646	4.6639	3.50285	2.35685
ASHGA5P022513	0.0379956	2.05513	up	noncoding	ENST00000558235	RP11-219B17.1	GENCODE	543	chr15	+	60771405	60922715		GTGACCTCAGGTCACATCTCCCAAGAAGCAGTAATGTTCCAGCAATAAGAAAAGGACAGT	intronic antisense	NM_002943	RORA	nuclear receptor ROR-alpha isoform c	-	60780482	60919729	826.338	490.784	9.41562	8.37639	434.327	2177.3	916.801	1010.38	396.973	326.562	250.905	1097.46	557.72	608.505	589.346	1091.31	134.751	235.748	218.106	9.43528	9.93569	8.59252	9.56519	8.50698	9.75602	9.79484	9.73841	9.10834
ASHGA5P042990	0.0380662	1.6172	up	noncoding	ENST00000440034	RP11-89N17.4	GENCODE	1005	chr7	-	33835079	33842768		AGTCAATTCTCTCCCTCAGTGCCCTCATGTGTATAAATTGCATATCATATGGCATTTTTT	intergenic							340.503	249.241	8.29432	7.60082	187.812	794.147	405.544	419.021	238.034	184.214	154.511	340.741	312.828	289.445	218.071	417.291	185.157	162.49	159.403	8.54548	8.44455	7.31977	8.20142	7.73391	8.98478	9.17483	7.94981	8.367
ASHGA5P039238	0.0380883	1.91627	up	noncoding	TCONS_00023687	XLOC_011486	LincRNAs identified by Cabili et al	646	chr15	-	58572414	58576475		TTGGAATATTTGTCTTCCCTTCTTTGACGCTGCAACTTGGAAATGAAGCCCAGCCTCAGT	intron sense-overlapping	ENST00000558239	ALDH1A2	aldehyde dehydrogenase 1 family, member A2 [Source:HGNC Symbol;Acc:15472]	-	58306055	58766112	41.345	29.2461	5.37891	4.44061	14.2564	82.2578	50.0327	45.429	37.0722	37.9719	29.2962	34.4442	34.8139	31.6539	26.5496	50.8447	26.8741	17.4368	16.5496	5.46133	5.14836	4.16711	4.94554	5.06313	6.71768	6.85162	4.67649	5.14721
ASHGA5P045677	0.0382021	2.44253	up	noncoding	TCONS_00001844	XLOC_001229	LincRNAs identified by Cabili et al	407	chr1	-	225071655	225072471		AAGGGTAATTGGATCACCGGAGAACTCCTGAAAGATTTATCTCCCTGGAGGTACTTCCAT	intergenic							74.7624	41.9216	6.05063	4.76225	33.973	210.531	87.7593	77.6061	25.218	70.5896	35.5135	56.9083	77.1457	46.5692	33.7525	86.6691	10.6743	22.9278	15.7126	6.54608	6.50004	4.98769	5.71266	4.52848	7.61238	7.13139	5.38629	6.37603
ASHGA5P021356	0.038344	2.308	up	noncoding	ENST00000530792	CTD-2562J17.4	GENCODE	495	chr11	-	74919098	74952218		GAAATCCTCATGAAGATCCAGCACCTTCCAGTTAGCCCATCTATGAGAAAACCAATGCTC	natural antisense	NM_001195528	TPBGL	uncharacterized protein LOC100507050 precursor	+	74951949	74954749	25.3081	14.8965	4.82142	3.61478	16.625	31.3057	28.3341	25.8747	24.4404	28.7625	32.7568	14.3658	11.4728	14.7471	17.516	20.5044	15.9509	13.8072	10.2771	5.66251	3.83113	3.52332	4.16197	4.48232	6.31222	7.01299	3.58492	3.55521
ASHGA5P022096	0.0384174	1.71168	up	noncoding	ENST00000549032	AC096558.1	GENCODE	427	chr2	-	144052989	144238358		ATCAGAGACTCCTCAAAGCCTGCCTGGCAATCTGTTTTTTATGGTCTCTTCTCCTCAACA	intronic antisense	NM_018460	ARHGAP15	rho GTPase-activating protein 15	+	143886898	144525921	28.4329	21.9655	4.78384	4.00842	13.1575	58.4387	55.5102	24.415	18.1003	21.1305	14.8326	21.8786	21.6068	26.0612	16.4456	43.9078	20.352	13.6472	11.7378	5.35187	4.67039	4.309	4.08626	4.10052	5.86475	5.80853	4.07937	4.41837
ASHGA5P057377	0.0384254	1.69576	up	noncoding	TCONS_00016481	XLOC_007860	LincRNAs identified by Cabili et al	653	chr9	-	131097665	131100554		TATGCACACCAGGATTCATTCAAGGAGCTCAGAACAAGGTTTCCCTCCTGAAAAGTCCAT	intergenic							602.48	332.664	8.71964	7.95771	453.74	1969.94	667.233	690.76	273.247	133.093	80.5938	551.225	331.518	475.125	285.253	659.016	197.906	209.463	170.363	9.48634	9.76385	8.0673	8.9926	7.93537	8.5503	8.28468	8.6767	8.43779
ASHGA5P049823	0.0384543	1.56839	up	noncoding	ENST00000420427	AC004562.1	GENCODE	665	chr17	+	67957902	67979679		TTTTCTTCCTTCCATGATATAGATATATTGATCATGAGGAGAGGGCTCACCCCTCACCCG	intergenic							89.0622	59.9048	6.11874	5.46945	43.7597	289.861	121.271	98.1374	51.0522	21.5813	27.5767	59.2586	50.0964	66.3084	46.2668	124.806	56.7306	38.0004	37.1243	6.84115	6.98875	5.48067	6.05013	5.49716	5.89868	6.75176	5.4416	5.70821
ASHGA5P057274	0.0385043	1.54466	up	noncoding	TCONS_00015165	XLOC_007211	LincRNAs identified by Cabili et al	249	chr8	-	127643996	127651364		CAATTTACAGGAAGAGACTCATTCTGGTGTAGTCATGCCCCATTGAACAGAGCCAAACCT	intergenic							11.2346	6.81764	3.25171	2.62442	6.24039	21.1621	11.638	17.107	7.50172	5	5	16.228	5	7.27575	5	12.2612	5	5.82497	7.36149	4.32416	3.37123	2.64376	3.6661	3.10232	2.57053	2.61568	3.71991	2.35685
ASHGA5P056760	0.0386096	1.50504	up	noncoding	TCONS_00008462	XLOC_003922	LincRNAs identified by Cabili et al	243	chr4	-	34834395	34848387		TCAGCTCCTGGTTATCAATGCACATTTAACTTGTGCATTTAACTACAATGGAAATACTGT	intergenic							9.25799	6.42137	3.12833	2.53854	5	14.436	6.42149	10.4468	11.9032	5	5.69602	15.1604	5	10.3227	5	8.37171	6.04761	5.20758	5	2.62964	2.91331	2.37838	3.10801	3.61243	2.57053	4.17149	3.64289	2.35685
ASHGA5P039457	0.0386192	1.92828	up	noncoding	ENST00000505930	RP11-542G1.1	GENCODE	469	chr4	-	76194277	76286392		GGTTCATCTTCCTCTCATTGTATCACAGGGCTACTTGATTGTATTTCAGTATTCAATTTA	intergenic							151.72	82.0706	6.787	5.83969	56.604	420.926	210.169	214.285	34.5477	39.0121	37.2576	200.961	85.0676	187.069	61.2382	112.263	42.4638	41.7014	44.6911	7.13438	7.52939	6.32923	7.19441	4.9658	6.7545	7.20511	7.18321	6.52386
ASHGA5P054900	0.0387071	1.63347	up	noncoding	TCONS_00016434	XLOC_007800	LincRNAs identified by Cabili et al	4024	chr9	-	100638611	100658103		TAAAAGGAGCTTAAAAGTTTGCCTGCTTTCCTTCTTGGACTCACGGTCCTCTGTGACCAA	intergenic							31.7442	23.3258	4.7953	4.08735	28.6115	52.3508	63.3541	35.6367	30.2974	7.21287	8.86178	27.6285	9.72941	26.9387	18.6552	45.0941	24.8318	16.1943	21.8374	6.33592	4.51609	4.49174	4.60551	4.78029	4.2841	4.96372	4.38501	3.36246
ASHGA5P037589	0.0387479	1.6853	up	noncoding	ENST00000494740	PI4KAP2	GENCODE	2273	chr22	-	21827364	21842196	ENST00000430523, ENST00000452110, ENST00000452435, ENST00000462560, ENST00000463608, ENST00000470274, ENST00000477296, ENST00000486209, NR_003563	GGGTGCTCCTGTTGAAGAGTCCTTTTCCACTCCTCAAAACAGACCACTCGTCCTTGCCCG	intergenic							61.3413	46.7861	5.86923	5.11622	21.6929	108.574	118.099	50.1395	49.3298	59.3666	26.8687	56.6597	42.5536	62.174	34.9917	77.3733	54.9265	26.6594	28.8244	6.00035	5.53578	5.43437	5.08069	5.44885	7.36365	6.70995	5.38016	5.46518
ASHGA5P017307	0.038807	2.09817	up	noncoding	ENST00000440013	ZMYND10-AS1	GENCODE	250	chr3	+	50378536	50383128		TTTGCTGAAGCAACACACTTGGCCTACCCACTGGGTGGGGCAGGAAGTCTCCCATATCGA	natural antisense	NM_015896	ZMYND10	zinc finger MYND domain-containing protein 10	-	50378536	50383156	108.886	63.6885	6.49513	5.426	60.7863	336.331	176.26	79.8679	61.736	50.5693	37.6175	67.9224	77.2533	80.7342	92.4377	117.091	23.3277	29.1561	25.8194	7.21146	7.20009	6.05098	5.75423	5.75477	7.13269	7.21709	5.6397	6.37815
ASHGA5P044647	0.0389427	1.72349	up	noncoding	ENST00000523246	RP11-115J16.1	GENCODE	674	chr8	+	9107049	9183486		TTCATCCTTCCCCTGGTACAGAAGAGCTGCGTCAGTCATTCTCTCTGTGATCTACTGATA	intergenic							127.933	89.7854	6.91815	6.13282	99.8877	276.282	182.63	125.452	68.8643	70.8925	63.5127	135.944	95.7418	141.125	74.91	113.671	73.5509	60.8955	68.6036	7.80326	6.91736	6.10374	6.40379	5.91546	7.61524	7.96836	6.61803	6.69544
ASHGA5P029469	0.0390578	2.11312	up	noncoding	TCONS_00010297	XLOC_004775	LincRNAs identified by Cabili et al	528	chr5	-	34651581	34652810		AAACTCTGATATTGACCTCATTACTTCTCCCCGTTCTGCAGGCAGAAGACTGCTATGAGA	intergenic							528.832	311.552	8.86752	7.78814	678.886	1185.48	613.527	513.173	241.769	287.552	264.48	445.788	372.084	422.998	382.467	573.736	129.988	125.684	173.91	9.95808	9.00999	7.93488	8.49119	7.75681	9.56805	9.8777	8.34345	8.58696
ASHGA5P019944	0.0390595	1.73277	up	noncoding	ENST00000505660	ABCA17P	GENCODE	476	chr16	+	2391119	2395934		CCCCAGCCGGAAATGAAAATTGGACATTTGACATTTGAACCTCTCTCCTGTGTTTGGAAA	bidirectional	NM_001089	ABCA3	ATP-binding cassette sub-family A member 3	-	2325878	2390747	67.1562	45.3558	5.94749	5.15441	65.7623	113.63	131.824	67.4273	30.3408	28.8064	27.3885	72.0701	47.4895	64.8032	40.3912	54.5109	36.0203	34.0941	40.1817	7.31172	5.59746	5.60362	5.50929	4.78275	6.31535	6.73986	5.71988	5.62254
ASHGA5P044419	0.0390686	1.69468	up	noncoding	TCONS_00018409	XLOC_008693	LincRNAs identified by Cabili et al	1038	chr10	-	3346788	3356010		AACATTGATTTGGGATGTTTGCAGCTCTTCTTGGGGGGTACATGGATGTGTGTGATGTGT	intergenic							11.9314	9.47289	3.83297	3.07196	8.08412	18.5049	11.9778	13.4595	11.5115	11.4541	7.44311	13.0159	6.27049	8.7531	9.70279	14.3362	9.31737	10.8282	7.1021	4.69279	3.21836	2.66419	3.39984	3.57314	4.98456	4.6552	3.4757	2.854
ASHGA5P014862	0.0391107	2.05657	up	noncoding	ENST00000414120	RP11-513G11.1	GENCODE	2880	chr3	-	194018987	194030589	uc003ftr.2	TGCTTGGCAGGTTCCTATCTCCCTTCGACTGAGGCATCGTTTCCAAATCAGACACTTCTC	intergenic							553.252	315.859	8.76052	7.72029	249.691	1753.11	476.88	799.055	251.239	232.849	164.84	498.357	483.903	340.151	278.911	713.855	120.768	164.211	109.211	8.84446	9.58997	7.55174	9.21992	7.81701	9.29201	9.25963	8.50944	8.91365
ASHGA5P000495	0.0391327	1.80357	up	noncoding	chr7:149967450-150001750-	chr7:149967450-150001750	LincRNAs identified by Khalil et al	34300	chr7	-	150336517	150370817		ATAATTAAGAATTCAGGAGATGTTTAACTTCAAGCTCTCCCTCACTATTTAAACTCCCCA	intergenic							548.832	310.607	8.64553	7.79468	316.557	1687.62	687.615	674.964	197.503	175.359	86.785	564.253	291.91	479.631	311.078	633.653	157.771	175.469	124.737	9.08662	9.53256	8.11605	8.96306	7.44982	8.91429	8.39375	8.70812	8.27514
ASHGA5P045142	0.0391477	1.63575	up	noncoding	NR_038064	PLIN2	RefSeq	2116	chr9	-	19115758	19127604		CTTTCTCTCCTTTTGTGTTTTGAGAGATTAATAAGCATACCCTCCCTACTTTGATTGCAG	exon sense-overlapping	NM_001122	PLIN2	perilipin-2	-	19115758	19127604	305.968	208.649	8.04231	7.33235	193.761	724.086	408.584	403.49	129.978	135.502	95.1251	357.216	214.373	339.503	179.369	307.929	136.6	136.119	146.648	8.5819	8.31799	7.33364	8.14332	6.84597	8.57505	8.51838	8.02219	7.83759
ASHGA5P021365	0.0391521	1.53562	up	noncoding	ENST00000530972	RP11-91P24.6	GENCODE	712	chr11	-	77577457	77581137		AAGTAGACAGATGGAGTCTCACTCTCTCACCCAGAGCTCACATTCTAGTAAAATGAAACA	natural antisense	NM_024684	C11orf67	UPF0366 protein C11orf67	+	77532207	77583398	22.1686	17.1865	4.42459	3.80577	7.08174	49.5822	29.1919	23.9222	15.5419	11.4364	12.5124	28.0799	15.1748	18.3634	19.9075	23.1997	14.4297	18.6629	10.5676	4.50296	4.43889	3.5561	4.06265	3.90997	4.98064	5.53531	4.41021	3.91106
ASHGA5P036940	0.0393566	1.55135	up	noncoding	TCONS_00025395	XLOC_012210	LincRNAs identified by Cabili et al	1693	chr17	+	41455316	41458968		ATGCAACTCCAGGTCCTGCTATTTCTGTTTTTCTTGGCCCTGATTGCACTTCAGTTTTCG	natural antisense	ENST00000341011	AC087650.2		-	41447212	41466266	19.1288	14.5525	4.10349	3.46997	9.35687	38.819	37.0845	24.3133	14.0382	5.48758	6.7191	17.2117	5.19699	8.25257	17.2844	32.5406	11.0579	14.1178	13.4176	4.88922	4.10081	3.81058	4.08101	3.79362	3.88986	4.47983	3.78304	2.67746
ASHGA5P026281	0.0393832	1.63541	up	noncoding	ENST00000525871	RP5-1024C24.1	GENCODE	439	chr11	+	30605709	30606507		TGGAGGCCACGGGATCTCCCCCTCTTCTGACATCTTTTTTCACTTAAACTTTTGTTTGTC	intronic antisense	NM_001145399	MPPED2	metallophosphoesterase MPPED2 isoform 2	-	30406039	30607930	3992.68	2503.04	11.716	11.0064	3546.93	8527.91	4346.56	4383.78	1568.72	3318.53	1669.8	4579.18	2917.48	3903.51	2554.32	3703.33	1437.19	1596.29	1409.14	11.7814	12.0597	11.1079	11.9023	10.611	12.4328	11.8385	11.9946	11.145
ASHGA5P002509	0.0394631	1.91304	up	noncoding	NR_049762	MAPKBP1	RefSeq	7008	chr15	+	42066631	42120053		ATTCTTCCTGCGTCTGGAGTGTGGAGGACCTCATTAAAATCATCTATGTGGATGGGAACA	exon sense-overlapping	NM_001128608	MAPKBP1	mitogen-activated protein kinase-binding protein 1 isoform b	+	42066631	42120053	26.5586	19.6784	4.82828	3.89241	28.754	38.93	34.6318	25.3828	22.199	16.155	16.6594	29.757	21.1169	31.8069	14.9823	26.6663	19.4887	11.5689	12.1191	6.34105	4.10352	3.73545	4.13908	4.36062	5.4738	5.98621	4.48647	4.3841
ASHGA5P057465	0.0394974	1.64351	up	noncoding	TCONS_00018120	XLOC_008380	LincRNAs identified by Cabili et al	269	chr10	+	8083980	8084832		GACAAAGGGCTACAAGGCTGGTGAATAAATTATCTCCTTCCTCCCCCACTTCCTCCCCAT	intergenic							12219.4	7360.47	13.3565	12.6397	22164	21389.9	12326.2	9701.37	10569.1	5840.74	6563.58	9200.5	8224.7	8079.69	9714.17	12042.3	3993.85	3190.25	6278.31	14.257	13.6759	12.8125	13.2979	13.5622	12.9929	13.0458	13.2079	12.2678
ASHGA5P017918	0.0395455	1.51331	up	noncoding	ENST00000447119	RP11-790G19.2	GENCODE	613	chr10	-	72976980	72977969		AATACACATTCTCACCCCCCACACACTCCTTAATACATACTCTCACTTGGAGAAGTGAGC	intronic antisense	NM_001244889	UNC5B	netrin receptor UNC5B isoform 2 precursor	+	72972291	73062635	498.48	371.036	8.82868	8.23098	317.397	995.957	700.096	688.288	305.901	261.737	190.867	527.6	427.034	467.499	329.558	489.239	268.017	279.919	335.983	9.08988	8.78165	8.14708	8.98683	8.11993	9.4486	9.45337	8.60213	8.76724
ASHGA5P033288	0.0396147	1.55381	up	noncoding	TCONS_00028425	XLOC_013777	LincRNAs identified by Cabili et al	2413	chr20	-	47032442	47035369		TTTGTAGACACGTCTAACTGTTACTCAACGCTCCTGCTCTCTTCTTTGATATCAACAGAA	intergenic							45.4918	35.8751	5.3459	4.71009	24.4141	77.8929	86.6695	55.4243	45.8617	23.8016	9.45841	40.4122	14.0169	41.1481	35.365	65.0399	33.7129	25.6483	36.1943	6.13938	5.07032	4.97046	5.22414	5.35322	6.03778	5.07347	4.89842	3.80531
ASHGA5P051028	0.0397513	1.63183	up	noncoding	ENST00000421019	RP11-290F20.3	GENCODE	686	chr20	+	48894070	48894952		AAACACTTGGGAAGCAATGCAAGCGTGCGTGCATGGATAAGTATTTCTTTGGCAGATGAG	intergenic							17.6901	7.99585	3.34209	2.6356	5	52.3225	32.8525	14.1034	12.2123	5	5	15.0301	5	5	5	18.3105	11.9041	5.75634	5	2.62964	4.51522	3.68259	3.44863	3.64148	2.57053	2.61568	3.63294	2.35685
ASHGA5P021017	0.0398673	2.20794	up	noncoding	ENST00000523434	RP11-6N13.1	GENCODE	486	chr5	-	104074954	104109397		TTACTTAGAGGGTGGATATCCTCCTCCACTGAATGCAAACTATTAAGTAATGAAAAGACA	intergenic							26.2272	11.2988	4.3724	3.2297	21.0208	34.6025	99.0998	7.78167	9.52486	6.62068	16.1371	15.0303	12.4268	22.4134	12.167	14.414	6.88762	5	5.7824	5.95996	3.95305	5.16845	2.80683	3.35979	4.16093	5.93715	3.63303	3.65179
ASHGA5P019466	0.0399542	1.6049	up	noncoding	NR_026699	GLYCTK	RefSeq	3800	chr3	+	52321835	52329272	NM_145262, NR_026700, NR_026701	ACAGCTGATGACCTGCTGCTCGTGCTGATCTCAGAGGTGGGGGTTCAGCTCTGCTGCCTG	exon sense-overlapping	NM_001144951	GLYCTK	glycerate kinase isoform 2	+	52321835	52327021	65.4937	43.4611	5.59556	4.91307	38.1752	123.275	153.453	62.696	54.2252	11.712	7.96827	72.4452	14.7174	70.3627	36.2899	80.3894	44.6764	30.5418	27.25	6.69137	5.72372	5.8361	5.40562	5.58707	5.01748	4.77516	5.72794	3.8669
ASHGA5P054514	0.0399545	1.85442	up	noncoding	NR_038986	GRID1-AS1	RefSeq	2102	chr10	+	87337487	87366972		GGACCATTGGAAGAACTAGTTAGTAATTAATCAGTTGCATAATCTTCCCTTATCCTCTTT	intronic antisense	NM_017551	GRID1	glutamate receptor delta-1 subunit precursor	-	87359311	88126250	18.8468	13.0394	4.21706	3.3261	6.12447	34.1863	29.1966	26.8909	14.2954	11.2973	9.10153	19.6817	29.6423	17.7372	14.8603	11.5415	5	7.11576	5.37866	4.29999	3.93974	3.55619	4.21632	3.81423	4.95737	5.00669	3.946	4.90679
ASHGA5P022833	0.0399641	1.64674	up	noncoding	NR_040000	LOC339166	RefSeq	1851	chr17	+	5675553	5834016		AATGACCAAGGTCTTCAGTGTTTTGGCCATCTCCCTACCTGATCACCCTGAAGCAACACC	exon sense-overlapping	ENST00000573619	WSCD1	WSC domain containing 1 [Source:HGNC Symbol;Acc:29060]	+	5676245	5984112	1416.61	915.92	10.1343	9.41472	582.993	2881.16	2493.51	1044.77	870.379	482.462	313.451	2664.18	1031.52	2234.1	583.462	870.277	625.747	635.236	431.097	9.78558	10.3844	10.1946	9.61136	9.67944	10.2091	10.0611	11.149	9.85723
ASHGA5P019075	0.0400328	1.80341	up	noncoding	NR_033201	HOXB-AS3	RefSeq	570	chr17	+	46667822	46683774		TCCAGTAAGAAGTTGGGCCAAGCTGGAAGGGATTGACCGGCCGTTTCCTCTCCCTCGCCG	intronic antisense	NM_002147	HOXB5	homeobox protein Hox-B5	-	46668618	46671103	288.314	178.371	7.97176	7.12103	438.039	527.205	505.634	212.62	139.915	116.405	125.651	241.039	130.493	305.473	137.849	228.051	128.529	133.109	185.094	9.44538	7.85064	7.64919	7.1797	6.95268	8.34435	8.91116	7.44096	7.12853
ASHGA5P034865	0.0401843	1.57703	up	noncoding	ENST00000414654	AC092580.3	GENCODE	469	chr2	-	7811734	7812377		TTGTTCTTTTTCTACCCATAAGGGAATGATTCAAAATGTCCCTCCACCTGGGTCCAACCG	intergenic							250.74	179.377	7.76642	7.10921	137.975	498.08	396.374	295.131	114.756	100.826	83.2272	379.552	181.429	312.208	159.777	245.447	130.656	107.665	118.458	8.18818	7.76324	7.28222	7.67211	6.65522	8.11862	8.33318	8.11862	7.61672
ASHGA5P050640	0.0402233	1.58401	up	noncoding	ENST00000421820	AC018866.1	GENCODE	470	chr2	-	121466838	121468093		TGCCTGTTTATTGAGGGCTCCGGAGTGCTCTTCAAAACCATCTTCCTGCCCTTTTCGGCA	intergenic							281.735	171.84	7.65428	6.9907	160.751	903.362	359.255	329.872	161.062	60.4776	39.775	239.327	111.305	213.374	164.606	371.465	108.455	123.727	109.947	8.36344	8.61406	7.12403	7.85324	7.15715	7.38901	7.30121	7.4321	6.90889
ASHGA5P031614	0.0403431	1.66951	up	noncoding	ENST00000451829	RP11-444D13.1	GENCODE	364	chr1	-	183723552	183724072		TATTGAGTCATCACTGGTAAGTAGCAGCTCAGCCAGAGATTACATCTCCCCATCACACAT	intronic antisense	NM_015149	RGL1	ral guanine nucleotide dissociation stimulator-like 1	+	183605207	183897666	6039.6	3803.52	12.2911	11.5517	4843.51	15002.3	7379.6	6488.57	3409.16	2840.9	1722.12	6630.67	4834.05	4697.88	4222.07	7236.15	1619.51	2101.45	1913.51	12.1582	13.0274	11.9435	12.6127	11.844	12.2768	11.8659	12.6002	11.7323
ASHGA5P027621	0.0403448	1.61779	up	noncoding	BX088953		LincRNAs identified by Khalil et al	651	chrX	-	43223540	43224184		TAACATGTTGGCTATCTTCTATTTTTCCCCACTTCTCTACCTTGCTCTATGCTCCTGGAG	intergenic							94.1065	72.1795	6.51499	5.82097	72.3865	176.514	118.823	120.542	96.7784	47.5001	41.804	78.5048	61.2378	64.4945	73.6811	123.891	69.4777	56.5717	55.9031	7.42431	6.25093	5.44602	6.34347	6.40804	7.03698	7.36762	5.84257	6.02435
ASHGA5P032756	0.0405575	1.85518	up	noncoding	AA309472		LincRNAs identified by Khalil et al	320	chr11	-	71083066	71083386		TACTAGAAAAAGCTGGATCTCCCTCAGGTGAAGCAGCAAACTCAGGGGGGATGGGAAGCT	intergenic							612.667	378.169	8.98292	8.09136	267.774	1630.39	788.255	754.635	239.012	325.121	186.493	709.654	652.595	572.061	328.268	506.773	177.86	262.285	147.342	8.91681	9.47946	8.34965	9.12699	7.74059	9.75044	9.41811	9.08131	9.30307
ASHGA5P040518	0.0406334	1.79709	up	noncoding	ENST00000523413	RP11-107N7.1	GENCODE	700	chr5	-	77238588	77242248		CTTATCCTTCTTGCCCTTGATGTTACCAATCACCATATGTCTTCAACAGAGCATGCCAAG	intergenic							38.2251	26.9527	5.17617	4.33051	48.9875	63.8914	58.5594	39.4796	34.1484	11.8191	16.0487	32.8667	20.5067	25.6327	32.518	52.3332	19.4038	22.5513	15.723	6.95899	4.79527	4.38629	4.74394	4.95118	5.02959	5.92895	4.61514	4.3463
ASHGA5P015232	0.0408676	1.68523	up	noncoding	ENST00000418209	IGKJ5	GENCODE	253	chr2	-	89130699	89161435		GAAATCAAACGAAGCAGTTTTGCATCAGTAGCTGCATCTCCTCCATGATTCTAGCTGCCA	intergenic							210.745	143.927	7.49621	6.74327	185.048	550.659	278.606	227.168	137.259	80.9656	57.6326	168.619	131.832	223.677	143.809	255.198	77.2698	93.2927	82.4128	8.53146	7.91865	6.74996	7.28186	6.92664	7.80782	7.82666	6.92664	7.14991
ASHGA5P036398	0.0409796	1.67249	up	noncoding	TCONS_00026336	XLOC_012683	LincRNAs identified by Cabili et al	1359	chr18	+	53497614	53506331		AAGGCTGTCACTGTCAATTGCATGGCTCCCTCACTATGCATTCCTTCTATCAATTTACGA	intergenic							94.0034	70.1418	6.46254	5.72054	46.5814	211.055	131.64	104.978	60.0094	50.931	45.384	101.449	93.4164	95.7195	55.4685	113.109	47.8518	49.1421	36.2849	6.90344	6.50564	5.60268	6.14805	5.71988	7.14115	7.47675	6.2027	6.66129
ASHGA5P029694	0.0410865	1.5777	up	noncoding	TCONS_00008949	XLOC_003803	LincRNAs identified by Cabili et al	303	chr4	+	184434392	184478022		TGCAAATCTGAAGCAGATACAGATGCTTATACACACATGAGAGTATCTCCTGCCCCCAGT	intergenic							84.1702	61.2005	6.21462	5.55679	82.6258	164.118	127.399	86.052	54.8101	25.114	24.3074	108.935	50.7437	110.355	44.2383	67.9833	51.2692	49.1136	54.7006	7.58946	6.15119	5.55438	5.85538	5.60011	6.10976	6.55739	6.29927	5.72887
ASHGA5P039894	0.0411031	2.31577	up	noncoding	ENST00000532680	RP11-539G18.2	GENCODE	517	chr4	+	39640800	39652934		CCCTTTACCTTAACATTTTTGCACCGGAAACGACCAAAATTAAGTTCAACAGGAATATTA	bidirectional	NM_174921	C4orf34	uncharacterized protein C4orf34	-	39552545	39640481	23.8037	11.8406	4.56052	3.34903	35.0976	16.927	58.8461	13.3235	24.5902	12.1914	17.5836	11.8698	10.2578	15.3209	16.0783	16.1733	8.90895	5	11.1448	6.58886	3.10766	4.39277	3.38814	4.49134	5.07079	6.07151	3.37309	3.42314
ASHGA5P048400	0.041144	1.51059	up	noncoding	ENST00000420876	RP11-511I2.2	GENCODE	483	chr1	-	47846599	47874149		GTGGCTAGAAAAGAAAGTTTATTTCCACTGCAGGAAGCACTGCCTCCCATCTGAGAAATG	intergenic							235.125	162.976	7.48642	6.89131	148.893	632.739	458.001	221.473	165.464	59.0698	44.6679	150.695	123.094	290.506	131.001	289.444	135.51	101.699	69.5782	8.27514	8.11862	7.49846	7.23867	7.1933	7.35644	7.45184	6.75886	7.04325
ASHGA5P019267	0.041165	1.81084	up	noncoding	ENST00000475886	RP11-129K20.2	GENCODE	758	chr3	+	62936104	63109888		CGGTTTTACGGTGGTTATGTTGAAGATGTAAATATTCTCCCTGCTGTGAGTATTACTGCA	intergenic							211.625	128.551	7.39367	6.53701	96.936	683.153	246.36	256.468	91.4502	83.2366	64.8275	170.572	155.63	170.801	124.695	246.834	67.759	79.3673	54.7748	7.77282	8.23513	6.56304	7.47057	6.32389	7.8461	7.99541	6.94238	7.38575
ASHGA5P017429	0.0412427	1.71404	up	noncoding	uc004exm.3	MGC16121	UCSC_knowngene	648	chrX	-	133678456	133680653		GAGCAGGTAGAATGTAAACAATTGAAAAAAATCCCTTCCCAATCAGAATACCACCCACAG	intergenic							200.145	127.257	7.33983	6.56243	126.601	626.784	195.47	258.758	126.715	75.3148	51.4701	140.051	131.146	138.994	124.936	264.088	82.5981	81.8787	67.1578	8.08159	8.10424	6.21123	7.4855	6.80503	7.68977	7.67494	6.66633	7.13484
ASHGA5P027647	0.0412677	1.60385	up	noncoding	ENST00000536910	RP11-87C12.4	GENCODE	434	chr12	-	122337853	122338900		AAATGAGCCCCAAGAAGAGATCCTCTCCCTCTCTTGGGACATTTATCATCTTCTGTCACT	intronic antisense	NM_001261400	PSMD9	26S proteasome non-ATPase regulatory subunit 9 isoform 2	+	122326636	122355771	673.373	447.42	9.06838	8.38684	442.957	1964.46	764.585	838.39	379.567	211.73	169.156	616.137	431.523	660.934	357.247	914.815	239.632	299.827	227.963	9.45539	9.75602	8.30396	9.28624	8.43177	9.17756	9.28731	8.84875	8.78312
ASHGA5P043835	0.0413089	1.76338	up	noncoding	ENST00000447336	RP11-645N11.3	GENCODE	333	chr7	+	102670550	102671801		AGTCGCTGCATATTGTTTAACTGCTTCTGACTGAAAAATATTCTTCCTCTCACCTTTTAA	intronic antisense	NM_001111038	FBXL13	F-box/LRR-repeat protein 13 isoform 2	-	102453307	102715288	215.916	122.606	7.24307	6.42472	71.9509	783.215	230.099	270.59	93.4146	61.3883	40.6628	176.007	118.488	155.315	119.325	268.975	77.225	80.7408	38.1755	7.41714	8.42585	6.46532	7.55054	6.36011	7.40739	7.32694	6.99125	6.99013
ASHGA5P021906	0.0413643	1.58293	up	noncoding	ENST00000544183	A2MP1	GENCODE	989	chr12	-	9406180	9420709		TCTACTATTTGATCAAAGCAAGAGGAAAAATCTCCCAATCAGGAATCCATGTGTTATCCA	intergenic							3384.99	2347.44	11.5691	10.9065	3818.7	5425.28	3947.91	3651.22	2498.24	2346.83	1752.85	3638.87	3063.67	2703.74	2988.49	3370.44	1069.25	1509.5	1726.96	11.8584	11.3111	10.9328	11.583	11.2736	12.0627	11.8886	11.6423	11.1939
ASHGA5P031530	0.0413671	1.95519	up	noncoding	ENST00000569218	RP11-895K13.2	GENCODE	488	chr16	+	10127540	10131154		AAATGAAAGGGCACGGCAGCCATGCAAAACTCTATCTCCCTAATGCTTTTCTTCCCATTG	intronic antisense	NM_000833	GRIN2A	glutamate [NMDA] receptor subunit epsilon-1 isoform 1 precursor	-	9847264	10276611	154.917	103.611	7.21155	6.24424	82.555	350.771	198.643	163.343	92.3979	107.904	94.0907	149.628	184.352	116.803	87.8347	162.203	55.0763	64.1356	54.8692	7.58773	7.25942	6.24269	6.78165	6.33907	8.22594	8.50484	6.75103	7.6421
ASHGA5P036401	0.0415103	1.56163	up	noncoding	TCONS_00026338	XLOC_012685	LincRNAs identified by Cabili et al	1505	chr18	+	53684983	53696360		CACCATGCCTCTCTTCTTGAATAATTTCCTGAAGTTCTAAGAAACATGAGTAGAATATAC	natural antisense	ENST00000382897	AC006305.1	HCG2045177; Uncharacterized protein; cDNA FLJ45743 fis, clone KIDNE2016464 [Source:UniProtKB/TrEMBL;Acc:Q6ZS83]	-	53670843	53858493	22.2457	18.0357	4.4231	3.78005	7.3236	48.9722	24.4488	29.5769	26.5776	14.2533	8.83801	17.9749	17.5871	15.8467	18.1465	37.4543	13.3088	15.9446	7.96181	4.55006	4.42226	3.37409	4.34429	4.59871	5.29941	4.95772	3.83829	4.11724
ASHGA5P045255	0.0415464	1.89786	up	noncoding	uc004aen.1	AQP7P1	UCSC_knowngene	771	chr9	-	67254266	67289492	NR_026558, uc004aem.1	TGGAACCACGATGCAGGCTCTAAACTCCTCTACAATCATCCTCCCTTGTGAGAAAAATAC	intergenic							231.11	124.833	7.41616	6.49179	147.641	717.453	281.55	300.296	52.5267	74.2425	54.2921	220.877	104.848	229.539	100.7	226.221	74.2818	69.3561	68.884	8.26529	8.30561	6.76591	7.71262	5.53951	7.67252	7.74711	7.32072	6.81901
ASHGA5P018199	0.0416832	1.67685	up	noncoding	ENST00000450550	AC073283.4	GENCODE	393	chr2	-	47550559	47572128		TGTGCCTGTGAGGGTCTGCACTCACCCTCCCAAGATTCAGAATCCACTGGCCTTGAGTTC	bidirectional	ENST00000405271	EPCAM	epithelial cell adhesion molecule [Source:HGNC Symbol;Acc:11529]	+	47572296	47614039	699.94	411.461	9.07119	8.32544	595.881	1999.34	972.553	839.962	230.778	237.702	169.813	553.491	402.871	802.872	357.682	462.106	300.451	314.743	239.501	9.81728	9.78846	8.69268	9.28883	7.68188	9.32055	9.29201	8.68781	8.70476
ASHGA5P048863	0.0416881	2.44386	up	noncoding	NR_038274	LOC100506874	RefSeq	2680	chr15	+	85113879	85123412	NR_038273, uc002bko.2	ATTCTTCTTTTTCCCTGAACATTTTTCATAATATGCTTTGTATCTCTTATTGTTAAAAAA	intergenic							22.2635	7.0756	4.00781	2.71866	5	20.3219	85.7416	9.3499	9.27251	25.6464	15.6273	7.14822	11.3136	5	6.99488	11.0315	5	5.18921	5	2.62964	3.32914	4.95274	2.98988	3.33068	6.14242	5.88341	2.80462	3.53721
ASHGA5P035023	0.0417308	2.17208	up	noncoding	TCONS_00004501	XLOC_002399	LincRNAs identified by Cabili et al	628	chr2	-	175197324	175198448		TTCTCGGCTTCCCATAGAGTCTCCGCGTAGATTTACTAATAGAGGGATTGTTAAGTGGCA	intergenic							19.1372	11.6643	4.38421	3.26513	13.2136	43.292	20.6585	15.2543	13.6707	20.4172	15.8352	10.7563	20.2944	6.60458	12.692	19.2404	6.47473	9.3872	6.95672	5.35755	4.24504	3.19046	3.53961	3.7609	5.81125	5.90368	3.26519	4.33065
ASHGA5P039815	0.0417342	1.59109	up	noncoding	uc001edc.1	BC047723	UCSC_knowngene	1208	chr1	+	113499036	113542118	ENST00000435800	GCTCCCTGGTAAGCAAGATTATGCTATAATCTTAAAATAGGCTCACACCTGTAATCCCAG	natural antisense	ENST00000429288	SLC16A1	solute carrier family 16, member 1 (monocarboxylic acid transporter 1) [Source:HGNC Symbol;Acc:10922]	-	113460381	113499635	156.118	116.774	7.1567	6.48668	33.6545	257.518	325.714	144.692	155.089	95.9417	86.9582	149.376	136.499	140.508	79.2536	180.046	132.144	68.2124	80.7535	6.53851	6.80927	6.98486	6.62165	7.10055	8.05217	8.39819	6.74841	7.19976
ASHGA5P053489	0.0418025	1.70096	up	noncoding	ENST00000523995	RP11-37B2.1	GENCODE	767	chr8	-	90733171	90734578		GTTCAGCATTCCTGCCCCATCTTAACATATTCTTTTTCTCGTCTTAACAGTGGTAATATT	intergenic							71.7308	54.301	6.12989	5.36353	59.5328	128.474	99.2368	76.7306	84.935	34.6013	32.3577	57.9781	41.648	49.8698	68.822	100.799	43.422	39.0236	36.5229	7.1859	5.78617	5.17134	5.6939	6.22131	6.57025	6.99498	5.41523	5.43105
ASHGA5P056855	0.0421728	1.65099	up	noncoding	TCONS_00009889	XLOC_004309	LincRNAs identified by Cabili et al	437	chr5	+	17483930	17485937		ATGCCCCCTCAGGGGTTAATTTTCAAGTTTTGGGTGATTTCCCCTCTTTGAGTTGCCATT	intergenic							93.5897	66.2418	6.40341	5.68008	86.9335	222.756	112.323	106.155	65.5336	36.2606	32.8823	85.8735	55.2165	75.6292	77.0547	106.581	56.7492	44.9169	47.5444	7.64528	6.59168	5.35722	6.16339	5.84071	6.64648	7.01626	5.96629	5.86396
ASHGA5P015703	0.0421953	1.9619	up	noncoding	ENST00000422764	RP11-384P7.6	GENCODE	399	chr9	-	33732972	33738414		ATGCAGCAAGGACTGTTAAAAATCTCCCAAGGCAGAGACTTTTAGGCCTACATGTACTTA	intergenic							974.657	640.993	9.83344	8.86119	1145.23	1701.5	1097.21	938.511	677.76	724.677	623.128	889.235	1099.65	664.826	752.16	1010.56	247.574	349.916	362.262	10.5458	9.54053	8.89199	9.45539	9.29392	10.6912	10.8257	9.42296	9.93215
ASHGA5P026800	0.0422061	1.50419	up	noncoding	ENST00000424313	AP000997.1	GENCODE	479	chr11	+	115498782	115500461		GCTTCCCTTGCTCCTGAACTTGAGCCTCTGATTCCCTCTCCTGTTGGAGGCTTTAACACG	intergenic							438.082	340.636	8.61698	8.028	307.709	742.359	904.625	484.592	418.009	205.763	143.215	298.38	394.713	337.783	322.551	656.654	298.13	192.494	182.127	9.05846	8.35328	8.57007	8.4114	8.57717	9.13601	9.0696	7.75988	8.66943
ASHGA5P057581	0.0422437	1.93405	up	noncoding	TCONS_00019371	XLOC_009195	LincRNAs identified by Cabili et al	347	chr11	+	69680125	69681839		TCCCTTTGGCTGCACCCAGGAGATGTGACTTCGAACTAAGTCTCCCCAGGCTCAATGTCC	intergenic							896.851	558.58	9.60676	8.65513	896.913	2340.12	933.485	930.141	526.806	489.08	375.144	683.121	767.839	631.743	695.177	1021.71	225.792	253.24	314.558	10.282	10.0633	8.62574	9.44441	8.89334	10.2279	10.2923	9.02516	9.49859
ASHGA5P045584	0.0424169	1.67757	up	noncoding	ENST00000422679	MIR1302-10	GENCODE	2923	chr9	+	27656	30891		TATATAAAAAGAGCATCATCAGTCCAAAGTCCAGCAGTTGTCCCTCCTGGAATCCGTTGG	natural antisense	NM_182905	WASH1	WAS protein family homolog 1	-	14510	29739	547.007	351.948	8.80971	8.06334	520.84	1570.48	479.494	579.31	417.093	179.95	156.232	472.655	257.952	491.805	366.371	687.193	217.39	189.791	253.131	9.65465	9.42296	7.56194	8.69555	8.57431	8.94714	9.18522	8.43592	8.11139
ASHGA5P035660	0.0427141	2.12396	up	noncoding	NR_027087	LOC284632	RefSeq	1863	chr1	+	24526729	24538180		AGAAAGAAGGATTTGCGTTCAGTTCAAGGAAGGCTTATAATTCTCCAGGGGTGTCCAGAC	intergenic							17.9952	11.7034	4.28354	3.19678	17.8818	40.1702	21.2261	13.363	13.3017	17.9729	10.6293	9.41629	18.7238	15.0384	10.3821	15.2643	5	12.5154	5	5.75793	4.14928	3.21975	3.39188	3.73437	5.62917	5.27127	3.11467	4.20988
ASHGA5P031329	0.0428471	1.69778	up	noncoding	TCONS_00006757	XLOC_003387	LincRNAs identified by Cabili et al	2081	chr3	-	194565037	194567506		TTCATGACCCCAGTATACCTCTCCCAAGAGGTGTAGTAAGTTCGTTTTACGTGGTTGATA	intergenic							15.2687	11.0665	3.92234	3.15869	6.23839	40.7924	20.1808	15.5105	7.54127	11.7768	7.0016	13.1075	15.1277	12.2336	12.2688	16.3703	7.67845	8.78687	5	4.32356	4.16785	3.16745	3.558	3.10766	5.02515	4.54548	3.48355	3.90561
ASHGA5P030653	0.0428759	1.67597	up	noncoding	uc010bki.1	BC150506	UCSC_knowngene	611	chr15	+	75288944	75289555		GAAATAATAGGACTAAGTAGTGACCTCCCTTGAGGATGCTCCTTGTTCTAGTTTAGAGCA	intron sense-overlapping	NM_001178111	SCAMP5	secretory carrier-associated membrane protein 5	+	75287875	75313836	44.7784	32.5211	5.39297	4.64798	24.3466	101.436	72.8048	43.2913	41.836	18.9273	21.9762	33.6088	42.888	26.1541	37.3557	48.3923	26.8434	23.2665	22.7477	6.13606	5.4409	4.69614	4.87782	5.2364	5.71105	6.39897	4.64642	5.47552
ASHGA5P026581	0.0429093	1.74482	up	noncoding	ENST00000562341	RP11-211G23.1	GENCODE	2424	chr11	+	69229074	69231600		TTCCAAATTAGGTGCTGAGCTGAGCTCATATTCCCAAAATGCACACTCCCCTCCTTTTTT	intergenic							3386.58	1866.08	11.383	10.5799	7101.44	6399.62	3304.76	2756.94	2977.65	1364.28	1650.37	1537.6	1676.46	2002.51	2455.1	3173.72	1257.45	910.573	1586.73	12.6237	11.5533	10.6642	11.1055	11.6074	11.4148	11.8328	10.2621	10.4564
ASHGA5P037489	0.0430299	2.38031	up	noncoding	ENST00000458654	AP001619.3	GENCODE	587	chr21	+	43290741	43292163		CATCGGGCCCTTTTATTTCCAAGTCTTTCTTTTTGTCTTCTCTAAAATAAAGCAAATAGC	intronic antisense	NM_001040424	PRDM15	PR domain zinc finger protein 15 isoform 2	-	43218384	43299582	21.087	12.7792	4.58885	3.3377	29.3083	23.2063	25.6441	14.6171	16.5837	18.8864	23.4369	17.0133	7.13149	24.5176	9.23454	21.3709	9.09641	5	13.1034	6.36077	3.47963	3.42297	3.48852	3.98682	5.70633	6.49587	3.76987	2.99964
ASHGA5P029373	0.0431492	1.94087	up	noncoding	ENST00000564585	RP11-982M15.8	GENCODE	3816	chr14	-	105127456	105131895		GACAGGAAAACGTAATGTTATAAACACATAATTCTCCCCAGAGAATTATGGGGACATAAT	intergenic							90.4468	59.3739	6.42951	5.47281	62.6957	199.014	102.657	93.9161	41.6068	70.502	43.0119	110.171	91.1298	74.4522	54.6855	85.6986	42.5759	39.4157	27.6593	7.25016	6.42163	5.22515	5.98143	5.22671	7.60996	7.40569	6.31535	6.62752
ASHGA5P056427	0.0432149	2.11688	up	noncoding	TCONS_00004172	XLOC_002012	LincRNAs identified by Cabili et al	951	chr2	-	21316934	21319427		GGGAGTTCTGGCCAAAATTGCAAATCCTTCAAATCTCCCAGAAGAGCAGAAGAAAAACAA	intergenic							212.309	140.294	7.70318	6.62124	162.472	410.737	278.816	226.334	135.214	130.811	140.866	213.22	252.698	170.106	159.186	204.809	49.859	83.4454	61.951	8.37484	7.49061	6.75103	7.2755	6.90633	8.51776	9.04606	7.26334	8.07738
ASHGA5P056051	0.0434074	1.63151	up	noncoding	ENST00000445805	RP4-594I10.2	GENCODE	420	chr1	-	24863137	24865371		GACTATATTCTTAAAGAATAAAAGTACTGCACTTCACCTCTATCTCCTGGTATCTCTTCA	natural antisense	NM_001251977	RCAN3	calcipressin-3 isoform 1	+	24829386	24863510	24.348	17.7049	4.47715	3.77094	13.9971	43.7226	47.4378	33.1266	12.1582	16.5978	6.13669	21.6073	14.8321	17.3787	19.5994	30.9461	17.8621	10.4295	12.8867	5.43548	4.25933	4.09583	4.49863	3.63554	5.51937	4.30648	4.06653	3.8764
ASHGA5P050507	0.0434143	1.75827	up	noncoding	ENST00000429599	PCBP1-AS1	GENCODE	717	chr2	-	70310638	70313405	ENST00000437019, ENST00000442040, ENST00000456161	GCGAATGACTGTAAAATGTGGGCACAATATTTAATCTCTCGCCTTTTTAAAGCTTAATAG	intergenic							12.2953	10.082	3.75424	2.94008	9.07281	29.215	12.2133	12.1457	5.84614	10.5191	6.04695	13.3034	8.99225	19.7377	5	11.3118	7.86748	12.6646	5	4.85026	3.74557	2.67953	3.28251	2.8444	4.85105	4.27911	3.50147	3.26846
ASHGA5P030367	0.0434365	1.60294	up	noncoding	ENST00000441272	RP11-66D17.3	GENCODE	4120	chr1	-	156657488	156661789		GAGCCACTGTCCTCTCCATTCTTTTTATTGTTATTTTGCCTTTTGAAAATATTTTTGCAT	intergenic							107.875	87.5763	6.74164	6.06093	58.4136	157.192	177.277	131.053	117.323	64.6398	56.2768	100.823	89.1584	96.3313	88.1036	149.923	88.9594	51.1125	49.4462	7.16535	6.08227	6.06139	6.46842	6.68883	7.47791	7.79624	6.19272	6.59451
ASHGA5P038659	0.043439	1.90334	up	noncoding	ENST00000424493	AC024560.2	GENCODE	1471	chr3	-	197387435	197392628		TCACCGTGAAATATCTTCTGAGACACAACAATCTCCCTGAATTAAAACTACAGACTCTAA	intergenic							495.787	327.904	8.80834	7.87981	287.544	1186.49	666.535	573.008	312.504	259.933	270.273	410.014	407.86	419.448	412.627	581.727	129.927	213.939	129.798	8.98327	9.01287	8.06517	8.67858	8.15579	9.442	9.90033	8.22873	8.71508
ASHGA5P057932	0.0434524	2.02745	up	noncoding	TCONS_00023917	XLOC_011215	LincRNAs identified by Cabili et al	242	chr15	+	39676211	39680961		GTAACCTGGAGACCTGCAGTCTCAATGTATCAGATCACAACTTAAAAATATCTCCCAAAG	intergenic							87.9397	60.7061	6.43752	5.41785	78.6499	144.808	102	102.728	63.5635	54.1561	37.2719	120.34	68.6264	97.1765	85.5953	82.4687	28.2703	25.6081	37.1976	7.53494	5.96338	5.21384	6.11642	5.79863	7.22552	7.20582	6.4416	6.18773
ASHGA5P036503	0.0434949	1.80544	up	noncoding	TCONS_00027180	XLOC_013220	LincRNAs identified by Cabili et al	288	chr19	-	10349735	10361691		CCGTGCCCTTTTGCAGTCAACCTCTCCTGTCCCAATATTTCACCGTCCCTATAGTTTTTT	intergenic							294.081	192.173	8.04379	7.19144	484.288	470.885	427.485	267.658	302.185	120.647	113.149	166.354	185.36	218.786	214.239	354.539	148.26	110.644	113.383	9.56805	7.68223	7.40333	7.53404	8.09776	8.39673	8.76427	6.90387	7.65178
ASHGA5P031105	0.0435679	1.9403	up	noncoding	TCONS_00006092	XLOC_002701	LincRNAs identified by Cabili et al	466	chr3	+	71835019	71835668		TTTATGCCCACATCTGTTCCCGACCCTCTCCTCTGATTTTCCTCACATGTATTTCCTCCC	intergenic							680.561	391.245	9.2186	8.26231	1309.6	896.253	973.641	674.712	657.855	348.658	299.736	284.03	313.08	350.535	498.69	623.985	334.253	187.526	430.649	10.6969	8.60327	8.69422	8.96171	9.23737	9.84225	10.0228	7.69016	8.36807
ASHGA5P044620	0.0436281	1.71554	up	noncoding	ENST00000572124	RP11-504P24.6	GENCODE	1886	chr1	+	224196428	224198314		TATCTTCTACCAAGGCCTTTCTCCTTTGTTGCTTCAAAATTTTTTATGAAAGGAACATCC	intergenic							24.8629	18.2884	4.56098	3.78231	11.1503	47.914	42.2348	28.8774	8.95649	16.2479	10.9321	32.5903	22.2033	26.4438	13.5067	25.2233	20.9777	8.8775	10.7867	5.1301	4.39022	3.95237	4.31066	3.29454	5.48205	5.32177	4.6061	4.46093
ASHGA5P038387	0.0436408	1.61976	up	noncoding	TCONS_00014873	XLOC_006941	LincRNAs identified by Cabili et al	889	chr8	+	141474980	141476603	TCONS_00014872	ACGTCACAAGTCTCATGCGTTTCTCCACCTACGTTTTGCACATGTGCACACATTTATTGA	intergenic							13.0824	9.9623	3.73195	3.03617	6.20243	30.363	11.5687	22.7079	11.0973	6.59504	5.85787	10.2672	14.5493	5.15202	9.22438	22.0741	5	8.36158	5.37472	4.31518	3.7943	2.6398	3.99179	3.53044	4.15382	4.22094	3.20932	3.85025
ASHGA5P030384	0.0437005	1.70041	up	noncoding	TCONS_00008688	XLOC_004203	LincRNAs identified by Cabili et al	924	chr4	-	185210995	185215360		TATATAACAAGAGTCTTTGAGAAGAGAGTCGTATGACCTAAGATGTCCCCTCCAACTACT	intergenic							268.758	163.223	7.74806	6.98217	423.552	613.682	272.012	263.516	241.876	58.6281	60.328	216.47	128.431	206.046	180.156	274.463	132.453	106.76	114.249	9.40168	8.07876	6.71062	7.51173	7.75825	7.3469	7.89036	7.28614	7.10528
ASHGA5P017679	0.0437256	2.06496	up	noncoding	ENST00000444503	OSBPL10-AS1	GENCODE	526	chr3	+	31758482	31763069		ATAATGTTATAATGTTCTCTCCAGGCCACGCAGAAGAATTTCCATTTCTTCTTCTTCTTT	intronic antisense	NM_001174060	OSBPL10	oxysterol-binding protein-related protein 10 isoform 2	-	31702316	32023342	10.8761	6.56352	3.76586	2.71974	5.01455	9.69508	9.47291	14.6867	9.56808	11.1834	17.1734	10.2144	7.49734	8.23095	5.01985	9.93219	5	5	5.26431	4.01785	2.55546	2.51294	3.49459	3.36647	4.93995	6.03528	3.20431	3.05614
ASHGA5P053237	0.0437836	1.7654	up	noncoding	uc003uyp.4	BC039094	UCSC_knowngene	1484	chr7	-	101208586	101212286		GGCATTAGAATTTATTAATAACATTGGGAATAAATCTCCCTGGAATTCAATTAACTGAAA	intergenic							1107.23	763.416	9.99776	9.17776	1106.38	2052.02	1253.47	1302.22	766.074	663.469	532.694	1181.48	945.685	885.964	1025.72	1270.12	338.234	463.443	414.74	10.5134	9.82551	9.09419	9.95174	9.48157	10.5885	10.6757	9.85151	9.76055
ASHGA5P044050	0.0438116	1.9086	up	noncoding	ENST00000447563	AC004863.6	GENCODE	3824	chr7	+	158801044	158815371		TGGAACTGCAAACTCTGTATTATCTCCCCTTTTGTGAAATTCTATGGAAAATTCGAGCAA	intergenic							4837.75	2683.58	11.8975	10.9649	3943.26	12173.9	5876.75	6048.99	1824.62	1733.33	1342.15	5759	3240.7	3818.94	3370.05	4993.98	976.172	1305.98	1079.21	11.9173	12.6736	11.5862	12.4641	10.8167	11.7105	11.6445	12.3668	11.2695
ASHGA5P016400	0.043841	1.6994	up	noncoding	ENST00000430098	RP5-1028L10.1	GENCODE	482	chr1	-	110708807	110709805		CTGTCAGCTCCTTCTCATTCAGGGACCTAGGAAACCAGGATCCCCAGGTGATTTAAAAAA	natural antisense	NM_001010898	SLC6A17	sodium-dependent neutral amino acid transporter SLC6A17	+	110693131	110744823	13.994	10.1726	3.90377	3.13874	6.10489	27.7563	22.2378	17.8473	8.18481	10.5436	9.24207	10.0351	11.8053	7.13457	11.8046	19.649	6.40457	6.67268	7.73737	4.29573	3.68639	3.26654	3.71346	3.19474	4.85368	5.03236	3.18723	3.59089
ASHGA5P026642	0.0438755	1.57102	up	noncoding	ENST00000529215	CTD-2562J17.7	GENCODE	506	chr11	+	74971170	74972069		TGTGTAAAGATGAATTTAACCCTAGCCTCTCTCCTATCACACTGCTTCTCCTGCTGTGTC	natural antisense	NM_004041	ARRB1	beta-arrestin-1 isoform A	-	74971165	75062875	252.987	186.281	7.7833	7.13159	254.037	458.797	389.423	304.32	283.392	78.0228	59.3729	196.528	93.1698	175.503	218.055	371.202	144.888	128.299	172.854	8.86037	7.64451	7.25991	7.73439	7.99242	7.75335	7.87102	7.15039	6.65706
ASHGA5P040648	0.0440765	1.719	up	noncoding	ENST00000502275	RP11-395P13.3	GENCODE	760	chr5	-	124705857	124706617		ATGTTTCACTCTTTGCTGGAGTTTACTTTAAAAGCCTCCCTTTCCCTTCAACATTATCAA	intergenic							877.419	560.104	9.53124	8.74968	1561.58	1687.82	1034.4	810.871	610.534	275.872	311.769	726.502	435.107	851.912	674.967	928.226	339.919	267.039	423.556	10.8625	9.53328	8.79981	9.24399	9.11407	9.52159	10.0568	9.11787	8.79198
ASHGA5P032440	0.0441515	1.79691	up	noncoding	TCONS_00029702	XLOC_014378	LincRNAs identified by Cabili et al	1555	chr22	-	39608718	39610817		TAGGCTTCTTGACACAGAGTAGTCAAGCCACTCCCTTGCTCATAACCTTCTATGACTTCT	intergenic							37.0706	27.7665	5.2244	4.37888	19.5263	65.1804	63.4496	41.99	33.3463	22.9352	27.2566	22.8804	31.5066	20.6346	25.2902	53.8723	24.9249	19.6077	18.5292	5.86803	4.82805	4.49531	4.83298	4.91719	5.98544	6.72949	4.13874	4.99348
ASHGA5P037719	0.0443059	1.54414	up	noncoding	ENST00000424613	CTA-250D10.19	GENCODE	515	chr22	-	42377307	42378221		TTTAAAGCACTACAAAAGAGTAGAAATAAGACCACCCTTCATCCAATCCTTCCACCAGCT	natural antisense	NM_019106	SEPT3	neuronal-specific septin-3 isoform B	+	42372930	42394225	32.2375	24.2324	4.87048	4.24368	24.5343	56.0612	60.079	38.0091	37.1889	10.8556	9.43156	21.7402	14.6382	24.3634	28.3521	35.9763	21.2131	24.4867	20.5973	6.14401	4.60875	4.41807	4.69054	5.06757	4.89501	5.06637	4.07354	3.85889
ASHGA5P045324	0.0443135	1.76823	up	noncoding	TCONS_00001928	XLOC_000036	LincRNAs identified by Cabili et al	426	chr1	+	5058061	5063844	TCONS_00001929	CTTCCTACTAGAAAAAGACAGCATCTCCTCATCCTGCATTCACTACATGGTGGAACAATG	intergenic							112.289	81.3942	6.74743	5.92512	91.3584	223.56	158.213	137.015	89.8742	64.4894	44.842	88.9618	88.3868	64.9177	83.3774	169.799	45.9554	50.9481	66.3752	7.70665	6.59949	5.88667	6.53681	6.29992	7.47438	7.4577	6.0178	6.58061
ASHGA5P023200	0.0443601	2.21782	up	noncoding	NR_027697	FLJ39653	RefSeq	2496	chr4	+	16228285	16259810		GGTCCTGCAGTCAAAACTTCTTTGAGACGATGCTGTCGGCCTTGGCCAATCGGAGAATCG	bidirectional	NM_153365	TAPT1	transmembrane anterior posterior transformation protein 1 homolog	-	16162127	16228161	16.8206	9.96116	4.29363	3.14449	16.0191	25.4728	19.0451	9.20177	10.5327	18.1014	17.7032	18.4888	12.5753	12.6415	10.1039	16.5383	5.05671	5.40979	7.40254	5.61493	3.58401	3.11007	2.97099	3.47431	5.6397	6.08302	3.87201	3.66841
ASHGA5P030554	0.0443915	1.57515	up	noncoding	ENST00000559915	RP11-209E8.1	GENCODE	601	chr15	+	53408561	53421895		GAATTCAAGGGCCAAATGCTTTTTCGGCGTCTCCTTTTCTATCCTTCCCTTTCATGTGAC	intergenic							88.7163	63.6844	6.24911	5.59362	60.7096	227.806	145.246	101.347	63.005	32.3451	28.9835	50.289	43.5649	52.3305	63.7696	129.612	58.0875	52.3193	46.1063	7.20912	6.62822	5.74874	6.09452	5.78472	6.47966	6.83332	5.21457	5.50052
ASHGA5P017435	0.044426	1.50725	up	noncoding	ENST00000441570	LINC00472	GENCODE	475	chr6	-	72126179	72129970		TTTTACAAAAGAACATTAAAATCTCCCCAGATGCTCACTGCTCTGATCATTTCCCCTACA	intergenic							10347.9	6981.34	13.1379	12.546	10108	19503.6	12367.7	12438.4	7309.44	7035.87	3328.82	10691.4	9161.82	8298.93	7825.5	11746.5	3738.96	4063.38	4034.35	13.0496	13.5001	12.8179	13.6621	12.9373	13.1575	12.4951	13.4838	12.3816
ASHGA5P043152	0.0445433	1.77706	up	noncoding	ENST00000275590	AC006014.8	GENCODE	980	chr7	-	75021228	75024708	NR_003602	ACAGTTTCTCCTGCGTAACCTTCTGCCTACCTTCCTGAGAGTGGTTGGTGACAGCAGCCG	natural antisense	ENST00000450434	TRIM73	tripartite motif containing 73 [Source:HGNC Symbol;Acc:18162]	+	75024336	75034896	108.487	72.6845	6.63479	5.8053	118.66	211.621	154.649	137.053	100.828	36.8567	48.2625	59.9645	68.8903	51.7028	89.023	126.769	70.8608	52.7639	48.7817	8.0032	6.51444	5.84965	6.53709	6.46125	6.66954	7.58579	5.45739	6.19298
ASHGA5P015916	0.0445516	1.70784	up	noncoding	ENST00000424769	MFI2-AS1	GENCODE	356	chr3	+	196726330	196731607	ENST00000415244	CAGGATCTAGATATCTCCCCACAAACCTAAACAATTTCGAGAGGGACTTGTGTTCTGCAA	intronic antisense	NM_005929	MFI2	melanotransferrin isoform 1 precursor	-	196728611	196756687	4363.12	2697.08	11.8042	11.032	3366.18	11591.4	4586.97	5040.24	2089.93	2153.01	1695.57	4381.62	3620.6	3213.95	2834.72	5155.59	1078.63	1632.74	1343.3	11.728	12.5868	11.2057	12.15	11.0217	11.9679	11.8504	11.9231	11.3865
ASHGA5P037410	0.0447141	2.1593	up	noncoding	ENST00000434859	AP000477.3	GENCODE	847	chr21	+	25415571	25422601		ATCATAAAGCTGGTCTATCATGCCCAGTGCTTGGACAGAAGAAGAAGAGAGCAATGGAGA	intergenic							38.2754	20.7942	5.14684	4.03627	61.2663	42.1778	88.9658	15.4252	32.9839	17.1253	21.9727	26.2858	33.5042	21.1352	17.1736	24.8823	17.7549	15.6213	15.4878	7.22299	4.21205	5.0105	3.55187	4.90044	5.56052	6.39701	4.31933	5.0897
ASHGA5P057976	0.0448237	1.6505	up	noncoding	TCONS_00024510	XLOC_011826	LincRNAs identified by Cabili et al	947	chr16	+	88219180	88220350	TCONS_00024508, TCONS_00024509, TCONS_00024904, TCONS_00024905	TCGCACACACGCATACACGTGCCCAGACCTACAGACACACTCACATTTGCACAGTCACAC	intergenic							21.6454	15.0464	4.29852	3.57562	7.22018	73.6309	20.1738	14.5241	13.2887	13.5469	10.7292	20.0495	15.5469	18.822	8.59506	25.8753	11.9435	16.1215	8.42076	4.5296	4.99464	3.16703	3.4822	3.73291	5.22021	5.29022	3.9714	3.94678
ASHGA5P036244	0.0448631	1.74746	up	noncoding	TCONS_00026873	XLOC_012931	LincRNAs identified by Cabili et al	1367	chr19	+	6656384	6662832		GCAGCAATGCTCATTTGCATAGACCCTCTAATTTGTATGCATATCATTATCTGCCCCCAC	intergenic							36.4997	26.0235	5.04452	4.23926	26.5624	81.0218	41.1805	53.6905	20.5783	15.9876	10.0931	42.8837	28.3981	34.3883	24.6372	51.2997	11.4807	15.4093	16.5508	6.23525	5.12665	3.9262	5.17865	4.26565	5.46044	5.18166	4.98168	4.84361
ASHGA5P030134	0.044888	1.89819	up	noncoding	TCONS_00008781	XLOC_003528	LincRNAs identified by Cabili et al	1851	chr4	+	44018907	44023446	ENST00000512678	TTAATTTTCAAGCATCAACTAATGTTTCTACTCTCCCTGAGTACCATAAAAAGCCTTCTG	intergenic							62.07	41.8205	5.86	4.93538	35.4502	148.391	80.3156	65.1064	29.0172	36.8551	29.5108	71.9135	65.733	66.8098	35.9031	49.8566	24.226	23.133	27.0817	6.60101	5.99714	4.85671	5.45664	4.7205	6.66918	6.86151	5.71731	6.13054
ASHGA5P019732	0.0449181	1.73399	up	noncoding	uc009yix.3	BDNF-AS1	UCSC_knowngene	1182	chr11	+	27528398	27719718	NR_033313, uc009yir.3, uc009yis.3, uc009yiu.3, uc009yiw.3, uc009yiy.3, uc009yiz.3, uc009yja.3, uc009yjb.3	TGTTTTACAGGATTTTCCCTCCTGGTGAGTCAAAATGAACAAGAAATACCCCAGGACCTC	natural antisense	NM_001143805	BDNF	brain-derived neurotrophic factor isoform a preproprotein	-	27676441	27742326	353.094	194.852	7.90925	7.11515	187.909	1234.13	399.413	404.478	155.865	78.5213	45.3409	319.092	172.267	301.883	181.046	402.746	109.187	121.733	75.0989	8.54661	9.0892	7.29598	8.14708	7.10724	7.76154	7.47438	7.85198	7.53866
ASHGA5P031735	0.0449689	1.81823	up	noncoding	ENST00000428569	RP11-541F9.1	GENCODE	583	chr1	-	191827892	191859359		GATGTTCTTTTTCTTTCCCCCGGCCAGGGATCTGAAACTAACTCGGACTTACTTGAAAAG	intergenic							15.5521	10.3372	4.03739	3.17486	6.07507	39.4449	15.2205	14.735	10.2161	16.8105	9.96757	11.9474	9.51336	11.5192	11.1584	17.4471	5.82588	7.99799	8.89865	4.28724	4.12428	2.87302	3.49871	3.43987	5.53622	5.15927	3.38053	3.33254
ASHGA5P000520	0.0450846	1.81382	up	noncoding	chr8:140577700-140593825+	chr8:140577700-140593825	LincRNAs identified by Khalil et al	16125	chr8	+	140508518	140524643		TAGCAGTTGTAAGAATAACCTGGTTAGTGGATCTGAGTGGACTCCCCAAGTGTTAGATGC	intergenic							25.992	17.3751	4.67008	3.81105	14.9053	71.0018	28.1571	26.9554	13.8151	17.8037	14.2183	21.0795	19.9929	15.9728	22.3985	24.8478	12.3294	15.5904	10.4941	5.52242	4.9388	3.5164	4.21879	3.77306	5.61379	5.74211	4.03528	4.30792
ASHGA5P030282	0.045129	1.8409	up	noncoding	ENST00000554649	RP11-255M2.1	GENCODE	715	chr15	-	95577612	95578966		AAACATGCGTGTGTGTACATGAAGCACAACCAGCATTTGGAATATCCTCCCTCAGGCAAA	intergenic							131.325	83.2101	6.75066	5.87026	79.9778	399.021	125.048	171.217	83.2434	42.0483	38.311	111.734	85.346	86.4541	94.3157	187.7	35.2944	58.8745	34.486	7.55335	7.44507	5.52443	6.85289	6.18831	6.85959	7.24553	6.33615	6.53076
ASHGA5P019663	0.0451385	1.81748	up	noncoding	ENST00000499137	RP11-887P2.1	GENCODE	3325	chr12	-	93936238	93965544		GACCCTGGAGGATTTGATGGAAATGCTACAAGAGAAGCAGGCTCTCCCCTTCTGAAATGA	intronic antisense	NM_001270467	SOCS2	suppressor of cytokine signaling 2	+	93964174	93970521	607.503	349.513	8.96642	8.10448	1235.45	1253.19	594.206	532.34	415.061	211.958	214.991	402.836	302.686	402.036	442.511	580.773	250.836	208.758	258.987	10.6291	9.12061	7.88903	8.5503	8.56743	9.17885	9.58884	8.20712	8.32328
ASHGA5P042839	0.0451688	1.61844	up	noncoding	TCONS_00020154	XLOC_009604	LincRNAs identified by Cabili et al	252	chr11	-	130270904	130271852		AAGGACAGTCTGTCTTATGGGGAAAACTCTCCTCCCCACGTTTTTCTGGGGGCCTCCGCT	natural antisense	ENST00000318117	RP11-121M22.1	Uncharacterized protein [Source:UniProtKB/TrEMBL;Acc:E9PPS3]	+	130184418	130273133	2855.05	1766.71	11.1762	10.4816	5176.67	6131.76	2861	2333.71	1905.58	1226.63	1477.43	1727.58	2258.27	2136.1	1894.11	2814.48	1222.9	898.451	1142.66	12.2453	11.4876	10.4367	10.8588	10.8803	11.2974	11.7472	10.4564	10.8229
ASHGA5P047929	0.0452978	2.14546	up	noncoding	uc001mjn.1	AK056982	UCSC_knowngene	1112	chr11	-	10905705	10920824		TTCACTTTGGTGACCCTTTAGGCTTCCCTTTTTAGACCACAGCTGTCACATGTTTCTGAC	intergenic							29.4614	19.4788	4.97817	3.87688	12.0541	50.0249	29.7198	27.0939	26.118	27.3548	33.4612	29.8648	18.521	29.1194	24.3408	27.5653	15.2389	9.45072	12.1153	5.23286	4.45032	3.57611	4.22342	4.57599	6.23272	7.04366	4.49025	4.19376
ASHGA5P029808	0.0454181	1.82184	up	noncoding	TCONS_00008153	XLOC_003601	LincRNAs identified by Cabili et al	264	chr4	+	88192261	88199855		GCAGAATCATTATGGAAGCTACTGAGTGACAAGGCATCCCTGCATTGGTCCTTTATATGA	intergenic							11.7936	7.74801	3.77063	2.90524	10.1659	15.6375	21.3377	6.40907	14.2464	6.14656	10.4294	9.97606	5.40954	10.7079	6.98913	5	9.44119	7.15833	9.52995	5.00433	3.01021	3.22468	2.6422	3.81077	4.05207	5.24102	3.17979	2.71308
ASHGA5P027999	0.0454412	1.78444	up	noncoding	ENST00000562343	RP11-923I11.6	GENCODE	2298	chr12	+	52211682	52216211		CATTTCTGGGATCTCCCCTCAAAAACAAACAAAAAATTCCCCTTCTTTGGGGACTTTTTT	natural antisense	NM_001013690	FIGNL2	putative fidgetin-like protein 2	-	52211675	52225701	2070.48	1306.54	10.7608	9.92531	1409.22	4298.53	2840.87	2240.29	697.439	1363.31	841.619	2872.57	2107.73	2256.7	1063.97	1760.71	590.539	654.182	711.972	10.7685	10.942	10.4168	10.7999	9.3404	11.4104	11.1312	11.277	10.716
ASHGA5P023612	0.0454899	1.70818	up	noncoding	HMlincRNA1065+	HMlincRNA1065	LincRNAs identified by Khalil et al	11540	chr1	+	87222750	87234290		AACCATATGTGACTTGTGTGCTTCCCCTTTCCAGCTCAGTAATACAAAGAAGAAGCGTTC	intergenic							174.056	121.794	7.29718	6.52472	229.888	291.277	291.62	164.986	135.091	56.6505	63.4686	159.469	84.4296	179.835	141.239	196.426	77.3921	68.4066	104.831	8.75204	6.99535	6.82033	6.79725	6.90561	7.29894	7.96611	6.84183	6.51061
ASHGA5P035419	0.0454901	1.95737	up	noncoding	ENST00000455988	AC007405.8	GENCODE	547	chr2	-	171672914	171674547		AAAGGCCCATATCTTTACGTTCTCCCTCGGACTTGGCCAGAGAAGAACCACAGTCACCTT	natural antisense	NM_000817	GAD1	glutamate decarboxylase 1 isoform GAD67	+	171673199	171717659	188.248	113.441	7.24756	6.27865	92.3935	590.512	206.26	219.769	76.6863	87.5367	52.9226	179.902	171.535	151.615	97.609	222.392	42.441	64.8556	43.6426	7.72078	8.02261	6.29665	7.2259	6.06753	7.91165	7.71025	7.02514	7.53317
ASHGA5P044849	0.0455583	1.62082	up	noncoding	ENST00000519990	RP11-705O24.1	GENCODE	1173	chr8	+	62791440	62798121		CACTTCTTAACTTTTTCTCTTTCTTGCTATTGAGGAGCACAATCTAAAATTTGTAGGCAG	intergenic							13.524	9.4271	3.58892	2.8922	5	23.1848	15.7338	14.4469	16.0593	5.59581	5.98056	22.1905	5	19.348	9.31801	17.24	5.08374	5	5	2.62964	3.47844	2.90529	3.47577	3.94839	3.91616	4.25767	4.10001	2.35685
ASHGA5P050165	0.0456181	1.89842	up	noncoding	TCONS_00019067	XLOC_009007	LincRNAs identified by Cabili et al	358	chr10	-	134824705	134825301		ACACACTAACACACATCACACGTGCTAAAACACGTCACACAAGCACACATCACACACACT	intergenic							17.4655	10.2069	4.01956	3.09477	7.10953	66.0035	13.0585	10.1075	10.1304	9.04023	13.4915	10.7832	6.75309	20.2849	7.33593	13.6488	9.92009	7.15603	6.34959	4.50928	4.84283	2.73469	3.0753	3.42968	4.63266	5.66452	3.26753	2.93534
ASHGA5P030165	0.0456398	1.88573	up	noncoding	TCONS_00008592	XLOC_004099	LincRNAs identified by Cabili et al	543	chr4	-	140522356	140527570		TGGAATGATGAGTTGACTTGCACCCACTGAAACGGGGGCAAATCTCCTTCAAAAGATCAT	intergenic							21.9049	15.8965	4.49893	3.58381	20.2601	49.9381	20.6422	22.8164	13.1579	12.311	11.6203	24.4927	22.9465	19.9198	12.5081	28.7884	6.5169	14.8511	5.74462	5.91333	4.4483	3.18982	3.99603	3.71956	5.08599	5.41219	4.22625	4.51183
ASHGA5P037138	0.0459052	1.74402	up	noncoding	ENST00000530479	RP11-261P9.4	GENCODE	577	chr20	+	57285850	57286689		TCATGCTGTCATTTATTCGTTGTTCCTAAACACCCACTTCTCCCTGGAATGACCACAGGA	intron sense-overlapping	NM_001204872	NPEPL1	probable aminopeptidase NPEPL1 isoform 2	+	57264186	57290900	121.616	88.0377	6.83743	6.03501	96.4418	239.079	186.26	141.599	79.0866	75.0083	41.2788	114.174	100.107	101.557	103.85	146.027	66.43	36.8818	61.411	7.76472	6.69137	6.13502	6.592	6.11565	7.68258	7.35107	6.367	6.75658
ASHGA5P042058	0.0460184	1.59126	up	noncoding	TCONS_00021009	XLOC_010271	LincRNAs identified by Cabili et al	442	chr12	-	132302148	132303828		GAGAGAAAACAAAGAAAGCTTCAGTCGCTCCTTCCTAAGCTGTCACGACTACTCTTTTAA	intergenic							84.1326	65.7695	6.29779	5.62761	85.2957	132.769	98.1737	103.416	100.493	27.905	28.282	96.7259	33.1044	92.4089	55.8544	111.01	58.5826	64.0216	45.4042	7.62493	5.83121	5.15175	6.12538	6.45693	6.26161	6.79994	6.13054	5.06773
ASHGA5P032005	0.046056	1.94825	up	noncoding	TCONS_00029835	XLOC_014267	LincRNAs identified by Cabili et al	246	chr22	+	46043023	46045536		TATGAATAAAATAGCATTCGCGGCAGAGTGATCTCCTTGGATCTCCTGAGTGGCCCATTT	intergenic							16.355	11.1342	4.17323	3.21105	7.80151	28.2168	22.9027	16.7024	9.50239	16.9701	11.6232	17.1208	24.828	6.56751	10.2821	16.1467	9.19852	5	5.91666	4.64184	3.70524	3.30147	3.6399	3.35689	5.54973	5.41376	3.77701	4.6317
ASHGA5P032446	0.0461428	1.53447	up	noncoding	ENST00000441672	RP1-28O10.1	GENCODE	449	chr1	-	209834710	209897470		GACTCATCCCTTCTCTTCTGGAGCCATTTCCAATTCTGCCCAAAAGGACAGCCTGAAGTG	intronic antisense	NM_001206741	HSD11B1	corticosteroid 11-beta-dehydrogenase isozyme 1	+	209859524	209908295	60.3377	48.4949	5.82867	5.21092	19.7206	110.425	100.93	70.9531	68.5515	37.046	25.479	49.5959	55.4008	40.7508	43.9602	91.5594	37.9614	41.5535	28.2779	5.87883	5.56153	5.19636	5.58378	5.90806	6.67555	6.63183	5.19339	5.87004
ASHGA5P056199	0.0461616	1.67068	up	noncoding	TCONS_00000959	XLOC_000218	LincRNAs identified by Cabili et al	297	chr1	+	59180599	59181440		TTCATCCATCCTGCAGCTTCTACATTGTTCTTCATCTCTGGGAAATCAGTGACCCATGGA	intergenic							16.4905	13.2913	4.20188	3.46145	8.90958	24.54	19.7155	19.1171	15.6304	9.57022	13.2282	21.2127	15.0472	16.9378	8.04755	12.7898	16.227	11.1825	12.8073	4.82356	3.54404	3.14411	3.78929	3.91731	4.71593	5.63661	4.04422	3.89663
ASHGA5P033855	0.0461669	1.79052	up	noncoding	ENST00000582689	RP11-267C16.1	GENCODE	539	chr18	+	48872618	49058541		AGAGACAGACATTGTGTGATACTGAAAATCTCCTTCAACTCTTACCCTTCTCCTCAACTC	intergenic							107.483	77.0066	6.71423	5.87385	78.0053	226.243	147.161	114.421	87.0868	70.2441	57.5434	79.1585	102.813	69.4362	72.9622	136.578	56.3559	49.0493	51.8515	7.52658	6.61739	5.7669	6.26357	6.25708	7.60347	7.82496	5.85386	6.79429
ASHGA5P028981	0.0462164	1.53132	up	noncoding	ENST00000548875	CTD-2314B22.3	GENCODE	412	chr14	-	19892137	19921455	ENST00000548271	AAGGATTGCTCAAGGTGTCCTGGGAAAGATTTTGATTTCAAAGAGACAATCTCCCCCAGG	intergenic							6600.54	4156.88	12.4118	11.797	5804.3	16890.8	6973.18	8025.47	4143.47	3165.09	1887.76	5914.27	4345.41	4402.24	4748.86	7814.9	2340.16	2980.48	2466.12	12.3699	13.2009	11.8601	12.9587	12.1217	12.3927	11.9679	12.4223	11.6038
ASHGA5P023336	0.0463435	1.53341	up	noncoding	uc010xbm.2	CHST9-AS1	UCSC_knowngene	2172	chr18	+	24445271	24770658		TTATCCTCTACGTCTTTTCTCAGTGACACCTTCCTCTCATACGAGTAAAACTAGAAAAAA	intronic antisense	NM_001256316	CHST9	carbohydrate sulfotransferase 9 isoform 2	-	24495594	24765302	34.9153	26.5054	4.96862	4.35187	14.7748	75.376	44.9361	42.5412	52.9563	12.0722	12.1999	24.4661	25.7314	21.4517	27.8771	44.4562	26.3418	18.6365	21.0433	5.50864	5.02587	4.03288	4.85368	5.55215	5.05849	5.49293	4.22432	4.68529
ASHGA5P057578	0.046415	1.73841	up	noncoding	TCONS_00019359	XLOC_009185	LincRNAs identified by Cabili et al	275	chr11	+	68039633	68052051		TTTTGAGCAGTCCTTCTGACCCTCGTGGCTTCTCCTGCTCCAAGGCCAAGCTCGGGACCC	intergenic							346.046	209.743	8.14356	7.34579	563.566	479.075	699.617	232.849	418.013	110.41	86.0106	178.827	147.594	217.967	249.137	355.043	221.365	117.983	159.111	9.745	7.70177	8.14574	7.3193	8.57769	8.26529	8.37967	7.01398	7.30902
ASHGA5P047520	0.0465722	1.72938	up	noncoding	ENST00000428936	RP11-180I22.2	GENCODE	427	chr10	+	78907409	78909858		AACCTGAACTCAAAGAAGAGAACTGGAATAATCCTCCCTTATCCCACTTCCCATGGTGAG	intronic antisense	NM_001014797	KCNMA1	calcium-activated potassium channel subunit alpha-1 isoform a	-	78629358	79397577	212.176	150.663	7.64942	6.85916	198.33	467.283	225.178	244.932	186.059	122.04	87.7199	165.869	131.621	148.024	172.59	281.741	109.494	96.5266	114.641	8.60569	7.67176	6.42799	7.39915	7.36323	8.41637	8.41079	6.90036	7.14572
ASHGA5P027040	0.0466718	1.54294	up	noncoding	ENST00000545706	RP11-259O18.4	GENCODE	496	chr12	-	9139770	9149162		AATTTAGGAACTATATGTTCTCCCCCACTGCTTTAGAGTAACCTCTGGATTTTTCCCAAG	intronic antisense	NM_005810	KLRG1	killer cell lectin-like receptor subfamily G member 1	+	9142220	9163340	2202.56	1484.43	10.8732	10.2475	1677.94	4369.52	3184.36	2347.26	838.763	1440.15	869.131	2893.32	1921.36	2276.77	1409	1815.33	1054.05	844.537	1069.96	10.9518	10.9744	10.612	10.8702	9.62872	11.4799	11.1815	11.2869	10.6015
ASHGA5P029825	0.0467218	1.53929	up	noncoding	ENST00000557223	RP11-982M15.2	GENCODE	663	chr14	+	105235685	105236608		ACAAACTGGATGAAATAAATTAAAACCCGCAGGATAGTTTTCTTCCCTACCCCGCTGCGG	natural antisense	NM_001014431	AKT1	RAC-alpha serine/threonine-protein kinase	-	105235686	105262080	321.613	199.581	7.82932	7.20705	186.933	997.847	429.808	412.24	196.08	63.5007	41.2681	245.23	149.596	186.945	177.137	466.089	162.924	149.271	105.103	8.54302	8.78448	7.4127	8.18234	7.43905	7.45463	7.35024	7.46809	7.3287
ASHGA5P058050	0.0467419	2.11504	up	noncoding	TCONS_00025741	XLOC_012558	LincRNAs identified by Cabili et al	1147	chr17	-	66793604	66796516		ATGCAGGAGTCCTGGGTTCAAATCTCCATTCCAGCTCTATCCAGTACCCAAAATTGTCAT	intergenic							80.1631	49.6131	6.32265	5.24196	48.108	157.573	114.148	69.9703	45.7209	77.948	70.45	57.3857	72.2229	54.911	41.2344	75.2219	26.9229	35.5498	41.2291	6.93736	6.08812	5.38221	5.55871	5.34955	7.75083	8.11389	5.40051	6.26586
ASHGA5P046426	0.0467551	1.84059	up	noncoding	ENST00000452911	RP11-435M3.2	GENCODE	481	chr10	-	26213376	26222639		CAGCCAAAATTAAGACTGATGGAGAAATTTCCCCCAGCAATACCACTTAAAAATATGTAT	bidirectional	NM_017433	MYO3A	myosin-IIIa	+	26223001	26501465	63.7161	42.0692	5.91755	5.03739	60.732	147.357	78.5074	70.0989	34.6284	35.6214	30.9217	51.8615	42.4506	45.6155	45.1632	64.9915	23.8316	40.8812	31.5507	7.21011	5.98544	4.82007	5.56102	4.96832	6.61102	6.9289	5.25553	5.46313
ASHGA5P040072	0.046836	2.19677	up	noncoding	ENST00000503557	RP11-26P13.2	GENCODE	441	chr4	+	114864411	114865476		TCCTGGGATTGACCTCTCCTTTCTTTTAAAAAATATTCAGTGAACACTACTTTGTGCCAG	intronic antisense	NM_024590	ARSJ	arylsulfatase J precursor	-	114821439	114900878	28.4326	19.2257	4.90658	3.7712	14.5154	51.248	36.5689	33.1692	25.2966	22.947	27.3807	16.3346	35.0034	10.0599	18.1269	39.8957	13.8249	8.25517	9.41374	5.48803	4.48409	3.7943	4.50061	4.53274	5.98658	6.73842	3.72791	5.1549
ASHGA5P056454	0.0469137	1.73312	up	noncoding	TCONS_00004370	XLOC_002253	LincRNAs identified by Cabili et al	238	chr2	-	108263407	108267421		TATATTGTTGAGAAGTGGAATCCCCTTTGGTAGCTCTGTACCTTCAGCTTCTCCCTCTGT	intergenic							98.4906	65.0289	6.3273	5.53393	72.8219	280.839	117.092	137.33	63.72	30.0838	25.4857	60.5521	54.1078	80.4859	72.7868	138.163	38.9661	45.2922	25.4009	7.43354	6.94117	5.42091	6.54076	5.80144	6.37724	6.63246	5.4709	5.83573
ASHGA5P027269	0.0469305	1.72743	up	noncoding	ENST00000552768	RP11-70F11.11	GENCODE	282	chr12	-	50302664	50305646	ENST00000546911, ENST00000551922, NR_026948	CCCTCCCACATGTTCACAGACAAAATCTTCTTCCTTATTTAATAAAACAATATAATGACC	intergenic							3113.9	1911.66	11.3107	10.5221	2872.52	7906.52	2128.86	4029.48	1806.02	1406.15	1136.76	3624.89	2674.01	2892.21	1740.23	3211.05	1021.52	907.889	934.693	11.5492	11.8886	9.92682	11.7492	10.7999	11.4526	11.4785	11.6407	11.0381
ASHGA5P023838	0.0471211	1.56337	up	noncoding	HMlincRNA629+	HMlincRNA629	LincRNAs identified by Khalil et al	11381	chr3	+	193577911	193589292		TATGTGACAGGGACCATTCCCTACCTCTGGTGTTTTCTAATTCCTTAACAGAAGCTAATC	intergenic							16.4595	6.86397	3.37324	2.72858	5	15.742	66.6271	12.1677	8.19269	7.41229	5	11.5342	5	6.96342	6.63584	10.7678	8.29704	5	5.38367	2.62964	3.01844	4.57069	3.28593	3.19631	4.32571	2.61568	3.34353	2.35685
ASHGA5P027923	0.0471596	1.71044	up	noncoding	TCONS_00012055	XLOC_005587	LincRNAs identified by Cabili et al	2368	chr6	-	4016674	4019294		AAGCAACAAACGTATGCCCAATATTTCAGTCTTGCTGCTCTTCCTCCCCAAATTCAGGAA	intergenic							3827.42	2065.93	11.4552	10.6808	5129.49	11113.2	2905.13	4457.9	2621.09	948.408	698.911	2745.22	2043.13	2445.66	2254.2	4186.58	1296.47	1261.33	974.156	12.2351	12.5182	10.4636	11.9324	11.3659	10.9904	10.9404	11.1956	10.6757
ASHGA5P034897	0.0471705	1.72517	up	noncoding	ENST00000420452	MYCNOS	GENCODE	1313	chr2	-	16076386	16081704		CAGTTTCTCCTAGGATCTTCACACCTCCCTCAAAATGTGTACATTTTTACTGATTAAATA	intronic antisense	NM_005378	MYCN	N-myc proto-oncogene protein	+	16080682	16087129	92.1776	68.5627	6.52104	5.73431	70.1557	163.559	129.04	100.338	67.0702	53.1364	52.1823	101.939	91.943	95.8122	57.0544	86.018	50.5709	47.2727	51.2675	7.38901	6.14401	5.57336	6.08076	5.87414	7.20094	7.69697	6.20917	6.63831
ASHGA5P026529	0.0474049	1.63688	up	noncoding	uc001ogq.1	AX747517	UCSC_knowngene	1190	chr11	+	65778954	65780144		TTGGTAGTTCATTCTGGACAGCCCTCCCGTGAACCGTCCCTGTACTGGCACTTGTTGCTG	exon sense-overlapping	NM_001323	CST6	cystatin-M precursor	+	65779461	65780976	1436.9	923.392	10.2357	9.52479	2768.77	2548.9	1682.48	1207.23	1203.35	496.646	547.546	1040.31	908.444	1338.9	1046.32	1430.75	653.562	436.433	649.333	11.5106	10.1931	9.54053	9.83965	10.1955	10.2442	10.7036	9.65882	9.71152
ASHGA5P019974	0.0474291	2.2323	up	noncoding	ENST00000506106	CTD-2023N9.1	GENCODE	897	chr5	+	56690886	56829251		AATTGCAAAGACACATGAAGACTCAACGATTTATCTCCCATCAACCTCTTCTTAGTTAAT	intronic antisense	NM_001017992	ACTBL2	beta-actin-like protein 2	-	56775842	56778636	205.37	123.713	7.53041	6.37187	105.582	558.901	241.924	218.883	87.5629	132.54	123.385	174.181	233.488	136.638	128.849	218.251	40.196	60.2369	48.3303	7.86376	7.94823	6.54076	7.22114	6.26518	8.54144	8.88721	6.97552	7.96347
ASHGA5P020040	0.0475211	1.53589	up	noncoding	NR_039975	LOC100506229	RefSeq	1529	chr4	-	185814153	185820615	uc010isf.1	AGCTTGCCCTGAGGACAGCACATTGCACTCTCACCTCCTTTGCAGTTAAGTGTGAAATAG	intergenic							140.943	102.829	6.91069	6.29162	126.217	267.044	253.205	133.567	104.72	38.9255	33.0974	170.767	95.4995	160.662	100.287	132.445	97.5471	46.1546	87.2054	8.07654	6.86731	6.6055	6.49742	6.51477	6.75103	7.02869	6.94428	6.69325
ASHGA5P018136	0.0476421	1.50474	up	noncoding	NR_003592	TTTY7B	RefSeq	1124	chrY	+	6317508	6325947	uc010nwj.3, uc010nwr.3	GACATTCATGGCGAATGTGCGGGACCCCATCCATCCCTCACCAGCTTGTATCCTCAGCTT	intergenic							188.683	151.138	7.4811	6.89159	147.099	362.06	275.827	212.835	159.744	93.0491	72.8799	185.965	98.7542	159.053	158.353	261.216	121.209	133.003	126.376	8.25982	7.30268	6.72972	7.18358	7.14572	8.00382	8.15463	7.06882	6.74125
ASHGA5P023110	0.0478113	1.58413	up	noncoding	ENST00000570105	RP11-107D24.2	GENCODE	415	chr15	+	24544895	24545785	TCONS_00023304, TCONS_00023858	CAGAGAAACTGGAACACTAAGGCCCATTCTTCCTCTCAAGTATCCAGAAATAAAGTTGCT	intergenic							76.7617	57.7624	6.11025	5.44655	64.144	150.525	117.681	78.3369	54.5421	25.222	24.1229	99.5197	44.5077	111.957	50.0796	60.1947	43.0704	38.0279	56.4995	7.27772	6.01821	5.42957	5.72628	5.59403	6.11844	6.5439	6.17381	5.53122
ASHGA5P030561	0.0479026	1.5896	up	noncoding	ENST00000564843	RP11-358M11.3	GENCODE	772	chr15	+	57611335	57616106		TTCCTTCTCTTGGCTCCAAGGACATAGAACGGTTGCTATGGGGATTCCTTCATTTGTAAA	intergenic							11.3532	6.6376	3.26537	2.5967	5	21.6001	8.91721	10.7026	8.29386	5	6.67985	24.6321	5	5	5.2397	13.4623	7.76123	5	5	2.62964	3.39422	2.48083	3.13612	3.20879	2.57053	4.46868	4.23413	2.35685
ASHGA5P042255	0.0479489	1.57098	up	noncoding	ENST00000437559	RP11-456H18.2	GENCODE	784	chr6	+	12007902	12009089		TTCAAGTTATTTCCCTCCTCTAGAATGCTGTACTTCCACCACTGCCAAATCGTGAACTTT	exon sense-overlapping	ENST00000491710	HIVEP1	human immunodeficiency virus type I enhancer binding protein 1 [Source:HGNC Symbol;Acc:4920]	+	12008994	12120390	1155.37	788.121	9.87181	9.22014	614.063	2696.05	1320.19	1357.54	804.226	383.647	208.12	1859.09	859.242	1493.62	652.844	1204.49	423	504.103	379.551	9.84817	10.2931	9.17544	10.0228	9.56519	9.9673	9.54813	10.5543	9.63639
ASHGA5P018973	0.0480765	1.81886	up	noncoding	ENST00000462928	RP11-10O22.2	GENCODE	584	chr3	-	162917365	162996361		TTCAGAAGCACATGATTCTTCCCCCTTCCATGATTCCAGTGGCCAATAGAATGGAGTGTA	intergenic							577.162	334.672	8.86669	8.00366	1046.11	1186.92	664.1	656.727	217.382	189.152	201.936	454.96	259.605	499.56	310.379	606.476	204.477	187.075	275.134	10.4473	9.0139	8.05583	8.91959	7.59323	9.02019	9.50965	8.37382	8.12307
ASHGA5P040695	0.0481198	1.63017	up	noncoding	ENST00000509530	CTC-276P9.3	GENCODE	541	chr5	-	134460069	134466939		ACTGTTAAGCTCATGTTTCCTCTCCTGTTGCAAACAATTGTAAAAATGATTGGTATCTGC	intronic antisense	ENST00000432382	CTC-203F4.1	HCG2045138; Uncharacterized protein [Source:UniProtKB/TrEMBL;Acc:G3V3D3]	+	134368969	134680375	53.9553	42.5411	5.62666	4.92164	15.7518	113.744	50.8088	76.2256	54.7589	26.2462	23.0002	71.1072	17.3993	61.8711	34.8514	84.4181	27.1448	43.1724	28.9304	5.59676	5.59926	4.19006	5.68478	5.59903	6.17575	6.46763	5.70001	4.10052
ASHGA5P016813	0.0481462	1.68768	up	noncoding	ENST00000434531	AC005522.7	GENCODE	453	chr7	-	76601995	76606278	ENST00000479299	TGCACAGACTGCCAAGTCTCTCGTCAGGTCTTCGCCGCAAATCTCTCTCCAGAGGATCGT	intronic antisense	ENST00000419923	UPK3B	uroplakin 3B [Source:HGNC Symbol;Acc:21444]	+	76139744	76648340	309.13	194.788	7.9273	7.17227	210.423	595.498	549.464	255.354	121.798	104.315	57.8058	578.383	185.404	453.432	123.596	183.382	115.189	177.777	124.738	8.66254	8.03299	7.7715	7.46262	6.74667	8.16939	7.83151	8.74122	7.65221
ASHGA5P018852	0.0482013	1.64637	up	noncoding	uc002fqa.1	AFG3L1P	UCSC_knowngene	2298	chr16	+	90046649	90063028		CTCTTCTGAAGTCCCCCTTACATTAAAGGCAGGTCCTCCATCTTTAAGGTCCACCTGCGC	intergenic							60.3786	45.4902	5.88699	5.16771	25.6344	119.755	81.7664	57.5638	45.4887	34.0691	40.1988	78.5526	41.8413	51.7207	44.0089	61.6154	42.1533	34.3209	42.7712	6.19949	5.68108	4.88477	5.2827	5.34098	6.55098	7.31217	5.84378	5.43881
ASHGA5P041505	0.0482806	1.60399	up	noncoding	ENST00000523301	RP11-175K6.1	GENCODE	568	chr5	+	158527629	158534225		ATTATTTCCCTTTCTCTCTCTTCAATGTTCCCTTATCCTGAGTATTGAGGTCCCCAAACG	bidirectional	NM_024007	EBF1	transcription factor COE1	-	158122922	158526788	104.445	81.4348	6.6333	5.95164	37.1184	182.724	151.278	119.108	85.0254	71.701	43.0886	145.513	75.9778	111.825	76.3925	140.222	48.8731	49.4482	67.3054	6.65639	6.29854	5.81215	6.3212	6.22313	7.63182	7.40956	6.71364	6.35134
ASHGA5P035320	0.04854	1.68687	up	noncoding	ENST00000419784	RP1-156L9.1	GENCODE	840	chr2	-	132741509	132751734	ENST00000448748	CTCTGTCCTCTTTCTCATACAATTTATCTTTTCCACATATGGATGGAATAAAACTGCAGA	intergenic							14.9057	11.3101	3.94938	3.19503	5.17119	29.1884	21.4722	19.0375	9.08446	6.72871	13.0577	15.505	14.1825	5	10.9452	22.5374	10.3583	10.2626	5.88463	4.06186	3.74452	3.23168	3.78333	3.30842	4.18377	5.6134	3.66808	3.82028
ASHGA5P042886	0.0488262	1.73199	up	noncoding	uc001bxa.1	AX747064	UCSC_knowngene	1360	chr1	-	33607471	33608831		GTAGGAGAGGGGAGGGGGGAAGTACTTTTATTTTGAAATGTGTTCATTTTTCTTTGTTTT	intergenic							24.3838	17.5746	4.54783	3.7554	10.4517	45.0117	55.8182	20.0856	21.779	16.2863	16.5885	9.04919	12.7131	18.9541	11.4548	25.0612	27.9259	14.1577	12.7558	5.04234	4.30322	4.31665	3.84706	4.33849	5.48714	5.9794	3.06833	3.68353
ASHGA5P047963	0.0488883	2.12171	up	noncoding	TCONS_00017228	XLOC_008043	LincRNAs identified by Cabili et al	2498	chrX	+	106947653	106951858		TTGCTGTCTTCTCCCCAGCTTACTTTGCCACCAAGTAATTCTGATTTTTCACCTAGTGGA	intergenic							233.624	144.725	7.80766	6.72243	323.437	405.187	312.58	167.951	138.167	161.951	155.69	204.025	207.843	198.478	159.814	213.759	85.8221	54.4643	92.8936	9.11227	7.46923	6.93163	6.82268	6.93736	8.80376	9.18249	7.20182	7.79994
ASHGA5P040366	0.0489499	1.59668	up	noncoding	ENST00000507887	CTD-2306M5.1	GENCODE	638	chr5	-	25413547	25446034		GTTTATTTACAACCAACATCTCATTTCCCCGTAAGTCTCCATTTCTTCTCATATGCACTG	intergenic							45.5044	34.0095	5.39175	4.71667	18.5015	109.719	49.2601	55.3583	30.7924	28.5421	16.4264	55.4351	37.2365	38.8824	32.6534	50.1705	29.6021	22.8259	26.6956	5.80308	5.55238	4.14583	5.22201	4.80147	6.30128	5.96405	5.34387	5.25553
ASHGA5P017962	0.0490031	1.97143	up	noncoding	ENST00000447702	RP1-81D8.3	GENCODE	122	chr6	+	161119524	161121664		ACTTCAGGTGAGATGGAAGGTTGAACTCTACCTCACCTCCTGGCTACAGAGTGCGGTGGC	intergenic							83.9279	39.8229	5.94075	4.9615	56.6601	103.967	59.1043	50.1699	44.7128	25.1364	19.0249	312.648	33.873	47.4681	40.3837	56.6559	35.0666	29.3434	35.9695	7.13571	5.47402	4.39771	5.0819	5.3199	6.11093	6.18138	7.82443	5.10191
ASHGA5P019979	0.0490066	1.84106	up	noncoding	NR_038989	LOC100507584	RefSeq	3165	chr6	-	33857287	33864684		GAACAGAAAGACCCCAAGGCATCTCCCCAAGATGACCACAGTTGTCCCTGAAGAAGCAGT	intergenic							585.425	387.803	8.99595	8.11541	376.018	1417.05	758.417	678.681	268.227	339.365	202.625	643.022	609.141	536.845	379.948	630.659	148.563	232.768	176.701	9.26714	9.28987	8.28374	8.96669	7.90881	9.8162	9.51552	8.91959	9.2226
ASHGA5P016510	0.0490816	1.85538	up	noncoding	ENST00000431145	ZFY-AS1	GENCODE	419	chrY	-	2869668	2870612		GAGGCTAAAGTCCTGTCAACCATCATCTACATACTGTCTCCCTGAATTTGACTATTCCAG	intergenic							91.3041	59.333	6.36225	5.47053	28.3011	222.761	128.066	102.56	37.1252	68.8217	47.7796	95.0193	72.1296	65.0303	66.3755	104.568	35.7137	44.0064	27.5074	6.32333	6.592	5.56066	6.11291	5.06462	7.57139	7.56973	6.10337	6.26443
ASHGA5P053098	0.0490956	1.7169	up	noncoding	uc003tuh.3	CCT6P1	UCSC_knowngene	1675	chr7	+	65216091	65228662	NR_003110, uc003tui.3	TTTCTTTTCTTCCTCTGGAGCAGTTATGGCGGCGGCGAAGACCCTGAACCCCAAGGCCAA	intergenic							16.7844	12.0969	4.13857	3.35877	6.15037	29.5973	23.7168	18.9497	13.6355	7.21592	19.6017	15.408	14.5737	8.21088	9.15123	17.9725	11.8665	14.4687	8.43503	4.30572	3.75944	3.33911	3.77797	3.75873	4.28516	6.22131	3.66111	3.8531
ASHGA5P045709	0.0491699	2.12702	up	noncoding	NR_024283	LOC158376	RefSeq	1546	chr9	+	35909479	35911617		AGTTTTTATTAACAGAAAACCCATTCTCCCATGGCCATGGAATAAATGCCATGCTATATT	intergenic							14.1718	7.98168	3.91388	2.82505	6.49091	37.2464	14.3964	13.0985	6.01538	12.8902	17.3914	5.84482	11.4851	6.50979	8.39034	13.1016	5	6.38492	5	4.37988	4.04564	2.81841	3.36744	2.87176	5.14863	6.0535	2.62576	3.5561
ASHGA5P033154	0.0492713	2.07614	up	noncoding	NR_024560	MAPT-IT1	RefSeq	3024	chr17	+	43973148	43976164		AACTGGACCTTGCCTTCTATTGATGTATTTATTTAGCATCTTCCTTACTCCCTCCTTGAA	intron sense-overlapping	NM_001123066	MAPT	microtubule-associated protein tau isoform 6	+	43971747	44105699	3534.68	1700.15	11.2153	10.1614	2667.99	11710.6	3938.56	4759.68	1941.8	627.402	402.838	2228.6	1659.22	1700.57	1837.67	4497.11	862.026	1029.17	315.271	11.4785	12.6127	10.9293	12.0479	10.9019	10.5149	10.3814	10.8555	10.4351
ASHGA5P037297	0.0493797	1.6467	up	noncoding	ENST00000457669	AP000696.2	GENCODE	1133	chr21	-	38004978	38009331		ATGGGTTTATCTTTTGGGACCAAGACATTGGGTCCCTACATGTTTTCCCCTACCCTTCTT	intergenic							37.2159	22.7733	4.76631	4.04673	21.4961	121.532	48.2736	46.964	19.7144	6.35493	7.80875	25.5833	20.4624	19.5317	19.2483	50.6031	22.3888	13.7236	13.4553	5.98572	5.70064	4.11767	4.99312	4.21086	4.09876	4.73899	4.28468	4.34334
ASHGA5P052148	0.0494117	1.82432	up	noncoding	ENST00000507869	AC108142.1	GENCODE	2129	chr4	-	182896308	183006289		CTTCCTCTTCCTCTTTCTTTATGGATGGCAAACAGCGTTCAGATGACAGATTTTGGAAAA	intergenic							185.694	132.779	7.50814	6.64077	151.042	367.623	241.995	172.469	168.445	105.914	107.895	170.17	168.362	143.356	153.638	229.853	74.4608	72.311	87.4737	8.29395	7.32478	6.54203	6.86509	7.2215	8.19379	8.68538	6.93858	7.50523
ASHGA5P015008	0.0494472	1.73679	up	noncoding	ENST00000415637	RP5-1018K9.1	GENCODE	568	chr1	+	169073361	169074145		GAAGAGCTAAGGTTTTCCCTCCTGTTACAGTAATGGACACTCAACAACACATACCCTTCC	intergenic							552.424	291.564	8.48765	7.69122	227.55	1981.95	626.284	642.202	248.043	108.119	61.4008	523.844	255.891	437.05	279.549	631.603	155.964	168.249	112.644	8.74122	9.77568	7.96836	8.8799	7.79624	8.23226	7.91735	8.59017	8.09658
ASHGA5P030161	0.0494863	1.72584	up	noncoding	ENST00000561777	MIR4313	GENCODE	2905	chr15	-	76051841	76054746		AGGAAGTTGAACCTTTCAGAGTTCCCCTTCTCATGTCATATGCTATTTCTGTTTTGAAAT	intergenic							20.6378	15.0559	4.34519	3.5579	13.769	42.9639	32.2218	20.2871	24.5101	7.77394	10.0647	13.5123	11.4672	11.9105	23.8529	26.0273	15.4047	6.82347	9.90552	5.4166	4.23434	3.66185	3.85998	4.48615	4.40811	5.17589	3.51865	3.55466
ASHGA5P046101	0.0495388	2.08057	up	noncoding	ENST00000456559	RP11-733O18.1	GENCODE	446	chrX	-	5571463	5644121	ENST00000422914, ENST00000444185	GACATCTTGCTCTCCCAACTTCTTGCTTTGACCAAATTGAATAAATCTTGTTTGATCTCC	intergenic							182.464	115.385	7.4725	6.41551	100.709	383.062	190.324	194.025	93.6125	157.487	161.773	178.718	198.03	131.741	93.0299	181.387	69.9215	67.6016	65.9871	7.81641	7.38187	6.16822	7.04227	6.36191	8.76508	9.23169	7.01251	7.74113
ASHGA5P039554	0.049549	1.85987	up	noncoding	ENST00000511590	RP11-119H12.6	GENCODE	712	chr4	-	113801615	113803486		CACTTAATTTTCCTCCTTTTGTAAACTGGCAATCTTGACTCTAACATTGCTAGGAATTAC	intronic antisense	NM_001127493	ANK2	ankyrin-2 isoform 3	+	113739238	114304896	12.3403	7.69938	3.70206	2.80686	8.79364	33.8501	10.2195	13.946	5	7.10127	8.98338	10.8282	10.1629	5	8.836	14.67	5.22674	5	5	4.80898	3.92603	2.56074	3.43768	2.3654	4.26098	4.98437	3.27232	3.41063
ASHGA5P038657	0.049632	1.72561	up	noncoding	ENST00000453454	AC024560.3	GENCODE	956	chr3	-	197305083	197342531		TCAATCTGGTGGTCTTTTGTTTCCAGCTCTCCCCAATATCCCTATTGTGCATTCCTCATG	intergenic							262.299	181.382	7.86775	7.08064	102.988	708.211	281.828	308.159	180.578	160.62	108.645	247.362	211.901	225.433	182.927	332.103	101.028	98.4319	117.849	7.83857	8.29053	6.76814	7.75335	7.32289	8.79266	8.69555	7.48031	7.82036
ASHGA5P023036	0.049678	2.18258	up	noncoding	ENST00000568208	RP11-1166P10.1	pseudogene	1670	chr16	+	31987123	32015049		GCAGGATGAGATCCGGGATCTCCCAGGACACTACTTTGAAACGCTCAAATTCCTTGTGGG								20.7176	12.5156	4.39037	3.26434	10.0189	48.9801	26.5764	16.0948	6.27294	16.6959	17.0329	24.0686	27.9228	12.1811	14.2808	16.3068	6.74134	5.17613	5	4.98122	4.42258	3.45974	3.59984	2.91062	5.52559	6.02312	4.20027	4.81458
ASHGA5P058447	0.0498842	1.5811	up	noncoding	uc003qeg.1	BC041459	UCSC_knowngene	2960	chr6	-	133823389	134210120		TGATGGAAAAGATATACTAAAAGAAGACAGATCAGTCTCTCTCCTGATAAGAAGAGTCAC	natural antisense	NM_004100	EYA4	eyes absent homolog 4 isoform a	+	133562494	133853258	119.325	78.7768	6.544	5.88307	67.37	330.666	154.112	149.881	68.0037	37.9851	19.1389	127.442	93.151	120.531	61.7194	128.443	41.2187	61.7766	44.5979	7.33708	7.17943	5.84378	6.66654	5.89402	6.7187	6.1886	6.52386	6.65639
ASHGA5P034108	0.0498864	1.67031	up	noncoding	NR_038869	LOC254099	RefSeq	1640	chr1	+	1072396	1079434		TGTCCTGCTCTCATACGAACTTGTGTCTAAAACTGTGGTCTTTGCTTTTCTCCCAAACCC	intergenic							114.815	80.2252	6.66046	5.92034	77.1721	308.066	140.538	132.164	87.1476	46.8859	37.9484	88.5994	118.181	83.2283	80.1727	129.311	51.8652	51.9492	46.8694	7.51065	7.07426	5.69883	6.48197	6.25793	7.01594	7.23124	6.01289	6.98674
ASHGA5P020028	0.0499561	1.5222	up	noncoding	NR_027650	C15orf40	RefSeq	991	chr15	-	83673144	83680393	NR_027649	CCAGTAGCAGGGTAAAAGCCAGAGCAAGGAACCAGAGAGACCACTTCCTCCCTTAGGTCC	exon sense-overlapping	NM_001160113	C15orf40	UPF0235 protein C15orf40 isoform b	-	83676701	83680393	1021.79	605.387	9.49428	8.88812	735.387	3285.33	1270.88	1152.96	535.748	198.837	143.61	851.586	532.079	759.015	560.522	1179.07	446.173	429.632	331.223	10.0674	10.5618	9.11634	9.75396	8.92269	9.09498	9.07213	9.36491	9.04831
ASHGA5P017756	0.0499602	1.52759	up	noncoding	ENST00000445420	RP11-445H22.4	GENCODE	452	chr20	-	43323842	43374636	uc002xml.1	GCAATATTAGGTGGCCACCAGACTTTCTCTGCTTGTATCCTCCCAGGACCACAGAACTCA	intronic antisense	NM_003881	WISP2	WNT1-inducible-signaling pathway protein 2 precursor	+	43343884	43356452	58.9096	47.3027	5.77219	5.16094	36.1745	122.911	77.3325	76.6105	40.4293	24.7007	21.4387	71.6791	51.2043	60.1636	37.766	82.3312	34.691	30.6212	34.3418	6.62522	5.71778	4.79385	5.69206	5.18786	6.08763	6.36011	5.71303	5.7432
ASHGA5P022307	0.049984	1.63787	up	noncoding	ENST00000554205	RP11-325D8.1	GENCODE	547	chr14	+	88034524	88035743		AAGGAGCAAGAATAATGTCCCTCATCTCCAAAGATGTCCGTGTCCTATCTCCTAATCACA	intergenic							40.8693	31.1249	5.25521	4.54339	18.4003	93.0259	58.5075	55.6438	35.1888	21.4577	17.3349	27.3955	34.7367	18.4102	35.5186	59.2408	25.9986	27.3759	16.5935	5.79771	5.32644	4.38483	5.22973	4.9898	5.8909	6.04931	4.37298	5.14403
ASHGA5P030501	0.000154159	-2.54501	down	noncoding	ENST00000558006	RP11-151N17.1	GENCODE	653	chr15	+	44850026	44851386		CAAGAAAATGGAGACATCATGGGATAGGGTGTTGTCATTGTAGGTTTAAGAATTGTCATT	intron sense-overlapping	NM_003758	EIF3J	eukaryotic translation initiation factor 3 subunit J	+	44829265	44855001	11.9679	29.2643	3.03053	4.3782	5	16.6208	30.5532	18.3279	7.35682	5	5	7.88411	23.7864	39.6562	6.76193	37.3047	46.1895	30.6961	20.455	2.62964	3.08685	3.605	3.74297	3.08276	2.57053	2.61568	2.91084	4.56413
ASHGA5P031963	0.000508897	-1.81207	down	noncoding	TCONS_00029809	XLOC_014244	LincRNAs identified by Cabili et al	1397	chr22	+	39462293	39465987	TCONS_00029808	TACAAGGTGCTTGGTGGGGGAACTTCTGAGACTCATTGTCCAGGAGAAATAACTTCACAA	intron sense-overlapping	ENST00000452957	APOBEC3G	apolipoprotein B mRNA editing enzyme, catalytic polypeptide-like 3G [Source:HGNC Symbol;Acc:17357]	+	39436923	39483735	6.63484	15.0724	2.61238	3.47001	5	5.77543	14.1409	7.43529	5.72711	5	5	5	11.2229	19.0401	5	20.2495	22.1052	17.3888	10.5004	2.62964	2.35161	2.80185	2.76409	2.82541	2.57053	2.61568	2.34018	3.52726
ASHGA5P045714	0.000731805	-4.28457	down	noncoding	ENST00000509911	RP11-297B17.3	GENCODE	739	chr9	+	37002693	37008037		GTCCGGTTTCTTTGGAAAAGTTATATTCCAGTCTCAAACTATTACCTTTTGAAAGGACAT	natural antisense	NM_016734	PAX5	paired box protein Pax-5	-	36838530	37034476	20.0627	72.3636	3.61325	5.7124	5	38.7143	37.7824	43.9332	5	10.779	5	14.2925	106.452	49.2838	27.2411	68.244	81.7548	130.668	42.9018	2.62964	4.09615	3.83556	4.89865	2.3654	4.88549	2.61568	3.57946	6.84346
ASHGA5P046329	0.000775054	-2.28745	down	noncoding	uc001iqf.3	BC014575	UCSC_knowngene	1401	chr10	-	19999259	20017479		CACACCAAAGAAGTGTGCATTATTCAATAAATGTGTTCCTGATATGTTGCATGTAAACTG	intronic antisense	ENST00000377265	C10orf112	chromosome 10 open reading frame 112 [Source:HGNC Symbol;Acc:24331]	+	19778022	20023405	7.51457	20.2021	2.70655	3.90029	5	11.763	7.25367	10.5957	5	5	5	10.5042	28.2263	27.0535	5.78304	11.0363	31.3742	24.0957	13.846	2.62964	2.70697	2.40426	3.12433	2.3654	2.57053	2.61568	3.2356	4.83213
ASHGA5P046308	0.00111448	-2.94552	down	noncoding	TCONS_00001546	XLOC_000889	LincRNAs identified by Cabili et al	1296	chr1	-	84542061	84543595		GTGGATGTAATATTTTGCCCCACATACATAGAAAGTTCAATGAATAGCACTGAACCACAT	intergenic							18.8956	43.0814	3.37763	4.93616	5	25.4471	53.2978	32.0648	7.31845	5	5	18.0365	43.2972	35.8086	12.9859	53.5378	56.7336	76.8272	22.3791	2.62964	3.58286	4.25103	4.45218	3.07618	2.57053	2.61568	3.84297	5.49012
ASHGA5P022793	0.00126638	-4.14231	down	noncoding	ENST00000562920	RP11-23P13.6	GENCODE	400	chr15	+	42187382	42188141		GTGTGATGTTCTCAACGGCAGCTAAAGCCACTGCATACAATGCAAGGACTGGCTCCTGTT	intergenic							41.1988	182.467	4.76904	6.81947	10.1049	57.436	110.231	51.6274	28.2317	17.2432	5	49.7163	96.1062	110.999	33.0635	314.486	274.14	372.527	75.9488	4.9959	4.64337	5.3285	5.11899	4.68321	5.5696	2.61568	5.19705	6.70284
ASHGA5P029183	0.00152708	-2.99775	down	noncoding	ENST00000555796	CTD-2555O16.2	GENCODE	435	chr14	-	64907297	64908481		TTTAACATCAGGTCACTCTATTAAGCCATCAAAGTGTAGCTGAACTACCTAGCAACAAAG	intronic antisense	NM_005956	MTHFD1	C-1-tetrahydrofolate synthase, cytoplasmic	+	64854758	64926725	22.9129	45.3538	3.54197	5.12585	5	23.5988	66.8242	49.0786	16.4368	5	5	12.3646	55.3786	49.5129	18.9835	46.5412	58.4219	50.5339	38.1046	2.62964	3.49738	4.57633	5.05065	3.97682	2.57053	2.61568	3.41872	5.86947
ASHGA5P056775	0.00157248	-2.52246	down	noncoding	TCONS_00008562	XLOC_004057	LincRNAs identified by Cabili et al	318	chr4	-	120559332	120578304		GAAGAACAAGATGGATAAGCCCCTGTATATCAACTGAATTCTTGGTTGCTACAAGAGACT	intergenic							12.5008	29.6942	3.13635	4.47118	5	12.0518	24.9468	15.0776	11.4481	5	5	21.4821	24.4306	26.3794	11.7564	17.0232	50.4967	39.7823	37.9913	2.62964	2.73074	3.39381	3.52587	3.56606	2.57053	2.61568	4.05846	4.60664
ASHGA5P057753	0.0019215	-2.95718	down	noncoding	TCONS_00021766	XLOC_010361	LincRNAs identified by Cabili et al	365	chr13	+	42079326	42080461		TCTGCTCTTGGTCAAAACTGTAGAATGTTCAGCTCTGATGAGATAAACTGAGGCTGCTTG	intergenic							21.3162	46.3803	3.51076	5.07498	5	43.0329	51.8002	29.6811	10.4126	5	5	20.6024	34.8589	25.8815	17.3883	52.813	65.7428	51.8364	76.1409	2.62964	4.23678	4.21522	4.35064	3.46073	2.57053	2.61568	4.00685	5.14899
ASHGA5P039155	0.00196958	-2.13163	down	noncoding	ENST00000467896	RP11-185E8.1	GENCODE	229	chr3	+	171185872	171187422		ATGGCAGGGCTGAAAATGATTAGTGTTAATTCATTCCAGTTGTGTTACCCTACCCATAAG	intergenic							87.2631	163.479	5.92904	7.021	10.6958	188.068	143.415	106.496	79.0947	24.0352	11.1102	135.19	179.857	129.08	88.8574	159.538	196.55	209.722	180.746	5.07304	6.34072	5.72819	6.16763	6.11642	6.05098	5.34649	6.60887	7.5978
ASHGA5P025663	0.0022	-3.4915	down	noncoding	NR_024433	LOC283663	RefSeq	2534	chr15	+	57592562	57599967		CAAGGAGAAGAAATGCCTGGGGCCCACGAACATCCCAGTGTGGCCCTGGACGGGACATCA	intergenic							454.412	1108.28	7.99445	9.79829	53.0839	747.627	998.64	892.029	295.567	89.6539	14.3357	544.361	669.08	1051.95	479.279	1201.82	1648.21	1766.19	941.429	7.06072	8.36475	8.729	9.3833	8.05983	7.94981	5.75348	8.65469	9.33438
ASHGA5P036387	0.00258846	-1.59414	down	noncoding	ENST00000454444	AC007879.4	GENCODE	551	chr2	+	208091672	208093032		CTGCAACAAACTGTGGAATAATCTGACATAGGAAGAGGTGGATGGTACAGAAGAACAATA	intergenic							5.71343	11.8538	2.51756	3.19034	5	8.39184	5.05202	5	5	5	5	7.26358	13.3088	12.1154	5	23.6024	7.90229	13.2094	7.83822	2.62964	2.46611	2.33284	2.33704	2.3654	2.57053	2.61568	2.82326	3.73876
ASHGA5P021371	0.00266049	-4.14425	down	noncoding	uc001phz.3	LOC643733	UCSC_knowngene	1785	chr11	-	104772275	104788902		AGAAGATGATAGGGTGGGACTCATTACGTCTAATCTTGGGGAACACTGATAACGTGTCCA	intergenic							25.4031	81.8499	3.63289	5.68401	5	7.4758	70.1935	50.9959	19.4999	5	5	40.0597	33.3574	47.5816	24.8676	138.805	82.3986	203.077	42.862	2.62964	2.4182	4.6417	5.10382	4.19764	2.57053	2.61568	4.88594	5.08242
ASHGA5P021606	0.00277279	-5.7631	down	noncoding	ENST00000536112	RP11-81H14.2	GENCODE	417	chr12	-	68825634	68826434		TGCAGTTGTGTGACCTTGGGTAGTTTCTTCAACTACAGAAAGAGAGTTGAGCAGATGCTC	intergenic							44.9139	167.31	3.91087	6.43772	5	35.5683	164.293	114.713	8.39387	5	5	21.3435	54.9384	163.854	24.855	569.991	115.616	190.66	51.2583	2.62964	3.98517	5.94564	6.26626	3.22359	2.57053	2.61568	4.05048	5.85741
ASHGA5P034766	0.0028939	-2.29244	down	noncoding	ENST00000452378	RP4-635E18.7	GENCODE	2682	chr1	+	11128527	11133154		TGTGCTCTCATTCTTACTCATAATGCTGGTAAAAACAAGCCAGATAAGTAAGATAGAGTG	natural antisense	NM_001001998	EXOSC10	exosome component 10 isoform 1	-	11126675	11159938	13.5978	24.3213	3.01563	4.21251	5	16.39	39.6589	25.2369	5	5	5	7.49699	35.5584	17.7282	10.7605	27.6868	25.2334	38.9668	14.3149	2.62964	3.06854	3.88841	4.13159	2.3654	2.57053	2.61568	2.85522	5.17995
ASHGA5P015887	0.00292323	-3.01861	down	noncoding	ENST00000424436	RP4-742C19.12	GENCODE	592	chr22	+	39487638	39488860		AAGTTGCAGGAGGCCAGGAGCCAGGAGGGGAAACCACTCAGTTTGCAAAACGTCGCTTCC	intergenic							16.7342	45.6116	3.31746	4.91134	5	33.0948	35.2037	25.497	17.3626	5	5	7.71571	36.4532	28.4945	9.49382	44.5977	48.051	117.433	34.7579	2.62964	3.89915	3.75229	4.14412	4.0431	2.57053	2.61568	2.88517	5.21743
ASHGA5P048959	0.00316611	-1.86833	down	noncoding	TCONS_00025355	XLOC_012177	LincRNAs identified by Cabili et al	1090	chr17	+	33640517	33652433		TTATCGGGTGGCAGCAGAGTTGGAATGGGATAGGTAGTTCCCCGTTTCCAGGACCCCAGA	intergenic							14.8964	21.5827	3.14005	4.04179	5	24.0406	47.6406	16.8518	6.61541	5	5	9.02303	14.1079	22.9209	9.06188	29.9278	24.5333	31.8877	18.6395	2.62964	3.51951	4.10014	3.64959	2.96996	2.57053	2.61568	3.0653	3.81375
ASHGA5P000071	0.00324423	-2.50034	down	noncoding	AL137474		NRED	2600	chr7	+	50518333	50521015		CCTATTGGGATTGAAACCCTTATGTCATATCAAAACTTTTCCATCTTTGACAAATGAGAC	intergenic							16.8208	34.1808	3.33652	4.65865	5	17.2344	40.0175	34.1775	11.1091	5	5	17.0281	56.9498	29.8856	10.2583	41.4576	37.3805	34.1677	29.1663	2.62964	3.1318	3.89685	4.54548	3.53146	2.57053	2.61568	3.77076	5.9141
ASHGA5P054467	0.00326663	-3.60625	down	noncoding	ENST00000443523	RP11-556E13.1	GENCODE	369	chr10	-	54316742	54515169		GTTGAATGTACAGCTGGTATAAAAATGGTGCTTTGTCGTCATGAAGAAGGTGTATTCTGG	intergenic							38.222	98.8354	4.2237	6.0742	5	105.93	67.7666	45.0492	40.6748	5.02529	5	31.3299	73.7212	91.5967	18.6471	99.6483	203.786	117.22	87.2284	2.62964	5.49664	4.59557	4.93263	5.19687	3.76716	2.61568	4.55542	6.302
ASHGA5P008320	0.00343848	-1.53194	down	noncoding	NR_027918	CCDC62	RefSeq	2506	chr12	+	123259055	123311927		ATTTTCATGTGAGTAAAATAAGGAAGGAACGTTCATCACTTTAAACTGAACCTGGCAAGT	exon sense-overlapping	NM_201435	CCDC62	coiled-coil domain-containing protein 62	+	123259055	123311927	8.97375	12.7084	2.76385	3.37921	5	20.4518	15.5399	9.14117	5	5	5	6.6571	10.1684	8.89871	5.24988	15.2377	18.2741	19.5209	11.6093	2.62964	3.33546	2.89302	2.96412	2.3654	2.57053	2.61568	2.73696	3.41161
ASHGA5P016376	0.00352689	-2.6005	down	noncoding	ENST00000446528	RP4-717I23.3	GENCODE	489	chr1	-	93730201	93792474	ENST00000429859, ENST00000450843	CAACATACAAGAGGGCTCTGAGAGATTTCATTTCTGTCCTGCTGATGAAGTCTACGTTCA	natural antisense	NM_206886	CCDC18	coiled-coil domain-containing protein 18	+	93646280	93744287	282.928	522.478	7.29481	8.6736	22.726	732.612	802.575	297.577	164.436	65.2683	22.2236	156.006	617.783	581.609	209.174	380.962	793.603	601.368	472.848	6.05638	8.32987	8.37545	7.69164	7.18442	7.49376	6.41684	6.81009	9.2398
ASHGA5P030495	0.00354557	-2.96808	down	noncoding	ENST00000457799	RP11-367J7.2	GENCODE	414	chr1	-	157644110	157646522		ATCACATAATTTATTACAGGTGTGTTCTGGAATAGTTTCTATAAATTGATCCATTCTTGT	exon sense-overlapping	ENST00000292392	FCRL3	Fc receptor-like 3 [Source:HGNC Symbol;Acc:18506]	-	157646272	157670775	33.9664	93.2972	4.48956	6.05909	5	48.5113	88.2724	51.0813	28.0725	18.0813	5.42834	27.2844	183.854	79.0955	37.7569	115.246	84.4413	112.768	39.9174	2.62964	4.40843	4.99765	5.10591	4.67474	5.63785	4.09535	4.36695	7.63857
ASHGA5P044616	0.00357505	-1.83711	down	noncoding	TCONS_00001218	XLOC_000490	LincRNAs identified by Cabili et al	805	chr1	+	184090199	184091540		ACAGGAGGTAGAAGAAAAGTGTTCTCTCACTAAAGCATGGTGGGTGTTTTCAAAATGTTT	intergenic							11.2867	18.0925	2.92872	3.80616	5	19.5329	30.9148	12.9272	6.9184	5	5	5	17.8927	9.07478	7.61706	24.9772	24.505	26.7899	15.7907	2.62964	3.2826	3.61798	3.35332	3.01982	2.57053	2.61568	2.34018	4.13972
ASHGA5P010277	0.00378659	-5.50656	down	noncoding	ENST00000360485	RP11-81H14.2	GENCODE	471	chr12	-	68825625	68845165		GTGATTTGGATTGAGCAGATGCTCCGGCTGCCACTCCATCATATATTGGAAACAGCATTA	intergenic							61.1875	191.005	4.3907	6.85185	5	72.2737	146.885	183.279	24.6738	5	5	47.3892	102.45	173.209	39.3011	577.211	127.545	227.971	89.3446	2.62964	4.96716	5.76485	6.95436	4.49801	2.57053	2.61568	5.12539	6.78873
ASHGA5P015836	0.00379121	-4.90353	down	noncoding	NR_027286	FLVCR1-AS1	RefSeq	688	chr1	-	213029945	213031480		CCCACTAAAGAGGAATAACGCCAGAAAGTGTTCCAGTACAACCAGAGAAAGAGAGTCCAT	bidirectional	NM_014053	FLVCR1	feline leukemia virus subgroup C receptor-related protein 1	+	213031596	213072705	78.6211	192.548	4.85773	7.15155	5	169.299	228.445	112.82	78.2388	8.65747	5	21.5082	140.939	102.259	102.088	270.713	383.151	215.051	133.632	2.62964	6.1951	6.45449	6.24213	6.10064	4.56473	2.61568	4.05944	7.24009
ASHGA5P022874	0.0038509	-3.30847	down	noncoding	NR_033249	GCSH	RefSeq	1474	chr16	-	81115551	81129980		TTTTGCACAGATGAGTTTGGTGCTTTGGAAAGTGTGAAAGCTGCTAGTGAACTCTATTCT	exon sense-overlapping	NM_004483	GCSH	glycine cleavage system H protein, mitochondrial precursor	-	81115551	81129980	30.3626	64.3301	3.75618	5.48234	5	50.7758	103.689	40.0043	18.3884	5	5	15.0433	76.3643	43.3889	14.9077	77.4246	109.958	87.6206	40.6465	2.62964	4.47086	5.24072	4.76539	4.12216	2.57053	2.61568	3.63443	6.36191
ASHGA5P019362	0.0038513	-1.87685	down	noncoding	ENST00000479900	GUSBP2	GENCODE	1203	chr6	-	26839262	26924333		TGAAGGAAGGAACCGAAGGTTTACAAGTATTGTGGCTGAAGGCTGTGTCTATTCCTGCTT	intergenic							7.0899	13.9814	2.59821	3.50653	5	8.45838	13.5649	9.69591	5	5	5	5	24.8459	7.99143	6.38784	13.4358	8.88317	22.6961	13.6296	2.62964	2.46998	2.76705	3.02721	2.3654	2.57053	2.61568	2.34018	4.63281
ASHGA5P055252	0.00387134	-3.93816	down	noncoding	ENST00000545357	RP11-664D1.1	GENCODE	558	chr12	+	4008218	4019472	ENST00000537149	ATGGCTTTTGTCATTTGAATTATCAGTAGCTGTCTCGGAGCTATTACGCTTCACTGGGCC	intergenic							280.771	683.829	7.01008	8.9876	6.68634	612.511	1028.55	220.126	137.676	58.4255	22.7871	159.406	1276	353.648	304.528	682.768	649.113	595.285	925.463	4.4221	8.07407	8.78632	7.22962	6.93198	7.33991	6.4559	6.8407	10.1048
ASHGA5P057732	0.00399592	-4.12822	down	noncoding	TCONS_00021289	XLOC_010016	LincRNAs identified by Cabili et al	214	chr12	-	10433067	10443823		TTTAATCAAGGTCCTGGAAATGGCTAGAATCTGTCCTGAACTCTTGGCATCTTCTGATAC	intronic antisense	ENST00000544747	KLRD1	killer cell lectin-like receptor subfamily D, member 1 [Source:HGNC Symbol;Acc:6378]	+	10378656	10467418	348.963	1000.67	7.55523	9.60075	9.69612	654.783	859.739	830.564	138.626	133.666	56.1424	108.49	1049.52	762.495	429.39	1727.51	667.681	1486.95	881.142	4.93529	8.16332	8.48416	9.27499	6.94017	8.55886	7.79135	6.29369	9.8777
ASHGA5P018604	0.00413964	-2.38221	down	noncoding	ENST00000455474	RP4-717I23.3	GENCODE	299	chr1	-	93730206	93803026		GGTATTGAAAGAGGGCTCTGAGAGATTTCATTTCTGTCCTGCTGATGAAGTCTACGTTCA	natural antisense	NM_206886	CCDC18	coiled-coil domain-containing protein 18	+	93646280	93744287	257	462.489	7.23046	8.48276	29.2095	624.89	744.594	289.977	153.833	55.7739	23.9874	133.731	572.769	454.608	189.152	321.924	731.687	550.495	416.787	6.35759	8.0994	8.25705	7.6471	7.08825	7.27076	6.53181	6.59168	9.1406
ASHGA5P033576	0.00425936	-3.82742	down	noncoding	ENST00000582233	RP11-53I6.3	GENCODE	473	chr18	-	29671257	29672082		GAGAAATGCCGTAGAAGCATGGACGTGGCTTTTCACCAAGGTTATTCACTAATTTAAGTG	natural antisense	NM_016271	RNF138	E3 ubiquitin-protein ligase RNF138 isoform 1	+	29671817	29711524	51.8268	133.405	4.70079	6.63716	5	73.4099	133.706	94.641	37.6658	16.4736	5	48.7181	222.981	105.491	62.6049	127.538	177.741	168.165	69.3096	2.62964	4.9898	5.62782	5.99021	5.08219	5.50473	2.61568	5.16624	7.8966
ASHGA5P057646	0.00432533	-2.76912	down	noncoding	TCONS_00020350	XLOC_009681	LincRNAs identified by Cabili et al	1047	chr12	+	19705711	19706887		TTCTGCTTTTACAGCCTTCTTTGGCTTTCTGACAAGAGCAACTGCTGAGCAGAAGCACTT	exon sense-overlapping	ENST00000398731	AEBP2	AE binding protein 2 [Source:HGNC Symbol;Acc:24051]	+	19653062	19706173	32.7259	67.3128	4.15892	5.62835	5	63.0435	79.7087	42.7456	33.1792	7.49176	5	25.6384	75.3232	70.2034	20.0035	74.7277	109.645	60.338	60.9493	2.62964	4.77647	4.84432	4.86161	4.90778	4.34817	2.61568	4.2877	6.33615
ASHGA5P044460	0.00433005	-2.50648	down	noncoding	ENST00000577199	RP11-1C8.6	GENCODE	777	chr8	-	104395305	104396082		TGTCTGATATTCTCTACCAAATGGTAAGGAATTTGAGGATAGAATCCATCCTTTGTTACC	intergenic							14.5898	32.3012	3.21767	4.54333	5	19.8149	25.2029	32.7484	6.34138	5	5	17.6104	45.5927	15.8646	9.89058	36.7351	42.3453	54.5955	21.0848	2.62964	3.29895	3.40518	4.48506	2.92322	2.57053	2.61568	3.81306	5.56485
ASHGA5P037105	0.00448032	-1.6639	down	noncoding	ENST00000558899	RP5-914P20.5	GENCODE	572	chr20	+	49547520	49561316		GAACAGCTTCCAAAATCTTATTCACAGAGGTTTTGTGGTCTTTTGGGCTAAGAATTTAAT	intronic antisense	NM_003859	DPM1	dolichol-phosphate mannosyltransferase	-	49551404	49575060	11.3631	17.3058	3.01135	3.74593	5	18.2572	25.7159	13.6763	5.33474	5	5	12.9208	12.6969	20.4504	5.46903	20.5285	20.4738	24.4256	17.0966	2.62964	3.2019	3.42551	3.41796	2.76307	2.57053	2.61568	3.46654	3.68182
ASHGA5P055253	0.00474792	-2.73784	down	noncoding	ENST00000537149	RP11-664D1.1	GENCODE	678	chr12	+	3980899	4019504		GGGCCCTGGAGGATATTGTCTTATACAGTCCACTGGGTTTTGGATATGCAGTCTGTGCCT	intronic antisense	NM_020367	PARP11	poly [ADP-ribose] polymerase 11	-	3918026	3982608	580.585	1412.92	8.60953	10.0626	67.5015	1105.09	1961.37	513.643	270.53	245.286	160.709	320.556	2788.42	766.54	691.947	1296.32	1211.32	1064.37	2071.52	7.33936	8.9092	9.7668	8.4931	7.92314	9.35904	9.22334	7.86227	11.0983
ASHGA5P017416	0.00483373	-2.12735	down	noncoding	ENST00000441249	RP11-445F6.2	GENCODE	914	chr6	+	139592498	139608444		CTGAAGTCAGATGCCAAGGGGAAAGTGACTTTACCCACGAGAGAGATTTTTAAATATTCC	intronic antisense	NM_153235	TXLNB	beta-taxilin	-	139561198	139613208	9.31447	23.0417	2.92705	4.0161	5	21.9197	5	11.1625	7.99733	5	5	13.4362	25.0788	22.365	5	26.3424	34.9558	28.4647	19.0854	2.62964	3.41338	2.32183	3.18379	3.16824	2.57053	2.61568	3.51329	4.64659
ASHGA5P051589	0.00483969	-1.99375	down	noncoding	ENST00000489609	FAM86DP	GENCODE	839	chr3	-	75471868	75484186		CTGTTTCCAGGCCGGGCTGGGATCATATGGGAAGCGGAAGCTCATCATGACCAGAAACTG	intergenic							12.384	21.3958	3.00363	3.99912	5	24.5045	34.1181	12.7229	6.0723	5	5	6.65452	9.75298	14.2376	8.61467	27.0682	26.6442	33.3065	30.1462	2.62964	3.5415	3.71912	3.33653	2.87955	2.57053	2.61568	2.73649	3.36502
ASHGA5P018733	0.0049097	-2.35317	down	noncoding	ENST00000457025	RP4-717I23.3	GENCODE	413	chr1	-	93730196	93804088		GGACTAAATTGAGGGCTCTGAGAGATTTCATTTCTGTCCTGCTGATGAAGTCTACGTTCA	natural antisense	NM_206886	CCDC18	coiled-coil domain-containing protein 18	+	93646280	93744287	260.048	470.99	7.26511	8.49971	30.1831	691.201	693.606	290.275	161.32	67.3913	23.7394	122.666	594.852	467.699	166.242	373.947	726.598	564.168	403.423	6.4008	8.25505	8.13621	7.64883	7.16115	7.54025	6.51477	6.4638	9.1882
ASHGA5P018244	0.00495741	-2.08126	down	noncoding	ENST00000451149	RP11-389O22.1	GENCODE	436	chr1	+	113576294	113589677		AAACCAAAAGGCAGAATCAGTGTTACATTTGTGGTCAGATGAGCTAACGACATCCTTCCT	intergenic							14.1182	26.6719	3.1485	4.20596	5	22.5913	40.8184	16.0241	8.24963	5	5	10.2622	18.5232	27.43	5.88078	30.1349	41.6517	49.1414	13.9413	2.62964	3.44928	3.91793	3.59289	3.20325	2.57053	2.61568	3.20879	4.19394
ASHGA5P013224	0.00512034	-3.29787	down	noncoding	ENST00000391394	RP11-551L14.1	GENCODE	1058	chr12	-	31264592	31270405	ENST00000542490, uc001rjz.3	TACGAAAAAGAAGAATATGCCCTAGCTTTTTACCACATCAACAGTAGTTCAGTTTCCGAG	intergenic							51.2049	97.5067	4.54911	6.27064	5	121.76	130.877	72.5332	33.9769	9.98216	5	30.5102	111.253	104.492	53.4276	92.6382	106.855	119.542	94.3387	2.62964	5.70337	5.5944	5.61211	4.94274	4.77403	2.61568	4.52091	6.90817
ASHGA5P015382	0.00513849	-1.52978	down	noncoding	ENST00000419737	ASMTL-AS1	GENCODE	1756	chrX	+	1520813	1534319		TGTTTACAGACCACCAAGGCAGGAGAGATGGAAGCCGCCCAGAGAACTGCCACTCCATAG	natural antisense	NM_001173473	ASMTL	N-acetylserotonin O-methyltransferase-like protein isoform 2	-	1522031	1572655	7.61175	11.5362	2.68864	3.30197	5	13.6577	13.6429	5	5.76391	5	5	7.82947	9.88039	9.13181	6.90622	12.3097	7.43241	24.023	11.0701	2.62964	2.85086	2.77182	2.33704	2.83084	2.57053	2.61568	2.9027	3.37958
ASHGA5P058060	0.00550254	-2.96653	down	noncoding	TCONS_00025970	XLOC_012288	LincRNAs identified by Cabili et al	456	chr17	+	66179198	66182891		CGCTGCATCGTAAGGATGGAGGAGCTGTTGTCTCCACAGCTGACAGTTCTAGAAACTGAG	intergenic							27.7859	65.1498	3.97868	5.54745	6.13787	32.8485	56.368	71.2634	24.5981	5	5	21.0713	40.9875	56.6628	21.8808	58.0073	70.433	128.791	79.2859	4.30228	3.89311	4.33065	5.58968	4.49256	2.57053	2.61568	4.03492	5.40366
ASHGA5P027825	0.00558378	-6.42255	down	noncoding	ENST00000544591	RP11-291B21.2	GENCODE	868	chr12	+	10705961	10710648		AGGGAGGAATTTTCAGATTGACCAAAGAGTATTGGTCTACATCATTAGTACTTTCAGTGA	intergenic							108.673	245.623	4.76305	7.4462	5	181.515	332.207	308.276	12.2509	7.47063	5	17.6613	93.2751	227.792	74.8937	311.165	277.042	425.929	309.264	2.62964	6.28756	7.01487	7.75432	3.64435	4.34212	2.61568	3.81586	6.65951
ASHGA5P022045	0.00563383	-2.36965	down	noncoding	ENST00000547794	RP4-816N1.6	GENCODE	439	chr12	-	2914299	2921982		CAACTCTGATGATGCAGAGCTGGAAGAAACCTCAGGAATGCTTTCGATTTTGCAGATGAG	natural antisense	NM_002014	FKBP4	peptidyl-prolyl cis-trans isomerase FKBP4	+	2904107	2914587	23.5065	37.7317	3.60098	4.84565	5	38.953	63.4229	35.5773	12.6312	5	5	22.4672	31.6754	23.5338	18.9256	49.2713	53.0004	48.336	39.3794	2.62964	4.10499	4.49366	4.60355	3.6753	2.57053	2.61568	4.11448	5.00057
ASHGA5P054253	0.00597073	-5.40473	down	noncoding	NR_027285	FLVCR1-AS1	RefSeq	942	chr1	-	213029945	213031480		TTCATAAGTTCATGCTGTCCCAGCAGAGGAATAACGCCAGAAAGTGTTCCAGTACAACCA	bidirectional	NM_014053	FLVCR1	feline leukemia virus subgroup C receptor-related protein 1	+	213031596	213072705	87.1252	194.602	4.69826	7.13248	5	200.029	261.92	102.776	92.6991	5	5	24.5769	146.381	118.88	82.1292	325.641	375.085	193.28	120.819	2.62964	6.42691	6.65019	6.1174	6.34518	2.57053	2.61568	4.23056	7.29391
ASHGA5P046108	0.00604574	-1.91943	down	noncoding	TCONS_00001648	XLOC_000986	LincRNAs identified by Cabili et al	2136	chr1	-	120615907	120619716		TCACATTGTTGCACAAAGGTACAGTGGAGTGAGACTGAGTAAGAGGACAGAAATAGTGGG	intergenic							11.2065	21.0923	2.95614	3.89682	5	21.9162	28.8963	9.44035	7.24218	5	5	7.15655	12.7249	15.9094	5.10789	26.9828	28.8794	45.3301	12.7115	2.62964	3.41319	3.54491	3.00265	3.06594	2.57053	2.61568	2.80656	3.68465
ASHGA5P034342	0.0062782	-1.79913	down	noncoding	uc002qim.1	AL833150	UCSC_knowngene	1567	chr19	-	55551815	55553382		ATCAACACCCTGATAGTTCTCATTTTAACCACCTGTAAGTGCACATACAAGTCAACGGCA	intergenic							12.1468	18.4769	2.96347	3.81077	5	24.8751	31.8332	14.4921	5.97374	5	5	5	19.1479	13.0284	6.60065	32.1949	16.9338	29.5023	11.9304	2.62964	3.55879	3.6504	3.47921	2.86333	2.57053	2.61568	2.34018	4.24473
ASHGA5P049434	0.00635071	-2.20147	down	noncoding	ENST00000416689	RP5-848E13.3	GENCODE	3075	chr1	+	43424774	43442099		AAGCAGATGGTTAAGAGCTCTACAACTTCTGTGAGGTAAAGAATATCTGCAGGGCTGGAC	natural antisense	NM_006516	SLC2A1	solute carrier family 2, facilitated glucose transporter member 1	-	43391045	43424847	100.761	214.72	6.22952	7.36798	12.5312	232.648	112.725	95.5461	105.22	44.6051	16.7655	186.05	219.834	368.254	128.429	122.407	277.43	243.795	142.89	5.28224	6.65591	5.36317	6.00277	6.52225	6.94384	5.99681	7.06915	7.8761
ASHGA5P005776	0.00637623	-1.95332	down	noncoding	ENST00000309874	RP11-23P13.6	GENCODE	2900	chr15	+	42184990	42188133	ENST00000562920	ACCTAACCAGTAAGACCCTCAGCCCATGGAGTCCTGTGTGATGTTGTGAGCGTGGGAGGA	natural antisense	NM_016642	SPTBN5	spectrin beta chain, brain 4	-	42140343	42186275	61.2159	134.684	5.50056	6.46649	19.6704	106.857	156.846	81.3891	35.3307	13.6086	9.90664	66.1183	47.9167	96.1707	50.0621	281.202	187.435	216.722	63.2818	5.87485	5.50979	5.87414	5.77643	4.99522	5.22733	5.14863	5.59811	5.63473
ASHGA5P022983	0.006553	-1.65003	down	noncoding	ENST00000567090	AC009052.12	GENCODE	298	chr16	+	57494966	57496649		AAACTGCCTCACCTGAGACAAGTGCCTGCTGGACAGAGCAGGAGGCCGCAGAAGACGCTC	exon sense-overlapping	NM_020312	COQ9	ubiquinone biosynthesis protein COQ9, mitochondrial precursor	+	57481336	57495187	547.402	785.198	8.61288	9.33537	101.622	1022.65	1325.31	701.866	453.424	174.305	58.2642	541.777	936.168	936.817	396.988	827.9	981.029	798.638	618.844	7.82388	8.81605	9.18249	9.0139	8.67858	8.90602	7.84159	8.64048	9.75257
ASHGA5P015006	0.00663468	-1.83092	down	noncoding	ENST00000415611	AC005682.5	GENCODE	1021	chr7	+	22893874	22899106		AGTAGAGGAGTGGTGTTTCCAGTGAAATCTATGGCAAGATGGTTTGGGGTCACTATCTAC	intergenic							12.5726	20.0981	3.13113	4.00369	5	18.7681	21.5027	24.4566	11.747	5	5	9.10674	28.5426	18.7103	12.5424	25.2015	13.0169	29.01	13.663	2.62964	3.2356	3.23326	4.08857	3.59899	2.57053	2.61568	3.07673	4.85233
ASHGA5P038748	0.0066456	-2.33449	down	noncoding	TCONS_00016263	XLOC_007635	LincRNAs identified by Cabili et al	283	chr9	-	5308117	5311063		ATAACCTGAAAGGAAAGCATAAACATCTGGAGCAGTTCCAAAGGCATCTGGGGAGAGTCA	intergenic							56.4161	155.954	5.49836	6.72147	13.4307	113.325	103.558	107.925	35.0508	31.1506	12.197	34.6913	330.219	109.208	75.8473	299.405	109.611	77.7967	89.5913	5.37959	5.5937	5.23827	6.18498	4.98393	6.42605	5.4924	4.68798	8.43228
ASHGA5P022791	0.00690016	-1.91486	down	noncoding	ENST00000562869	RP11-10O17.3	GENCODE	361	chr15	+	74781942	74809300		GTTGATGCAGATACATCAGACAGATGGTATACATCTCTTCGTGACTCAATCTGCTGAACG	intergenic							13.6099	24.2999	3.21624	4.15348	5	21.8672	26.2089	16.8301	16.4434	5	5	12.5293	20.2343	28.95	8.44671	19.5065	45.8886	20.0496	27.0238	2.62964	3.41021	3.44556	3.64813	3.97698	2.57053	2.61568	3.4332	4.32608
ASHGA5P027473	0.00718805	-2.15492	down	noncoding	ENST00000424517	RP4-717I23.3	GENCODE	262	chr1	-	93730232	93790207	ENST00000415150, ENST00000427669, ENST00000429859, ENST00000446528, ENST00000447577, ENST00000450843, ENST00000451302, ENST00000455474, ENST00000457025	CTGTCCTGCTGATGAAGTCTACGTTCATTCAGGGCCTGCTGTGGAAGACCAGCCCCAAAG	natural antisense	NM_206886	CCDC18	coiled-coil domain-containing protein 18	+	93646280	93744287	404.7	728.083	8.04335	9.15098	55.5341	981.967	1133.5	444.85	224.269	125.126	59.9485	212.405	967.767	717.039	289.479	507.973	1129.28	805.725	679.321	7.11316	8.75943	8.95647	8.29102	7.63525	8.45251	7.8815	7.25747	9.78388
ASHGA5P030559	0.00723992	-3.28565	down	noncoding	uc010ugt.1	LOC283663	UCSC_knowngene	2536	chr15	+	57592562	57599965	NR_024433	TCATTTAACCCCAAAATCAGTGATTCTACATCTCAAGCTCATATTTTGAAGTGTTTACGG	intergenic							32.1397	70.9527	3.77544	5.49162	5	44.6064	114.905	50.4805	12.7384	5	5	19.3879	33.7793	33.5989	26.3153	54.4888	178.229	127.554	42.7033	2.62964	4.28961	5.3914	5.09106	3.68564	2.57053	2.61568	3.92998	5.09911
ASHGA5P031005	0.00729357	-3.08161	down	noncoding	ENST00000561762	CTA-363E6.6	GENCODE	633	chr16	-	19488237	19499221		TGAAAAGCATAATCATTTGGATAAAGGGCAGCAGGGGGCAGAAGAAGATGCCAATCCTGT	natural antisense	NM_001105248	TMC5	transmembrane channel-like protein 5 isoform a	+	19422056	19510434	745.852	1419.01	8.56174	10.1854	40.6089	1686.29	1591.86	883.163	532.081	87.2219	27.8608	1117.73	827.071	2768.7	1035.32	1421.65	1922.61	1158.49	799.216	6.76265	9.52875	9.46508	9.37124	8.91283	7.90421	6.76946	9.77975	9.58624
ASHGA5P032900	0.00803833	-2.48201	down	noncoding	TCONS_00016076	XLOC_007467	LincRNAs identified by Cabili et al	216	chr9	+	97075821	97076871		TATGAATGCTCACACAGAAGCTCTCATTCCTGAGGAATGCAGGGAAAAGCAGAAGATGGA	intergenic							92.193	168.777	5.72965	7.04116	6.40872	118.638	241.633	132.752	84.0582	19.3323	6.11694	128.605	214.342	122.561	90.9678	155.277	211.705	248.541	138.047	4.36104	5.6656	6.5381	6.48979	6.20651	5.73801	4.29963	6.53851	7.83675
ASHGA5P027814	0.00807489	-4.55995	down	noncoding	NR_036466	LOC100499405	RefSeq	2469	chr12	+	9392598	9395645		GGTCATACGCTCAGGGAATGTTTATTATTGGAACAATTTAACCTACCAGCTTGTTATTTT	intergenic							59.0506	153.802	4.45845	6.64747	5	92.6068	181.392	85.9733	52.1132	5	5	45.3197	157.365	73.1292	35.0927	186.059	164.211	376.745	84.0091	2.62964	5.31923	6.09452	5.85338	5.52615	2.57053	2.61568	5.05849	7.40378
ASHGA5P028200	0.00807689	-2.07781	down	noncoding	NR_028138	LOC338758	RefSeq	2998	chr12	+	90102731	90105729		TTAGACCTAACTTATCCCATGTGTTTAACTGATCTAGAGATGTATCTTTGCATAAGGAAC	natural antisense	ENST00000551310	ATP2B1	ATPase, Ca++ transporting, plasma membrane 1 [Source:HGNC Symbol;Acc:814]	-	90049359	90103077	9.71198	20.7972	2.87355	3.92862	5	12.6525	24.4999	11.8241	6.79144	5	5	6.92794	53.4418	13.5269	7.31823	16.9712	15.8491	22.1952	16.278	2.62964	2.77502	3.37551	3.24972	2.99737	2.57053	2.61568	2.77494	5.81752
ASHGA5P040045	0.00820737	-1.64495	down	noncoding	NR_002799	LOC256880	RefSeq	1985	chr4	+	100871635	100873620		AGATAATACTCTGCCAGCTCTTTGCTATGAAGCCCCATAAAGGGAATTTACTGTTGCCTC	bidirectional	NM_002106	H2AFZ	histone H2A.Z	-	100869243	100871512	11.293	17.3739	2.98877	3.70681	5	15.3816	29.1602	12.1927	5.30963	5	5	13.3001	10.648	24.7297	5.17278	18.9826	22.096	28.1997	11.7882	2.62964	2.99162	3.55406	3.28852	2.75904	2.57053	2.61568	3.50105	3.46294
ASHGA5P030380	0.00853346	-1.89618	down	noncoding	ENST00000557523	RP11-1084I9.3	GENCODE	605	chr15	+	26361057	26361819		CAGTTAAGAGCAAAAGGCAATGGACCAAACTACATCAAAGATGGGATTATAACAAAACTT	intergenic							6.92765	15.0517	2.63044	3.55354	5	5	10.4846	5	5	5	5	14.9366	22.475	16.3226	5.23125	5	24.4736	20.1511	11.7083	2.62964	2.32168	2.57801	2.33704	2.3654	2.57053	2.61568	3.62554	4.48248
ASHGA5P027232	0.00856538	-2.79536	down	noncoding	TCONS_00011705	XLOC_005183	LincRNAs identified by Cabili et al	489	chr6	+	14661587	14662657		TTGAAGAGTTAAGAGACTCTGAATAATTGGCAGGGGAAGCTGGGATGGAGAACAAAGTAG	intergenic							9.74247	38.9564	3.04294	4.52597	5	8.07298	16.3878	14.2416	5	6.02491	5	18.2124	24.5772	28.8772	5	34.1984	82.9763	74.6732	22.3926	2.62964	2.44881	2.94708	3.45952	2.3654	4.02267	2.61568	3.85469	4.61584
ASHGA5P022504	0.00877913	-1.75989	down	noncoding	ENST00000558140	RP11-219B17.1	GENCODE	869	chr15	+	60771418	60822088		CTAACACTTATCAACAGAGCAGAGGAACAGAGCCACAGATAACTGAAAACCACTTTGGCA	natural antisense	NM_002943	RORA	nuclear receptor ROR-alpha isoform c	-	60780482	60919729	7.24214	14.274	2.67457	3.49005	5	6.89709	11.5028	10.2475	5	5	5	9.28967	12.4011	8.18193	6.64367	11.0681	15.3615	36.6135	9.64848	2.62964	2.39166	2.63621	3.08712	2.3654	2.57053	2.61568	3.10029	3.6489
ASHGA5P043995	0.00924455	-2.7612	down	noncoding	ENST00000461471	OR2A9P	GENCODE	2913	chr7	+	143995111	143998024	ENST00000479887, uc003wed.3	GCTGAAGTCAGCTACACTTTTTCTATTTGAAAAACAATTTCTTGCATTTGGGATTTCAGG	intergenic							22.3279	60.1608	3.79377	5.25906	5	25.4739	38.8637	48.4004	21.2347	5.34103	5	29.3094	109.745	47.4826	10.2985	113.673	60.3353	57.7031	21.8881	2.62964	3.58415	3.86353	5.03236	4.30826	3.84731	2.61568	4.4692	6.89035
ASHGA5P029902	0.00952334	-3.68537	down	noncoding	TCONS_00008203	XLOC_003657	LincRNAs identified by Cabili et al	1405	chr4	+	117274142	117276371		CTCTAGCATTGTTCTGTGTTTTGAATATAATTATCCTGTGTACATTGATCTTGCAAGCTG	intergenic							68.9408	242.222	5.62453	7.50634	5	86.4094	90.5872	104.589	108.383	63.6777	18.8791	74.001	402.864	180.494	120.185	147.88	308.171	343.272	192.689	2.62964	5.22322	5.03564	6.1427	6.57444	7.46066	6.17086	5.7591	8.70424
ASHGA5P043628	0.00968826	-4.9471	down	noncoding	NR_040085	LOC100506776	RefSeq	3516	chr7	+	38381177	38418238		TGAATTACCTTTCATGTCCTCTAAACATACCAACAAGGAGGCTGGAGTTAGGACTTATGT	intergenic							105.411	253.53	5.19265	7.49923	5	136.32	260.911	228.029	132.371	5.68032	5	69.9798	160.818	221.334	78.8373	306.232	321.375	531.318	154.798	2.62964	5.87004	6.64544	7.28842	6.87313	3.9367	2.61568	5.68214	7.44096
ASHGA5P027414	0.00972515	-1.94504	down	noncoding	NR_038930	LOC100507250	RefSeq	1737	chr12	-	69068150	69080639	ENST00000500695	ACACCACAAGATTATGATGATAGAGACATCATTTGAAGTGGTAGAGAGTACTGTGAAATA	natural antisense	ENST00000229179	NUP107	nucleoporin 107kDa [Source:HGNC Symbol;Acc:29914]	+	69080513	69136785	12.4991	23.7181	3.22386	4.18366	5	9.42096	31.9363	21.3622	6.27749	5.35906	5	15.637	29.7902	17.9915	8.91257	24.8722	24.7301	42.1299	17.5999	2.62964	2.53407	3.65382	3.91533	2.91195	3.85239	2.61568	3.67803	4.9153
ASHGA5P026999	0.00972738	-2.08396	down	noncoding	ENST00000417058	CD27-AS1	GENCODE	1504	chr12	-	6548323	6556939		GCCGCTGTCAAGAGAAAAGCATCTATTACAGTTACATTTTTAAGTTAAGTAGACTGAAGA	intronic antisense	NM_001242	CD27	CD27 antigen precursor	+	6554050	6560884	9.14767	23.6815	3.05984	4.11916	5	14.6349	16.6534	7.0507	9.52984	7.59564	5	7.71685	51.6544	20.526	16.0667	22.4473	27.3891	17.8211	9.86628	2.62964	2.93103	2.96672	2.71741	3.36036	4.37233	2.61568	2.88552	5.7643
ASHGA5P046256	0.00974309	-2.1609	down	noncoding	ENST00000456301	RP3-341D10.4	GENCODE	3216	chrX	-	100258820	100262962		GAGAAAGTTCTTCCCTTTTGGTCCTATTTACATTCTGTTTCCTCAGCTTGGAATATTCTT	intergenic							129.942	226.208	6.30825	7.41989	7.54003	221.764	374.884	202.777	72.0051	28.4948	22.0497	110.022	229.699	254.617	87.0431	249.059	273.502	363.709	125.829	4.59052	6.58375	7.19288	7.10848	5.97701	6.29776	6.40379	6.31184	7.94083
ASHGA5P043739	0.00977631	-2.9537	down	noncoding	uc010lcn.3	BC047594	UCSC_knowngene	2055	chr7	+	74912421	74918383	NM_001099435, NM_001146210, NM_175064, NR_003664, uc010lba.3, uc010lch.3, uc010lco.3, uc022agc.1	ATCTATTATTACACGTGCTGCTGAAGGGAGCATGGTTTTTATCTATGATACTTAGTTAAC	intergenic							29.6468	63.252	3.89085	5.45337	5	50.3874	35.4818	33.7996	32.5384	5	5	69.9671	37.6628	52.0755	21.0641	81.4905	71.4239	139.07	39.9767	2.62964	4.46072	3.76174	4.5273	4.8798	2.57053	2.61568	5.68135	5.27281
ASHGA5P037716	0.00977908	-2.93681	down	noncoding	ENST00000566575	CTA-250D10.23	GENCODE	1078	chr22	-	42318026	42319104		GTAAGTTTCTCTCTCTTTAGAGACTCCACAATAAAGTTTTCAACATGGTAAGGTTTTCCA	intergenic							672.605	1755.83	8.94573	10.5	45.8974	811.936	900.817	1328.54	332.549	1080.1	151.162	729.841	2768.77	1357.5	895.026	1526.17	1930.07	1725.87	2087.4	6.88658	8.47184	8.56338	9.98054	8.24928	11.145	9.14562	9.12355	11.0822
ASHGA5P041135	0.0099536	-2.71303	down	noncoding	ENST00000512319	RP11-974F13.6	GENCODE	689	chr5	+	69274356	69293139	ENST00000513644	ATAATGCTGGATCTAAAGGCATCATCTGAAGAAGACAAAGATATCAACAATCGCAACTAT	intergenic							22.4029	47.9893	3.57587	5.01578	5	23.7703	62.21	39.8005	16.5632	5	5	21.8788	46.419	36.5134	9.04604	37.7403	69.9779	101.293	34.9354	2.62964	3.50551	4.46546	4.75541	3.98517	2.57053	2.61568	4.07956	5.58881
ASHGA5P039550	0.00998522	-2.10641	down	noncoding	ENST00000562919	RP11-73K9.2	GENCODE	2036	chr4	-	113150716	113152752		CCAAGAGCCAGAAACAAACTAAATGCTCAAAAATTGAAGGATGATTAAATTTGCTGGTGT	bidirectional	NM_001128426	AP1AR	AP-1 complex-associated regulatory protein isoform b	+	113152894	113191211	17.1982	28.1587	3.34363	4.41842	5	25.5195	35.5994	26.2024	6.58947	5	5	28.6752	33.286	22.2015	10.8814	30.9384	29.3281	49.2395	21.2357	2.62964	3.58717	3.76453	4.1771	2.96583	2.57053	2.61568	4.43857	5.07667
ASHGA5P022486	0.0100071	-1.97266	down	noncoding	ENST00000557871	RP11-56B16.2	pseudogene	1041	chr15	-	52211269	52222824		TAATGATGAAAGGTAAACCTTCCAGAAAGAGGAAAGCAGAGCATGAAGAGGAAGAAGATG								11.5659	20.2201	2.99397	3.97411	5	18.4467	20.7999	26.2299	6.76291	5	5	5.28753	29.8155	13.3748	8.58434	16.6185	20.0795	38.5587	14.5095	2.62964	3.2148	3.19766	4.17923	2.9923	2.57053	2.61568	2.55192	4.91608
ASHGA5P041332	0.0100675	-2.43449	down	noncoding	ENST00000565823	CTB-36H16.2	GENCODE	2178	chr5	+	122168050	122170228		ACTGAAGCCAGTCAAGGTGAATACACAGAAAATCATTTTCTTATTAAGGTCAGTTAATGG	intergenic							67.493	148.97	5.52738	6.811	5.94149	81.5267	137.13	118.447	42.2296	36.8753	7.23593	110.558	214.563	101.828	57.0643	153.671	152.046	227.308	136.308	4.25619	5.13606	5.6643	6.31431	5.25032	6.66999	4.60664	6.3212	7.84159
ASHGA5P021544	0.0101792	-2.02157	down	noncoding	ENST00000534540	MIR210HG	GENCODE	367	chr11	-	567525	568369	NR_038262	GGGATCCCAGGGTACCAGTGTGCGGAGTTCCTGTTGCCAAGCTGAAGGTGGCCCTGGGCA	intergenic							19.447	29.4555	3.4428	4.45827	5	29.0105	45.0852	21.1542	8.95957	5	5	36.3664	37.3503	37.4806	12.1361	38.3485	35.6008	28.2028	17.0694	2.62964	3.73743	4.0374	3.9038	3.29503	2.57053	2.61568	4.75285	5.25875
ASHGA5P035987	0.010257	-2.40319	down	noncoding	uc002std.1	BC046476	UCSC_knowngene	1324	chr2	+	88927346	88931337		CTGCTGCTAAGCAAAATGAGGATTCTGCTAGTGAGGATGAAAGGAAGAATGTGTAATCAG	bidirectional	NM_004836	EIF2AK3	eukaryotic translation initiation factor 2-alpha kinase 3 precursor	-	88856258	88927094	26.9298	62.1064	4.26393	5.52888	5	30.2635	56.1617	60.6437	16.8616	12.2251	7.09695	27.1857	73.4262	37.4656	24.2143	55.74	78.8684	104.417	60.6138	2.62964	3.78993	4.32557	5.35351	4.00593	5.07612	4.56934	4.36144	6.2934
ASHGA5P018694	0.0103623	-2.94795	down	noncoding	ENST00000456563	RP11-706O15.3	GENCODE	793	chrX	-	3772389	3785176	ENST00000457936	AGAGTCAGCACGCGGTGGCCTGGGTGAACTGTCACCCCTACAACTCAGCTTGCAACCAGC	intergenic							54.8961	99.1394	4.63758	6.19729	8.64622	95.0721	169.745	72.9039	39.3905	5	5	43.411	59.6273	100.366	39.9338	137.07	148.262	136.604	72.1133	4.78878	5.35506	5.99776	5.6196	5.15513	2.57053	2.61568	4.99809	5.9822
ASHGA5P030242	0.0106909	-2.82079	down	noncoding	uc002bmo.1	AX746605	UCSC_knowngene	3416	chr15	-	89045148	89048564		TGGGGGTTACAAAGTTTGAAATCTGTCTTAAGGAGGGATGTATTACTCAAAATAAATTGC	intergenic							32.48	60.3341	3.83	5.3261	5	52.0696	112.918	39.8103	19.1637	5	5	20.8786	52.8336	61.9815	11.8882	70.3676	111.838	86.6674	26.7629	2.62964	4.50757	5.36643	4.75649	4.17234	2.57053	2.61568	4.0213	5.80066
ASHGA5P045134	0.0107701	-4.43999	down	noncoding	uc003zlo.1	AK021570	UCSC_knowngene	2410	chr9	-	15163621	15166031		CCGTAGTATCACAGAATATGCTGCATTTAGATACAGGTTTAATTTGCCAGATTTTCTCAA	intergenic							183.167	513.131	6.38367	8.53423	5	284.103	499.9	287.344	119.869	53.3226	9.43536	206.363	933.844	279.256	164.415	453.111	638.146	707.285	415.861	2.62964	6.95561	7.62857	7.63771	6.72779	7.20651	5.06757	7.21597	9.74804
ASHGA5P040184	0.0108289	-1.7651	down	noncoding	BE048608		LincRNAs identified by Khalil et al	282	chr13	+	49130167	49130440		CAGCCAGCATCCAGTTGTTTGAACTGCCTCTATACTAGTAAACAAGTAATTAATTAATAC	intergenic							7.59903	13.0382	2.65413	3.47388	5	5	17.9511	12.8411	5	5	5	5	23.4468	11.1477	9.44112	5	12.4862	17.4765	12.2694	2.62964	2.32168	3.04405	3.34585	2.3654	2.57053	2.61568	2.34018	4.54589
ASHGA5P041757	0.01094	-3.82076	down	noncoding	ENST00000419357	LINC00243	GENCODE	264	chr6	-	30766430	30798436		CTTCAACTGAAATCAGATCTTCTTAAAGAAATGCTTGGCTCTCAGACTGGGAACGGAAAT	intergenic							51.2367	116.96	4.38502	6.31888	5	73.955	129.344	72.9555	43.3252	5	5	75.3139	48.9845	67.0722	83.8549	134.509	97.7862	310.533	75.9763	2.62964	4.99986	5.57604	5.62119	5.28384	2.57053	2.61568	5.78338	5.67132
ASHGA5P018820	0.0111883	-2.25428	down	noncoding	ENST00000457976	RP11-305L7.3	GENCODE	506	chr9	-	93881419	93925369		GGACTTGGAGATCAAAGAAACTCTAGTAACGTGGAAATTCATGCTCCGAGTAGTGACAAG	intergenic							10.6786	28.4876	2.94998	4.12265	5	18.6732	18.3284	20.8072	6.08987	5	5	6.53011	9.64169	25.7524	5	55.4352	27.9187	55.4872	20.178	2.62964	3.22952	3.06631	3.88593	2.88335	2.57053	2.61568	2.7189	3.35278
ASHGA5P058622	0.0112333	-2.40894	down	noncoding	uc011crl.1	SMA4	UCSC_knowngene	5137	chr5	+	69199602	69770097		GAAGCTTAAGACTTGCTATAATTCTGTGAGAGAGCTATAAAAGTCTGCTCAGAAACATTA	intron sense-overlapping	NM_000344	SMN1	survival motor neuron protein isoform d	+	69345349	69373418	14.5587	35.0698	3.11563	4.38403	5	13.1304	49.9762	20.9542	6.60463	5	5	10.8043	10.5207	30.4869	6.3291	34.4562	70.964	76.761	15.9703	2.62964	2.81224	4.16552	3.89311	2.96831	2.57053	2.61568	3.27003	3.45056
ASHGA5P020759	0.0112594	-2.84749	down	noncoding	NR_033193	ZFAND1	RefSeq	2212	chr8	-	82613565	82633539		CACTAACTTGACAGAAAGAATTTACTTTCAGGTTTTCTTACCTAAAGGGAGCAAAGAGAA	exon sense-overlapping	NM_001170796	ZFAND1	AN1-type zinc finger protein 1 isoform b	-	82613565	82633539	43.8217	84.8144	4.33611	5.8458	5	76.5362	132.56	64.5217	31.4212	6.05955	5	29.4742	34.5034	73.395	23.3033	120.513	148.649	122.429	70.9082	2.62964	5.04749	5.61262	5.44326	4.83	4.03274	2.61568	4.47745	5.13353
ASHGA5P037632	0.0112741	-3.92033	down	noncoding	ENST00000564772	CTA-445C9.15	GENCODE	3054	chr22	-	26917948	26921002		GCAGCATGCATCATTCATTCTGATTCCTTAATTTGCCATATGTGAAAACATGGTAATCTA	intergenic							67.486	126.442	4.48353	6.4545	5	231.492	128.419	72.6812	27.733	5	5	64.5626	55.8952	114.98	55.5132	149.919	229.706	221.486	57.5912	2.62964	6.65019	5.56606	5.61419	4.65901	2.57053	2.61568	5.5629	5.88295
ASHGA5P056924	0.01129	-1.72608	down	noncoding	TCONS_00010585	XLOC_005110	LincRNAs identified by Cabili et al	2306	chr5	-	180253954	180259036		CAACTTTCAGTGGCTTAGACAGTGGCCTAACTAGAAGACCAAGGCTCAAAGGAACACATT	intergenic							13.1507	17.6003	3.00443	3.79192	5	29.0395	31.3558	18.0124	5	5	5	6.7977	15.8216	11.3342	8.69591	19.2016	27.3343	27.3737	13.441	2.62964	3.73863	3.63523	3.72431	2.3654	2.57053	2.61568	2.756	3.96849
ASHGA5P044895	0.011291	-2.80054	down	noncoding	ENST00000569134	RP11-48B3.4	GENCODE	1805	chr8	+	81453534	81455339		CTGCCCTGAAAGGGGCTGAAATGAAGCCATTAAGACCGAAGTGTACTTTTTAAAACTCCA	intergenic							31.3902	55.5219	3.88246	5.36817	5	39.0878	86.8832	57.9867	29.4615	5	5	22.7024	66.7831	39.8057	18.8392	57.4625	58.781	94.9902	51.9914	2.62964	4.11063	4.97302	5.29232	4.74085	2.57053	2.61568	4.12704	6.15119
ASHGA5P053697	0.0112929	-2.58874	down	noncoding	ENST00000377614	RP11-111F5.5	GENCODE	1890	chr9	+	46687461	46746500	ENST00000454645, NM_002009, NR_047527	CCACAAATAATCATGCTTTTTTCCTATGGTTACAGCATTAAACTATATTTTAAGTTGTTT	intergenic							22.5747	55.1602	3.91065	5.28291	5	41.8988	33.8309	39.3755	17.0101	11.797	5	26.6854	90.0386	46.504	12.4358	67.6936	44.3579	83.9989	41.0926	2.62964	4.20372	3.7108	4.74031	4.01785	5.02791	2.61568	4.3393	6.60887
ASHGA5P040905	0.0113185	-1.85365	down	noncoding	ENST00000515739	RP11-1026M7.3	GENCODE	684	chr5	-	177228204	177230345		CAAAATATTTTAACCTTAGAATTTAAATAAATGTGTATATTCTCTACAAGTTAAACACAA	intergenic							6.84206	14.2676	2.59069	3.48106	5	9.20496	9.48283	11.0487	5	5	5	5	29.6756	6.37592	9.63246	18.0877	6.10382	22.8922	7.10559	2.62964	2.51792	2.51355	3.17261	2.3654	2.57053	2.61568	2.34018	4.90825
ASHGA5P057464	0.0114174	-2.14299	down	noncoding	TCONS_00018107	XLOC_008370	LincRNAs identified by Cabili et al	327	chr10	+	6632916	6657810		GACGGATAACAGGAAAGAATATTGATTGAACATCTACTCAAGAACTGCAAAACAGAGATT	intergenic							20.7695	32.3777	3.43104	4.53067	5	20.632	70.5818	31.1729	8.46914	5	5	20.3005	32.2614	30.5965	8.46954	43.2979	53.7226	39.1763	19.1199	2.62964	3.34458	4.65266	4.41341	3.23414	2.57053	2.61568	3.98767	5.02676
ASHGA5P038730	0.0114496	-2.16017	down	noncoding	uc001djh.1	BC037304	UCSC_knowngene	2715	chr1	+	84543635	84546350		CATTTGGAGCAGTGTTATCAGGTATATGTTGCTGTTCTGTAGTGAACAAAGAAATTGTAT	exon sense-overlapping	NM_002731	PRKACB	cAMP-dependent protein kinase catalytic subunit beta isoform 2	+	84543744	84704181	7.041	23.9678	2.65857	3.76971	5	7.0761	11.8257	11.7684	5.6578	5	5	5	24.7154	5.18352	14.1116	88.9503	12.8485	16.063	5.90247	2.62964	2.39829	2.65506	3.24432	2.81482	2.57053	2.61568	2.34018	4.62443
ASHGA5P036396	0.0116429	-2.17952	down	noncoding	TCONS_00026334	XLOC_012681	LincRNAs identified by Cabili et al	1040	chr18	+	52559874	52562337	NM_004163	TCTGTCTCTTCACCAGTGGAGTGAGTGCAGCAGTTAGAAAGAGAAGCAATATTGTGCAAC	exon sense-overlapping	NM_004163	RAB27B	ras-related protein Rab-27B	+	52495707	52562747	21.1406	35.5003	3.60993	4.73394	5	40.57	29.3804	28.8514	25.2695	5	5	30.0537	22.316	33.4655	16.0654	33.5907	57.7657	49.5286	35.7702	2.62964	4.16197	3.56272	4.309	4.53081	2.57053	2.61568	4.49911	4.47144
ASHGA5P057402	0.0116728	-2.96017	down	noncoding	TCONS_00016844	XLOC_007801	LincRNAs identified by Cabili et al	2128	chr9	-	100660034	100664123		TATAAACCTAGGTTCCAGCAGATGCAATTCACAGAAGGTTCAAGGTTTAGGCCAGTGCAC	intergenic							22.914	61.9311	3.58448	5.15016	5	42.0073	53.3338	42.1935	14.7476	5	5	16.0301	17.3065	19.5403	12.227	89.0915	146.433	82.5079	66.4122	2.62964	4.20734	4.25285	4.84077	3.85192	2.57053	2.61568	3.70713	4.094
ASHGA5P035408	0.0119455	-2.27152	down	noncoding	NR_045786	LOC100861402	RefSeq	2992	chr2	-	169628460	169642939	NR_045787	GAATTGTCTTAAGAAAACAAGTAAGGTTTTGTCACCTATCCTATTTCTCACTGCAAGTTG	natural antisense	NM_001256126	CERS6	ceramide synthase 6 isoform 1	+	169312758	169631644	26.0114	45.3766	3.9278	5.11146	5	28.5141	65.5439	44.6355	17.5398	7.01689	5	34.841	66.6766	27.5635	23.5947	48.2326	65.8762	48.4168	37.2757	2.62964	3.71771	4.54452	4.92204	4.05664	4.24261	2.61568	4.69358	6.14878
ASHGA5P000021	0.011965	-2.13496	down	noncoding	AI767017		LincRNAs identified by Khalil et al	415	chr4	-	56782130	56814048		CAAAAGATAGAATCTATCAAGCTACAAATGGCTATGTTGCCTGAAGCCCCAGACATCATC	intergenic							21.1603	37.9586	3.56386	4.65807	5	37.2046	46.8343	30.1983	21.718	5	5	18.3274	16.1612	26.7384	16.0175	50.5268	93.5888	36.9642	25.7132	2.62964	4.04403	4.08355	4.36957	4.33599	2.57053	2.61568	3.86186	3.99375
ASHGA5P016462	0.012077	-2.14236	down	noncoding	ENST00000457661	AC093415.2	GENCODE	494	chr3	-	37850202	37903271	ENST00000430620	GGGCCGACACAGGGTTCCTGACCAAGCTGGTGCTTCTGCGTGTGTTCCTGCATGACTTGG	intronic antisense	NM_002207	ITGA9	integrin alpha-9 precursor	+	37493812	37861281	17.941	35.821	3.64573	4.74493	7.24944	37.2477	31.4001	22.0254	12.3346	5	5	23.2703	63.943	39.0352	13.5406	26.1771	42.5383	32.9913	32.5214	4.53547	4.04574	3.63654	3.95212	3.65193	2.57053	2.61568	4.15782	6.09154
ASHGA5P047287	0.0120994	-1.60295	down	noncoding	NR_038921	LOC100130992	RefSeq	6477	chr10	+	22541000	22547477		CAAGGTGTAATGGAAAACATGAATTAATTAGAGATTTCGGGTACGAACGTGACATGAATG	intergenic							7.18493	11.7914	2.68027	3.361	5	11.3591	7.34918	12.854	5.91723	5	5	5	13.1607	7.01372	15.3662	11.396	7.81841	17.7954	9.98951	2.62964	2.67649	2.40825	3.34752	2.85387	2.57053	2.61568	2.34018	3.726
ASHGA5P014966	0.0125832	-3.63953	down	noncoding	uc010vdn.2	RRN3P2	UCSC_knowngene	2314	chr16	+	29086162	29128038	uc002dsg.4	CACAGAGCCTTGCAAATAATAGCAAGATATGTACCATTGAATGTTACGTTCATAACTTAC	intergenic							69.4746	142.375	4.87234	6.73609	5	91.0641	184.897	152.386	29.6429	12.3684	5	75.4387	254.201	106.856	70.355	119.398	129.414	217.368	99.035	2.62964	5.29569	6.12381	6.68818	4.75004	5.09036	2.61568	5.78533	8.08498
ASHGA5P022913	0.0126869	-3.48022	down	noncoding	ENST00000565292	EMR4P	pseudogene	1430	chr19	-	6954682	6988871		TAAGAGGTACCCTATCACTTATCAATCTCTTGGGGATATTCTGAATGCATCCTTTTTTAG								44.2313	91.7577	4.14242	5.9416	5	62.4297	155.771	55.8612	36.1986	5	5	28.5897	82.4821	85.3751	11.3903	144.673	104.296	95.773	118.315	2.62964	4.76297	5.86087	5.23603	5.02935	2.57053	2.61568	4.43427	6.47838
ASHGA5P054314	0.0127951	-2.32928	down	noncoding	ENST00000428176	CHRM3-AS2	GENCODE	789	chr1	-	239869621	239870822		CTTACATAGATGTTAACCAAAGTCTGTAAGGTTCGTTCATTTGTCCACAGTTACCCAGAA	intronic antisense	NM_000740	CHRM3	muscarinic acetylcholine receptor M3	+	239792372	240072717	22.7402	40.9499	3.64543	4.86531	5	22.4985	71.3478	47.2613	6.47305	5.88981	5	18.4514	26.1218	39.9205	11.3386	37.0923	74.0879	48.4463	49.6416	2.62964	3.44481	4.66916	5.00218	2.94597	3.98702	2.61568	3.86899	4.70761
ASHGA5P056832	0.0128331	-1.98343	down	noncoding	TCONS_00009180	XLOC_004195	LincRNAs identified by Cabili et al	544	chr4	-	183795491	183798859		GCGAGATGATATGCACTGTTCGTTTACGGCGGCAAGAGAGCTCAATTAATTTCTGAGGGA	intergenic							18.2844	27.1369	3.35845	4.34645	5	17.5945	58.1235	29.449	14.6061	5	5	11.5016	31.3257	21.3781	11.5262	33.4247	34.0346	43.7634	14.5057	2.62964	3.15631	4.37502	4.33904	3.84149	2.57053	2.61568	3.33991	4.98418
ASHGA5P032055	0.0131179	-2.97153	down	noncoding	ENST00000570809	RP11-676J12.4	GENCODE	1755	chr17	-	666804	668559		CTCAGCGTGTCCATAACTTATCTTACCTCAAATCCATTCTTCTTCCAGTAATATTACATA	intron sense-overlapping	NM_016080	GLOD4	glyoxalase domain-containing protein 4	-	662548	685571	57.412	91.7584	4.57684	6.14805	5	114.161	155.023	95.1927	39.0507	5.42416	5	40.4444	90.4184	72.8327	43.2922	128.686	109.452	119.721	77.9067	2.62964	5.6039	5.85446	5.99618	5.1442	3.87115	2.61568	4.8995	6.61344
ASHGA5P036234	0.01315	-2.25368	down	noncoding	ENST00000416361	AC068039.4	GENCODE	2102	chr2	+	172629991	172632354		CAATGAAGAGTTCCTTCTCAGTTTCTAGCATATGATGATTAGAAAAGAGTTCTTAAAAAA	intergenic							29.5158	57.2083	4.18881	5.36109	5	52.7789	56.6319	48.3446	16.3862	5.71564	5.08222	46.1868	77.9688	70.3939	16.6793	37.0817	85.0454	74.2013	39.0873	2.62964	4.5273	4.33765	5.0305	3.97247	3.94534	3.98022	5.08734	6.38927
ASHGA5P031556	0.0131804	-2.31727	down	noncoding	ENST00000566734	RP11-1021N1.2	GENCODE	549	chr16	+	15506576	15507125		GATTTTGATGTTGCATTTGGCTACATTTAATCCACTTTCACCCATAAGGTTTAGCATCTA	intron sense-overlapping	ENST00000568766	RP11-1021N1.1	Uncharacterized protein [Source:UniProtKB/TrEMBL;Acc:H3BMD7]	+	15489610	15609205	17.1355	36.1052	3.37195	4.58437	5	19.7246	42.1637	20.3778	27.7899	5	5	12.0282	65.2106	26.7604	7.92375	41.019	64.9486	30.1821	16.6923	2.62964	3.29503	3.95016	3.86542	4.66104	2.57053	2.61568	3.38807	6.11962
ASHGA5P044890	0.0132064	-1.78703	down	noncoding	ENST00000565862	RP11-594N15.3	GENCODE	3754	chr8	+	79518186	79521940		GATGGTGTGACTATTATGACTGTCCTGTTGAATTTCTAAGTTTTCTTTTATCCCATATCC	intergenic							13.2716	20.1237	3.12146	3.95903	5	31.4156	27.0497	12.3721	7.01374	5	5	13.3217	34.993	10.405	13.3248	29.7661	17.4374	17.9637	16.976	2.62964	3.8362	3.47616	3.30725	3.03318	2.57053	2.61568	3.50305	5.15419
ASHGA5P039205	0.0133257	-2.51248	down	noncoding	ENST00000561748	RP4-575N6.5	GENCODE	592	chr1	+	101708713	101709305		TAAATACCTTGAGGGAGGAATCACAAATAACTAAAAGAAACTTTTGTAGAGACTATCAGA	intergenic							41.6276	94.2447	4.801	6.13011	5	54.0025	116.205	61.1051	30.4537	22.3341	9.19927	34.721	166.425	63.0963	37.1195	92.7163	110.617	113.424	76.3151	2.62964	4.55738	5.40846	5.36478	4.7869	5.9469	5.02474	4.68919	7.48872
ASHGA5P031047	0.0133274	-2.50668	down	noncoding	ENST00000567108	CTD-3203P2.1	GENCODE	1684	chr16	-	27224630	27226314		AGACAACGTTTGTTATTATTACTGCTACTATTACTATTTGCTCCTCATGAGATCAAGGTG	natural antisense	NM_001145348	KDM8	lysine-specific demethylase 8 isoform 1	+	27215295	27233089	53.9536	96.8742	4.84287	6.16865	5	122.11	141.121	75.6388	37.8526	12.4347	6.05288	31.419	156.774	58.9691	44.0832	117.259	136.396	100.724	63.9142	2.62964	5.70736	5.70297	5.67215	5.09106	5.09805	4.28127	4.56044	7.40007
ASHGA5P044121	0.0142161	-2.41809	down	noncoding	ENST00000531549	AF131215.4	GENCODE	1710	chr8	-	10994407	10996117		GCAACATAGTGTCTTCTACCATCTTTTTCCTCTTAAGGGTCAACACTACTATTCTATTTC	intron sense-overlapping	NM_173683	XKR6	XK-related protein 6 isoform b	-	10753656	11058875	35.8169	63.5246	4.19035	5.46422	5	50.5066	115.315	44.3802	41.5406	8.67859	5	16.1142	45.015	82.9922	18.8532	91.8587	110.946	61.5909	33.4165	2.62964	4.46371	5.39786	4.91106	5.22394	4.56823	2.61568	3.71265	5.5461
ASHGA5P052371	0.0142254	-1.51826	down	noncoding	ENST00000512128	CTB-118N6.3	GENCODE	479	chr5	+	115783242	115785557		GTCAAGGCAATTCACCATAAGGAAAGAGTGTACAAGACGGTAAGATATCAAATAATTTTC	natural antisense	NM_020796	SEMA6A	semaphorin-6A precursor	-	115779250	115910551	8.274	12.9362	2.71996	3.32238	5	11.4814	17.8293	8.98069	5	5	5	7.90058	14.242	16.406	5	10.5568	15.4506	21.6713	7.22639	2.62964	2.68553	3.03601	2.94453	2.3654	2.57053	2.61568	2.91239	3.82661
ASHGA5P017372	0.0143686	-2.51406	down	noncoding	ENST00000440778	RP4-717I23.3	GENCODE	596	chr1	-	93775309	93804091		CTCATGGTCCTGCACTCCATGGACTAAATTATGATGAAACTGAAACACAAAAAATTTAGA	intergenic							627.484	1177.92	8.47104	9.80106	33.5438	1098.72	2261.25	623.863	460.351	147.027	78.6949	316.421	1194.4	1285.34	275.394	953.027	2156.14	1379.24	1001.93	6.5336	8.90539	10.033	8.81463	8.70123	8.68483	8.25406	7.84159	10.0214
ASHGA5P044549	0.0143873	-2.23868	down	noncoding	ENST00000568248	AC083843.1	GENCODE	6253	chr8	-	135804262	135810515		AATTATTTCCCAGTTACCATGTTTTAAAACAGCCTCTCAGAATTCCCCACTTCTAATTTC	intergenic							247.773	505.922	7.36574	8.52839	16.7002	484.281	642.4	320.942	150.291	91.2274	38.9518	237.387	1065.85	309.977	232.135	407.317	474.456	642.551	409.164	5.66864	7.72354	8.0044	7.80738	7.05639	7.97172	7.26893	7.42492	9.90033
ASHGA5P020722	0.0143967	-3.26613	down	noncoding	ENST00000518964	RP11-622O11.2	GENCODE	585	chr8	-	126934614	126963493		CTTTCCACAGGTATCCCACTTCTAAGATGCCTGATCTGAAGGACAGTAAAACAACTGACC	intergenic							439.062	828.092	7.64265	9.35023	10.7143	666.196	1256.25	814.883	372.158	67.8046	14.4073	310.089	697.357	593.905	298.574	1167.42	1164.46	877.822	997.113	5.07555	8.19512	9.09757	9.24889	8.40693	7.54693	5.76151	7.80868	9.38661
ASHGA5P043681	0.0144608	-9.58158	down	noncoding	uc003tqy.3	CO9	UCSC_knowngene	505	chr7	+	55840871	55841376	NM_004577	CAATTAAACACCTTTACTCTTAGGAATATAGATTCGGCAGCCTTCAGTGAATATTGGTTT	intergenic							190.474	1445.09	5.95097	9.21123	9.22554	79.8132	103.262	73.1024	26.1361	1176.93	19.7454	35.5838	4208.92	922.503	976.967	1557.02	100.38	2279.22	70.6295	4.87148	5.10191	5.23425	5.62368	4.57693	11.2444	6.23272	4.72236	11.5679
ASHGA5P027164	0.0144686	-1.97423	down	noncoding	ENST00000427824	RP3-467K16.4	GENCODE	5178	chr1	-	15729474	15735929		TTATGCGGCAGGCAACAGCTGTGCAGATCCTAATAATCTACTCTGGGTGACAGTTTAACA	bidirectional	NM_024329	EFHD2	EF-hand domain-containing protein D2	+	15736390	15756839	141.68	286.545	6.7126	7.69389	15.1237	334.966	230.741	204.188	136.81	50.4813	27.3004	133.834	594.673	183.791	138.474	361.634	229.367	341.373	156.507	5.54119	7.19685	6.47158	7.11788	6.92173	7.12685	6.7316	6.59309	9.18741
ASHGA5P041852	0.0146041	-2.32729	down	noncoding	ENST00000444038	RP1-8B1.4	GENCODE	453	chr6	-	46064829	46097328		GACATCAGTACTCTTCACCTCCAAACATTTCAGCAACATATCATTAACGATAGTCAAAAA	bidirectional	NM_014936	ENPP4	ectonucleotide pyrophosphatase/phosphodiesterase family member 4 precursor	+	46097700	46114436	66.196	159.577	5.57561	6.79427	9.2486	72.5211	169.813	134.572	52.5182	35.8857	9.12836	45.8809	182.329	107.802	98.7787	169.932	106.713	392.593	58.892	4.87481	4.97229	5.99836	6.50921	5.53864	6.62441	5.01124	5.07596	7.6259
ASHGA5P015205	0.0146464	-2.02556	down	noncoding	ENST00000417869	RP11-69E11.4	GENCODE	487	chr1	-	39987951	40011433	NR_003929	GGCACAGCAGAAACAAGGAGAGTCAGCAATTACCAGCCAGCCAAGGTCCTGGAAGCTGAC	natural antisense	NM_181809	BMP8A	bone morphogenetic protein 8A precursor	+	39957317	39995541	210.658	318.804	6.98055	7.99887	41.3426	348.82	657.872	341.52	175.83	39.4187	21.7101	58.7477	381.621	240.605	245.833	343.464	444.772	357.776	217.556	6.78186	7.25016	8.03838	7.90723	7.2847	6.77067	6.38033	5.43105	8.61279
ASHGA5P030571	0.0146583	-1.72015	down	noncoding	ENST00000560199	RP11-361D15.2	GENCODE	402	chr15	+	59980715	59981617		ACAGACAAGTAACTCTCCAGCGGCATGAAATGCATCCAGAAATCCAAACCATTTTGCCAG	natural antisense	NM_004330	BNIP2	BCL2/adenovirus E1B 19 kDa protein-interacting protein 2	-	59955061	59981642	7.51726	13.8865	2.66605	3.44859	5	12.6556	11.901	7.56221	5	5	5	8.01933	27.5022	5.99334	7.2866	11.071	14.9286	24.1953	6.22887	2.62964	2.7754	2.65928	2.78015	2.3654	2.57053	2.61568	2.93235	4.78976
ASHGA5P041804	0.0147401	-1.88279	down	noncoding	ENST00000526611	RP1-179N16.6	GENCODE	587	chr6	-	36114474	36164980		TAACACTTAACTACTATAGTGTACCACACAAGGAGAGAGCAGCATTAGAGAGGGGTGCCA	intronic antisense	NM_015695	BRPF3	bromodomain and PHD finger-containing protein 3	+	36164549	36200567	14.4462	27.9642	3.52376	4.43663	5	23.5861	21.5886	22.6034	12.3052	12.5155	5	12.9705	19.8739	20.0066	20.338	41.0918	39.3235	29.256	25.8594	2.62964	3.49692	3.23641	3.98466	3.64825	5.10672	2.61568	3.47176	4.30079
ASHGA5P018511	0.0148195	-2.35071	down	noncoding	ENST00000454416	AC017104.6	GENCODE	466	chr2	+	232258492	232259702		CGGGTGAGAGGATTAAGTGAGCCAGTCATGCATGGGCCGAGAACCAGGTTTGGCATATTG	intergenic							14.7613	28.685	3.00176	4.23486	5	26.5599	48.3069	18.2235	5	5	5	5	31.2004	13.6963	9.08768	29.8185	25.4726	81.1651	10.3549	2.62964	3.63554	4.11919	3.73789	2.3654	2.57053	2.61568	2.34018	4.97739
ASHGA5P043650	0.0148417	-3.60013	down	noncoding	TCONS_00018111	XLOC_008372	LincRNAs identified by Cabili et al	231	chr10	+	6667902	6668997		TATAAATGGTGCCCAGATGAACAACCACACTGAGTACAAAGGATGGTGTCTGAGATCACG	intergenic							63.2286	103.506	4.37332	6.22137	5	41.7861	255.203	111.725	38.8939	5	5	43.2201	104.79	85.6588	32.152	130.987	187.112	122.695	61.1441	2.62964	4.19784	6.61496	6.2284	5.13749	2.57053	2.61568	4.99203	6.81869
ASHGA5P023498	0.014926	-1.79412	down	noncoding	ENST00000582261	AC015818.3	GENCODE	2334	chr17	-	20422624	20432000	ENST00000445433, uc002gxc.1	TGGACAAACACCTCATTCCAGTAGCTGACACTGGCAATTGAACTAATTGACACCTACCAC	intergenic							12.3886	19.9206	3.0538	3.89707	5	16.004	33.9031	13.1845	5.81478	5	5	15.2026	28.3339	12.102	6.63283	17.3216	33.498	30.8074	10.7482	2.62964	3.03971	3.71276	3.37582	2.83957	2.57053	2.61568	3.64665	4.83958
ASHGA5P035174	0.0149772	-2.36376	down	noncoding	ENST00000411738	AC159540.1	GENCODE	724	chr2	-	98081773	98089122	ENST00000431244, NR_040097	AGTATTCCTGGTCTCGAATCATCCTGATATTCTTCATTTTGTTATTCACATTGGACTAGG	intergenic							372.126	663.992	7.64857	8.88965	63.2651	623.686	1288.71	478.834	244.849	35.4484	25.4653	216.753	638.676	671.018	194.742	761.138	956.581	1208.51	217.285	7.2586	8.09658	9.14143	8.39375	7.77743	6.60157	6.63136	7.28779	9.27499
ASHGA5P028567	0.0152239	-1.73039	down	noncoding	BM728564		LincRNAs identified by Khalil et al	568	chr1	+	210425878	210426445		TACAGGAAGGAAATGTGACAGCACAAGCCGTTCGCCATCACCCAGGAGCTGTCAGCAGCT	intergenic							8.63856	13.741	2.76067	3.55177	5	12.9228	17.3204	7.8011	5	5	5	11.0642	16.5707	15.9827	15.8496	5	8.54645	16.3133	17.9241	2.62964	2.7952	3.00619	2.80908	2.3654	2.57053	2.61568	3.29366	4.02968
ASHGA5P042162	0.01527	-2.26035	down	noncoding	NR_024277	AGPAT4-IT1	RefSeq	1869	chr6	-	161581163	161583014		TTTTCCTCTCAGCATCAGAGAAGGCAGAAAGCAAGAGAAAGGAATGCAATGTGAGCAAGG	intron sense-overlapping	NM_020133	AGPAT4	1-acyl-sn-glycerol-3-phosphate acyltransferase delta	-	161551056	161695107	174.578	319.161	6.76668	7.94322	8.2317	242.483	471.792	291.693	182.333	48.9265	24.6572	126.508	418.275	195.092	178.234	308.217	539.689	364.347	230.273	4.71786	6.71605	7.53916	7.65607	7.33317	7.07794	6.58136	6.51178	8.73961
ASHGA5P000452	0.0153059	-1.50373	down	noncoding	chr5:3618525-3632100+	chr5:3618525-3632100	LincRNAs identified by Khalil et al	13575	chr5	+	3565525	3579100		ACATCATGTCTTCCAGGGCTACCTACAAGAGGGTGACATTTTACCATAGAAACTCCATGG	intergenic							8.12625	11.9395	2.7524	3.34095	5	9.55881	7.79896	18.0402	5	5	5	9.612	9.28679	12.1189	5.90188	12.4434	14.7253	14.7063	14.3942	2.62964	2.54472	2.42897	3.72636	2.3654	2.57053	2.61568	3.13791	3.30451
ASHGA5P053690	0.0153217	-3.62638	down	noncoding	uc010mmq.1	MGC21881	UCSC_knowngene	2566	chr9	-	41952395	41955076	ENST00000446626, NR_015363	TAATCTTTAATACCTGGTGGAGTGCTCTGTTTACTTATTTCTGCGTAATTAACCACCCCT	intergenic							58.2435	127.591	4.47758	6.33612	5	92.596	168.49	76.297	59.0216	5	5	54.543	53.6981	128.314	28.088	198.963	236.137	199.961	47.9788	2.62964	5.3187	5.98572	5.68549	5.69366	2.57053	2.61568	5.32124	5.82415
ASHGA5P018025	0.0155436	-2.13564	down	noncoding	ENST00000448465	LINC00476	GENCODE	290	chr9	-	98632564	98637352		CAGCACAGATAGACGGATCCGTCTCTGCCCTTGATCACATCAGCAGAATCCTTTTGCCAT	bidirectional	NM_001010895	ERCC6L2	RAD26L hypothetical protein	+	98637899	98731122	23.4244	35.4261	3.583	4.67767	5	52.7894	61.237	24.2025	17.3087	5	5	16.8572	19.5085	30.6768	23.1951	38.753	38.9141	78.7655	18.1694	2.62964	4.52781	4.44404	4.07768	4.03867	2.57053	2.61568	3.75996	4.27222
ASHGA5P032812	0.0160001	-1.9923	down	noncoding	TCONS_00029017	XLOC_013940	LincRNAs identified by Cabili et al	447	chr21	+	40383132	40386878		ACGAATCAGCAAACAAAGGAGAAATTAAGGTTCTGCCCACTTTTGTGGTTTTTGCTTTTC	intergenic							27.8662	44.4473	4.01011	5.00455	5	44.2998	69.5326	40.6777	23.5838	7.42151	5	27.4142	36.4049	50.5743	20.2697	51.7781	85.2936	45.3007	21.51	2.62964	4.27983	4.63156	4.78831	4.43427	4.32819	2.61568	4.37342	5.2151
ASHGA5P058187	0.0160105	-3.1574	down	noncoding	TCONS_00027642	XLOC_013181	LincRNAs identified by Cabili et al	425	chr19	+	58782948	58785962		ACATGAGGAGAAATTTGGAGACAGACAACTTGTCACGCATACAGGGAAAATGACATTTGA	intergenic							43.5546	79.2411	4.21577	5.8745	5	109.465	72.0366	64.7235	33.9316	5	5	53.2807	110.411	57.2048	28.7381	88.7796	59.3928	83.0704	127.091	2.62964	5.54795	4.68263	5.44828	4.94041	2.57053	2.61568	5.29099	6.89688
ASHGA5P028821	0.0161502	-1.54626	down	noncoding	uc021ogv.1	BC015342	UCSC_knowngene	1257	chr1	-	16955701	16956958	ENST00000362058	AGGCTAGTGTGTATCCCTGGAACCAGAAGAGAGTAGGTGGGCTCTGGAGGCCTCAAAGGA	intergenic							8.11932	11.6305	2.68299	3.31177	5	9.98802	19.4417	5	5	5	5	10.5248	14.5871	9.21759	6.70655	7.2902	11.0106	24.4937	8.10792	2.62964	2.57773	3.12934	2.33704	2.3654	2.57053	2.61568	3.23852	3.8543
ASHGA5P017682	0.0163232	-2.13992	down	noncoding	ENST00000444660	RP11-139J15.2	GENCODE	524	chr10	-	18943616	18948196	ENST00000456217	TTCACTTCCGGTGGGAAGGATACGAGCAAGATAAAGCAGCGAGGGATTTAAGTCTGGCAA	bidirectional	NM_178815	ARL5B	ADP-ribosylation factor-like protein 5B	+	18948312	18966940	16.2933	28.8801	3.34806	4.44561	5	22.6913	34.8858	25.8425	13.0337	5	5	18.8931	35.2318	20.4696	17.0877	10.1443	44.5023	49.8342	24.8909	2.62964	3.45425	3.74281	4.16082	3.7086	2.57053	2.61568	3.90211	5.1652
ASHGA5P050762	0.0164049	-2.49278	down	noncoding	NR_034089	LOC100131564	RefSeq	4033	chr1	-	93775665	93811368		CATGGTCCTGCACTCCATGGACTAAATTGTAAGTATAATTACTACCAATGTACTCTATAA	bidirectional	NM_001938	DR1	protein Dr1	+	93811477	93828148	880.424	1802.62	9.12932	10.4471	60.1112	1610.32	2854.97	962.244	599.795	369.586	146.502	439.863	2198.02	1793.58	429.519	1285.21	3180.72	2080.81	1650.47	7.19858	9.45606	10.4318	9.49567	9.0932	9.9258	9.10736	8.32612	10.776
ASHGA5P050426	0.0164577	-1.52056	down	noncoding	ENST00000453289	AC074117.10	GENCODE	536	chr2	+	27580006	27581057		CAGCTAGACCAGAGAGTCTGTACCTGCAACCCTGGCGGCGTCCGAGCCCAAGGCGGAGTC	bidirectional	NM_001035521	GTF3C2	general transcription factor 3C polypeptide 2	-	27548720	27579868	7.07339	10.8567	2.61801	3.22261	5	10.1853	15.4442	5.81407	5.14352	5	5	5	21.7661	9.63736	8.80511	7.86273	10.4336	10.6269	6.86496	2.62964	2.59274	2.88691	2.57884	2.72955	2.57053	2.61568	2.34018	4.42894
ASHGA5P031884	0.0166511	-2.22407	down	noncoding	TCONS_00007239	XLOC_003221	LincRNAs identified by Cabili et al	790	chr3	-	113432277	113433137		AATAGAGGCTGAGAGGAAATTTTGGGCATGATATGTTTATGGCATTGTGATGGGTTCATG	intergenic							174.96	377.201	6.99622	8.14943	10.8995	340.222	315.001	264.165	113.195	121.592	31.4403	203.167	544.08	306.705	117.383	470.418	478.54	434.285	288.999	5.09979	7.2143	6.94428	7.51528	6.63461	8.40729	6.95617	7.19806	9.07787
ASHGA5P040391	0.0166637	-3.17474	down	noncoding	ENST00000514048	RP11-1023L17.1	GENCODE	5001	chr5	-	34164802	34189619		ATGAAGTGAGTACCTGGAGGAACTCCTACATTTTAGGCTTTCAAAGGTTACAGGCTTTTC	intergenic							35.9583	68.7425	3.75629	5.42292	5	48.4919	136.969	55.8336	26.3718	5	5	5	19.5707	100.746	14.2799	91.9967	106.048	106.435	42.1213	2.62964	4.40763	5.6621	5.23498	4.58953	2.57053	2.61568	2.34018	4.27693
ASHGA5P018163	0.0168226	-1.86392	down	noncoding	ENST00000450157	RP11-69E11.4	GENCODE	599	chr1	-	39987951	40007432		CACCTGCCAGAAACAAGGAGAGTCAGCAATTACCAGCCAGCCAAGGTCCTGGAAGCTGAC	natural antisense	NM_181809	BMP8A	bone morphogenetic protein 8A precursor	+	39957317	39995541	178.817	276.548	6.89685	7.79519	34.7252	278.021	553.895	284.783	141.535	54.1609	26.1955	57.2183	300.053	230.027	194.819	263.857	409.027	338.646	199.404	6.576	6.92505	7.78225	7.62549	6.96856	7.2259	6.67585	5.39571	8.31309
ASHGA5P050887	0.0171652	-1.68112	down	noncoding	ENST00000456398	AC093642.5	GENCODE	1235	chr2	+	243030783	243082789		GAGAGGCGGTGGCCCACTTCCGGCAATAATCGCCTGGTCGCCGTCAGGTGCCGGCCCAGG	intergenic							83.6393	118.8	5.78639	6.53581	16.6447	106.962	205.327	132.426	96.4045	13.2437	7.6834	90.4231	95.9859	106.788	71.0985	145.03	189.81	94.4652	128.424	5.66452	5.51189	6.28992	6.48482	6.40511	5.18824	4.70993	6.03668	6.6997
ASHGA5P035942	0.0171886	-1.72577	down	noncoding	uc002sla.3	DQ588163	UCSC_knowngene	1121	chr2	+	74642573	74643694		GTGACAGATACTTAGTAGATGTTTGACCTAATAATTTTCATTAACAGCCCACTAACCACA	natural antisense	NM_001145054	C2orf81	uncharacterized protein C2orf81	-	74641302	74644844	9.63823	17.229	2.81155	3.59879	5	14.1763	23.8731	11.6594	5	5	5	7.39707	22.1693	12.9703	5	20.7623	32.7964	13.0726	13.8321	2.62964	2.89091	3.34551	3.23287	2.3654	2.57053	2.61568	2.84184	4.45768
ASHGA5P041107	0.0173198	-2.05494	down	noncoding	ENST00000500224	RP11-266N13.2	GENCODE	729	chr5	+	58335587	58359330		CACTTGCATTTGCAGCATAATGAATTCATTAGCAACACTGTGGATCAATGCTATACATAA	intronic antisense	NM_001104631	PDE4D	cAMP-specific 3',5'-cyclic phosphodiesterase 4D isoform PDE4D4	-	58264865	59189621	11.6732	27.4242	3.26278	4.30188	5	15.0361	18.2222	21.4757	8.94708	6.48161	5	13.2233	38.6545	21.3057	8.36971	17.6535	26.7607	61.9273	17.2978	2.62964	2.9631	3.05987	3.92129	3.29311	4.12556	2.61568	3.49402	5.31216
ASHGA5P041671	0.0173904	-1.82902	down	noncoding	ENST00000566170	RP1-223E5.4	GENCODE	1045	chr6	-	13614342	13615387		CAAATGTCTGTGTAGTTTCTGCACTTCATAACAGCTTATATGACAGTTGCTCCAGCCATT	natural antisense	NM_001193267	SIRT5	NAD-dependent protein deacylase sirtuin-5, mitochondrial isoform 3	+	13574760	13615390	18.1817	24.4825	3.32922	4.20029	5	32.913	57.1393	17.324	9.78701	5	5	13.2904	38.4315	20.362	9.09222	29.5781	31.7374	25.4016	16.7747	2.62964	3.89516	4.35032	3.68108	3.39174	2.57053	2.61568	3.49956	5.3022
ASHGA5P022065	0.0174945	-1.71044	down	noncoding	ENST00000548361	RP11-44N21.1	GENCODE	346	chr14	+	105561661	105562104		GGGGGCCCAGCTGTTGTCCACACCAAGGGTGGCCTACAGAGGGAAGTGAGGACCTTGGGA	intergenic							8.09408	13.2622	2.66405	3.43842	5	11.3167	18.8061	9.6298	5	5	5	5	21.3323	8.08091	6.97158	5.90149	13.0857	28.9916	8.47194	2.62964	2.67375	3.09611	3.02111	2.3654	2.57053	2.61568	2.34018	4.39926
ASHGA5P053449	0.0180019	-2.83197	down	noncoding	ENST00000520944	SNHG6	GENCODE	638	chr8	-	67834052	67837831		TAAGAGCTGTCTTCCGATGTCGCTCTTCCTTTCCCGCGCGACCGGCGAGGGAGGAAGAAG	natural antisense	NM_173518	MCMDC2	MCM domain-containing protein 2 isoform a	+	67782983	67834283	47.2673	97.0011	4.62966	6.13147	11.3546	76.4222	73.7358	99.3791	48.7824	5	5	58.4646	49.0561	55.1001	44.9283	127.187	153.629	150.276	98.8312	5.15694	5.04585	4.71913	6.068	5.43437	2.57053	2.61568	5.42678	5.6728
ASHGA5P040489	0.0180576	-3.42038	down	noncoding	uc010ixu.3	LOC100170939	UCSC_knowngene	1181	chr5	-	69422176	69881549	NR_024054, NR_029426, uc003jyo.1, uc003jzw.3, uc011crg.2, uc011crl.1	GCCAACCTGTGATACCTTCACTCTAATTTTACTTTCTGAGGAAGTTTTCTGTAATAGTTA	intergenic							1163.06	2387.17	9.11051	10.8847	25.5385	1156.22	4065.67	1684.97	1055.74	172.319	55.4349	1088.62	2260.36	1600.35	922.334	1593.82	5260.85	2978.46	2093.99	6.19573	8.97793	11.0033	10.3282	9.98857	8.89199	7.77412	9.72415	10.8242
ASHGA5P030552	0.0181798	-2.72122	down	noncoding	ENST00000560518	RP11-430B1.2	GENCODE	1972	chr15	+	52472413	52498071		CCCAAGTTTTTTCCTTCAGGATAAATCATCCTTATATAAAGAAAACTACCAACAGCGTAC	intronic antisense	NM_016194	GNB5	guanine nucleotide-binding protein subunit beta-5 isoform b	-	52413122	52483565	42.7532	80.1835	4.3669	5.81115	5	53.5834	108.941	87.5976	45.5413	6.42626	5	29.9363	50.2561	44.204	26.4825	146.294	78.3828	138.827	76.8387	2.62964	4.54493	5.31189	5.88097	5.34306	4.11575	2.61568	4.49327	5.71388
ASHGA5P035948	0.0182189	-2.67782	down	noncoding	uc021ojb.1	RCAN3AS	UCSC_knowngene	277	chr1	-	24822822	24828850	NR_045407, NR_045408, NR_045409	AGGTGTCTGTTGCAGCCAAACACAATCCCAACTGATATTCACTGTAAATGATTCCATGGC	natural antisense	NM_001251979	RCAN3	calcipressin-3 isoform 1	+	24828840	24863510	216.324	494.381	7.04635	8.46741	8.31841	287.475	693.171	326.108	92.6999	116.314	33.3794	173.127	1001.64	302.899	162.216	428.586	668.769	551.159	345.401	4.73477	6.97524	8.13442	7.8347	6.34554	8.34295	7.03929	6.96388	9.82293
ASHGA5P042496	0.0185358	-3.24906	down	noncoding	ENST00000445310	KCNQ5-IT1	GENCODE	563	chr6	+	73340222	73388282		ATTATTCAATTATTAAATAAAACCTTGCATTAGTGGCATTTCCAAATGCATAACAAAAAA	intron sense-overlapping	NM_001160130	KCNQ5	potassium voltage-gated channel subfamily KQT member 5 isoform 2	+	73331570	73908573	211.816	697.823	7.15809	8.85811	5.66858	288.959	473.888	335.502	217.769	167.813	40.7778	164.153	1663.11	271.196	186.767	686.629	608.314	822.675	646.076	4.19241	6.98447	7.54504	7.87451	7.59495	8.85519	7.33269	6.88546	10.4414
ASHGA5P029304	0.0188649	-4.63592	down	noncoding	ENST00000565058	RP11-747H7.3	GENCODE	3040	chr14	-	92223102	92226142		CCCTACTGCCTATTTCTAGGTGCTGTTCCCTTTAATAAGTATATTTTGAACATCATTTGT	intron sense-overlapping	ENST00000553676	CATSPERB	catsper channel auxiliary subunit beta [Source:HGNC Symbol;Acc:20500]	-	92189480	92247032	284.489	588.645	6.63063	8.84348	5	439.912	816.278	546.584	131.723	45.2602	6.12715	285.025	554.38	539.891	221.299	602.554	661.821	1023.42	517.143	2.62964	7.5886	8.40572	8.59175	6.86509	6.9648	4.30301	7.69639	9.10006
ASHGA5P028554	0.0194017	-2.13287	down	noncoding	ENST00000424106	KPNA3-IT1	GENCODE	2923	chr13	-	50351803	50354767		GGTTATGTGGGCTAAGCAGGTTGATGTGGTTAATTTTTAACTTCCAAAGATGTTTATAAG	intron sense-overlapping	NM_002267	KPNA3	importin subunit alpha-3	-	50273442	50367057	19.9426	30.9818	3.30989	4.40268	5	28.9902	77.9767	20.081	9.95034	5	5	7.5422	20.6604	27.2405	5.28545	34.8518	57.1688	47.4898	24.1759	2.62964	3.7364	4.80947	3.8469	3.40934	2.57053	2.61568	2.86115	4.35737
ASHGA5P015208	0.0194995	-3.14286	down	noncoding	ENST00000417930	AC092580.4	GENCODE	243	chr2	+	7865931	7870836		TTGTTCTCAGAGGTCTGGACCAAAGAGAAACAAGAAAAGCTGGAGTCACACTACCAAAGG	intergenic							757.228	1716.18	8.78716	10.4392	19.8733	1251.58	1410.5	1730.62	699.77	539.917	66.2166	339.344	1504.34	869.846	771.722	2195.01	1968.84	2251.41	2452.09	5.89154	9.11407	9.27655	10.3689	9.3478	10.3293	8.02829	7.94083	10.3042
ASHGA5P019025	0.0195192	-1.99354	down	noncoding	ENST00000489077	RP4-545C24.1	GENCODE	423	chr7	+	143904784	143940928	ENST00000463561, ENST00000464929, ENST00000467944, ENST00000486094, ENST00000493248, ENST00000496968	AGTTAGCTGGTTCCAAGTGACCCTCCAAGGGGAAGAGTGCTGGATTCAGAGCCCACCTCA	intronic antisense	NM_001001802	OR2A42	olfactory receptor 2A1/2A42	-	143929003	143929936	80.1295	135.948	5.57797	6.5733	7.93259	137.542	217.798	105.014	59.6177	6.89882	12.567	93.6672	145.815	90.559	45.3376	169.843	296.278	132.127	71.676	4.66291	5.88057	6.37815	6.14911	5.7089	4.21652	5.54371	6.08389	7.2847
ASHGA5P047238	0.0197128	-3.10935	down	noncoding	ENST00000561822	RP11-5N23.3	GENCODE	697	chr10	+	6628185	6628882		AAACAAAACCACACCTGGATTGCCTGGTACTTAAATAAAATGCACTATGATGATTGAAGA	intergenic							83.5569	186.965	5.40491	7.04153	5	109.462	268.257	143.095	77.0948	34.774	9.35432	21.4181	267.5	154.647	43.6704	258.6	267.904	220.826	95.6086	2.62964	5.54769	6.69137	6.60788	6.0769	6.57816	5.0528	4.05485	8.15688
ASHGA5P044839	0.0197238	-3.56477	down	noncoding	ENST00000518993	RP11-25K19.1	GENCODE	1079	chr8	+	60031776	60033905	ENST00000517898	ATAACAGCTTCCCAAATACTGTTGTAGATACTAAAATGTGCCTGTATGTATTTCCTTCCA	bidirectional	NM_014729	TOX	thymocyte selection-associated high mobility group box protein TOX	-	59717976	60031767	91.0073	190.174	5.29709	7.13089	5	164.052	212.838	178.222	74.9749	27.0722	5	60.8991	241.771	163.945	69.747	257.498	174.141	319.976	104.142	2.62964	6.14998	6.34667	6.90854	6.03309	6.21353	2.61568	5.47957	8.0171
ASHGA5P038939	0.0197254	-4.251	down	noncoding	uc021xcj.1	AX747104	UCSC_knowngene	3171	chr3	+	111442569	111445740		GGCTTTTTACCCCTAGGAAATAATTGTCCAAGTATATATCTCGTCTTCTTTCTTGTAACT	intron sense-overlapping	NM_001185106	PLCXD2	PI-PLC X domain-containing protein 2 isoform a	+	111393522	111565294	129.573	305.332	5.70934	7.79714	5	180.427	284.844	255.834	131.937	29.0671	5	144.476	266.691	217.868	93.4093	403.915	324.358	608.199	222.881	2.62964	6.27901	6.78088	7.46656	6.86908	6.32862	2.61568	6.70524	8.15402
ASHGA5P049112	0.0198031	-3.37979	down	noncoding	uc002djl.3	RRN3P1	UCSC_knowngene	1149	chr16	-	21821749	21831731		CATATCACAGAGCCTTGCAAATAATAGCAAGATATGTACCATCATGAGTATACTTTTCCT	intergenic							110.956	226.95	5.65038	7.40731	5	144.473	282.25	249.283	54.5166	28.603	5.4675	118.054	342.17	159.283	112.438	166.684	238.062	407.34	162.67	2.62964	5.96016	6.76946	7.42596	5.59293	6.30393	4.10841	6.41256	8.47901
ASHGA5P016889	0.0199749	-4.75248	down	noncoding	uc002uns.1	AK125001	UCSC_knowngene	1765	chr2	+	181988563	182264280		CAACTCAGAGTTTCATCCTAAACTGAGAGACCAACATCAAAAGAATCTTCTCAAGTTTCT	intergenic							164.397	382.255	5.87483	8.12351	5	219.156	372.741	263.004	230.582	17.9714	5	201.722	240.84	300.598	107.093	464.055	417.257	742.458	403.483	2.62964	6.56634	7.18321	7.50722	7.68034	5.6289	2.61568	7.18731	8.00917
ASHGA5P047453	0.0201014	-2.67618	down	noncoding	ENST00000562082	RP11-119F7.5	GENCODE	2295	chr10	+	70458256	70460551		TTTGGTGCACAGCAGGTTGTACATGATTTCATGTTTATGTAGCAAAATGCATTGAAATGT	intergenic							27.844	54.2542	3.664	5.08418	5	39.1606	84.0763	56.6868	8.98149	5	5	18.8469	22.6823	46.9361	7.66977	71.2557	83.8855	107.261	40.0896	2.62964	4.11273	4.92514	5.26166	3.29802	2.57053	2.61568	3.89863	4.49477
ASHGA5P039148	0.0201987	-3.7925	down	noncoding	ENST00000564623	RP4-714D9.5	GENCODE	5067	chr1	+	100496121	100501188		GCCAGCTGTATTCACAACCCAAATCACATACAAAGCGACAAGTTCATACACAATAGGCCT	intergenic							81.3433	132.669	4.66822	6.59136	5	109.818	253.135	180.601	47.1768	5	5	45.0152	75.4573	90.7106	58.1383	168.664	188.821	252.675	94.2191	2.62964	5.55403	6.60472	6.93115	5.39043	2.57053	2.61568	5.04955	6.33907
ASHGA5P034473	0.0203646	-2.50291	down	noncoding	uc021upk.1	AX747599	UCSC_knowngene	2683	chr19	+	11943741	11946424	NM_021915	GGCATCTGTAAACTCCTGGACCTGTTTTTGCCTTACTTATTCTCTAAAGACTAAAATATT	exon sense-overlapping	NM_152357	ZNF440	zinc finger protein 440	+	11925106	11946016	329.238	572.371	7.43713	8.76074	14.4174	624.006	864.522	437.198	274.828	79.9099	12.5275	326.491	903.577	561.075	199.207	653.746	773.594	569.341	346.057	5.47907	8.09776	8.49575	8.26629	7.94407	7.78794	5.53712	7.88903	9.70241
ASHGA5P048890	0.0203872	-2.08994	down	noncoding	uc021suf.1	AK054710	UCSC_knowngene	2315	chr15	+	89939404	89941719	NR_015411, uc002bnv.2	TTGTGGTTTCTGTACCATCACATGCCTATTTTAAGACACTCTCCAGCACTGTCGGTTAGG	intergenic							22.6081	43.0562	3.86777	4.93123	5	38.745	56.8362	32.1521	13.4481	5	9.90691	19.7765	43.4188	24.7911	14.723	58.6923	82.6117	48.9487	28.2075	2.62964	4.09746	4.34367	4.45538	3.74374	2.57053	5.14899	3.95272	5.49548
ASHGA5P041623	0.0204234	-2.79631	down	noncoding	TCONS_00020555	XLOC_009868	LincRNAs identified by Cabili et al	2469	chr12	+	105789467	105806934		TAAAAGATGCCATAAAACACCAAGTGCATAAAACTCTAGACACCTTGTTCTCCATGTCAT	exon sense-overlapping	ENST00000549893	C12orf75	chromosome 12 open reading frame 75 [Source:HGNC Symbol;Acc:35164]	+	105724487	105789875	48.5494	83.4695	4.40448	5.88801	5	78.0527	156.479	82.851	33.8379	7.58453	5	19.5905	98.3948	61.2894	24.3731	91.9863	99.1626	160.461	48.619	2.62964	5.0728	5.8708	5.80116	4.93587	4.36901	2.61568	3.9409	6.73512
ASHGA5P029119	0.0204696	-2.96106	down	noncoding	ENST00000555403	RP11-247L20.4	GENCODE	446	chr14	-	50793243	50794627		ATTCTGAGTAAGTCTGTATGCTATCAAGAACACAAGAATGCAGGATCATGGGAAATGCAC	intronic antisense	ENST00000358473	ATP5S	ATP synthase, H+ transporting, mitochondrial Fo complex, subunit s (factor B) [Source:HGNC Symbol;Acc:18799]	+	50785951	50802276	47.3965	79.8037	4.30023	5.86635	5	71.6496	103.748	69.6955	31.6764	5	5	87.4028	72.1638	75.2434	23.3101	101.043	96.1675	130.098	60.5997	2.62964	4.95138	5.24219	5.55403	4.84315	2.57053	2.61568	5.99528	6.26552
ASHGA5P044081	0.0204851	-2.35954	down	noncoding	ENST00000523225	RP11-115C21.2	GENCODE	1017	chr8	-	6263117	6264663		GGAGATGTTGGTAGTGAAATTCATGTACTTTTAGTTCTTTCTATGGAATCTAGAGGTAGA	natural antisense	NM_001172574	MCPH1	microcephalin isoform 2	+	6264112	6304940	41.2185	64.0849	4.31062	5.54913	5	78.8359	118.062	49.4494	19.7017	7.5571	5	46.1419	61.1097	72.7019	20.523	80.0144	76.8625	99.7466	37.6364	2.62964	5.08761	5.43381	5.06077	4.20941	4.36248	2.61568	5.08557	6.02078
ASHGA5P040780	0.0206208	-3.82988	down	noncoding	ENST00000417986	RP11-277L2.2	GENCODE	324	chr1	+	149575481	149615903	ENST00000422629, ENST00000426786, ENST00000429388, NM_001178055, NR_024584	AATGTGCCAGTTGATTCTGACAATTTCTCATGAACAGAAACACCTAGGAAGGGAGAACTG	intergenic							199.306	353.359	6.04575	7.98305	10.2988	362.88	732.788	247.291	81.5325	11.0469	5	143.613	378.134	238.079	97.5649	429.932	665.886	467.939	195.978	5.0236	7.30702	8.22695	7.4127	6.15966	4.92204	2.61568	6.69834	8.60327
ASHGA5P023233	0.0207356	-2.58014	down	noncoding	ENST00000575139	RP11-473M20.14	GENCODE	530	chr16	-	3166456	3182054		CCGGACCAAGTGTTCATCCATCGCCCTGTATTAGCGAAGAACAACATCAAGCTGGCTAGC	natural antisense	NM_001042428	ZNF205	zinc finger protein 205	+	3162562	3170518	39.8948	59.1081	4.04229	5.40974	5	76.0337	123.575	52.6682	20.9182	5	5	30.9628	52.8722	41.1005	23.1134	82.5693	84.8664	99.611	29.6236	2.62964	5.03947	5.50473	5.14899	4.28836	2.57053	2.61568	4.5409	5.80249
ASHGA5P026128	0.0207929	-1.61666	down	noncoding	ENST00000433035	AC124057.5	GENCODE	404	chr11	+	2425744	2429138		AGGATGACCAGCCAGTTGGCATAGAGGCTGGGGCAGGATGGTGAGTCCTCCAGCAGCAGT	natural antisense	NM_014555	TRPM5	transient receptor potential cation channel subfamily M member 5	-	2425745	2444275	12.4016	17.3201	3.15142	3.84443	5	22.2923	17.2467	12.9539	13.7778	5	5	17.942	12.9193	14.9998	22.2985	18.7513	13.6878	23.3227	15.2616	2.62964	3.43281	3.00206	3.35561	3.76963	2.57053	2.61568	3.83538	3.7042
ASHGA5P020083	0.0208685	-2.78234	down	noncoding	ENST00000507929	RP11-267L5.1	GENCODE	697	chr8	+	115294300	115307853	ENST00000520543	ACGCCGAGCTTCAGGTAACTCTCACAGTGGAAGGAAACGACGAGGCTGAATCCTGTTGGA	intergenic							35.5779	91.6924	4.25687	5.73317	5	54.1601	101.526	47.009	43.5949	5	8.186	20.1468	29.6773	79.753	21.9765	105.87	126.268	248.575	29.7269	2.62964	4.56184	5.20481	4.99395	5.2915	2.57053	4.82575	3.97698	4.90849
ASHGA5P058620	0.0209588	-3.44323	down	noncoding	uc011crg.2	SMA4	UCSC_knowngene	2025	chr5	+	69140556	69275149	NR_029426, uc003jzw.3	GAAGCTTAAGGTGTCAGTTTCTTGGTCGGGAATGAAAATAGTGCCAACCTGTGATACCTT	intergenic							801.99	1606.77	8.4793	10.2631	20.1014	765.831	2709.67	1155.23	754.716	100.632	22.3874	887.353	1221.46	1253.72	561.578	1031.1	3685.15	2063.85	1430.5	5.90523	8.39758	10.3508	9.75714	9.45772	8.11486	6.42921	9.42179	10.0406
ASHGA5P033274	0.0211246	-1.78321	down	noncoding	ENST00000559739	RP11-15E18.1	GENCODE	557	chr17	+	58603653	58628127		GGAAATTATTGGCCATAATTGTTGGTGACACTATCAAACTCATAGTCACTCTATAACGAT	bidirectional	NM_006380	APPBP2	amyloid protein-binding protein 2	-	58520519	58603580	13.6436	19.8327	3.07047	3.90495	5	22.3934	35.2484	19.7409	5	5	5	11.7662	27.8326	18.5656	6.70281	19.5391	22.5448	34.7883	8.85533	2.62964	3.43802	3.75368	3.82626	2.3654	2.57053	2.61568	3.36455	4.80794
ASHGA5P032716	0.021372	-3.06301	down	noncoding	ENST00000582866	RP11-498C9.15	GENCODE	2682	chr17	-	79836300	79838982		GCCTAAGGTAGGCCAGAGTTAATTTTTGTGTTATCTATACACGTTATTGAAGCGAATTAT	intergenic							71.3682	115.94	4.79979	6.41475	5	127.66	175.053	147.873	46.9392	5.47434	5	57.946	60.3141	121.139	41.4145	164.226	162.297	155.438	106.751	2.62964	5.77564	6.04214	6.65053	5.38378	3.8862	2.61568	5.41474	6.00035
ASHGA5P019401	0.0214962	-1.51365	down	noncoding	NR_033191	PPP2R2D	RefSeq	2440	chr10	+	133747959	133770053		TCAGGGAGAGAATAAAAGCCGCCCTCATTCTAGGGGAGAATATAATGTTTACAGCACCTT	exon sense-overlapping	NM_018461	PPP2R2D	serine/threonine-protein phosphatase 2A 55 kDa regulatory subunit B delta isoform	+	133747959	133770053	29.8356	46.4177	4.53929	5.13732	10.6161	54.2707	60.1699	36.3462	29.5123	6.06682	5.4764	36.2262	26.4068	45.184	27.1133	45.1903	59.6466	78.0527	43.3306	5.06244	4.56367	4.42058	4.63025	4.74326	4.03422	4.11111	4.74877	4.72614
ASHGA5P017657	0.02157	-2.47733	down	noncoding	ENST00000444259	RP5-1112D6.4	GENCODE	557	chr6	+	111599134	111599945		AATAAAAAACGGTGCAACGTCTTTCTTTTCTGATGGTGATTGATATAGTTTGGCTGTGTC	intergenic							31.9348	53.2742	3.80979	5.11858	5	58.5737	104.999	37.9156	13.9658	5	5	25.0243	27.261	49.7959	10.8606	73.2331	82.3147	99.6493	29.8047	2.62964	4.67474	5.25818	4.6872	3.78736	2.57053	2.61568	4.25501	4.7756
ASHGA5P022508	0.0218079	-2.73208	down	noncoding	ENST00000558174	RP11-752G15.6	GENCODE	725	chr15	+	83419334	83425958		TCTAAAAGAGACTTATCAGCAGGTTGCAGGTGAACATGGCCTTGAGGTAAATCTGTCCCT	natural antisense	ENST00000334574	FSD2	fibronectin type III and SPRY domain containing 2 [Source:HGNC Symbol;Acc:18024]	-	83424113	83474821	174	284.915	6.34477	7.79477	6.10265	340.474	418.001	283.826	126.815	26.3962	5.82831	184.555	259.142	237.006	128.048	292.765	371.173	481.473	224.799	4.29473	7.21507	7.36799	7.62293	6.80703	6.18221	4.21184	7.05639	8.11916
ASHGA5P018606	0.0219795	-2.52652	down	noncoding	ENST00000455503	RP11-126K1.6	GENCODE	618	chr1	+	151319442	151320503		AACAATAAAGTTTAGTCTACGGTCCTCAGAGCTGCCGGAAGAGAAGAATCAATGGATGAT	intronic antisense	NM_000449	RFX5	DNA-binding protein RFX5	-	151313115	151319769	44.0066	70.2977	4.36527	5.70242	5	73.9467	101.719	75.6203	25.8349	5.08092	5	59.8511	45.3236	48.799	29.1331	82.9476	98.3143	107.449	80.1169	2.62964	4.99966	5.2086	5.67098	4.56097	3.78211	2.61568	5.45449	5.55631
ASHGA5P022647	0.0220934	-2.17175	down	noncoding	ENST00000560359	CTD-3110H11.2	GENCODE	709	chr15	+	50647524	50648567		CGCTGTGAAGGGGCGTCTGGGCATGGCTTTCCCAACCTAGTAACTGCAACTTTTAGCATC	natural antisense	NM_002041	GABPB1	GA-binding protein subunit beta-1 isoform gamma 1	-	50578076	50647605	109.128	172.728	5.87521	6.99407	7.00091	202.098	247.839	165.954	75.3161	16.497	6.39154	151.926	110.903	170.284	64.869	208.805	198.431	330.282	125.523	4.48474	6.4394	6.57122	6.80157	6.03939	5.50759	4.38524	6.77253	6.90433
ASHGA5P018373	0.0221529	-1.83855	down	noncoding	ENST00000452697	XXbac-B33L19.3	GENCODE	381	chr22	+	20325665	20342955	ENST00000412656, ENST00000415376, ENST00000416405, ENST00000416615, ENST00000424410, ENST00000428139, ENST00000431488, ENST00000434390, ENST00000440673, ENST00000447720, ENST00000451257, ENST00000453273, ENST00000455288, ENST00000456322, ENST00000577456, NR_027278, NR_038388, uc002znz.1, uc002zse.2, uc011ahm.1, uc021wlu.1	ATGGAGAGAGGCCAGTCAACGTGAGGGTGGTGCAGGTGGCCCCTCTGAGGCATGAATCTA	intergenic							13.9939	25.7788	3.42645	4.30503	5	22.8742	23.5319	18.4717	13.7784	5	5.29646	17.9983	47.425	23.8781	15.0269	26.0487	13.5047	37.7133	16.855	2.62964	3.46294	3.33175	3.75286	3.76976	2.57053	4.05368	3.84047	5.62065
ASHGA5P038654	0.0221607	-4.25276	down	noncoding	ENST00000456555	AC011322.1	pseudogene	883	chr3	-	196713546	196714429	ENST00000445739	TTGAAAAAGAGCAGGCTGCTGCTGAAAACACTGTGACCAAGGAGGAATTTCAGGGTGAAT								4504.96	8601.23	10.8399	12.9283	347.962	7837.85	14324.3	6592.03	4798.13	192.886	64.5185	1882	3812.63	6126.61	3323.45	11933.4	16348.8	10415.9	8247.89	9.18645	11.8623	13.0831	12.6367	12.3351	9.04941	7.99004	10.5762	11.4487
ASHGA5P018362	0.0222952	-3.41258	down	noncoding	ENST00000452565	GS1-124K5.4	GENCODE	454	chr7	+	65958772	65960459	ENST00000445681, NM_001145712	CTGAGCCTGTGATGCCGAAGGACCTGTTCAAAGTATTTTCTGTAACTCCAACTGTAACTT	intergenic							72.3533	108.18	4.58868	6.35954	5	145.754	228.08	98.6745	46.6337	5	5	44.6845	106.262	69.9243	45.9509	118.2	154.507	155.734	106.68	2.62964	5.97324	6.45069	6.05707	5.37456	2.57053	2.61568	5.03804	6.8407
ASHGA5P023179	0.0223637	-2.64742	down	noncoding	NR_027941	COX11	RefSeq	1138	chr17	-	53029258	53046064	NR_027942	TAGAAGAAAGATTAGAAAAATTTCAACTGTAGGTGCCTTTGCAACCTATCCTGGGAGACC	exon sense-overlapping	NM_001162861	COX11	cytochrome c oxidase assembly protein COX11, mitochondrial isoform 2	-	53038566	53046064	94.7516	155.548	5.50905	6.91364	5	168.677	248.832	153.735	78.1808	16.8692	6.65526	80.0638	124.226	134.552	75.3201	193.467	194.37	240.426	126.474	2.62964	6.1893	6.57574	6.70441	6.09973	5.5423	4.46093	5.87035	7.05669
ASHGA5P034986	0.0223641	-2.33197	down	noncoding	NR_028386	LOC375196	RefSeq	1068	chr2	-	39186428	39187485		TGGAAAACTCAACTTCTGTTCGACTTGTGGATCTTCACACTCAGAAACAAATTACGTTCC	natural antisense	NM_001145451	ARHGEF33	rho guanine nucleotide exchange factor 33	+	39146503	39202590	20.3353	36.5128	3.36877	4.59033	5	35.943	60.5547	34.772	6.83689	5	5	9.57596	73.2081	32.7111	7.55975	31.9743	53.9242	43.9341	12.2784	2.62964	3.99776	4.42894	4.57016	3.0039	2.57053	2.61568	3.13358	6.2868
ASHGA5P036994	0.0224574	-1.60341	down	noncoding	ENST00000376445	RP13-401N8.1	GENCODE	320	chr20	+	25731853	25733397		CTGCAGAAAATCAAGCTTTGAGCGGGAAGCTTCGAGGAGACACAGTGTCACAATTACAAG	intergenic							7.03344	12.1996	2.57403	3.25517	5	10.1444	14.8385	6.28455	5	5	5	5	14.2294	5	5	10.9819	14.6711	20.1008	15.4142	2.62964	2.58968	2.8503	2.63081	2.3654	2.57053	2.61568	2.34018	3.82549
ASHGA5P030225	0.02277	-1.68262	down	noncoding	ENST00000558365	RP11-561C5.5	GENCODE	452	chr15	-	85858153	85873560	ENST00000558015	TGGAGCTACCACATGGTCAGGAGGAAGAGACTCACAAAGAAAGATGAAGGTTGCAGAGAG	intergenic							9.73568	17.1194	2.91249	3.6632	5	14.5113	17.1554	16.2131	7.73324	5	5	7.27242	7.99942	12.1575	6.3131	18.252	17.3244	45.0226	12.7667	2.62964	2.91908	2.99712	3.60801	3.13503	2.57053	2.61568	2.82482	3.1319
ASHGA5P028783	0.0230368	-1.56984	down	noncoding	uc001uxv.1	AK056182	UCSC_knowngene	1910	chr13	+	41707074	41810822		GCAACACAGTGAAGAAAATGATTATACAGCTTTTGTTAATATATGTTAGAGTTGGCTGCC	intronic antisense	NM_004294	MTRF1	peptide chain release factor 1, mitochondrial	-	41790515	41837713	7.83213	12.4452	2.65138	3.302	5	13.3511	14.6905	9.61548	5	5	5	5	21.7661	11.8043	5	9.63334	13.0656	13.7017	12.1452	2.62964	2.82924	2.84066	3.0197	2.3654	2.57053	2.61568	2.34018	4.42876
ASHGA5P034163	0.023343	-2.87915	down	noncoding	uc002obl.3	AL137752	UCSC_knowngene	1694	chr19	-	36238143	36244316		GATGAGAATACTGCAGCCCACAGTAGGAAAGTTATATTTTTGAATTCACGACTACCAGTA	natural antisense	NM_019104	LIN37	protein lin-37 homolog	+	36239261	36245420	61.4667	100.548	4.75398	6.27962	5	99.066	117.85	68.657	69.2076	6.11593	5	120.837	84.523	74.0781	52.6839	103.134	148.56	145.663	95.1928	2.62964	5.40873	5.4313	5.53365	5.91962	4.04522	2.61568	6.44797	6.51274
ASHGA5P042678	0.0233991	-1.86376	down	noncoding	NR_038246	LOC100507557	RefSeq	3529	chr6	+	146056004	146207721	NR_038244, NR_038245	AAAGTACACATTACCTCTCTTAATTCCCTTGCATCATCAGATATAGATACTATTTGGGAC	intronic antisense	NM_001018041	EPM2A	laforin isoform b	-	145946439	146056991	14.4052	26.5066	3.46795	4.36616	5	17.7424	29.5504	17.078	6.10227	5	8.83547	25.9334	30.1918	27.0539	13.1763	37.2198	21.6034	34.9919	21.3093	2.62964	3.1669	3.5688	3.6648	2.8853	2.57053	4.95723	4.3004	4.93263
ASHGA5P033492	0.0234353	-2.80785	down	noncoding	NR_026849	LINC00526	RefSeq	1322	chr18	-	5236722	5238028		AAGGATACTTTGACAGTTTTCATTTGTCGTCTACATGTATATGGTACGTTTCATTCTGCC	intergenic							55.3582	98.9724	4.72014	6.20961	5	86.6262	150.683	106.988	28.2051	18.6891	5	41.6739	145.437	75.2369	35.972	102.797	117.695	139.278	76.3899	2.62964	5.22712	5.80547	6.17308	4.68075	5.68918	2.61568	4.94022	7.28133
ASHGA5P026436	0.0235137	-2.6757	down	noncoding	uc001nne.1	AB231721	UCSC_knowngene	206	chr11	+	58652423	58660266	ENST00000529451	GAGCATTCCTCTGTATTATGGAAGATATCCTGAAGCTCAATGCCTGCAATAAAAGCAAGC	intergenic							35.9868	66.0533	4.06412	5.48404	5	76.98	59.6917	31.2993	53.5967	5	5	51.3265	31.4771	82.7577	14.707	70.7561	105.977	94.6503	62.0481	2.62964	5.05637	4.41021	4.41933	5.56775	2.57053	2.61568	5.24346	4.99144
ASHGA5P014810	0.023923	-2.80845	down	noncoding	ENST00000413606	RP4-717I23.3	GENCODE	770	chr1	-	93727742	93811388	ENST00000450843, ENST00000451302	CCTCAAGCAGATAACTGATACCGTGCTTCCAGAAGATTTTTCTAACAGTGTTTGCAAGCT	intronic antisense	NM_206886	CCDC18	coiled-coil domain-containing protein 18	+	93646280	93744287	35.8586	72.1499	3.80898	5.29875	5	98.3458	111.143	33.9513	14.7373	5	5	13.6912	14.7563	99.8851	18.7658	67.7369	209.985	69.5289	24.3915	2.62964	5.39606	5.34257	4.53313	3.85112	2.57053	2.61568	3.53311	3.86861
ASHGA5P040939	0.0240543	-2.6463	down	noncoding	uc011cly.2	BC013821	UCSC_knowngene	2682	chr5	+	478317	480999		CCAGGGCAAATTGTATGTGCTCCTTACTGGGTTTATTATAAGTGTCACATGTTTTTTATA	natural antisense	NM_004174	SLC9A3	sodium/hydrogen exchanger 3	-	473333	524549	127.619	409.924	6.42954	7.83352	12.7611	386.079	217.324	177.641	34.1378	38.6601	44.5965	109.755	1464.26	432.786	120.129	172.153	218.765	265.574	195.804	5.30938	7.39722	6.37514	6.90483	4.95025	6.74088	7.44884	6.30976	10.2709
ASHGA5P030466	0.0240939	-1.71244	down	noncoding	ENST00000561039	RP11-111A22.1	GENCODE	565	chr15	+	40800222	40845449	ENST00000561460	CAAGGAAGATGTTTGGAACTATCCAGGAGTAGTGTCAAACACTAACACCATATTTACAAG	natural antisense	NM_001080791	C15orf57	uncharacterized protein C15orf57 isoform b	-	40845297	40857252	8.18148	15.8623	2.80776	3.58382	5	5	14.8058	6.15927	7.34096	5	5	17.1458	24.5046	5	9.24683	17.0135	27.4793	19.7787	8.01289	2.62964	2.32168	2.84835	2.61785	3.07941	2.57053	2.61568	3.77895	4.61235
ASHGA5P029672	0.0241503	-1.59267	down	noncoding	TCONS_00008338	XLOC_003787	LincRNAs identified by Cabili et al	403	chr4	+	175445331	175448018		TGAGGTCAAAGTGCAATGAGTCAAGGATAGTGACAACTGGAAGAACAGGAAGCAGTTTGG	intergenic							5.37015	11.3804	2.52521	3.19665	5	6.84123	5	5.87734	5.24264	5	5	5	18.4672	8.72076	5	5	11.2296	22.5988	8.64664	2.62964	2.38992	2.32183	2.58672	2.74718	2.57053	2.61568	2.34018	4.18881
ASHGA5P037416	0.0242461	-2.97575	down	noncoding	NR_001458	MIR155HG	RefSeq	1500	chr21	+	26934456	26947480	ENST00000456917	CAACTCTTCTCAACATTTTGTCCAGGTTATTCACTGTAACCAAATAAATCTCATGAGTCT	intergenic							116.079	264.166	6.05659	7.62984	5	168.943	300.014	194.275	83.0206	57.5042	16.7488	103.126	425.898	193.761	106.329	274.823	244.372	406.929	197.051	2.62964	6.19143	6.86351	7.04402	6.18498	7.31726	5.99528	6.22661	8.76427
ASHGA5P042386	0.0245327	-3.821	down	noncoding	NR_037178	LOC100294145	RefSeq	3591	chr6	+	32861952	32871535	NR_037177	TGTATATAGTATGGTTCTGGATGCTCTTGTATACCTCACTCTTCATTTCTCACCTAACCC	intergenic							85.6863	164.264	4.83382	6.76777	5	139.369	237.359	139.566	67.4307	5	5	86.7655	78.6663	133.415	48.9948	237.746	267.956	316.961	66.1083	2.62964	5.90572	6.51324	6.56931	5.88273	2.57053	2.61568	5.98369	6.40357
ASHGA5P050485	0.0245331	-2.42268	down	noncoding	ENST00000417691	AC016747.3	GENCODE	892	chr2	-	61370689	61372087		ATATATTCCATAGACTGCATTGGAGAGAAAGGCGCCGGGACAGAAAAGCCTGAGATAAAC	bidirectional	NM_001143960	C2orf74	uncharacterized protein C2orf74 isoform 2	+	61372242	61391964	59.3854	99.2649	4.81422	6.09082	5	113.687	178.605	96.0437	31.0397	5.71223	7.4067	37.588	47.982	53.6884	35.6669	146.203	206.046	123.518	81.7511	2.62964	5.59811	6.07307	6.01384	4.81143	3.94505	4.64532	4.79733	5.63785
ASHGA5P015153	0.0247418	-1.55562	down	noncoding	ENST00000417355	AC114803.3	GENCODE	311	chr2	+	220163723	220168852		GAGGACAAAGGGACCACTGCAGTGCTGGGTACAGAGAGGACACCAGAGCATCTGAGACAA	natural antisense	NM_001199763	PTPRN	receptor-type tyrosine-protein phosphatase-like N isoform 2 precursor	-	220154344	220174295	7.18296	12.8473	2.73064	3.36813	5	12.0722	5	8.10947	5.12141	5	5	12.1606	10.7312	11.8156	5.4278	13.3377	7.29327	32.5023	8.82295	2.62964	2.73297	2.32183	2.84625	2.72628	2.57053	2.61568	3.40197	3.4734
ASHGA5P018245	0.0247794	-2.1766	down	noncoding	ENST00000451161	RP3-400N23.6	GENCODE	422	chr22	+	31731334	31734007		TGAGTAGCAGAACTGTAAGAGAAAGCAACATTCACCTTTGTGTCACAGATCAAATGGTAA	intronic antisense	NM_014323	PATZ1	POZ-, AT hook-, and zinc finger-containing protein 1 long C isoform	-	31721789	31742249	29.8398	42.428	3.74799	4.87006	5	43.9757	106.031	36.4341	16.3039	5	5	20.9742	26.8073	52.9361	11.0099	54.4826	73.5579	54.4939	23.7082	2.62964	4.26749	5.27127	4.63463	3.96571	2.57053	2.61568	4.02893	4.74958
ASHGA5P016972	0.0249378	-1.67882	down	noncoding	ENST00000436112	RP3-523C21.1	GENCODE	512	chr6	+	132481903	132490501		AAACAACCAGTTCAACCAATCTACAAAGGCCAAAAATATTTTCACAGGCCCCCAAAAGAT	intergenic							10.2543	17.2264	2.9983	3.74575	5	11.3394	16.4671	11.7824	13.0871	5	5	14.3584	5.7488	13.1759	16.1707	21.72	14.6106	35.2934	13.8657	2.62964	2.6752	2.95261	3.24589	3.71265	2.57053	2.61568	3.58415	2.76549
ASHGA5P019693	0.0249443	-3.14792	down	noncoding	uc003idi.4	AF085995	UCSC_knowngene	456	chr4	+	120433527	120473183		CCAAATGCCTTACTTGACAGGATCACAGAATGTGAATTTTGAACAGATCTGAAAAGTTAT	intronic antisense	NM_001083	PDE5A	cGMP-specific 3',5'-cyclic phosphodiesterase isoform 1	-	120415549	120549981	77.9407	131.473	5.0049	6.6593	5	184.764	157.437	113.882	65.593	8.7622	5	83.0882	145.709	121.795	89.6792	102.021	100.441	253.694	106.974	2.62964	6.3138	5.87851	6.25708	5.842	4.58355	2.61568	5.9189	7.28371
ASHGA5P033454	0.0252768	-1.78426	down	noncoding	ENST00000574856	AC139099.6	GENCODE	439	chr17	+	81168194	81168959	ENST00000431321, ENST00000438217, ENST00000453935	GTGGAGTGAGAACGTTGCAGCAGGAGAGAACAACGCAGCAAAGCACAGCAGGGGAACCGG	intergenic							5.9462	13.3833	2.50809	3.34341	5	6.42479	9.90408	6.24071	5	5	5	5	26.375	6.03619	5.48405	13.6497	5	30.3071	6.83112	2.62964	2.37591	2.54115	2.6262	2.3654	2.57053	2.61568	2.34018	4.72352
ASHGA5P037609	0.0255117	-1.96643	down	noncoding	ENST00000417194	GUSBP11	GENCODE	5004	chr22	-	24000280	24035372		ATCCCTGATGGCAGTTTTGTGGAGAGGCGCAAAACTTTATGTGGTAAGAAATGAGCTGTA	natural antisense	NM_153615	RGL4	ral-GDS-related protein precursor	+	24033047	24041363	83.6403	163.945	5.76084	6.73642	11.6266	116.181	326.003	61.0211	65.5932	20.2865	17.1738	51.2366	163.857	157.213	30.5178	165.381	390.51	169.436	70.702	5.18742	5.62917	6.98736	5.36132	5.84229	5.80216	6.03556	5.24145	7.46743
ASHGA5P018503	0.0255601	-1.93188	down	noncoding	ENST00000559650	HERC2P2	pseudogene	4993	chr15	-	23293372	23356223	ENST00000560464, ENST00000569226, NR_002824, NR_036443, uc001yvo.4, uc001yvp.4, uc001yvq.2, uc010uao.1	GTTGTGAAAGGTGTGATGGATGTCAGATGTTTCCTATCAATGGATCCAGATTCAAATGCA								25.7005	34.9245	3.7119	4.6619	5	45.724	96.7034	24.1755	9.76027	6.12095	5	13.1199	41.2469	38.9513	10.8097	40.7707	58.3828	33.0895	21.2202	2.62964	4.32401	5.13097	4.07593	3.38774	4.04625	2.61568	3.48497	5.41617
ASHGA5P022767	0.0258216	-2.3742	down	noncoding	ENST00000562423	RP11-578F21.12	GENCODE	731	chr15	+	29034972	29053444	NR_037599	TACTCGTTCCTCAGCAAGTTGGCAAAACAGATATCATGCTGGCAATTGAAAAGCTGCAGG	intergenic							389.551	576.459	7.50645	8.75389	24.2673	818.321	1247.77	492.053	316.735	40.2845	17.9161	159.06	828.359	401.254	198.325	734.195	927.639	593.054	352.384	6.13178	8.48416	9.0892	8.42751	8.1776	6.80189	6.10205	6.83737	9.58884
ASHGA5P029429	0.0261092	-2.09616	down	noncoding	ENST00000556624	RP11-219E7.1	GENCODE	294	chr14	+	21252046	21252452		GGAAAGGGGTTGAATGGATTTATATGAACATTACCTGGAAATTGCCAGAGATTCTTAAAG	intergenic							68.5766	142.548	5.65867	6.72642	5.7259	114.646	110.735	91.916	86.7641	36.1484	10.2575	92.4199	275.959	62.3527	104.458	138.072	186.432	105.828	124.732	4.20401	5.61185	5.33667	5.94849	6.25029	6.64052	5.21126	6.06626	8.20031
ASHGA5P019710	0.0262074	-1.55055	down	noncoding	ENST00000556904	AC068831.10	GENCODE	563	chr15	+	91565848	91573936	ENST00000501381	TTCTCAAGTCAGCTCCAGGTTCAAGCTCAAAGGCCTAAAGTTTTGCAAACATCTGGTGAA	bidirectional	NM_018668	VPS33B	vacuolar protein sorting-associated protein 33B	-	91541773	91565833	11.1452	15.795	3.04175	3.67453	5	17.0928	21.6536	14.8081	9.19876	5	5	11.408	15.3291	5.58557	10.4244	19.0085	18.0127	24.6015	17.6035	2.62964	3.12094	3.23949	3.50446	3.3231	2.57053	2.61568	3.33016	3.92497
ASHGA5P051677	0.0262531	-4.55815	down	noncoding	ENST00000273411	RPL39P5	GENCODE	449	chr3	-	134070693	134075403		TGTTTGGCTCCGCCTCTCTCCATGTCTTCTCACAAGACTTTCAAGATTAAGCAATTCCTG	exon sense-overlapping	NM_016201	AMOTL2	angiomotin-like protein 2	-	134074189	134093406	2769.04	5442.47	10.0448	12.2332	53.1516	4811.22	5448.52	5128.41	2575.54	116.748	33.9234	3984.8	4008.91	4459.93	1537.57	8649.06	6602.48	7053.54	5785.78	7.06279	11.1013	11.4751	12.1897	11.3355	8.34831	7.06232	11.7832	11.5138
ASHGA5P019017	0.0263377	-2.97722	down	noncoding	NR_024127	SNHG12	RefSeq	758	chr1	-	28905049	28908366	ENST00000464612, ENST00000481220, ENST00000488745, uc001bql.3, uc001bqm.3, uc001bqn.3, uc001bqo.3	GTGCTTTAAGATTCATGTTACATGTAAAGCTGTCCTCATTTGTGACTATGGACCTATGGA	natural antisense	NM_017846	TRNAU1AP	tRNA selenocysteine 1-associated protein 1	+	28879528	28905057	525.606	846.17	7.76587	9.33983	14.783	1024.86	1683.71	739.37	343.018	61.934	12.7149	324.461	1305.09	531.044	312.073	897.585	1131.74	1138.18	607.473	5.50952	8.82011	9.54175	9.09561	8.29318	7.42042	5.56431	7.88202	10.1321
ASHGA5P027588	0.026347	-2.67445	down	noncoding	uc001tsv.2	C12orf47	UCSC_knowngene	932	chr12	-	112277572	112279710	NR_015404	ACCTACACTGCATTCCTCAAAGTAAAATTTAAGTGTGGCTCTGTGCCTATGCTCTCCCCA	bidirectional	NM_003668	MAPKAPK5	MAP kinase-activated protein kinase 5 isoform 1	+	112280278	112331228	255	385.995	6.80237	8.22161	7.63885	504.859	689.149	396.342	185.928	28.8345	8.11286	219.138	291.38	381.195	142.133	461.907	584.617	558.402	282.331	4.61115	7.78063	8.1216	8.11605	7.36183	6.31625	4.80837	7.3031	8.27368
ASHGA5P042309	0.0264127	-2.54601	down	noncoding	NR_038929	LOC100131289	RefSeq	828	chr6	+	27729522	27730966	TCONS_00011277	CAGGAGATTGATGCATCCCAGTTTACTCTTTTTGGCATATGTTTTTACTCATAAATTAGG	intergenic							33.8062	61.8369	3.95943	5.30767	5	49.0907	136.328	38.7524	11.9468	6.90353	5	17.4283	102.487	43.1011	13.8173	48.4625	115.181	89.3571	20.4519	2.62964	4.4253	5.65488	4.71805	3.61683	4.21771	2.61568	3.79737	6.78951
ASHGA5P046081	0.0267335	-4.27511	down	noncoding	uc011mfp.1	AK127309	UCSC_knowngene	3067	chrUn_gl000219	-	51811	54878		CCACATAAAAGGAAGGGACCAAAAATATCTTAAAGAAATACTTCACGATGGAAGTGATGT	intergenic							161.82	332.778	5.80667	7.90263	5	265.107	514.921	188.515	57.4142	37.5244	5	221.081	283.048	364.731	119.835	287.106	213.109	804.358	257.261	2.62964	6.86029	7.67618	6.99687	5.6567	6.69679	2.61568	7.32121	8.22976
ASHGA5P051492	0.0267568	-2.43957	down	noncoding	uc001ejn.1	BC070106	UCSC_knowngene	1888	chr1	-	143424332	143467651	ENST00000416067, ENST00000443766, NR_037871, NR_037872, NR_038328, NR_038329, NR_046439, NR_046440, NR_046441, NR_046442, uc003jaj.2	CTCCGGAAGTGCGGATCCCAGCGGTGGTCGTGTAGCTGAGCAGGCCTGGGGCTTGGTTCT	intergenic							12.9627	38.7615	3.18146	4.46809	5	18.6591	18.8162	9.45438	20.009	5	5	21.7631	111.375	11.1588	8.16636	55.8768	38.3294	36.9503	9.4738	2.62964	3.22854	3.09651	3.00488	4.2317	2.57053	2.61568	4.0742	6.91031
ASHGA5P053411	0.0267948	-5.9415	down	noncoding	ENST00000464216	RP11-17A4.1	GENCODE	403	chr8	+	57500943	57501346		CAGAAGCGAGATGATGAAGGGAACGTCATCATTTGGAAAGCATTGCAATAAGACGTACAC	intergenic							776.993	1559.87	7.68227	10.2531	5.27119	1376.64	1462.43	1723.17	632.589	17.1388	5.42568	993.275	746.138	1176.75	539.628	2680.6	2333.88	1988.97	1453.15	4.08896	9.25787	9.33438	10.3595	9.17033	5.56153	4.09427	9.59132	9.46244
ASHGA5P048954	0.0268842	-2.43404	down	noncoding	ENST00000544386	Z97634.5	GENCODE	661	chr16	+	436662	437323	ENST00000457760	TTTTCACAAGATGGCGCTGAAAGCAAAGAAGGAAGCTCCTGCCTCTCCTGAAGCCGAAGC	natural antisense	ENST00000427313	TMEM8A	transmembrane protein 8A [Source:HGNC Symbol;Acc:17205]	-	426805	436999	1505.68	3028.47	9.88326	11.1666	471.638	3236.86	3399.5	2268.57	1251.8	184.698	87.283	1145.12	733.789	2169.15	858.96	4932.13	5483.85	4563.89	2457.5	9.54053	10.531	10.7189	10.8257	10.2421	8.98856	8.4032	9.8162	9.44027
ASHGA5P047177	0.0269834	-1.74435	down	noncoding	ENST00000441365	RP11-288G11.3	GENCODE	475	chr10	-	134596682	134598269		CCGGTCCAGGAACTCTGTAGTGTTCTAAAGTAAAATCAATAAAACATACATTTGTGTTTC	natural antisense	NM_005539	INPP5A	type I inositol 1,4,5-trisphosphate 5-phosphatase	+	134351352	134596984	14.8526	21.9569	3.29103	4.09372	5	27.5202	23.9364	19.7482	13.3623	5	5	19.254	37.2792	16.1867	8.95199	18.8019	25.9149	26.7177	19.8457	2.62964	3.67547	3.34886	3.82712	3.73779	2.57053	2.61568	3.92311	5.25667
ASHGA5P000067	0.0270103	-2.09461	down	noncoding	AL080072		NRED	1322	chr1	+	92654807	92656269		TTGCATTCTAACAGGTTATGATGAATGGAAAGCTGATGGTTCCTGGTTGGAAAAAAGATA	intergenic							30.9522	46.3901	4.12443	5.19111	5	41.8985	64.6787	53.3416	20.9082	7.70204	5	49.0887	69.039	37.301	28.9223	52.2918	45.0448	54.6228	37.5092	2.62964	4.2036	4.52195	5.16723	4.2877	4.39095	2.61568	5.17865	6.19651
ASHGA5P021075	0.0270369	-1.68488	down	noncoding	ENST00000524488	RP11-430H10.1	GENCODE	361	chr11	+	45377050	45378204		CGGCTAGCCGGGTGCAGCAGAAGTCTCAGGTAGCTGAGAAGTTCATGGAATCTTCTTATT	intergenic							9.5655	16.7562	2.78072	3.53336	5	13.2191	17.6415	20.6634	5	5	5	5	6.62009	6.93319	10.5072	32.8605	29.549	25.0664	5.75725	2.62964	2.8197	3.02578	3.87881	2.3654	2.57053	2.61568	2.34018	2.91323
ASHGA5P053393	0.0270375	-3.6548	down	noncoding	ENST00000434796	GAS5	GENCODE	575	chr1	-	173833117	173834039	ENST00000422183, ENST00000456812	CTGATATTCTGCATTCCCATGTAGCATTTTAATTGAAGTCTGTAAATGTGGCTAAAAGTC	intergenic							119.86	200.658	5.24431	7.1141	5	172.131	463.978	145.029	83.2706	7.47282	5	77.001	180.059	195.829	46.5438	249.37	364.033	281.151	87.6168	2.62964	6.22106	7.51349	6.62465	6.18983	4.34302	2.61568	5.81711	7.60286
ASHGA5P019770	0.02707	-2.22669	down	noncoding	ENST00000502881	AC115115.2	GENCODE	424	chr2	+	113089718	113091836		AGGAGTTCTGTTCTGTGCTAAAATGGGGTTGTGGTTAAGTGAACGAGAACTCTGCCTACC	exon sense-overlapping	NM_198581	ZC3H6	zinc finger CCCH domain-containing protein 6	+	113033177	113097640	29.4139	44.8353	3.82897	4.98388	5	51.801	76.5898	39.5288	18.5405	5	5	33.8513	35.3307	34.1924	11.964	55.9433	63.0865	80.3836	32.947	2.62964	4.50037	4.77887	4.74569	4.13443	2.57053	2.61568	4.65659	5.17004
ASHGA5P056294	0.0272782	-2.71312	down	noncoding	TCONS_00001898	XLOC_001286	LincRNAs identified by Cabili et al	1334	chr1	-	244210525	244212010		ACAAAGACGTGGAAATGTCTGCCGTCAAGAAATTGGAAATCGTATCGAGAACCCAGACTG	intergenic							66.8939	113.44	4.95235	6.3923	5	125.257	153.941	96.4148	57.0508	14.0152	5	78.4731	105.859	105.369	38.6149	142.661	203.49	117.725	80.3619	2.62964	5.74798	5.84148	6.01972	5.64797	5.27432	2.61568	5.842	6.83737
ASHGA5P018100	0.0274428	-2.20573	down	noncoding	ENST00000449448	AC007092.1	GENCODE	682	chr2	+	58655519	59231127		CCCTGGCCGGGGACTTACCAATTTGGGATTCTTCCAGGAGCTGAAAACTGATTGCAAATA	intergenic							21.9988	34.8807	3.61635	4.75761	5	23.3348	14.4289	34.529	32.6022	5	5	56.0957	26.6412	38.6368	21.4505	34.2923	51.5809	31.5661	39.9968	2.62964	3.48535	2.82133	4.56117	4.88281	2.57053	2.61568	5.36427	4.73881
ASHGA5P043693	0.0274745	-3.27043	down	noncoding	uc003tsz.3	AK123141	UCSC_knowngene	3644	chr7	+	63813368	63817012		AGAATTAATATTACCCAACTTGTCCAATAAAATGTTTTTAAGTTGCCTATTTTTAAAAAA	intergenic							96.4245	166.876	5.25784	6.96732	5	141.555	238.519	221.422	41.5787	19.3754	5	98.9459	156.386	138.078	59.1446	228.883	199.832	270.502	115.308	2.62964	5.9304	6.51855	7.23822	5.22559	5.74042	2.61568	6.16421	7.39655
ASHGA5P033294	0.0276207	-2.3185	down	noncoding	NR_046273	LOC729683	RefSeq	2348	chr17	+	61777697	61780045		GGAACTTTTTAGCTCCAAAGTGGTTTGATGACCACAGGCTAAAATTCATAGTCTTAAAAT	natural antisense	ENST00000578402	LIMD2	LIM domain containing 2 [Source:HGNC Symbol;Acc:28142]	-	61775175	61778045	424.522	783.931	8.07236	9.28555	13.9387	629.807	1266.61	568.58	323.364	199.979	67.9882	325.912	1041.61	541.864	343.876	769.303	1113.5	957.915	719.451	5.42933	8.11242	9.11344	8.6663	8.20551	9.10109	8.06383	7.88696	9.87331
ASHGA5P019716	0.0276273	-2.33834	down	noncoding	NR_039994	TMEM161B-AS1	RefSeq	689	chr5	+	87564840	87732491	ENST00000501715, ENST00000504769, ENST00000506584, ENST00000512724	TGTCTGAGAGTTTAAACTTGATTTTGTGAGGGGACGAACAGCGTGACAATTAAAAGAAGA	bidirectional	NM_153354	TMEM161B	transmembrane protein 161B	-	87491022	87564665	35.2349	58.3658	4.14739	5.37288	5	56.8949	113.406	47.8229	20.6913	7.5644	5	25.4998	67.8108	37.3095	14.9297	48.8327	93.3197	87.3581	59.0003	2.62964	4.6287	5.37266	5.01601	4.27254	4.36369	2.61568	4.28021	6.17323
ASHGA5P036857	0.0276582	-1.90778	down	noncoding	ENST00000417346	RP4-800J21.3	GENCODE	1540	chr20	-	55959215	55968118		TGGGATTCATAAGAGGAGGAAGAAACCTATCATGCTGACGGGTAGTGAAGAAGAGAAATG	natural antisense	NM_017495	RBM38	RNA-binding protein 38 isoform a	+	55966453	55984386	25.0547	34.1493	3.69514	4.62703	5	40.3866	92.941	26.0864	15.3391	5.03293	5	10.6513	22.5492	24.2319	11.5234	44.538	58.5314	45.4652	32.2057	2.62964	4.1564	5.07007	4.1722	3.89399	3.76931	2.61568	3.25382	4.48722
ASHGA5P022945	0.0277168	-1.77773	down	noncoding	ENST00000566140	CTD-2319I12.1	GENCODE	447	chr17	-	58160926	58165654		TTCAGTCTAGATGAAGAGTTATCTTAAGGATCATCTTTCCCTAAGATCGTCATCCCTTCC	intergenic							19.9028	25.1142	3.45958	4.28962	5	33.3333	56.8119	21.6155	16.9784	5	5	15.4832	19.5143	17.1538	13.5153	27.3954	32.8246	31.672	33.7241	2.62964	3.90794	4.34254	3.92986	4.01398	2.57053	2.61568	3.66649	4.27306
ASHGA5P017713	0.0281359	-6.49252	down	noncoding	NR_036693	CLEC2D	RefSeq	5255	chr12	+	9822303	9852151		TATCTAAGAGGTTTCCTATCCTGGGAGCAGGAGAGTGTGCCTATTTGAATGACAAAGGTG	exon sense-overlapping	NM_001004419	CLEC2D	C-type lectin domain family 2 member D isoform 2	+	9822303	9852151	383.33	944.685	6.53186	9.23064	5	571.622	1240.85	669.637	204.637	16.391	5	353.509	285.051	495.143	204.068	1193.79	1374.92	2521.8	538.013	2.62964	7.97958	9.08068	8.94938	7.49789	5.49765	2.61568	8.0044	8.24119
ASHGA5P043140	0.0281417	-2.37867	down	noncoding	uc003uca.4	PMS2L14	UCSC_knowngene	522	chr7	-	74702862	74712617	ENST00000412466, ENST00000414507, ENST00000418756, ENST00000430602, ENST00000441237, ENST00000451831, ENST00000529061, NM_000535, NR_003085, NR_003613, NR_003614, NR_022007, NR_023383, NR_027775, NR_027776, NR_027777, NR_028058, NR_028059, NR_046297, NR_046299, uc003tvo.2, uc003tvs.4, uc003txh.4, uc003txn.4, uc003ubz.1, uc003uch.1, uc003ucm.3, uc003uco.1, uc003ucq.3, uc003udq.3, uc003uui.2, uc010…	AAGCAGTTATTTTCTACGCTACCTGTGCGCCATAAGGAATTTCAAAGGAATATTAAGAAG	intergenic							433.018	608.006	7.65231	8.90247	13.8201	973.848	1322.37	524.042	264.527	57.7673	22.6173	285.158	684.455	489.825	235.871	795.035	805.164	775.262	470.428	5.42025	8.74261	9.18024	8.52082	7.88841	7.32402	6.44474	7.6974	9.36897
ASHGA5P032539	0.0283767	-2.13722	down	noncoding	ENST00000446962	RP11-338C15.3	GENCODE	473	chr1	-	212827340	212838776		TTGTATCTGTAATGGTGGAGTCTCAGGCATTGACTTCCCAGGTGAAGGAAGGGTGATTTT	intergenic							18.7689	32.1652	3.48239	4.57812	5	17.3324	14.9672	25.2299	31.317	5	5	46.3046	17.3442	40.5477	25.4407	48.1055	30.0051	21.1546	42.5585	2.62964	3.13815	2.85669	4.1314	4.8251	2.57053	2.61568	5.0919	4.0968
ASHGA5P041583	0.0287364	-1.64563	down	noncoding	ENST00000507072	RP11-423H2.3	GENCODE	551	chr5	+	177378413	177390961		TTGAAATGAAAACCACAACAAAACCCATGACTGGAAGCCATCCCCGATAAGTCTTCTGCG	intergenic							22.8437	35.6742	4.10437	4.82301	5	48.9875	35.1414	35.2546	20.0176	9.95971	6.26302	22.1256	35.0888	25.6686	26.5391	48.484	39.368	40.4836	34.0873	2.62964	4.42276	3.75077	4.59089	4.23199	4.76904	4.34522	4.09463	5.15953
ASHGA5P030071	0.0287614	-2.01848	down	noncoding	TCONS_00008016	XLOC_003481	LincRNAs identified by Cabili et al	229	chr4	+	26784348	26784724		CCTTGTGACAACAAAAGACAACTCAAATCAGCTTCAAGCATGGATCATAACTAACCGCGG	intergenic							25.0639	50.1118	4.16024	5.17352	5	31.7937	63.156	40.8882	26.3383	9.97891	6.41039	16.9458	97.4448	40.7848	17.5003	47.4779	41.6744	76.0581	29.842	2.62964	3.85192	4.48772	4.79561	4.58667	4.77341	4.39154	3.76543	6.72316
ASHGA5P033254	0.029118	-2.09391	down	noncoding	AA158161		LincRNAs identified by Khalil et al	452	chr11	+	37649936	37650185	NM_005898	ACCGCCCTTTTCAATTGCTATCTTTTGAAAGGCACCAGTATGTGTTTTAGATTGATTTCC	intergenic							451.959	830.579	8.16555	9.23175	26.679	766.483	1202.51	541.118	344.061	157.884	42.2566	534.682	1248.45	707.706	188.127	1120.45	1361.42	659.907	527.986	6.24213	8.39948	9.03622	8.57717	8.29668	8.76965	7.38216	8.62095	10.0709
ASHGA5P044006	0.029402	-3.42475	down	noncoding	uc003wgl.2	BC045757	UCSC_knowngene	1870	chr7	+	149535478	149537348		TTTCCAAGCTATTCTGTTCAGTCAGAGGCTTTCTTAGCCTTTAACGGGAGAAGAGAAATA	exon sense-overlapping	NM_001099220	ZNF862	zinc finger protein 862	+	149535508	149564568	976.257	1672.43	8.58098	10.357	20.9608	1719.49	2823.96	1311.46	868.29	62.1528	17.8523	985.893	1714.22	1415.24	448.605	2058.92	2642.02	2207.4	1220.61	5.95507	9.55202	10.4048	9.96348	9.67624	7.42492	6.09701	9.57432	10.482
ASHGA5P057251	0.0294103	-4.02089	down	noncoding	TCONS_00014987	XLOC_007067	LincRNAs identified by Cabili et al	240	chr8	-	41041412	41042272		AAGCTGCCTGCTGCTGCCACAGGTCAACACCGTCACCACTCAACTGATATCTTACTGCTT	intergenic							4462.95	10087.7	10.9228	12.9303	203.067	7054.86	14055.7	7958.26	4298.43	315.315	111.222	1706.72	11440.5	6963.45	1146.67	13578.8	15983.8	15669.4	5831.17	8.6264	11.7066	13.0496	12.9494	12.172	9.70799	8.73657	10.4337	12.6072
ASHGA5P036124	0.0294128	-3.90416	down	noncoding	TCONS_00027274	XLOC_013283	LincRNAs identified by Cabili et al	1067	chr19	-	28262961	28264517		CTAAATGCGATGCATGCAGTCGACATCCATCTCAAAATAAATGAACCAACAGTAAATATA	intergenic							130.349	267.979	5.64299	7.608	5	111.426	371.901	188.297	189.934	23.5919	5	147.646	295.587	173.651	65.5965	328.747	313.456	316.839	381.978	2.62964	5.57111	7.1801	6.99437	7.39523	6.0262	2.61568	6.7316	8.29053
ASHGA5P028217	0.0294141	-3.39892	down	noncoding	ENST00000552735	RP11-486A14.1	pseudogene	133	chr12	+	93709346	93709479	NM_001256706, NM_001256707, NM_001256708, NM_001256709, NM_001256710, NM_001256711, NM_001256712, NM_014885, NR_046345	GAGCTCCAGTGGTAAATTTCCTAGATGTACAACTATTGATTTCATGATGTATTGTTCCAT								153.832	264.052	5.86955	7.63463	5	213.237	351.767	313.471	101.174	7.43963	7.90447	230.663	247.46	192.565	90.4266	304.853	316.905	457.01	239.146	2.62964	6.52353	7.09516	7.77199	6.46631	4.33399	4.75697	7.37881	8.05217
ASHGA5P043615	0.0294368	-2.7499	down	noncoding	uc003teu.3	DQ594967	UCSC_knowngene	3677	chr7	+	35734847	35738524		GAACTGGAAATGTCAAAGAACAATTGCCCAGCTCAGTTACCATCTGCTACTAAAGATAGC	bidirectional	NM_022373	HERPUD2	homocysteine-responsive endoplasmic reticulum-resident ubiquitin-like domain member 2 protein	-	35672269	35734772	47.9823	78.4397	4.26894	5.72832	5	64.4974	139.744	84.039	31.8765	5	5	48.7021	50.0487	53.0793	26.5004	86.8342	171.643	122.078	38.8942	2.62964	4.80947	5.68899	5.8198	4.85169	2.57053	2.61568	5.1657	5.70541
ASHGA5P019569	0.0296623	-2.83269	down	noncoding	ENST00000492937	TIPARP-AS1	GENCODE	441	chr3	-	156389650	156392167		ACCCGTTTCGAGTAATAACAGGATGGAGATGGAGTTTCATGACAAAAATGAAGGTGAATA	intronic antisense	ENST00000486483	TIPARP	TCDD-inducible poly(ADP-ribose) polymerase [Source:HGNC Symbol;Acc:23696]	+	156391023	156422928	58.5066	95.2851	4.63442	6.13659	5	103.26	142.671	105.321	31.9796	5.847	5	68.9749	114.168	51.1563	34.7551	98.7425	94.8498	157.158	116.166	2.62964	5.46468	5.72057	6.15174	4.8559	3.97596	2.61568	5.66121	6.94368
ASHGA5P053108	0.0297834	-2.52483	down	noncoding	ENST00000415772	SBDSP1	pseudogene	733	chr7	+	72300068	72304585	ENST00000437201	CTGATCAAGGTCATAGAAAGTAAAGATTATGGCCAACAGTTAGAAATCGTAAGAGTCAAA								40.8853	81.3128	4.34354	5.67972	5	49.372	152.701	52.4413	21.5154	17.8817	5	23.1718	48.1068	102.106	15.724	144.235	129.162	103.663	26.1929	2.62964	4.43339	5.82799	5.14435	4.32244	5.62234	2.61568	4.15246	5.64172
ASHGA5P018040	0.029943	-3.7145	down	noncoding	ENST00000448680	RP4-666F24.3	GENCODE	491	chr1	+	115642292	115645279		CAAACTCAAAAGGTTTTTCATGGCAGCATGTGACAAGATGATGCTGAAAAATTTATATGG	intergenic							341.28	725.181	7.16143	9.05459	5.84115	630.712	481.276	458.146	496.553	56.9927	5.55102	595.169	1474.69	381.481	294.484	647.456	955.948	714.396	607.814	4.23272	8.11454	7.56633	8.32859	8.82105	7.30803	4.13224	8.78793	10.2803
ASHGA5P041934	0.0300252	-2.33547	down	noncoding	ENST00000431043	SNHG5	GENCODE	998	chr6	-	86386845	86388451		CTTTTACATATGTTGTAATGTTTGTAGTCTTGTAAGAATCTCGTGTTTTTCCTTTTCTAG	intergenic							47.3369	74.5221	4.52404	5.74775	5	76.3424	144.527	66.5285	33.529	11.613	5	36.1553	59.7824	76.3961	21.2196	111.667	97.284	106.416	48.8889	2.62964	5.04428	5.7393	5.48948	4.92355	5.00403	2.61568	4.74635	5.98658
ASHGA5P033158	0.0304379	-1.79131	down	noncoding	ENST00000572634	KANSL1-AS1	GENCODE	666	chr17	+	44273423	44274089		TCCAATATCCACTCTATTCTGATTAGTTTTAACCCATTCTCTTTGCCAATGATTGGTTAG	intronic antisense	NM_001193465	KANSL1	KAT8 regulatory NSL complex subunit 1 isoform 2	-	44107281	44302740	17.0978	18.909	3.03132	3.87233	5	18.2566	80.5652	8.82368	5	5	5	9.13686	16.5402	15.0742	8.90797	20.873	22.8381	36.9103	11.2191	2.62964	3.20176	4.85993	2.92728	2.3654	2.57053	2.61568	3.08033	4.02682
ASHGA5P025970	0.0304803	-1.83623	down	noncoding	NR_047616	UTY	RefSeq	5805	chrY	-	15360258	15592550		ATAACAAAAAGAAATCTTCTAACCCATGTTGGGCATACCATTCTGGGCATGAATACAGTA	exon sense-overlapping	NM_001258249	UTY	histone demethylase UTY isoform 4	-	15360258	15592550	9.34137	17.7878	2.69323	3.56998	5	10.4872	31.861	7.38275	5	5	5	5	5.19101	18.6428	28.2373	24.3767	29.5401	13.5265	5	2.62964	2.61462	3.65145	2.75834	2.3654	2.57053	2.61568	2.34018	2.6767
ASHGA5P019667	0.030549	-3.11062	down	noncoding	ENST00000499326	CTD-3110H11.2	GENCODE	717	chr15	+	50647749	50648633		CACCTCAGAGGGGCGTCTGGGCATGGCTTTCCCAACCTAGTAACTGCAACTTTTAGCATC	bidirectional	NM_002041	GABPB1	GA-binding protein subunit beta-1 isoform gamma 1	-	50578076	50647605	90.5	147.871	5.14602	6.78322	5	167.448	186.241	183.872	58.5339	9.24993	5	108.654	91.3494	136.75	62.6409	170.493	174.345	286.65	112.865	2.62964	6.17964	6.13395	6.96037	5.68295	4.67028	2.61568	6.29567	6.62988
ASHGA5P004954	0.0306323	-3.01396	down	noncoding	NR_028491	TMEM41B	RefSeq	1654	chr11	-	9302200	9336315		GGATTAACAGCTGCGACTTTAGGTGGGGTATATTTTCTTCTCCTAAGAGAATAGACAGTT	exon sense-overlapping	NM_001165030	TMEM41B	transmembrane protein 41B isoform 2	-	9316638	9336315	111.325	184.788	5.4118	7.00347	6.06609	259.089	310.656	150.451	79.9078	6.37873	5	73.0471	107.66	151.11	40.864	280.05	270.398	301.576	141.862	4.28395	6.82159	6.92548	6.67205	6.1299	4.10463	2.61568	5.74113	6.86029
ASHGA5P019084	0.0306434	-2.09457	down	noncoding	ENST00000467484	RP11-293A21.1	GENCODE	482	chr4	-	26861427	26862221		GAAAACAGCAGCGTCCCCGTAATTTCAATATAGGTACATTTACCTGAACTCATCACCTTC	bidirectional	NM_001169117	STIM2	stromal interaction molecule 2 isoform 3 precursor	+	26862312	27027003	31.8926	48.8983	4.16271	5.22936	5	73.4669	36.505	38.7094	24.4494	8.45516	5	63.5552	50.0768	62.4066	20.4601	47.216	63.0823	48.8672	50.1791	2.62964	4.99144	3.79205	4.71641	4.48296	4.53369	2.61568	5.53978	5.7066
ASHGA5P029446	0.0306496	-1.97518	down	noncoding	uc021rpi.1	AF532840	UCSC_knowngene	245	chr14	+	22356438	22356683		AAGGTTTACAGCACAGCTCAATAAAGCCAGCCAGTATGTTTCTCTGCTCATCAGAGACTC	intergenic							22.4385	34.366	3.63797	4.61995	5	22.4287	87.8052	31.7639	10.0219	7.99217	5	9.49614	27.7636	21.7676	10.0053	44.5298	63.2685	40.6101	32.6172	2.62964	3.44068	4.98881	4.43946	3.41776	4.4469	2.61568	3.12481	4.80528
ASHGA5P053396	0.0308259	-6.2387	down	noncoding	ENST00000454813	GAS5	GENCODE	621	chr1	-	173833039	173834009	ENST00000412059, uc001gjk.3	GATTCTGAGGTTACTCTACTAACAAGCATCACACATTTGTATTTTGCCCTGATTAATATG	intergenic							296.028	531.698	5.85244	8.49369	5	418.131	1165.72	414.592	178.483	5	5	176.299	240.877	550.439	126.656	742.796	926.11	929.454	205.551	2.62964	7.51574	8.99728	8.18873	7.30855	2.57053	2.61568	6.99336	8.01008
ASHGA5P019256	0.0309167	-3.2297	down	noncoding	ENST00000483436	SNHG12	GENCODE	682	chr1	-	28905057	28908330	ENST00000475441	TACTGAGGAGATTCATGTTACATGTAAAGCTGTCCTCATTTGTGACTATGGACCTATGGA	intergenic							489.157	750.789	7.50434	9.19574	6.7385	927.982	1645.59	640.741	312.766	48.2776	12.0892	319.066	972.972	533.631	278.294	916.918	988.743	1014.73	550.23	4.43303	8.66321	9.51406	8.87384	8.15826	7.06232	5.47833	7.85166	9.79278
ASHGA5P036884	0.0309616	-2.02333	down	noncoding	NR_003245	HAR1B	RefSeq	896	chr20	-	61726844	61733671		GTGTGAGTTTCTACAGAGCAGAAGCCAAAAATATATGTTATCTAACTAGGTCCTATTTAC	intergenic							25.5192	35.6144	3.66185	4.67858	5	51.8606	53.6691	52.7185	17.2743	5	5	13.6308	15.8833	30.7468	16.2182	66.2111	40.6741	36.2858	43.2817	2.62964	4.50197	4.26132	5.15135	4.03607	2.57053	2.61568	3.52825	3.97294
ASHGA5P043406	0.0310253	-1.86935	down	noncoding	ENST00000467944	RP4-798C17.6	GENCODE	422	chr7	-	144004237	144040392	ENST00000463561, ENST00000464929, ENST00000475089, ENST00000486094, ENST00000489077, ENST00000493248, ENST00000496968, ENST00000498693	GATGGTTTCCCTAGAAGCTACTACCTCTCCCTGGAGGGTGGAGATATTTGCTGGTCAAAG	intronic antisense	NM_001001802	OR2A42	olfactory receptor 2A1/2A42	+	144015217	144016150	172.223	385.191	7.13393	8.03647	36.7305	291.733	429.16	114.381	187.503	109.795	36.7132	171.768	701.15	234.192	106.75	440.111	724.097	267.015	223.021	6.64187	6.99741	7.41005	6.2629	7.37584	8.25445	7.17724	6.9517	9.39081
ASHGA5P056489	0.0310535	-1.55423	down	noncoding	TCONS_00004782	XLOC_001457	LincRNAs identified by Cabili et al	1222	chr2	+	46874504	46877634		TTTGAAAATCCAATTGTAAGCCCATCTGTGTTTGCTCAGCCCTGTGTGTGCAACAGAGGT	intergenic							76.5985	102.703	5.68197	6.31817	8.94352	162.861	154.322	113.826	81.5324	18.6926	9.07231	63.5388	91.5861	76.3043	59.8369	161.738	101.724	142.128	85.6025	4.82942	6.13656	5.84586	6.25624	6.15928	5.68961	4.99986	5.53893	6.63401
ASHGA5P050572	0.0310716	-2.51006	down	noncoding	uc002suy.1	AL832439	UCSC_knowngene	3115	chr2	-	96472812	96492729	ENST00000411738, NR_040097, uc002sux.1	CTTTTTCAAACAAAGTTTCATGTTCTAATCATTGTCTGATTTCAGCATTAAATGAAACAC	intergenic							834.546	1801.05	8.97121	10.2989	27.8027	1446.74	2367.65	1162.17	455.605	452.695	89.8389	673.871	4573.08	1384.38	584.723	1608.89	1620.21	2074.61	761.426	6.29992	9.31397	10.1085	9.76888	8.68483	10.1411	8.44985	9.00263	11.6712
ASHGA5P041219	0.0310824	-2.40853	down	noncoding	ENST00000513011	TMEM161B-AS1	GENCODE	741	chr5	+	87564711	87566950		GATCACAGAGTGCAGTGTTCCTTATTTGTTGTATGGCAAGTTGATGAATAACTCTTGATT	bidirectional	NM_153354	TMEM161B	transmembrane protein 161B	-	87491022	87564665	34.0542	61.2616	4.18697	5.45512	5	53.7086	97.2954	54.3144	12.9648	12.3488	5	31.8015	131.858	42.6833	25.3479	49.4025	50.1923	88.6997	40.6473	2.62964	4.54886	5.13899	5.19339	3.7042	5.08865	2.61568	4.57633	7.15167
ASHGA5P036277	0.0311289	-1.79355	down	noncoding	ENST00000436616	AC009948.5	GENCODE	918	chr2	+	179278725	179298716		CCATATCTACAAGAACTATTTAGTTCTCAAAACTGGGAAGAAATGTTTCAGAGGCATCAT	intronic antisense	NM_001139517	PRKRA	interferon-inducible double stranded RNA-dependent protein kinase activator A isoform 2	-	179296140	179315484	25.469	33.2957	3.8118	4.65461	5	38.6873	76.8308	35.7913	14.776	5.09302	5	22.5737	24.9395	27.6857	14.6145	38.1979	50.5677	42.3963	34.6683	2.62964	4.09535	4.78251	4.61058	3.85398	3.78584	2.61568	4.12079	4.63781
ASHGA5P056005	0.0311891	-2.22682	down	noncoding	NR_026797	LINC00520	RefSeq	2030	chr14	-	56247852	56263392	NR_026796	GTTAAATACCTCAAATCTTTCGAGAACAGCAAGGAGCAAAATAAACTTAACTTCTCTGAG	intergenic							7.075	25.9349	2.86268	4.01767	5	6.00323	7.93954	13.0403	9.45865	5.1583	5	5	59.2666	14.737	5	11.5121	48.5861	23.6706	18.7716	2.62964	2.36086	2.43547	3.36278	3.35332	3.80352	2.61568	2.34018	5.97185
ASHGA5P020105	0.0312395	-2.18907	down	noncoding	ENST00000508286	LEF1-AS1	GENCODE	444	chr4	+	109094574	109097586		GGTGGATATGTGCTCCAGGAAAGTACCTGATTGACAAGATCTACATCCAATGCCCAGAAA	intergenic							255.004	430.044	7.24775	8.37807	22.1716	306.222	865.271	487.773	75.2914	128.98	31.7766	122.546	627.79	270.03	205.423	450.189	599.882	390.941	466.053	6.02844	7.06437	8.49713	8.41992	6.03866	8.49908	6.97198	6.46239	9.25391
ASHGA5P037552	0.0312775	-4.01798	down	noncoding	ENST00000441167	XXbac-B476C20.13	GENCODE	2493	chr22	-	18487035	18490074		GGCTGCTGCTGCTGTGGCCATCAGGGAGATAGGGAAATATGTCAATAAGAAATGTATATT	intron sense-overlapping	NM_001122731	MICAL3	protein-methionine sulfoxide oxidase MICAL3 isoform 3	-	18317100	18507325	7931.6	17833.6	11.7719	13.7784	277.559	13469.7	26112.6	12332.5	7316.37	1105.54	185.285	2653.23	29052.7	11539	2359.65	21757.8	27575.6	21678	10872.6	8.94864	12.8151	14.0938	13.6461	12.944	11.1743	9.41212	11.1412	13.5664
ASHGA5P058468	0.0312999	-1.6237	down	noncoding	uc003uui.2	PMS2P1	UCSC_knowngene	1429	chr7	-	99918262	99933930	NR_003614, uc003txn.4, uc010lbw.2, uc011kfp.2	TGCACCATAAAGAATTTCAAAGGAATATTAAGAAGGACTCCTAGAAGTACCCCACCCCAC	natural antisense	NM_001004351	SPDYE3	speedy protein E3	+	99905324	99919819	109.397	138.595	6.07771	6.777	12.3897	209.999	224.366	162.145	79.0877	13.3881	12.0499	161.748	120.904	142.965	84.7971	210.705	121.588	141.985	147.22	5.2696	6.49709	6.42254	6.77311	6.11592	5.20456	5.47533	6.86351	7.02242
ASHGA5P045247	0.0315028	-1.58505	down	noncoding	uc004adp.4	LOC554249	UCSC_knowngene	1355	chr9	-	46686628	46688098	ENST00000446626, NR_015363, uc004acc.4, uc010mmq.1	CAGTGGAGGTTTTAAATACAGAGTATTCATGAGTTTAGCAATGTTATTCGCCTCTCATTA	intergenic							12.5675	16.0246	2.94474	3.60926	5	21.4447	39.2976	13.0249	5	5	5	6.77311	9.16797	11.7141	5.77297	20.7617	21.9865	32.1764	10.5927	2.62964	3.38625	3.8764	3.36144	2.3654	2.57053	2.61568	2.75255	3.29064
ASHGA5P019476	0.031563	-2.53942	down	noncoding	ENST00000487022	GUSBP2	GENCODE	970	chr6	-	26846101	26924270	ENST00000514048, NR_029426, uc003jzw.3, uc011crf.1, uc011crg.2, uc011crh.2, uc011crl.1, uc011cro.2	ACTAACCAGTCCAAGGAGGAAGGAAAAACTGGACCTCATTATGAATTTACTTTTGGGATA	intergenic							37.1119	55.7031	3.8113	5.1558	5	28.262	177.178	27.2023	30.6558	5	5	18.5963	15.6964	57.596	16.5057	53.8527	119.05	85.4157	41.8055	2.62964	3.70755	6.06065	4.22951	4.79544	2.57053	2.61568	3.88143	3.95867
ASHGA5P044389	0.031605	-4.12118	down	noncoding	uc003yet.3	BC067244	UCSC_knowngene	2167	chr8	-	92080142	92082417		GACAGTACAGATGACCTATAAACTGGTTAAATAGCCCTATTACAATTGAAATTGGGTCAA	bidirectional	NM_016023	OTUD6B	OTU domain-containing protein 6B	+	92082423	92099323	153.284	285.165	5.60355	7.64661	5	216.376	320.535	368.895	82.0532	8.71252	5	219.701	118.804	223.194	91.8557	308.189	371.974	608.74	273.399	2.62964	6.54441	6.96694	8.01936	6.16822	4.57416	2.61568	7.31	6.99687
ASHGA5P025897	0.0316491	-3.6719	down	noncoding	NR_046073	DNAJC19	RefSeq	1262	chr3	-	180701497	180707562		CGGAGCCATGCCCTACTGCCAATAAAGGGAAAATAAGAGATGCTCATCGACGAATTATGC	exon sense-overlapping	NM_001190233	DNAJC19	mitochondrial import inner membrane translocase subunit TIM14 isoform 2	-	180701497	180707306	767.826	1342.61	8.17774	10.0543	14.3314	1295.4	1923.51	1330.68	589.176	66.0178	9.19377	914.3	1035.06	947.991	442.287	1789.24	1941.03	1901.6	1341.09	5.4701	9.16959	9.73086	9.98428	9.06804	7.51238	5.02263	9.46408	9.86581
ASHGA5P043106	0.0317304	-1.88858	down	noncoding	uc003tvp.3	BC006435	UCSC_knowngene	383	chr7	-	66742731	66743114		AAATCATAGGAAACTGCCCCTGAGCTCACACATATTTCCAATGGTGTCCCCAATTTCAGG	intergenic							346.91	469.262	7.64562	8.56293	25.7345	652.822	679.539	622.561	274.111	51.3607	22.8001	446.348	388.574	403.811	251.43	593.933	620.111	622.531	404.446	6.20309	8.15767	8.09707	8.81056	7.94156	7.15167	6.45632	8.34705	8.64566
ASHGA5P049220	0.0317921	-1.78675	down	noncoding	ENST00000571523	RP11-44F14.11	GENCODE	2929	chr16	-	53524951	53527880		GGAACACCCAAAAATATTTTTAAATATATCACCTTAATAGACATTTCTTTTAGATAACTC	exon sense-overlapping	NM_001012398	AKTIP	AKT-interacting protein	-	53525191	53537170	21.6596	27.0728	3.55948	4.39682	5	49.3129	30.2324	44.7116	12.0746	5	5	21.9454	27.3161	33.9036	16.1166	34.2634	30.5705	28.647	18.6925	2.62964	4.4317	3.59394	4.92373	3.62751	2.57053	2.61568	4.0831	4.77887
ASHGA5P055525	0.0318612	-3.56619	down	noncoding	ENST00000549651	RP11-611E13.2	GENCODE	883	chr12	-	70636085	70637140		TTTGCAATAATTCGCCTTTATTTCCTTGTATATCTGTAAACTCTTCACTTTTTTGTAATT	natural antisense	NM_001199302	CNOT2	CCR4-NOT transcription complex subunit 2	+	70636809	70748773	115.648	225.674	5.46311	7.29749	5	236.619	289.383	182.304	54.643	21.1575	5	131.081	397.941	157.788	71.7617	182.088	263.461	391.808	114.868	2.62964	6.67767	6.81051	6.94475	5.59616	5.86688	2.61568	6.56359	8.68385
ASHGA5P022179	0.0319569	-2.57677	down	noncoding	ENST00000551421	RP11-620J15.3	GENCODE	451	chr12	-	58325310	58329862	ENST00000547492, NR_038269	TTTAGAAAATGTGCTAAAGAACATACAGACACAGAGCAGACAGGCCACCTTTGCAACCAC	intergenic							330.108	507.111	7.30673	8.6723	9.38688	764.338	640.518	511.957	310.475	49.9421	12.0051	342.24	557.32	313.709	314.393	511.175	642.15	680.697	530.332	4.89368	8.39543	7.99856	8.48614	8.14332	7.1126	5.46863	7.95548	9.10582
ASHGA5P048234	0.0319741	-2.12727	down	noncoding	ENST00000533502	CTD-3074O7.5	GENCODE	581	chr11	-	66241829	66247663		CTGTACCACAAGGAGCTGCCACTAACACCTGTGTCAGAACTACTGTAAGGACCCTTTCCT	intronic antisense	NM_001098510	PELI3	E3 ubiquitin-protein ligase pellino homolog 3 isoform 2	+	66234335	66244808	37.0149	53.6666	4.31206	5.40106	5	51.7897	97.5391	68.6466	26.4789	11.3892	5	30.2758	64.6392	45.8657	32.3211	51.1058	74.3384	60.9142	46.4817	2.62964	4.49987	5.14219	5.53318	4.59337	4.97323	2.61568	4.50928	6.10489
ASHGA5P048739	0.0323698	-2.22204	down	noncoding	uc001bqm.3	SNHG12	UCSC_knowngene	1781	chr1	-	28905049	28908366	uc001bqn.3	CTAAGCTTTTTGTTCTGCAGGTTGCCCCCAAGTTTCCTGGCAGTGTGTGATACTGAGGAG	natural antisense	NM_017846	TRNAU1AP	tRNA selenocysteine 1-associated protein 1	+	28879528	28905057	335.001	461.748	7.37034	8.52222	45.0256	620.138	964.72	438.809	303.539	26.208	9.89672	271.675	361.54	394.808	231.933	618.978	646.217	616.443	362.319	6.86908	8.08849	8.67797	8.2717	8.10692	6.17474	5.14787	7.6259	8.54918
ASHGA5P042233	0.0324025	-1.72207	down	noncoding	ENST00000454882	RP3-380B8.4	GENCODE	412	chr6	+	5851738	5870453		GCCCACACATAAGCTGAAGTATTGCCTTATGACATATTCTGAATATTCCAATTATTTTGC	intergenic							6.52621	16.593	2.77833	3.56247	5	6.00889	7.50538	10.7695	5	5.15749	5	7.76845	25.7802	8.042	5	29.1663	16.152	20.9579	11.0523	2.62964	2.36102	2.4153	3.14271	2.3654	3.80281	2.61568	2.89407	4.68836
ASHGA5P049313	0.0325261	-2.05065	down	noncoding	ENST00000566411	AC009120.6	GENCODE	679	chr16	-	74339099	74344205		GGGCAGGAAAAGGCATCAGGGTACCATGTTATCAGGCAAGTTCTTACATTCTAAGAAAAT	natural antisense	NM_002811	PSMD7	26S proteasome non-ATPase regulatory subunit 7	+	74330672	74340186	497.259	942.408	8.39352	9.4296	41.0387	833.372	1208.41	843.143	297.063	237.494	54.1874	463.366	1914.65	631.898	367.904	753.449	839.389	1407.83	681.744	6.77541	8.51091	9.04061	9.29392	8.06613	9.31695	7.7442	8.40005	10.5988
ASHGA5P022043	0.0325939	-2.5773	down	noncoding	ENST00000547777	RP11-493L12.4	GENCODE	329	chr12	+	47641906	47643068		CTTCAAACAGAACCAGAAATTATGGTGCTACAAAAATACCTGCTTATCTTAGAGCCAAAA	intergenic							45.3149	65.8935	4.24167	5.60753	5	70.9203	94.0686	102.624	30.8089	5	5	49.0974	40.5071	55.6938	25.8275	90.0054	86.7322	73.0372	89.451	2.62964	4.93671	5.08557	6.11377	4.80223	2.57053	2.61568	5.17919	5.38477
ASHGA5P031289	0.0326911	-3.00899	down	noncoding	ENST00000565313	AC009120.6	GENCODE	539	chr16	-	74339153	74366511		CCCGAAGTCAAAAACGACTAGAACACAGCTTAAAAATCAAGCCATTTAATTGTATCTTTG	natural antisense	NM_002811	PSMD7	26S proteasome non-ATPase regulatory subunit 7	+	74330672	74340186	63.7292	100.408	4.48148	6.07075	5	105.434	206.123	98.4917	36.4626	5	5	48.3225	52.668	110.168	25.2504	144.397	140.166	183.105	47.1001	2.62964	5.49139	6.29505	6.05441	5.04021	2.57053	2.61568	5.1549	5.79691
ASHGA5P048458	0.0326997	-3.22425	down	noncoding	AK098597		LincRNAs identified by Khalil et al	1683	chr4	+	42097863	42101378		AATACCATCTTATTCTAGCAAGAGTATCAGAGTGCGTTCATTCCTGAGGACCCTTTCCCT	intergenic							74.1341	114.452	4.74204	6.431	5	119.685	153.652	123.153	65.549	5	5	116.034	96.0135	89.6954	47.1449	155.995	135.368	188.097	88.849	2.62964	5.67896	5.83906	6.37564	5.84093	2.57053	2.61568	6.38588	6.70056
ASHGA5P039321	0.0328792	-2.84057	down	noncoding	ENST00000513179	RP11-539L10.3	GENCODE	406	chr4	-	6672454	6675550	ENST00000515205	GCTAGTTTAAGGAAATATCTGACGCTGATAACCATGTCCCAAGCACTGCTCTAAGTTCCC	intergenic							44.4585	80.5327	4.20001	5.7062	5	75.6212	75.2761	118.837	42.4371	5	5	28.4962	23.1771	51.308	24.1194	124.306	120.891	145.776	74.1521	2.62964	5.031	4.75004	6.31787	5.25696	2.57053	2.61568	4.4284	4.52796
ASHGA5P033243	0.0328919	-2.26674	down	noncoding	ENST00000576602	RP11-670E13.2	GENCODE	618	chr17	+	54946307	54946925		GCATTAGAGGAAGAATATTCTGTAGTCCTGCTTTATTCTGCCATCTTTACCTGGAAATCC	intergenic							63.2724	114.71	5.21596	6.39658	5	121.404	162.778	93.8027	43.1819	18.2504	10.9973	50.7658	224.551	90.7036	54.36	98.4159	134.711	136.087	64.1402	2.62964	5.69883	5.92919	5.97862	5.27764	5.65383	5.33108	5.22888	7.90602
ASHGA5P012745	0.0328944	-1.52344	down	noncoding	ENST00000380330	RP11-116G8.4	GENCODE	4126	chr10	-	5556206	5565140		AAACCCTGGAGTCAAATTCCATTTCCTCATGAGGGCTTCCCTGAATACCCACTTTTAATT	intergenic							12.2453	16.0069	3.08273	3.69006	5	16.2191	23.2343	13.1343	6.13014	5	5	24.2447	13.0821	15.6306	9.50313	13.6942	25.3035	16.3922	18.4427	2.62964	3.0566	3.31839	3.37222	2.88872	2.57053	2.61568	4.21002	3.71977
ASHGA5P037027	0.0329429	-1.75282	down	noncoding	TCONS_00025471	XLOC_012288	LincRNAs identified by Cabili et al	2793	chr17	+	66179204	66185240		ATGTGTCACTGTGTAAGTTACCACTGCAATATCTTCTGTATGTTGAAAAACTGGTACTTA	intergenic							14.9725	23.6248	3.24463	4.05431	5	18.6741	30.6574	31.8775	15.3143	5	5	8.25627	13.9712	25.3075	6.60027	27.0937	39.7322	40.9642	11.7048	2.62964	3.22967	3.60843	4.44659	3.89168	2.57053	2.61568	2.96485	3.80248
ASHGA5P051064	0.0330906	-2.55407	down	noncoding	ENST00000447343	RP4-583P15.10	GENCODE	464	chr20	+	62376039	62377302		CTTTTCACTCAGGAAAAGAAAGAACATGTGAGTGCTTCTGAAAACACAGCAAGAGGACTT	natural antisense	NM_025224	ZBTB46	zinc finger and BTB domain-containing protein 46	-	62375020	62436856	103.892	192.291	5.68568	7.03848	5.40078	161.245	372.866	148.768	44.8176	46.3456	5.04642	46.6473	424.941	105.235	82.8546	209.539	292.581	148.404	82.4822	4.12398	6.12381	7.18398	6.659	5.32253	6.99924	3.96932	5.10355	8.76023
ASHGA5P031841	0.0331971	-2.44611	down	noncoding	NR_046242	LOC100505865	RefSeq	913	chr16	+	66442426	66444803		GCTGGAGGAGTAAGAACTATAAGGCTAATTGAAATGAATCTACTTAAAATAGTGACCTGA	intergenic							35.7953	71.4561	4.35356	5.64405	5	36.0918	109.019	49.2922	27.1594	23.8571	5	30.943	119.233	57.7881	19.0841	76.259	115.9	70.3299	41.5979	2.62964	4.00328	5.31317	5.05713	4.62836	6.04076	2.61568	4.5405	7.00177
ASHGA5P019734	0.0332219	-1.53718	down	noncoding	ENST00000502245	RP11-431M7.3	GENCODE	1043	chr4	+	36258139	36275562		TGTTGTACAGAACTACTTCTCAAATCACTATTCACATCCTGGTAGAAGTCAAGCAATGAA	intergenic							8.42967	13.0661	2.76509	3.38537	5	16.3528	14.2471	9.46532	7.37218	5	5	5	13.1173	5.82313	5.82298	7.71175	25.2988	16.5365	17.1519	2.62964	3.06516	2.80854	3.00609	3.08489	2.57053	2.61568	2.34018	3.72261
ASHGA5P020135	0.0334017	-3.02355	down	noncoding	ENST00000508590	EPB41L4A-AS1	GENCODE	292	chr5	+	111496630	111498008		CCTGAGTCTGGTGGAAGATGGATGCCTGAAGTGTAGACTGCTGCTAGCTGAATACCATCT	intergenic							1241.75	2297.44	9.30708	10.9033	22.2242	1816.16	3212.24	2505.23	1078.27	429.076	55.5793	815.252	2376.98	1127.87	1126.99	2588.32	3424.45	2954.3	2483.15	6.031	9.64398	10.6279	10.9755	10.0206	10.0889	7.77677	9.29201	10.8841
ASHGA5P018786	0.0334156	-3.07606	down	noncoding	ENST00000457645	BX248398.1	GENCODE	554	chr1	-	144300516	144301385	ENST00000434159	TTTAGTCCTTTGAAGAGAGCAGAATGGGGAAATGGAGAGAGAACCTGAAAGAGCCCCAAA	intergenic							721.566	1201.97	8.22799	9.84907	36.7862	1228.24	2085.89	728.292	529.653	54.5012	10.6468	1098.52	515.999	1027.39	432.047	1431.97	2101.11	1958.72	946.549	6.64443	9.0736	9.88116	9.0696	8.90459	7.23416	5.27448	9.74189	8.99784
ASHGA5P018940	0.0338375	-4.46383	down	noncoding	ENST00000475441	SNHG12	GENCODE	444	chr1	-	28905049	28907741	ENST00000461832, ENST00000488745, NR_024127, uc001bqn.3	ACTTAAGCAGATGAAGACTCTTAAGATGACAGAAGGTGATTTTTCTGGTGATCGAGGACT	natural antisense	NM_017846	TRNAU1AP	tRNA selenocysteine 1-associated protein 1	+	28879528	28905057	170.55	244.999	5.31429	7.47257	5	282.604	659.034	217.125	98.209	5	5	92.4264	148.166	170.118	90.4913	291.396	433.752	399.815	181.254	2.62964	6.94996	8.04222	7.21088	6.42851	2.57053	2.61568	6.0669	7.31303
ASHGA5P056948	0.0339881	-2.11945	down	noncoding	TCONS_00010939	XLOC_004848	LincRNAs identified by Cabili et al	505	chr5	-	65220459	65221176		TGTTAGAAGAAACATGGAAAAGACGGCCTTGTTTTACCCAGAGAAGGAGCGTAATGCGGA	intergenic							38.4717	54.7896	4.26606	5.34975	5	75.7954	89.5395	51.9539	30.4945	5.44351	5	44.5466	35.9984	39.5839	29.3085	64.6303	74.9295	99.055	40.0212	2.62964	5.03485	5.01956	5.12965	4.78855	3.87835	2.61568	5.03216	5.1978
ASHGA5P031964	0.0341524	-2.62797	down	noncoding	TCONS_00029808	XLOC_014244	LincRNAs identified by Cabili et al	1344	chr22	+	39462293	39465987	TCONS_00029809	GAATCTCAATGAACAAAATGCACTGGGACCTACTATGTACCCAGAAAAATGAAAAGTAAA	intron sense-overlapping	ENST00000452957	APOBEC3G	apolipoprotein B mRNA editing enzyme, catalytic polypeptide-like 3G [Source:HGNC Symbol;Acc:17357]	+	39436923	39483735	256.419	639.498	7.53401	8.92796	15.899	219.554	346.042	557.851	183.583	413.652	41.5177	273.25	928.512	308.836	317.912	523.291	738.011	864.459	795.467	5.60822	6.57054	7.07735	8.63565	7.34155	10.0488	7.35727	7.63268	9.7396
ASHGA5P033947	0.0342792	-1.88057	down	noncoding	ENST00000565797	CTB-31O20.2	GENCODE	1288	chr19	-	1874880	1876168		CATCTATGTTACGTTGATCATTGTTACCACTGACAGTCGTTTCGAGATTGGAAAATATGT	intergenic							573.381	1053.74	8.694	9.60517	70.2832	1078.68	1593.47	663.778	304.345	309.14	108.839	458.507	2042.97	793.159	357.552	809.118	1243.02	1421.99	708.379	7.39303	8.88119	9.46706	8.93301	8.11139	9.68085	8.70028	8.38519	10.6744
ASHGA5P014634	0.0343062	-7.5585	down	noncoding	ENST00000450589	GAS5	GENCODE	632	chr1	-	173833038	173837125	ENST00000412059, ENST00000416952, ENST00000436285, ENST00000436656, ENST00000442067, ENST00000449589, ENST00000454068, ENST00000455838, uc001gjk.3	CCTTTTAAAGGTATGGAGAGTCGGCTTGACTACACTGTGTGGAGCAAGTTTTAAAGAAGC	bidirectional	NM_001122770	ZBTB37	zinc finger and BTB domain-containing protein 37 isoform a	+	173837492	173855774	2725.46	5781.29	9.20811	12.1262	11.7486	3347.15	9897.98	4288.54	2204.45	34.0227	10.3182	2009.46	2587.55	2679.58	1257.19	6710.78	13179.1	9019.01	5035.79	5.20325	10.5912	12.4493	11.8584	11.1013	6.54763	5.22254	10.6912	10.9875
ASHGA5P014855	0.0345044	-4.78747	down	noncoding	ENST00000456812	GAS5	GENCODE	723	chr1	-	173833038	173836181	ENST00000414075	GAAGAAATGCAGGGTTTTTAATGACCACAACAAGCAAGCATGCAGCTTACTGCTTGAAAG	intergenic							2740.14	5258.19	9.78884	12.0481	38.3988	3601.55	9905.84	3693	2389.26	119.541	23.1807	2150.32	2213.1	2828.48	1426.2	6398.4	11153.9	7501.09	5286.2	6.69834	10.6772	12.4514	11.6038	11.2177	8.38287	6.48141	10.7981	10.7875
ASHGA5P051428	0.0349563	-1.95024	down	noncoding	ENST00000457043	RP11-418J17.1	GENCODE	540	chr1	+	119683330	119684823		CCTATAAAGGAGCTGAAATCTACCAGGGTAAGACAAAACAGTAAATTAAAACCATATAGG	bidirectional	NM_015836	WARS2	tryptophan--tRNA ligase, mitochondrial isoform 1 precursor	-	119573838	119683295	16.209	36.6229	3.73201	4.69566	5	12.416	41.4747	20.1077	13.9178	11.0138	5.05838	20.6838	55.7627	34.233	8.43503	40.126	46.3315	25.1811	46.2909	2.62964	2.75795	3.93481	3.84864	3.78362	4.91719	3.97387	4.01031	5.88005
ASHGA5P053882	0.0349602	-1.98685	down	noncoding	uc004cin.3	SNHG7	UCSC_knowngene	743	chr9	-	139619045	139620988	NR_003672	AGGATCACGCAGGACAGGACTGGGGAAGGGTTTGCTGGCGTCTCGGTTAATAGCAGTAAC	natural antisense	NM_152421	FAM69B	protein FAM69B	+	139607023	139619170	12.5601	25.2097	3.10314	4.09363	5	15.5723	33.576	12.1162	12.7609	5	5	11.4556	68.7446	17.8377	11.1145	18.3401	15.5578	37.948	6.92537	2.62964	3.00628	3.70206	3.27921	3.68668	2.57053	2.61568	3.33506	6.18983
ASHGA5P033017	0.0350076	-2.36017	down	noncoding	ENST00000580085	CTD-2349P21.9	GENCODE	462	chr17	+	29119389	29119851		CCATTAACAGGGTATCATGATCAGTCCCACAAATTACAAAAGATTTTAGTATATTCCTGC	natural antisense	NM_015986	CRLF3	cytokine receptor-like factor 3	-	29109701	29151778	69.076	120.201	5.28669	6.52558	5	130.797	143.181	120.882	44.8265	28.2846	6.52222	73.115	194.7	100.201	53.1927	131.656	108.968	142.172	110.516	2.62964	5.81296	5.72593	6.34768	5.32295	6.28495	4.42621	5.7432	7.71603
ASHGA5P018454	0.0351185	-3.76635	down	noncoding	ENST00000453754	SNHG5	GENCODE	401	chr6	-	86386801	86388291		TTAATTGGGGCGGAGGGAACAATGGCGCTGTCTTCAGTGGCACAGTGGAGCAGCTCTGAA	intergenic							1293.31	2352.67	8.95281	10.866	16.8413	1238.9	3668.2	2885.08	1057.91	116.254	22.8038	1340.46	1534.33	1565.67	626.398	3725.79	3562.62	2735.9	2717.95	5.68135	9.09561	10.8284	11.1914	9.9909	8.3409	6.45693	10.0371	10.3394
ASHGA5P022711	0.0351803	-2.74613	down	noncoding	ENST00000561289	CTD-3110H11.2	GENCODE	554	chr15	+	50647741	50648611		GAAGGAACGAGGGCGTCTGGGCATGGCTTTCCCAACCTAGTAACTGCAACTTTTAGCATC	bidirectional	NM_002041	GABPB1	GA-binding protein subunit beta-1 isoform gamma 1	-	50578076	50647605	118.986	190.409	5.70111	7.1585	5	237.016	234.208	201.235	94.3811	11.1714	6.9658	161.911	122.98	201.596	81.2687	228.695	200.073	356.158	142.094	2.62964	6.68058	6.48979	7.09633	6.37296	4.93813	4.53658	6.86484	7.0415
ASHGA5P055144	0.0353197	-2.72186	down	noncoding	ENST00000527511	RP11-356J5.12	GENCODE	597	chr11	+	112163295	112164839		CAGCCAAGATACAAACATTGGACGTATTTGTACAGCAGCTAAAGGTACTATAATAATACA	intergenic							42.21	66.5441	4.10154	5.54614	5	79.5086	118.57	71.4964	33.5645	5	5	19.5405	127.572	34.4123	20.189	64.4055	75.5707	53.3769	90.2825	2.62964	5.09659	5.44283	5.59356	4.92489	2.57053	2.61568	3.93862	7.09409
ASHGA5P019674	0.0353292	-3.15809	down	noncoding	uc001zyi.3	BX537481	UCSC_knowngene	2286	chr15	+	50647663	50650503		CTGTTCTGCGGGGCGTCTGGGCATGGCTTTCCCAACCTAGTAACTGCAACTTTTAGCATC	bidirectional	NM_002041	GABPB1	GA-binding protein subunit beta-1 isoform gamma 1	-	50578076	50647605	105.491	168.216	5.30389	6.96295	5	204.528	226.147	183.8	76.4336	9.28677	5	133.734	89.6329	171.483	73.8865	212.853	202.331	306.138	121.191	2.62964	6.45853	6.43837	6.95835	6.06209	4.67649	2.61568	6.592	6.60157
ASHGA5P055699	0.0359594	-1.68962	down	noncoding	ENST00000544727	RP11-983C2.2	GENCODE	482	chr12	-	127355011	127359211	NR_033970	AAGACAGCACCGGGTTTCACACTGGCAAGGCAGGAGGCTGTGTGCTGCCAGAACGACCAG	intergenic							12.979	20.1373	3.1231	3.8798	5	17.8858	16.5904	17.4005	5.42717	5	5	31.5278	13.9212	35.368	6.99239	17.116	26.5288	31.0641	9.97076	2.62964	3.17679	2.96112	3.68697	2.77934	2.57053	2.61568	4.56473	3.79707
ASHGA5P018118	0.0361976	-2.79746	down	noncoding	ENST00000449648	RP11-5N23.2	GENCODE	421	chr10	+	6625640	6626260		GACCTAGTTGAAGTCACAGCTTGGAGGAAACCAGTTTGCACTATTTGATGAGGAATTTGG	intergenic							2500.83	3945.6	10.2885	11.7726	59.7754	3346.22	8059.55	4812.67	1411.68	560.358	163.002	1593.36	3753.61	3208.38	1422.23	4859.78	4992.21	5195.45	4187.57	7.18913	10.5899	12.1082	12.0519	10.4238	10.3814	9.24313	10.3202	11.4341
ASHGA5P030005	0.0362139	-1.81559	down	noncoding	uc001zwf.1	AK021664	UCSC_knowngene	2145	chr15	-	48426827	48428972		GGGCCAACATGATAGTGTTGAGACCTGTAATATGGTAAGTTATTATTTCCATTACATTGT	natural antisense	NM_205850	SLC24A5	sodium/potassium/calcium exchanger 5 precursor	+	48413168	48434589	11.922	18.9081	2.85339	3.71383	5	8.54319	40.2554	21.5772	5	5	5	5	13.127	16.8461	5	22.4633	25.7653	39.0403	10.1144	2.62964	2.47464	3.90358	3.92743	2.3654	2.57053	2.61568	2.34018	3.72347
ASHGA5P035252	0.0362342	-2.18655	down	noncoding	ENST00000452795	RP4-798A10.4	GENCODE	342	chr1	+	16847188	16848303		TATTCTCAGGGCCCACCGGGCAGGACCACTGAGCAAGGCCTTGGAAAACCAGAGAGATTA	intergenic							25.3954	33.0144	3.41508	4.54374	5	28.8198	113.168	25.4231	15.7523	5	5	5	13.4855	16.0298	19.2844	41.6666	48.5407	67.0118	25.082	2.62964	3.72839	5.36965	4.14035	3.9262	2.57053	2.61568	2.34018	3.75565
ASHGA5P042490	0.036245	-2.32657	down	noncoding	ENST00000418403	RP11-462G2.1	GENCODE	397	chr6	+	71104589	71109120		GCCGAACAGATGAAAAAATGCATTGTCAACGGAATCTTTTATGTTTGTTTGTCTTCCTTT	intergenic							10.4302	33.7361	3.20661	4.42482	5	16.6524	16.2058	5.1331	7.43979	13.0103	5	14.9998	63.3198	17.5565	5	48.8346	43.3817	29.5993	28.4604	2.62964	3.08892	2.93565	2.49754	3.09404	5.16095	2.61568	3.63048	6.07613
ASHGA5P028559	0.0364563	-2.41605	down	noncoding	ENST00000438752	DLEU2	GENCODE	2090	chr13	-	50617571	50656114		CAGAGATACAGCTTCTTATAGTAACACTAAAACTTTCTTCCTCTTTGGACTGAATACCTA	bidirectional	ENST00000378180	DLEU1	deleted in lymphocytic leukemia 1 (non-protein coding) [Source:HGNC Symbol;Acc:13747]	+	50656306	50679433	33.4953	59.4222	3.94888	5.22153	5	63.7193	78.8731	52.9475	19.2802	5	5	38.1423	34.2902	44.1759	11.3794	84.8876	75.8424	138.203	27.1773	2.62964	4.79002	4.82744	5.15668	4.18208	2.57053	2.61568	4.81895	5.12221
ASHGA5P037651	0.0365239	-1.6612	down	noncoding	ENST00000429350	CTA-85E5.10	GENCODE	902	chr22	-	30404730	30476219		AGAGGAACACACTGAATTTTAGCTATCTTTTCAAAAAGCGTGAAAAGGGAAGGTTAGATT	natural antisense	NM_021090	MTMR3	myotubularin-related protein 3 isoform c	+	30279157	30426857	6.16803	13.4116	2.49139	3.22362	5	9.17733	10.1669	5	5	5	5	5	28.0932	6.97811	5	18.7243	10.1844	19.9015	5	2.62964	2.51531	2.55733	2.33704	2.3654	2.57053	2.61568	2.34018	4.82523
ASHGA5P017822	0.0365437	-1.81496	down	noncoding	ENST00000448195	MAGI2-AS3	GENCODE	774	chr7	+	79083327	79100364	NR_038346	TGATGACATGCCTACAGCACAGCTGATGAAAGAGAAGACATCTTGCTGCTATTTGACAAG	bidirectional	NM_012301	MAGI2	membrane-associated guanylate kinase, WW and PDZ domain-containing protein 2	-	77646373	79082890	7.57487	19.9948	2.62364	3.48358	5	10.348	16.7655	8.48554	5	5	5	5	5	60.5268	5	24.291	13.987	24.5696	6.58961	2.62964	2.6049	2.97353	2.88927	2.3654	2.57053	2.61568	2.34018	2.35685
ASHGA5P016005	0.0365878	-1.76758	down	noncoding	ENST00000425727	AC017116.11	GENCODE	607	chr7	+	44104603	44105678	ENST00000445938	TCACGAGGCGGCTAGGAGGCGGCCCTCAGCAGGCAGAGGAGGAGAGCCAGAGGAGCTGGT	natural antisense	NM_000290	PGAM2	phosphoglycerate mutase 2	-	44102325	44105186	9.67926	18.3177	2.90866	3.73044	5	24.3301	11.1319	7.52106	9.17184	5	5	10.2792	32.9216	17.454	5.58814	11.3493	16.9659	37.9408	6.00396	2.62964	3.53271	2.6153	2.7751	3.31976	2.57053	2.61568	3.21058	5.06057
ASHGA5P023202	0.0368378	-2.24668	down	noncoding	ENST00000573355	RP11-874J12.2	GENCODE	180	chr18	+	3594452	3597226	ENST00000574411	GTGGCTCACGATGGATATCTGAGAGCCAGCGAACTTTCTTTACCTCCTAGTATCATTTCA	intronic antisense	NM_001003809	DLGAP1	disks large-associated protein 1 isoform 2	-	3496029	3845358	179.858	286.222	6.58324	7.75104	10.2081	415.01	319.03	210.652	184.71	39.0675	6.4213	253.762	184.54	190.347	113.965	391.725	453.672	379.395	289.907	5.01109	7.50375	6.9612	7.16777	7.34955	6.75658	4.39534	7.52065	7.64381
ASHGA5P048636	0.0368777	-2.22286	down	noncoding	NR_040062	LOC100131089	RefSeq	572	chr15	+	40331511	40349201	NR_040061	TATTTTAATATGTAACAGTCATATGGTTTAAATATAAAAATGACATCAGTGGCTCAGTAA	bidirectional	NM_003134	SRP14	signal recognition particle 14 kDa protein	-	40327890	40331389	39.6789	55.7727	4.23156	5.38398	5	78.4661	109.958	67.2573	15.7138	7.45449	5	28.5813	90.0084	45.4003	19.596	55.5259	71.5016	57.6423	50.7343	2.62964	5.08042	5.32589	5.50679	3.92363	4.33703	2.61568	4.43339	6.60788
ASHGA5P031851	0.0369325	-2.6674	down	noncoding	ENST00000429469	RP11-553K8.2	GENCODE	363	chr1	-	198566853	198567998		CTCTAACACTTGAAAACTTTCACAGTACTTTTTCACTAAGGCTACTGTCAAGTCTGAAAA	intergenic							17.0548	50.4852	3.69394	5.10937	5	23.0301	19.6563	27.392	9.14139	30.8713	5	16.3471	120.194	18.0473	21.3663	45.3547	35.2759	76.3415	36.8169	2.62964	3.47041	3.14072	4.23811	3.31608	6.4121	2.61568	3.72876	7.01251
ASHGA5P006918	0.0370888	-2.1469	down	noncoding	NR_026591	RAD1	RefSeq	4525	chr5	-	34905365	34915731		TTTTATTCAGGGACTTTAACTGCACTTCGAATGTGTTACCAAGGTTATGGTTACCCTTTG	exon sense-overlapping	NM_002853	RAD1	cell cycle checkpoint protein RAD1	-	34905365	34915780	37.0239	56.5866	4.27179	5.37405	5	53.3017	95.965	72.5227	27.989	8.93586	5	27.477	53.7686	34.8669	21.4959	63.7742	86.3405	92.2008	43.6589	2.62964	4.53775	5.11916	5.61185	4.66995	4.6144	2.61568	4.37591	5.82658
ASHGA5P032428	0.0372536	-2.08774	down	noncoding	ENST00000560400	RP11-156E6.1	GENCODE	2930	chr17	-	40004769	40007699		GTTTTATGTTCCTGAAGCTATCTTGTTCTCTGTTAAAGCTACTAATTGTCTCAGTGTAAG	intergenic							909.968	1725.02	9.26019	10.3221	56.1435	1667.02	2135.23	1469.37	544.539	445.611	134.807	827.019	3721.1	919.361	644.113	1614.46	1805.95	2019.65	1350.51	7.12685	9.50783	9.93311	10.1308	8.948	10.1202	8.99784	9.31695	11.4148
ASHGA5P013202	0.037303	-1.77897	down	noncoding	NR_047512	APBB1	RefSeq	2267	chr11	-	6416354	6440332		TGCGTGCATGGTGGAACAGGAGGAACTGGTCCAGGCCAGGCCTCATCCTCCTGGACCCAG	exon sense-overlapping	NM_001164	APBB1	amyloid beta A4 precursor protein-binding family B member 1 isoform a	-	6416354	6440332	130.12	231.907	6.64881	7.47985	33.6856	197.41	384.355	193.779	72.6628	58.263	31.854	68.9487	363.777	125.95	137.673	196.976	311.649	234.895	252.429	6.54076	6.41256	7.23776	7.04049	5.98871	7.33587	6.97351	5.66079	8.55549
ASHGA5P055853	0.0374005	-1.59778	down	noncoding	TCONS_00003908	XLOC_001715	LincRNAs identified by Cabili et al	919	chr2	+	156329467	156346085		AAGCCACAGGGTGTAGATAATCCACAAACAAGCTAATTGGTCCCTGGGTAATTGCTGACT	intergenic							15.6496	20.5928	3.35728	4.03335	5	22.8627	19.7256	23.055	17.9366	5	5	26.6169	15.1064	24.0845	13.1234	25.8437	19.2252	28.3188	18.4474	2.62964	3.46254	3.14448	4.0093	4.08971	2.57053	2.61568	4.33634	3.90324
ASHGA5P032938	0.0374155	-1.54512	down	noncoding	uc002gwy.3	BC044655	UCSC_knowngene	2836	chr17	+	20340136	20350557	NM_000625	CTTGGGTCTTCTCTGTATGATTCCCTGATGGAGATATTTACATGAGTTGAATTTTACTTT	intergenic							10.785	16.1584	2.93533	3.56305	5	19.7434	18.9457	10.7991	5	5	5	16.7918	19.3632	23.0794	5.58075	13.2973	29.6202	16.4459	5.7218	2.62964	3.29581	3.10387	3.14591	2.3654	2.57053	2.61568	3.75581	4.2604
ASHGA5P043149	0.0378742	-1.69042	down	noncoding	uc011kfv.1	PMS2L2	UCSC_knowngene	455	chr7	-	74973235	74982902	ENST00000529061, NR_003613, NR_003614, NR_023383, NR_027775, NR_027776, NR_028058, uc003txh.4, uc003txn.4, uc003uca.4, uc003uui.2, uc010lbw.2, uc010lgv.1, uc011kep.2, uc011kfp.2, uc011kfq.2, uc011kfr.1, uc011kft.1	ACCCCTGCTCCTTGGAGGACAACGTGATCACTGTATTCAGCTCTGTCAAGAATGGTCCAG	intergenic							896.059	1367.17	9.33158	10.089	123.829	2022.52	2051.91	1147.55	533.187	438.886	148.647	701.944	2286.84	821.938	711.637	1477.5	1456.04	1481.62	1334.62	8.05114	9.80544	9.84634	9.74256	8.91429	10.1062	9.12255	9.06408	10.8341
ASHGA5P015723	0.0380109	-2.14525	down	noncoding	ENST00000422972	CTA-292E10.6	GENCODE	409	chr22	+	29214318	29218203		TCACTTTGTACAATGAGTGTGCCTTCAGCCAAAAGCAGAACTGGAAACATCCTAAGTGGG	intergenic							32.5624	56.3017	4.21255	5.3137	5	48.4069	58.0051	42.9727	27.4541	8.85124	5	64.809	26.9613	49.9371	19.0492	53.4418	86.7745	95.107	62.8408	2.62964	4.40473	4.37138	4.86811	4.64294	4.59944	2.61568	5.56849	4.7586
ASHGA5P030362	0.038166	-3.34411	down	noncoding	uc010ayj.2	HBT8	UCSC_knowngene	4102	chr15	+	25277533	25281635	ENST00000552334	AATCCAACAACTTTAGCAGTTTGTTTACCAGTTATTGAGTACCAACTGTGTTCAACATTG	intergenic							186.399	434.913	6.54247	8.2841	5	243.854	469.424	384.529	106.024	119.459	13.9181	148.985	812.437	280.252	122.14	457.154	358.251	587.113	427.041	2.62964	6.72738	7.53167	8.08005	6.53431	8.38173	5.71038	6.74462	9.56911
ASHGA5P025878	0.038296	-1.63986	down	noncoding	NR_045568	IRF3	RefSeq	1773	chr19	-	50162825	50169132		GACGCTGGAGGCCGGACCATGGGAACCCCAAAGCCACGGATCCTGCCCTGGCTGGTGTCG	exon sense-overlapping	NM_001197122	IRF3	interferon regulatory factor 3 isoform 2	-	50162825	50169132	89.1168	121.742	5.87584	6.58941	20.7434	151.239	136.313	115.934	108.723	9.35283	8.91963	161.71	127.835	154.954	94.9057	154.286	121.972	127.063	71.1752	5.94328	6.02505	5.65428	6.28404	6.57941	4.68424	4.97347	6.86296	7.0991
ASHGA5P017424	0.0384897	-3.11995	down	noncoding	uc001eks.3	LOC728875	UCSC_knowngene	775	chr1	-	144300511	144341755	ENST00000422124, ENST00000457991, NR_024511, TCONS_00000848, uc001eky.4, uc001esl.4	AGGGATGGTGCAGAATGGGGAAATGGAGAGAGAACCTGAAAGAGCCCCAAACTCGAGGAC	intronic antisense	ENST00000538264	AL592284.2	Uncharacterized protein [Source:UniProtKB/TrEMBL;Acc:F5H305]	+	144339737	144521058	1841.98	2831.6	9.58208	11.2236	64.6203	3434.42	5264.78	1820.93	1311.25	130.275	30.5297	2679.01	1635.69	2550.5	1078.05	3635.87	4392.17	4275.17	2253.72	7.28819	10.6255	11.4186	10.4435	10.2982	8.51091	6.91512	11.1566	10.4238
ASHGA5P015521	0.0385701	-3.71736	down	noncoding	uc001duc.3	BC045807	UCSC_knowngene	1293	chr1	+	101538215	101552819	ENST00000421013	GTCCAGCTAAGTACTTCCTAAGCGTGGCTACTCCAATGAAGCTTTAGTATATGTACTGAA	intergenic							92.7833	176.253	4.76267	6.65695	5	160.645	337.331	117.977	36.8951	5	5	74.4189	30.3975	161.129	37.8726	235.956	293.06	391.501	83.8522	2.62964	6.11497	7.03752	6.30774	5.05655	2.57053	2.61568	5.76873	4.94234
ASHGA5P058359	0.0385837	-2.0825	down	noncoding	uc001vdo.1	DLEU2	UCSC_knowngene	3068	chr13	-	50556687	50699677		TAAGTATTTAGGCCTACTCTAGGTGCGGTACTTCACTATAGTTTATAAAAGATGGTCCCT	intronic antisense	NM_173605	KCNRG	potassium channel regulatory protein isoform 1	+	50589389	50595058	22.0483	47.4405	3.73988	4.7982	5	32.4712	57.5509	32.7761	24.6555	5.81655	5	13.1166	11.6824	59.0235	7.39266	57.7905	110.356	57.3778	28.4604	2.62964	3.87731	4.36062	4.48601	4.49661	3.96849	2.61568	3.48467	3.57755
ASHGA5P027816	0.0386161	-2.12831	down	noncoding	ENST00000567749	RP13-735L24.1	GENCODE	4388	chr12	+	9520059	9550213		CAAGTCTAATGAAGTACCAGACACTTTTCTTTCTTCAACTATTGTCCTATCTTATTCAGG	intergenic							5.32039	21.3229	2.6734	3.76311	5	5	5	7.05857	5	5	5.50458	5	29.8409	10.7814	10.9308	33.1164	5.47794	54.1127	5	2.62964	2.32168	2.32183	2.71875	2.3654	2.57053	4.11919	2.34018	4.91695
ASHGA5P036838	0.0387139	-3.07669	down	noncoding	TCONS_00025860	XLOC_012138	LincRNAs identified by Cabili et al	907	chr17	+	20691696	20692707	ENST00000578585, NM_005063	GCTGTCATTAGTCTATATGGTTCTCCAAAAAATTGAATGAATCCATTGGAGAAGCAGTGG	intergenic							64.4561	102.605	4.55971	6.18109	5	123.768	95.9488	164.64	43.0464	5	5	73.2463	73.5305	49.8997	42.1378	99.0921	179.321	197.713	76.5406	2.62964	5.7296	5.11851	6.79463	5.27355	2.57053	2.61568	5.74554	6.29749
ASHGA5P053397	0.0387569	-4.39605	down	noncoding	ENST00000412059	GAS5	GENCODE	979	chr1	-	173833038	173837125	ENST00000454813, uc001gjk.3	TTATCCTAAACTAGGTGAGTCAGCTTTTGGTACATGTGATGATTTTCAGTGTAACCAATG	bidirectional	NM_001122770	ZBTB37	zinc finger and BTB domain-containing protein 37 isoform a	+	173837492	173855774	139.475	272.352	5.13286	7.26907	5	199.152	523.591	226.861	77.5327	5	5	73.6675	55.74	309.235	47.8699	384.037	549.361	474.332	85.8856	2.62964	6.42329	7.70285	7.27995	6.0884	2.57053	2.61568	5.75254	5.87902
ASHGA5P037456	0.038807	-2.74977	down	noncoding	NR_038883	LINC00649	RefSeq	2567	chr21	+	35303515	35343487		TCTGTCACCTCTTTCTAAAAGCTGGGAAATGGTTATTGTCAACGCCAGCCCCATTTTGGA	intergenic							164.44	283.632	6.03031	7.48962	12.2067	260.439	611.132	130.489	208.927	6.68214	5.78014	79.8654	146.416	191.334	48.9939	398.114	697.204	336.007	167.353	5.24939	6.82826	7.93034	6.46298	7.53364	4.17564	4.19592	5.86633	7.29479
ASHGA5P035284	0.0388541	-2.67649	down	noncoding	TCONS_00003380	XLOC_002282	LincRNAs identified by Cabili et al	2370	chr2	-	114464369	114467816		TTAGGGCCAAAACTACCCTGGTTTTGTCTTGCAACTTGAAACATTGTGTATTTTAAACTA	intergenic							364.589	583.18	7.36599	8.78634	8.28546	762.317	867.398	514.673	243.083	58.9225	10.9541	451.077	537.358	490.09	181.869	624.911	870.526	937.669	439.837	4.72947	8.39318	8.50281	8.49575	7.76563	7.35513	5.32475	8.36122	9.06014
ASHGA5P042661	0.0389418	-1.59837	down	noncoding	ENST00000440518	RP11-445F6.2	GENCODE	416	chr6	+	139604243	139608444	ENST00000441249	TTGGAGATGTGACCAGCTGCACATGACTTTACCTAAAAGCTTGCTATGTAAAGGACACTT	intronic antisense	NM_153235	TXLNB	beta-taxilin	-	139561198	139613208	11.4187	18.4204	3.04421	3.72081	5	19.6276	17.5348	15.7164	5.86064	5	5	17.6101	17.6383	20.0373	5	19.9523	26.6531	28.9906	10.6712	2.62964	3.28886	3.01765	3.5719	2.84645	2.57053	2.61568	3.81293	4.12135
ASHGA5P014635	0.0390699	-5.71907	down	noncoding	ENST00000414075	GAS5	GENCODE	413	chr1	-	173833038	173835344	ENST00000412059, ENST00000422008, ENST00000422183, ENST00000430245, ENST00000436285, ENST00000436656, ENST00000448718, ENST00000449589, ENST00000450589, ENST00000452197, ENST00000454068, ENST00000456812	CTGTGTGGAGCAAGTTTTAAAGAAGCAAAGGACTCAGAATTCATGATTGAAGAAATGCAG	intergenic							3508.71	6294.46	9.86608	12.3819	32.1128	4866.32	12567.4	5023.87	2776.77	86.0707	14.5593	2702.58	4252.6	3480.36	1630.74	8222.03	12741.7	8118.66	5615.11	6.48197	11.1244	12.8456	12.1476	11.4948	7.88841	5.77707	11.1687	11.5808
ASHGA5P027204	0.0390849	-3.35892	down	noncoding	ENST00000553202	RP11-350F4.2	GENCODE	5008	chr12	-	44112795	44117803		CATGAACACCTCTTTAATCACAAGTCCTCAACTCCAAGGTTAGCTTTATTTCAACTTTTA	intergenic							110.299	196.465	5.20258	6.95058	5	165.29	367.692	182.291	72.2768	7.28819	5	77.5574	56.1443	175.969	50.0434	277.399	328.505	392.666	94.5273	2.62964	6.16305	7.16154	6.94428	5.9808	4.29835	2.61568	5.82729	5.89245
ASHGA5P051845	0.0391912	-2.02421	down	noncoding	ENST00000435731	SDHAP1	GENCODE	548	chr3	-	195709163	195717176	ENST00000413474, ENST00000427415, ENST00000427841, ENST00000429897, ENST00000445430, ENST00000452844, ENST00000453324, ENST00000457233, NR_003265, uc011btp.1	GACTACAGACGTGTCGGGGGTCCGGGGCCTGTCGCGGTTGCCAAGCGCTCGGCGCCTGGC	intergenic							11.9496	33.2721	3.25365	4.27101	5	20.1096	22.7377	10.6268	10.1409	5.42908	5	16.5524	69.8815	12.5052	16.8122	91.438	15.3247	18.7003	8.24237	2.62964	3.31636	3.29322	3.12837	3.43086	3.87379	2.61568	3.74127	6.21181
ASHGA5P016501	0.0391968	-3.15011	down	noncoding	uc010lgv.1	PMS2P1	UCSC_knowngene	1245	chr7	-	99918262	99933930		TTGGCTTTCGGGGGGAAGCTCTGAGCTCACTTTGTGCACTGAGGACTCCTAGAAGTACCC	natural antisense	NM_001004351	SPDYE3	speedy protein E3	+	99905324	99919819	171.823	281.407	6.04765	7.70305	5	324.06	489.038	257.098	135.911	21.9923	5.34057	136.145	208.137	188.606	99.5108	371.696	366.126	509.427	226.344	2.62964	7.15167	7.5978	7.47551	6.9158	5.92104	4.06781	6.62196	7.80145
ASHGA5P023379	0.0392441	-2.01406	down	noncoding	ENST00000579679	AL353997.3	GENCODE	563	chr17	+	18323280	18325631	ENST00000583364	AAGGCAGGAGTGAGGCTGGGTCTCTGGAGCTGCCCCAGGGGCTGGACAAGCTGACCCTGC	intergenic							25.8072	35.994	3.76815	4.77825	5	49.7845	47.3241	30.0179	28.4296	5	5	35.9012	66.7198	30.7582	18.3421	38.7521	32.1466	39.9491	25.2903	2.62964	4.44451	4.09427	4.36313	4.69339	2.57053	2.61568	4.73405	6.14998
ASHGA5P053429	0.0395145	-1.86709	down	noncoding	ENST00000527672	AC022182.1	GENCODE	926	chr8	+	61831539	61879116		GGGTGAAGTCATTCTGGAGAACAAGGTAAATTATAGCCAAATTATATATTTGCATATGCC	intergenic							12.8864	25.9105	3.37726	4.27805	5	17.7416	20.5597	19.4967	5.37365	11.2807	5	18.6386	50.401	23.0676	10.7451	22.8993	27.3712	31.5831	15.306	2.62964	3.16663	3.18583	3.81143	2.77017	4.95529	2.61568	3.88338	5.71803
ASHGA5P038840	0.0396284	-1.71987	down	noncoding	ENST00000470427	RP11-755B10.2	GENCODE	364	chr3	+	57614536	57640645		CTTTACTTTGCTTTCAAGCTCAGTCTTGGTGTAAATCTATCACCTTCAATATAACTGGAT	natural antisense	NM_152678	FAM116A	protein FAM116A	-	57611180	57678816	11.5141	21.2886	3.30604	4.08834	5	15.7854	13.1839	21.0486	7.53034	5	7.71919	16.8456	33.1279	19.5352	16.422	17.4072	25.3693	20.8798	16.2785	2.62964	3.02178	2.74247	3.89881	3.10655	2.57053	4.71934	3.75919	5.06948
ASHGA5P040375	0.0396463	-3.76283	down	noncoding	ENST00000504053	RP11-5N11.1	pseudogene	364	chr5	-	31725645	31726009	NM_001191005, NM_054016	GCCTGCATCTCATACCAAAACTAGAGGCATCTCTAAAAACAGATTCCAAAGCACATTACA								119.993	186.583	5.10369	7.01551	5	172.828	375.005	205.331	79.8929	5	5	111.884	80.9449	151.049	61.3238	249.857	345.943	301.266	115.698	2.62964	6.22497	7.19368	7.12738	6.12922	2.57053	2.61568	6.33843	6.44525
ASHGA5P020789	0.0397108	-1.96061	down	noncoding	ENST00000519861	RP11-383J24.5	GENCODE	359	chr8	-	125485048	125486595		CATCTTTGAGCAAAAGGAGAGAGGCCATTATGGGGAAAAAGATCCAAAAGGACTCATCTA	bidirectional	NM_007218	RNF139	E3 ubiquitin-protein ligase RNF139	+	125487007	125500859	34.0461	56.5496	4.27505	5.24635	5.95276	52.1983	124.081	40.9947	15.2012	9.31424	5	19.6268	24.3128	53.816	21.5348	55.1437	75.2574	133.735	32.0474	4.25803	4.51183	5.51141	4.79947	3.88223	4.67897	2.61568	3.94277	4.59987
ASHGA5P020157	0.0397109	-2.36289	down	noncoding	ENST00000508877	CTC-338M12.5	GENCODE	392	chr5	+	180619069	180621428		TAGTGTTGTGGCTGCCCCACGAGAACCCTATATGCCAGTTCCAGAAGCAAAAACAAAAAA	natural antisense	NM_203293	TRIM7	tripartite motif-containing protein 7 isoform 1	-	180620923	180632177	44.6393	58.0503	4.24345	5.484	5	61.886	119.268	68.6138	36.2798	5	5	56.0669	46.9624	48.3295	35.3501	66.8059	84.2729	83.1047	41.5269	2.62964	4.75082	5.45249	5.53177	5.03363	2.57053	2.61568	5.36299	5.60903
ASHGA5P043035	0.0397143	-2.215	down	noncoding	ENST00000454572	POLR2J4	GENCODE	2076	chr7	-	43991508	44058750		GTGCACTTACTCTCATCATTGTAATGACACTTGATGCTATGAGACTATAAATTAGAGAGA	intronic antisense	NM_175064	SPDYE1	putative WBSCR19-like protein 6	+	44040488	44049723	34.0979	57.3838	4.21051	5.35782	5	76.8774	81.2425	49.6174	22.7201	12.4028	5	19.9229	117.77	40.5784	18.8791	53.6343	64.8396	68.8743	37.111	2.62964	5.05419	4.87537	5.06508	4.3885	5.09362	2.61568	3.962	6.98325
ASHGA5P045219	0.0398672	-3.24949	down	noncoding	uc004aas.1	BC062753	UCSC_knowngene	868	chr9	-	37881889	37882757		AATATTAAATATGTGTTGCCTATTGGCTCCCAAATTGTGTGGGAGTCTCTAAATGTTTCC	intergenic							223.052	377.631	6.41153	8.11174	8.16707	466.736	568.316	383.342	178.74	30.418	5	143.699	198.295	375.286	111.354	552.548	584.563	556.282	265.092	4.70789	7.66831	7.81966	8.07486	7.31122	6.39489	2.61568	6.6997	7.74378
ASHGA5P043368	0.0400809	-2.26921	down	noncoding	ENST00000467537	RP5-894A10.2	GENCODE	770	chr7	-	141352180	141356610		CCTGCCATGTCTTAAGGAACTCATATACATAGTCTTTCTATATTATGCTAATCCTTCTCA	exon sense-overlapping	NM_001080392	KIAA1147	protein LCHN	-	141356527	141401953	787.359	1677.97	9.05534	10.2375	33.6513	1212.61	1929.73	1260.74	423.867	608.98	147.093	682.202	4030.98	1076.18	557.265	1534.2	1740.1	1804.69	1002.35	6.5381	9.04702	9.74256	9.90299	8.60017	10.4792	9.10944	9.02322	11.5187
ASHGA5P035248	0.0401164	-3.79956	down	noncoding	ENST00000416673	RPL23AP7	GENCODE	2078	chr2	-	114368078	114384617	ENST00000442116, ENST00000480246	ATTGAGAGACACACATAGTGGTCAAACACGATTTCAGCCATGAATCAGGCATAAATATTC	bidirectional	NM_007082	RABL2A	rab-like protein 2A	+	114384816	114400975	95.8822	426.679	5.54351	7.46935	5	149.119	211.66	157.342	177.991	8.0888	15.9999	41.856	120.604	84.8605	73.5243	481.611	1359.96	825.204	40.9905	2.62964	6.00384	6.34011	6.73806	7.30359	4.46603	5.9218	4.94505	7.01796
ASHGA5P053792	0.0401678	-1.53585	down	noncoding	ENST00000563434	RP11-4O1.2	GENCODE	4488	chr9	-	114794834	114800010		ATTCCTGTCATATGTTTTGTAAACAATTTTTCGAGTTCATAATTTTTCAATCTTGTTTGT	intergenic							11.7895	17.7499	3.00756	3.62659	5	17.9195	30.4282	16.6702	5.54604	5	5	8.7521	18.8484	22.9028	5	25.9304	24.8952	18.8377	7.83445	2.62964	3.17936	3.60092	3.63694	2.79785	2.57053	2.61568	3.02952	4.22109
ASHGA5P030266	0.0401681	-2.36475	down	noncoding	ENST00000561674	RP11-152L20.3	GENCODE	1304	chr15	-	92691981	92874267		ATGGAGCTGCAGTGCCATAATTTAACTCACTATTCCAATTCAGGTTTTTCTGCTATTATA	intronic antisense	NM_001145044	SLCO3A1	solute carrier organic anion transporter family member 3A1 isoform 2	+	92396937	92715665	12.244	36.9471	3.29234	4.53403	5	22.613	19.1003	17.1916	14.8771	9.17013	5	5	37.5283	50.3249	5	20.1734	23.7326	82.8647	39.0054	2.62964	3.45056	3.11298	3.67065	3.86083	4.65819	2.61568	2.34018	5.2685
ASHGA5P029626	0.0402092	-2.44614	down	noncoding	ENST00000553944	ACTN1-AS1	GENCODE	475	chr14	+	69446757	69448270		ATCACCGCTTCTAAACTGTGGCTCTAAACCTAACACAGAGGGTAATGGTAGTGCTGTATC	bidirectional	NM_001102	ACTN1	alpha-actinin-1 isoform b	-	69340839	69446083	53.716	122.933	5.16055	6.45106	5	77.0714	113.871	58.6392	31.5356	51.9464	9.03702	82.6272	277.325	135.249	44.0739	105.238	107.717	107.292	83.6338	2.62964	5.05779	5.37959	5.30813	4.83637	7.16777	4.99292	5.91221	8.20611
ASHGA5P026294	0.0402915	-3.3676	down	noncoding	NR_015451	LINC00294	RefSeq	3322	chr11	+	33097695	33101000		TTCATCATCTCTTCTATACTAGAGCTGCAGTCTTACATTTGCTTACTTCCTGACATCCAC	intron sense-overlapping	ENST00000324357	TCP11L1	t-complex 11 (mouse)-like 1 [Source:HGNC Symbol;Acc:25655]	+	33080517	33127488	271.539	483.882	6.75661	8.50833	5	531.594	691.536	433.577	212.053	40.9398	10.9215	246.687	560.435	315.208	147.675	532.159	781.139	597.057	453.501	2.62964	7.86376	8.12977	8.25274	7.55761	6.82372	5.31965	7.47601	9.11227
ASHGA5P045359	0.0403602	-2.0789	down	noncoding	TCONS_00000848	XLOC_000063	LincRNAs identified by Cabili et al	444	chr1	+	16847380	16848264	ENST00000416869, ENST00000422124, ENST00000452795, uc001azs.1	TCTGTGTTCCTTTTGGCAAAGGACTTGCTCCCATTGTTTGCTTGTTCAATTGTCTGTCCG	intergenic							4616.48	8364.96	11.656	12.7118	373.734	8718.41	10762.6	5062.82	2700.09	3353.71	810.951	5149.48	19984.1	4725.68	3291.32	7824.59	8291.12	8943.33	5494.6	9.25869	12.1154	12.5813	12.1656	11.4312	12.4396	11.0875	12.1686	13.1614
ASHGA5P031094	0.0405044	-2.20966	down	noncoding	TCONS_00017504	XLOC_008152	LincRNAs identified by Cabili et al	2622	chrX	-	46458742	46461839	NM_001257291, NM_032591	AAGTACAGCTGAAAAGATCACGAAAACCTTGGAGCCTTCGAGGAAAGAGAAGGGTGACTT	exon sense-overlapping	NM_001257291	SLC9A7	sodium/hydrogen exchanger 7 isoform 1 precursor	-	46458685	46618607	42.3125	71.3289	4.4933	5.63712	5	60.8532	123.768	38.5294	46.4402	15.1258	5	43.7833	50.9466	65.8847	21.2059	72.4734	159.645	72.0127	57.1346	2.62964	4.72483	5.50651	4.70975	5.36818	5.38131	2.61568	5.0105	5.73524
ASHGA5P037750	0.0405383	-1.75307	down	noncoding	NR_027036	LOC100271722	RefSeq	1625	chr22	-	46435786	46440748		ACCCATGAGGTAATTACTGAATGCATTTGGTTGAAAGTCCTTCTGCTATATTTTCCAAAC	intergenic							20.5557	25.9948	3.4691	4.27899	5	58.3589	37.6207	22.9934	10.4214	5	5	20.0509	28.7815	23.2507	7.42799	32.5759	34.5451	36.3629	19.02	2.62964	4.66856	3.82939	4.00567	3.46178	2.57053	2.61568	3.97157	4.86599
ASHGA5P040658	0.0406182	-1.64452	down	noncoding	uc003kuq.1	FLJ33630	UCSC_knowngene	2019	chr5	-	127301575	127419299	ENST00000501652	GTTAATTTATTATTCATTGGAGTTAGAAAATTGTTGCTAAAATAAATTCTGCATTTTGAA	bidirectional	NM_001046	SLC12A2	solute carrier family 12 member 2 isoform 1	+	127419482	127525380	14.9784	18.0159	3.07735	3.79502	5	21.0268	51.2199	17.7831	5	5	5	9.79766	30.4378	16.9899	13.1178	26.0525	16.8909	14.5852	8.03715	2.62964	3.36464	4.20109	3.71006	2.3654	2.57053	2.61568	3.16176	4.94434
[truncated: 102 more rows]
[truncated: 6 more columns]
